# Supplementary material for: Genome-Wide Identification and Characterization of Long Noncoding RNAs in Populus × canescens Roots Treated With Different Nitrogen Fertilizers
Source: Front Plant Sci. 2022 May 12;13:890453. doi: 10.3389/fpls.2022.890453 (PMC9135444; doi:10.3389/fpls.2022.890453)
Supplement: Supplementary file 1 [file Data_Sheet_1.xlsx]

## Sheet: Table S1
Supplementary Table 1 Primers used for RT–qPCR.
	lncRNA, miRNA/mRNA IDs	Primer sequences
lncRNA	MSTRG.5060.3 F'	ACTTTTGCTTGCTTGCGAAT
	MSTRG.5060.3 R'	GGTTCCTGGATGCAGTTGAT
	MSTRG.17693.2 F'	ATGCGAAATTCTCTTCATCG
	MSTRG.17693.2 R'	CATGGGTCTCATCACTTTTGAA
	MSTRG.13697.1 F'	TTGCGCATATTCATCAGGAG
	MSTRG.13697.1 R'	CACAAGATGGCTGTTTCACG
	MSTRG.28891.2 F'	TGGAAAACACGCAAGTCAGA
	MSTRG.28891.2 R'	CACTGCTGCCCATATGAATG
	MSTRG.26423.1 F'	TTTCGGTTTGGGAACTTCTG
	MSTRG.26423.1 R'	TTACGACTCCAATCCGAAGC
	MSTRG.21715.5 F'	TGGTGAGTTCAACAACTCAGTG
	MSTRG.21715.5 R'	CTTGGGAGTCACCAACCTGT
	MSTRG.23827.1 F'	TTTCATTCTCACCACCACCA
	MSTRG.23827.1 R'	CTCAAGGAATTGCCCAAGG
	MSTRG.19724.3 F'	TGCTTGCCTGCTTAAGCTCT
	MSTRG.19724.3 R'	CAATGGCTGTCGTGAAACAG
	MSTRG.11381.1 F'	CTAGCTGCACGATTTGCTTG
	MSTRG.11381.1 R'	AGCCATCTCAGCGTGCTATT
	MSTRG.8197.3 F'	TGGCTCGAAAGATCAGAGGT
	MSTRG.8197.3 R'	TTGCAAAGATGGTGCTTGTC
	MSTRG.19654.1 F'	CTGGGTGTCATGCATCGTT
	MSTRG.19654.1 R'	TTCGAGGGTCTCTCAACCAC
	MSTRG.8501.1 F'	GCACCAATTCTCCCGAAATA
	MSTRG.8501.1 R'	CAGTGAACAGGGCTTGATGA
	MSTRG.1898.1 F'	TGGGAAAGAATAACGGCTGA
	MSTRG.1898.1 R'	CGAGGAAAAGGAAAAGCACA
	MSTRG.1756.1 F'	TTCCATTGCCGAAGTCAAAT
	MSTRG.1756.1 R'	ACGTGTGCTTTGGGTTTCTC
	MSTRG.28061.3 F'	AAATCCTGCTGCTGCAAACT
	MSTRG.28061.3 R'	GTGAAAGCCTGGTGGTTGTT
	MSTRG.12806.2 F'	CTTTTCGTGACGAGGGTGAT
	MSTRG.12806.2 R'	TTGAAATTGGGGGCTTGTAG
	MSTRG.3196.1 F'	ACAAGCAAGTGCGTGTGAAG
	MSTRG.3196.1 R'	AAGGGTTTTCTTGGGAATGG
	MSTRG.2693.1 F'	CAGGGTAGCCAAGGAGACTG
	MSTRG.2693.1 R'	GGAGGGAGGCCTTACATGA
	MSTRG.24273.2 F'	GCCCCCTCTGACACAAATTA
	MSTRG.24273.2 R'	GTAGGAAGGCCTCGGAGATT
	MSTRG.2755.1 F'	TGATTAACCATCACCACCACA
	MSTRG.2755.1 R'	CCATCACTCGTGATCGAAGAT
	MSTRG.2693.1 F'	CAGGGTAGCCAAGGAGACTG
	MSTRG.2693.1 R'	GGAGGGAGGCCTTACATGA
	MSTRG.6004.1 F'	CAAGCACTTTTGGGTTGGTT
	MSTRG.6004.1 R'	TGCAAGGACACTTCGTATGC
	MSTRG.6005.1 F'	GGAAAAGATCCCCTCCAAAG
	MSTRG.6005.1 R'	AACCAACCCAAAAGTGCTTG
	MSTRG.24876.1 F'	TTATGTCCAGCCAATCCAAA
	MSTRG.24876.1 R'	TCTATTCGGGAGGAATTGAGA
	MSTRG.30693.1 F'	GGAGTGGTTCTGCCACGTAT
	MSTRG.30693.1 R'	TCCCCAGCAAGTTATGGAAG
	Actin F'	CCCATTGAGCACGGTATTGT
	Actin R'	TACGACCACTGGCATACAGG
	EF1α-qF	TCCCTTTGTCCCAATCTCTG
	EF1α-qR	ACATCCTGAAGTGGGAGACG
miRNA	mdm-miR169b_R-1	TAGCCAAGGATGATTTGCCTG
	ptc-miR169i_1ss15TA	TAGCCAAGGATGACATGCCTG
	gra-MIR8654c-p3_2ss12TG18AG	CAAAATTTGTGGCAGAGG
	ptc-miR396e-3p	CTCAAGAAAGCTGTGGGAGA
	gma-miR1511_R-2	AACCAGGCTCTGATACCA
	URT primer	provided by the Mir-X miRNA First-Strand Synthesis and SYBR qRT-PCR kita
	U6 F	provided by the Mir-X miRNA First-Strand Synthesis and SYBR qRT-PCR kitb
	U6 R	provided by the Mir-X miRNA First-Strand Synthesis and SYBR qRT-PCR kita
	5.8s rRNA F'	ctcggctctcgcatcgatga
	5.8s rRNA R'	agacgtgccctcgaccaaga
mRNA	Potri.009G019200.1 F'	GCTCAGGCAAACAAAAGGAG
	Potri.009G019200.1 R'	TGGAATCACACGTTGCAGTT
	Potri.002G215100.1 F'	GCATCAGCTCAAAGTGGTGA
	Potri.002G215100.1 R'	GGCCTCACGGTTGTACCTAA
	Potri.014G086300.1 F'	GTGGTTGTTGAACGATGTGC
	Potri.014G086300.1 R'	CGGGCATCAAGGAAAGATAA
	Potri.018G064700.2 F'	GAGTTCTGTGGGAGGGATCA
	Potri.018G064700.2 R'	GATGGGGCTGAATAAAAGCA
	Potri.017G075400.1 F'	CTCACCCTCCAGAAATTCCA
	Potri.017G075400.1 R'	AACAAGGGTTTGATGCCAAG
	Potri.014G086500.1 F'	ACCAACCACAACCACCAAAT
	Potri.014G086500.1 R'	ACTGGTACAGGCCACAAAGG
	Potri.002G012000.2 F'	CCCGTTCACTAGCTTTCTCG
	Potri.002G012000.2 R'	AGCAAGCTTGTGGAGGATGT
	Potri.001G330900.3 F'	ACAAGAACCACCTCGTCACC
	Potri.001G330900.3 R'	TCGATCAAACCACGAATCAA
	Potri.001G323100.1 F'	GTGACTGAAGTGGGCTTGGT
	Potri.001G323100.1 R'	GTATCAGCGTCCGGTTTTGT
	potri.002g236800.2 F'	GCGTAATGAAGTTCGGTGGT
	potri.002g236800.2 R'	CCGCAACTAACAGCCTTCTC
	Potri.013G106300.1 F'	TGGCTTGTTGACGCTATCAG
	Potri.013G106300.1 R'	GAATGAGCTTTTGGCTTTGC
	Potri.017G152800.2 F'	AGAATTCAGGCAATGCCAAG
	Potri.017G152800.2 R'	GAAGCTGCTGCCTACATTCC
	Actin F'	CCCATTGAGCACGGTATTGT
	Actin R'	TACGACCACTGGCATACAGG
miRNAs and target genes in the transient co-expression assay	MSTRG.2693.1	cagtGGTCTCacaacataatcatatgcattctttg
	MSTRG.2693.1	cagtGGTCTCatacagggcaatcgatctgagaggg
	PcNFYA2 F'	ACATTTAAATACTAGATGGCTTTACGAATTCAGAACTTGC
	PcNFYA2 R'	CCCTTGCTCACCATGCTGGATATAAGTGGTTTGATGCTAG
	ptc-miR169b F'	CGGTACCCGGGGATCCTCTAGACCAGAGGTGCAGAGCTGATA
	ptc-miR169b R'	GGGCGAATTGGTCGACTGGGAAGAGAAGGGCATGGCATG
	MSTRG.13550.1 F'	ACATTTAAATACTAGATGCTCATCTTCATCTTCATCA
	MSTRG.13550.1 R'	CCCTTGCTCACCATGTTGAAGGAGCTCTCAA
	vvi-MIR171i F'	TTTGGAGAGGACAGGATTGGTGCCAGTTCAAGACC
	vvi-MIR171i R'	GCAGGTCGACTCTAGCATGTCGGGAAAGAAAATGG
	CDL1 F'	ACATTTAAATACTAGATGCGCCACACATTATCATTCC
	CDL1 R'	CCCTTGCTCACCATGTGACTTTAAATGCCTAACAAAAC
	tobacco tublin F'	ATGAGAGAGTGCATATCGAT
	tobacco tublin R'	TTCACTGAAGAAGGTGTTGAA
a: Mir-X miRNA First-Strand Synthesis and SYBR qRT-PCR kit (68313, Clontech Laboratories, CA, USA)
b: From Cao D et al (2016) Transcriptome and Degradome Sequencing Reveals Dormancy Mechanisms of Cunninghamia lanceolata Seeds. Plant physiology 172: 2347-2362

## Sheet: Table S2
Supplementary Table 2 Statistical data of the RNA-seq reads in the nine libraries constructed from roots of P. × canescens exposed to media containing NO3-, NH4NO3 and NH4+ media for 21 days
Sample	Raw Data		Valid Data		Valid Ratio(reads)	Mapped reads	Q20%	Q30%	GC content%
	Read	Base	Read	Base
NO3-_1	83604848	12.54G	82474186	12.37G	98.65	64459428(81.36%)	99.9	98.44	44
NO3-_2	85211296	12.78G	84468550	12.67G	99.13	67801343(81.90%)	99.9	98	44
NO3-_3	84381670	12.66G	83500676	12.53G	98.96	68690644(84.18%)	99.89	98.3	44
NH4NO3_1	84975360	12.75G	84230798	12.63G	99.12	68582843(82.56%)	99.94	97.68	43
NH4NO3_2	85426594	12.81G	84532996	12.68G	98.95	66661250(79.73%)	99.91	98.1	43
NH4NO3_3	84185608	12.63G	83067694	12.46G	98.67	68412779(84.53%)	99.89	98.58	44
NH4+_1	85521734	12.83G	84864092	12.73G	99.23	70295931(84.04%)	99.89	97.52	44
NH4+_2	84435284	12.67G	83958696	12.59G	99.44	66974740(81.07%)	99.92	97.63	43
NH4+_3	85650516	12.85G	84481416	12.67G	98.64	68745419(82.67%)	99.84	97.71	44

## Sheet: Table S3
Supplementary Table 3 Identification of lncRNAs in P. × canescens
LncRNA	class_code	CPC_Score	CNCI_Score	chr	strand	start	end	num_exons	length	gene_id	Nearest reference gene
MSTRG.10002.1	j	0.04798	-0.02048	Chr04	-	24012806	24015609	2	713	MSTRG.10002	Potri.004G234200
MSTRG.10006.1	u	0.0159021	-0.217088	Chr04	.	24070716	24070933	1	218	MSTRG.10006	.
MSTRG.10022.1	u	1.52034e-05	-0.0135168	Chr04	-	24168731	24169231	2	203	MSTRG.10022	.
MSTRG.10051.3	j	0.034924	-0.077824	Chr05	-	130453	131251	2	671	MSTRG.10051	Potri.005G002200
MSTRG.10068.1	o	0.00815996	-0.094208	Chr05	-	248038	272102	2	363	MSTRG.10068	Potri.005G004300
MSTRG.10069.1	o	0.0404424	-0.09216	Chr05	+	257393	270917	2	1330	MSTRG.10069	Potri.005G004100
MSTRG.10085.1	u	0.0268974	-0.0151552	Chr05	.	407957	408249	1	293	MSTRG.10085	.
MSTRG.10087.1	u	0.0130488	-0.004096	Chr05	.	408559	409128	1	570	MSTRG.10087	.
MSTRG.10094.1	u	0.00639014	-0.126976	Chr05	-	971581	973049	2	508	MSTRG.10094	.
MSTRG.10099.1	x	0.143223	-0.016384	Chr05	-	1001633	1001904	2	245	MSTRG.10099	Potri.005G013000
MSTRG.10102.1	x	0.0468262	-0.0864256	Chr05	+	442600	514525	2	219	MSTRG.10102	Potri.005G007900
MSTRG.10110.1	x	0.130133	-0.139264	Chr05	+	543667	555726	2	300	MSTRG.10110	Potri.005G008500
MSTRG.10111.1	x	0.0228575	-0.016384	Chr05	+	544092	556141	2	290	MSTRG.10111	Potri.005G008500
MSTRG.10112.1	x	0.061841	-0.0376832	Chr05	+	544799	556884	2	212	MSTRG.10112	Potri.005G008500
MSTRG.10113.1	u	0.0114508	-0.0004096	Chr05	+	563479	570552	2	236	MSTRG.10113	.
MSTRG.10116.1	o	0.00440287	-0.109773	Chr05	+	629367	750936	2	239	MSTRG.10116	Potri.005G009500
MSTRG.10140.1	o	0.0331645	-0.004096	Chr05	+	824537	887515	2	298	MSTRG.10140	Potri.005G011800
MSTRG.1020.3	j	0.253214	-0.032768	Chr01	-	9308932	9311468	3	1912	MSTRG.1020	Potri.001G116100
MSTRG.10218.2	j	0.010985	-0.08192	Chr05	-	1666418	1668088	2	1556	MSTRG.10218	Potri.005G021600
MSTRG.10223.1	o	0.0360462	-0.065536	Chr05	+	1721736	1723609	2	698	MSTRG.10223	Potri.005G022500
MSTRG.10223.2	o	0.0407364	-0.176128	Chr05	+	1721736	1723138	2	439	MSTRG.10223	Potri.005G022500
MSTRG.10229.1	o	0.07519	-0.04096	Chr05	-	1751243	1755670	2	505	MSTRG.10229	Potri.005G023100
MSTRG.10231.1	u	1.25765e-05	-0.0004096	Chr05	+	1761620	1766656	2	235	MSTRG.10231	.
MSTRG.10233.1	u	0.0422125	-0.125338	Chr05	+	1766126	1766483	1	358	MSTRG.10233	.
MSTRG.10234.1	u	0.0572391	-0.149094	Chr05	-	1766128	1766477	1	350	MSTRG.10234	.
MSTRG.10242.1	u	0.038129	-0.0004096	Chr05	.	1826049	1826497	1	449	MSTRG.10242	.
MSTRG.1026.1	i	0.0432322	-0.08192	Chr01	.	9365104	9365912	1	809	MSTRG.1026	Potri.001G116700
MSTRG.10276.1	o	0.027352	-0.0323584	Chr05	+	2129302	2169082	2	519	MSTRG.10276	Potri.005G029300
MSTRG.10276.2	o	0.0202343	-0.036864	Chr05	+	2129327	2230677	2	441	MSTRG.10276	Potri.005G029300
MSTRG.10278.1	o	0.0140915	-0.0004096	Chr05	+	2140604	2195758	2	445	MSTRG.10278	Potri.005G029300
MSTRG.10283.1	o	0.134782	-0.121242	Chr05	-	2190812	2241053	2	242	MSTRG.10283	Potri.005G030000
MSTRG.10288.1	x	0.00935096	-0.0385024	Chr05	+	2261434	2266632	2	239	MSTRG.10288	Potri.005G030300
MSTRG.10291.1	o	0.159582	-0.036864	Chr05	+	2272333	2384883	2	300	MSTRG.10291	Potri.005G030900
MSTRG.10294.1	o	0.149644	-0.073728	Chr05	+	2283672	2401982	2	352	MSTRG.10294	Potri.005G030900
MSTRG.10310.1	i	0.0302842	-0.180224	Chr05	-	2425806	2426200	1	395	MSTRG.10310	Potri.005G032400
MSTRG.10311.1	x	0.0517845	-0.0004096	Chr05	-	2426557	2452614	2	797	MSTRG.10311	Potri.005G032600
MSTRG.10312.1	o	0.00515446	-0.0004096	Chr05	+	2426557	2452259	2	444	MSTRG.10312	Potri.005G032600
MSTRG.10313.1	x	0.121904	-0.0393216	Chr05	-	2428212	2453471	2	205	MSTRG.10313	Potri.005G032600
MSTRG.10313.2	x	0.00764417	-0.0544768	Chr05	-	2436643	2453472	2	293	MSTRG.10313	Potri.005G032600
MSTRG.10314.1	x	0.0407625	-0.118784	Chr05	-	2428916	2454299	3	328	MSTRG.10314	Potri.005G032600
MSTRG.10315.1	x	0.0256148	-0.0483328	Chr05	-	2429849	2468303	4	490	MSTRG.10315	Potri.005G032800
MSTRG.10317.1	x	0.0183917	-0.13271	Chr05	-	2438125	2468111	3	544	MSTRG.10317	Potri.005G032800
MSTRG.10329.1	x	0.0221803	-0.0004096	Chr05	+	2662992	2663299	2	273	MSTRG.10329	Potri.005G036300
MSTRG.10341.1	o	0.118111	-0.0782336	Chr05	+	2557587	2611938	2	218	MSTRG.10341	Potri.005G034700
MSTRG.10343.1	o	1.3451e-05	-0.17408	Chr05	-	2564943	2619536	2	298	MSTRG.10343	Potri.005G034800
MSTRG.10344.1	o	0.013637	-0.0483328	Chr05	-	2565713	2620305	2	297	MSTRG.10344	Potri.005G034800
MSTRG.10347.1	o	0.0317333	-0.057344	Chr05	+	2590156	2642501	2	462	MSTRG.10347	Potri.005G035400
MSTRG.10348.1	o	0.0168272	-0.0004096	Chr05	+	2592326	2644569	2	393	MSTRG.10348	Potri.005G035400
MSTRG.10360.1	i	0.0435236	-0.0004096	Chr05	.	2925113	2925423	1	311	MSTRG.10360	Potri.005G039900
MSTRG.10382.1	x	0.00278404	-0.14377	Chr05	+	3226507	3238812	2	267	MSTRG.10382	Potri.005G044000
MSTRG.10383.1	x	1.05267e-05	-0.22569	Chr05	+	3238515	3249355	2	266	MSTRG.10383	Potri.005G044000
MSTRG.10399.1	x	7.88099e-06	-0.0385024	Chr05	-	3003534	3019440	2	262	MSTRG.10399	Potri.005G041300
MSTRG.10402.1	x	0.00554331	-0.057344	Chr05	-	3010857	3027166	2	292	MSTRG.10402	Potri.005G041100
MSTRG.10404.1	o	0.0065442	-0.151552	Chr05	-	3021383	3141711	3	283	MSTRG.10404	Potri.005G041400
MSTRG.10404.2	o	0.00329822	-0.057344	Chr05	-	3082543	3141669	3	216	MSTRG.10404	Potri.005G042100
MSTRG.10404.3	o	0.0118375	-0.0004096	Chr05	-	3082548	3105443	2	238	MSTRG.10404	Potri.005G042100
MSTRG.10410.1	o	0.0142333	-0.0217088	Chr05	-	3089689	3161088	2	320	MSTRG.10410	Potri.005G042700
MSTRG.10410.2	o	0.0264002	-0.034816	Chr05	-	3089689	3161088	3	318	MSTRG.10410	Potri.005G042700
MSTRG.10411.1	o	0.0089834	-0.006144	Chr05	-	3090929	3108794	3	354	MSTRG.10411	Potri.005G042100
MSTRG.10413.1	x	0.0164021	-0.090112	Chr05	-	3099087	3099622	2	309	MSTRG.10413	Potri.005G042200
MSTRG.10414.1	o	0.00896133	-0.02048	Chr05	-	3141439	3162290	2	308	MSTRG.10414	Potri.005G042700
MSTRG.10415.1	o	0.00287007	-0.086016	Chr05	-	3145816	3165811	2	264	MSTRG.10415	Potri.005G042700
MSTRG.10418.1	o	0.00937849	-0.0004096	Chr05	+	3148866	3168626	2	206	MSTRG.10418	Potri.005G042900
MSTRG.10424.1	u	0.0157196	-0.02048	Chr05	+	3369531	3370813	2	355	MSTRG.10424	.
MSTRG.1043.1	x	0.112573	-0.036864	Chr01	-	9517062	9518582	2	397	MSTRG.1043	Potri.001G118600
MSTRG.1043.2	x	0.109049	-0.077824	Chr01	-	9517069	9518553	3	517	MSTRG.1043	Potri.001G118600
MSTRG.10433.1	i	0.00831319	-0.0004096	Chr05	+	3467816	3468283	2	431	MSTRG.10433	Potri.005G047600
MSTRG.10435.1	u	0.158167	-0.106496	Chr05	+	3501755	3501985	1	231	MSTRG.10435	.
MSTRG.10443.1	x	0.0260936	-0.0978944	Chr05	-	3552640	3553011	2	345	MSTRG.10443	Potri.005G049100
MSTRG.10443.2	x	0.0260936	-0.0876544	Chr05	-	3552640	3553011	2	345	MSTRG.10443	Potri.005G049100
MSTRG.10443.3	x	0.00845048	-0.0835584	Chr05	-	3552641	3552985	2	264	MSTRG.10443	Potri.005G049100
MSTRG.10444.1	x	0.0168505	-0.077824	Chr05	-	3554117	3554719	2	579	MSTRG.10444	Potri.005G049100
MSTRG.10456.1	x	0.00563227	-0.159744	Chr05	+	3616213	3629172	3	298	MSTRG.10456	Potri.005G050500
MSTRG.10473.1	u	0.0735324	-0.2048	Chr05	.	3749722	3749974	1	253	MSTRG.10473	.
MSTRG.10494.1	x	0.184311	-0.270336	Chr05	-	3897090	3897327	2	205	MSTRG.10494	Potri.005G054900
MSTRG.10504.2	j	0.2121	-0.0454656	Chr05	+	3976660	3979246	2	1111	MSTRG.10504	Potri.005G056500
MSTRG.10531.1	x	0.0523733	-0.487424	Chr05	+	4227711	4227933	2	202	MSTRG.10531	Potri.005G060100
MSTRG.10532.1	x	0.0995245	-0.0004096	Chr05	-	4231578	4239814	2	236	MSTRG.10532	Potri.005G060200
MSTRG.10533.1	x	0.0163676	-0.0004096	Chr05	-	4234052	4242304	2	242	MSTRG.10533	Potri.005G060200
MSTRG.10537.1	u	0.0060339	-0.004096	Chr05	-	4293075	4295475	2	1237	MSTRG.10537	.
MSTRG.1054.1	u	0.0597342	-0.012288	Chr01	.	9653129	9653609	1	481	MSTRG.1054	.
MSTRG.10542.1	x	0.00307384	-0.0004096	Chr05	+	4330393	4413090	2	216	MSTRG.10542	Potri.005G062000
MSTRG.10543.1	i	0.00475416	-0.0073728	Chr05	.	4335455	4335786	1	332	MSTRG.10543	Potri.005G061800
MSTRG.1055.1	u	0.011539	-0.0909312	Chr01	.	9654820	9655199	1	380	MSTRG.1055	.
MSTRG.10550.1	i	0.01661	-0.053248	Chr05	+	4503624	4504340	1	717	MSTRG.10550	Potri.005G062800
MSTRG.10567.1	u	0.467638	-0.012288	Chr05	.	4634389	4634914	1	526	MSTRG.10567	.
MSTRG.10575.1	x	0.0276471	-0.016384	Chr05	-	4703690	4704490	4	677	MSTRG.10575	Potri.005G065200
MSTRG.10587.1	u	0.0117253	-0.073728	Chr05	-	4818771	4819214	2	355	MSTRG.10587	.
MSTRG.10595.1	u	0.00893866	-0.155238	Chr05	+	4867515	4867793	1	279	MSTRG.10595	.
MSTRG.10601.1	i	0.00648514	-0.0004096	Chr05	+	4923121	4923433	2	293	MSTRG.10601	Potri.005G068700
MSTRG.10617.3	j	0.0769735	-0.028672	Chr05	+	5069871	5070850	3	234	MSTRG.10617	Potri.005G070600
MSTRG.10624.1	i	0.117491	-0.057344	Chr05	+	5107292	5108580	2	1264	MSTRG.10624	Potri.005G071000
MSTRG.10628.1	j	0.00640906	-0.053248	Chr05	+	5167009	5170788	2	702	MSTRG.10628	Potri.005G071700
MSTRG.10649.1	i	0.0353311	-0.0004096	Chr05	.	5377229	5377615	1	387	MSTRG.10649	Potri.005G073900
MSTRG.10652.1	u	0.0132199	-0.057344	Chr05	.	5421574	5421807	1	234	MSTRG.10652	.
MSTRG.10659.1	u	0.00893932	-0.253952	Chr05	.	5491696	5491953	1	258	MSTRG.10659	.
MSTRG.1066.1	x	0.0467125	-0.0438272	Chr01	-	9777514	9777788	2	254	MSTRG.1066	Potri.001G121200
MSTRG.10666.1	i	0.0493743	-0.0196608	Chr05	-	5541002	5541529	2	429	MSTRG.10666	Potri.005G075700
MSTRG.10678.1	i	0.0253469	-0.069632	Chr05	+	5635367	5636386	1	1020	MSTRG.10678	Potri.005G076700
MSTRG.10687.1	i	0.00505259	-0.008192	Chr05	.	5742438	5742794	1	357	MSTRG.10687	Potri.005G077900
MSTRG.10695.1	u	0.01104	-0.0098304	Chr05	.	5787226	5787432	1	207	MSTRG.10695	.
MSTRG.10722.1	i	0.0450956	-0.0004096	Chr05	+	5994548	5994804	2	236	MSTRG.10722	Potri.005G081500
MSTRG.10728.1	x	0.00763463	-0.0004096	Chr05	-	6042880	6043211	2	252	MSTRG.10728	Potri.005G082000
MSTRG.10736.1	u	0.0231659	-0.057344	Chr05	.	6156560	6157559	1	1000	MSTRG.10736	.
MSTRG.10741.1	x	0.0108335	-0.012288	Chr05	+	6160246	6160536	2	271	MSTRG.10741	Potri.005G083200
MSTRG.1076.1	x	0.0188653	-0.0401408	Chr01	+	9897272	9897529	2	207	MSTRG.1076	Potri.001G122400
MSTRG.10764.1	x	0.0156961	-0.049152	Chr05	-	6444615	6444959	2	307	MSTRG.10764	Potri.005G086400
MSTRG.1078.1	i	0.0399311	-0.109363	Chr01	.	9911941	9912491	1	551	MSTRG.1078	Potri.001G122500
MSTRG.10783.1	x	0.0151601	-0.0118784	Chr05	+	6607704	6607978	1	275	MSTRG.10783	Potri.005G088300
MSTRG.10788.1	i	0.01596	-0.131072	Chr05	.	6638017	6638727	1	711	MSTRG.10788	Potri.005G088900
MSTRG.10794.2	j	0.0680857	-0.016384	Chr05	+	6688181	6689258	2	977	MSTRG.10794	Potri.005G089700
MSTRG.10795.1	x	0.0727986	-0.098304	Chr05	-	6686846	6690617	2	829	MSTRG.10795	Potri.005G089700
MSTRG.10795.2	x	0.119088	-0.049152	Chr05	-	6688967	6690812	2	1095	MSTRG.10795	Potri.005G089700
MSTRG.10821.1	x	0.0237608	-0.0004096	Chr05	+	6945930	6946234	2	261	MSTRG.10821	Potri.005G093000
MSTRG.10861.1	u	0.0379893	-0.126976	Chr05	.	7412561	7413015	1	455	MSTRG.10861	.
MSTRG.10862.1	u	0.0034939	-0.125338	Chr05	.	7411550	7411959	1	410	MSTRG.10862	.
MSTRG.10868.1	i	0.050751	-0.11305	Chr05	+	7449346	7449706	2	222	MSTRG.10868	Potri.005G098200
MSTRG.10869.1	u	0.0471257	-0.0643072	Chr05	.	7498692	7498961	1	270	MSTRG.10869	.
MSTRG.10876.1	i	0.0133865	-0.0004096	Chr05	.	7530284	7530609	1	326	MSTRG.10876	Potri.005G099000
MSTRG.10889.1	i	0.0161104	-0.0004096	Chr05	-	7655870	7656685	2	790	MSTRG.10889	Potri.005G100200
MSTRG.10889.2	i	0.0112191	-0.0004096	Chr05	-	7655870	7656686	3	685	MSTRG.10889	Potri.005G100200
MSTRG.10899.2	j	0.221377	-0.008192	Chr05	+	7756850	7758464	3	1058	MSTRG.10899	Potri.005G101500
MSTRG.10906.1	x	0.0863253	-0.0004096	Chr05	+	7837655	7837881	2	202	MSTRG.10906	Potri.005G102300
MSTRG.10916.1	u	0.00709679	-0.0004096	Chr05	.	7921184	7921502	1	319	MSTRG.10916	.
MSTRG.10917.1	u	0.00970518	-0.032768	Chr05	+	7919044	7919840	1	797	MSTRG.10917	.
MSTRG.10918.1	u	0.00538046	-0.024576	Chr05	.	7920104	7920471	1	368	MSTRG.10918	.
MSTRG.10944.1	u	0.021164	-0.069632	Chr05	.	8181663	8181888	1	226	MSTRG.10944	.
MSTRG.10945.1	u	1.56563e-05	-0.0004096	Chr05	-	8180017	8180218	1	202	MSTRG.10945	.
MSTRG.10946.1	u	0.00776502	-0.0004096	Chr05	.	8182602	8182855	1	254	MSTRG.10946	.
MSTRG.10957.1	i	0.00259871	-0.176538	Chr05	-	8235972	8236203	2	209	MSTRG.10957	Potri.005G108000
MSTRG.10964.1	u	0.0237401	-0.0909312	Chr05	.	8345808	8346530	1	723	MSTRG.10964	.
MSTRG.10992.1	i	0.0247355	-0.0774144	Chr05	.	8589442	8590192	1	751	MSTRG.10992	Potri.005G111900
MSTRG.11.4	j	0.0212823	-0.073728	Chr01	+	125520	126702	2	738	MSTRG.11	Potri.001G001800
MSTRG.11012.1	o	0.0390523	-0.090112	Chr05	+	8742909	8753728	2	287	MSTRG.11012	Potri.005G113800
MSTRG.11014.1	x	0.0113564	-0.131072	Chr05	+	8754125	8762217	2	257	MSTRG.11014	Potri.005G114000
MSTRG.11018.1	x	0.0128563	-0.0004096	Chr05	+	8793507	8793782	2	242	MSTRG.11018	Potri.005G114300
MSTRG.11019.1	u	0.042023	-0.147456	Chr05	-	8849355	8850434	2	436	MSTRG.11019	.
MSTRG.11043.1	i	0.042351	-0.004096	Chr05	-	9061595	9063859	2	2230	MSTRG.11043	Potri.005G117400
MSTRG.11067.1	x	0.0330486	-0.049152	Chr05	+	9390402	9390714	2	283	MSTRG.11067	Potri.005G120600
MSTRG.11077.1	u	0.0131362	-0.065536	Chr05	.	9500808	9501205	1	398	MSTRG.11077	.
MSTRG.11085.1	x	0.0186233	-0.106496	Chr05	+	9588325	9588688	2	203	MSTRG.11085	Potri.005G123000
MSTRG.11104.1	j	0.17653	-0.006144	Chr05	-	9847728	9852538	3	413	MSTRG.11104	Potri.005G125900
MSTRG.11113.1	u	0.0464232	-0.515686	Chr05	.	9993366	9993720	1	355	MSTRG.11113	.
MSTRG.11120.1	x	0.0400811	-0.0004096	Chr05	-	10098818	10099189	2	351	MSTRG.11120	Potri.005G127900
MSTRG.11131.1	o	0.101716	-0.012288	Chr05	+	10169786	10184313	2	700	MSTRG.11131	Potri.005G128700
MSTRG.11142.1	u	0.0134874	-0.065536	Chr05	+	10541008	10541398	2	324	MSTRG.11142	.
MSTRG.11150.1	u	0.015299	-0.049152	Chr05	.	10891084	10891338	1	255	MSTRG.11150	.
MSTRG.11154.1	u	0.00956228	-0.1024	Chr05	-	10954380	10954774	1	395	MSTRG.11154	.
MSTRG.11155.1	u	0.0336278	-0.0118784	Chr05	-	10955845	10956545	1	701	MSTRG.11155	.
MSTRG.11160.1	x	0.00361681	-0.0004096	Chr05	+	10693546	10723879	2	252	MSTRG.11160	Potri.005G132600
MSTRG.11164.1	u	5.65502e-07	-0.165888	Chr05	+	10713351	10713567	1	217	MSTRG.11164	.
MSTRG.11174.1	x	0.132394	-0.128614	Chr05	+	10823483	10832946	2	290	MSTRG.11174	Potri.005G133600
MSTRG.11188.1	i	0.00621569	-0.0004096	Chr05	+	11150494	11151087	1	594	MSTRG.11188	Potri.005G136300
MSTRG.11189.1	u	0.00356526	-0.0004096	Chr05	.	11201924	11202236	1	313	MSTRG.11189	.
MSTRG.11206.1	u	0.0514989	-0.0004096	Chr05	+	11455264	11456207	2	865	MSTRG.11206	.
MSTRG.11221.1	u	0.183302	-0.016384	Chr05	.	11740647	11740859	1	213	MSTRG.11221	.
MSTRG.11228.1	i	0.0691174	-0.012288	Chr05	+	11860506	11861085	2	553	MSTRG.11228	Potri.005G140800
MSTRG.11237.1	u	0.0439587	-0.0004096	Chr05	.	12012921	12013127	1	207	MSTRG.11237	.
MSTRG.11252.1	x	0.00913913	-0.012288	Chr05	+	12171377	12209062	2	233	MSTRG.11252	Potri.005G143400
MSTRG.11261.1	u	0.0176102	-0.0004096	Chr05	.	12662108	12662320	1	213	MSTRG.11261	.
MSTRG.11274.1	u	0.172079	-0.0360448	Chr05	.	12951697	12951933	1	237	MSTRG.11274	.
MSTRG.11283.2	j	0.0383463	-0.0004096	Chr05	-	13058198	13067815	2	1856	MSTRG.11283	Potri.005G148000
MSTRG.11283.3	j	0.0472969	-0.114688	Chr05	-	13065626	13067815	2	1145	MSTRG.11283	Potri.005G148000
MSTRG.11285.1	u	0.0180147	-0.602112	Chr05	.	13176944	13177189	1	246	MSTRG.11285	.
MSTRG.11288.1	u	0.016818	-0.0151552	Chr05	.	13189974	13190525	1	552	MSTRG.11288	.
MSTRG.11291.1	i	0.0208768	-0.0086016	Chr05	.	13235261	13236336	1	1076	MSTRG.11291	Potri.005G148700
MSTRG.11296.1	u	0.0560764	-0.053248	Chr05	-	13425499	13425899	2	373	MSTRG.11296	.
MSTRG.11297.1	u	0.0284119	-0.028672	Chr05	.	13425985	13426394	1	410	MSTRG.11297	.
MSTRG.11318.1	u	0.0145271	-0.0745472	Chr05	.	14924984	14925276	1	293	MSTRG.11318	.
MSTRG.11320.1	x	0.0883753	-0.126976	Chr05	+	14701055	14704087	2	2988	MSTRG.11320	Potri.005G154000
MSTRG.11322.1	u	0.00399039	-0.0520192	Chr05	.	15521221	15521436	1	216	MSTRG.11322	.
MSTRG.1133.2	j	0.0273015	-0.016384	Chr01	+	10462135	10465895	2	647	MSTRG.1133	Potri.001G129500
MSTRG.11344.1	i	0.0255708	-0.049152	Chr05	-	15918643	15919101	2	434	MSTRG.11344	Potri.005G158300
MSTRG.11363.1	u	0.0118908	-0.0004096	Chr05	.	16592341	16592585	1	245	MSTRG.11363	.
MSTRG.11374.1	i	0.0140028	-0.0544768	Chr05	+	16711035	16711785	2	664	MSTRG.11374	Potri.005G162800
MSTRG.11379.1	x	0.0398787	-0.16384	Chr05	+	16796793	16804007	2	281	MSTRG.11379	Potri.005G163500
MSTRG.11381.1	x	1.45524e-05	-0.016384	Chr05	+	16803719	16828545	2	294	MSTRG.11381	Potri.005G163700
MSTRG.11385.1	i	0.00613336	-0.0004096	Chr05	-	16960470	16960799	2	300	MSTRG.11385	Potri.005G164100
MSTRG.11391.1	u	0.00271953	-0.0241664	Chr05	.	17050485	17050687	1	203	MSTRG.11391	.
MSTRG.11396.1	u	0.0202088	-0.0094208	Chr05	+	17090265	17091085	2	724	MSTRG.11396	.
MSTRG.11407.1	x	0.177074	-0.069632	Chr05	+	17373254	17373555	2	271	MSTRG.11407	Potri.005G166700
MSTRG.11418.1	x	0.00635557	-0.0835584	Chr05	-	17956085	17956598	2	298	MSTRG.11418	Potri.005G168700
MSTRG.11422.1	i	0.044718	-0.131072	Chr05	+	17985454	17985689	2	207	MSTRG.11422	Potri.005G168800
MSTRG.1143.1	i	0.0160916	-0.18432	Chr01	-	10522418	10523932	2	1011	MSTRG.1143	Potri.001G130500
MSTRG.11434.1	u	0.0450681	-0.0004096	Chr05	.	18521151	18521373	1	223	MSTRG.11434	.
MSTRG.11441.1	j	0.288509	-0.0200704	Chr05	+	18556023	18560056	3	676	MSTRG.11441	Potri.005G171000
MSTRG.11476.1	x	0.0227521	-0.0577536	Chr05	-	19143688	19143954	2	243	MSTRG.11476	Potri.005G175800
MSTRG.11478.1	x	0.0154591	-0.0004096	Chr05	+	19178710	19178960	2	229	MSTRG.11478	Potri.005G176000
MSTRG.11496.1	x	0.00311976	-0.0954368	Chr05	+	19363120	19369038	2	244	MSTRG.11496	Potri.005G177700
MSTRG.115.1	i	0.0119681	-0.024576	Chr01	-	955140	955685	2	512	MSTRG.115	Potri.001G014000
MSTRG.11501.1	u	0.116413	-0.188416	Chr05	.	19514946	19515221	1	276	MSTRG.11501	.
MSTRG.11502.1	x	0.0219749	-0.045056	Chr05	-	19450777	19451410	2	614	MSTRG.11502	Potri.005G178500
MSTRG.11523.1	x	0.00835612	-0.0004096	Chr05	+	19709691	19732680	2	231	MSTRG.11523	Potri.005G181000
MSTRG.11525.1	u	0.012266	-0.08192	Chr05	-	19761049	19764781	3	732	MSTRG.11525	.
MSTRG.11525.2	u	0.012266	-0.08192	Chr05	-	19761049	19764789	4	806	MSTRG.11525	.
MSTRG.11525.3	u	0.0144259	-0.0004096	Chr05	-	19762688	19764358	2	981	MSTRG.11525	.
MSTRG.11525.4	u	0.0168737	-0.139264	Chr05	-	19762934	19764352	2	1142	MSTRG.11525	.
MSTRG.11546.1	i	0.031314	-0.086016	Chr05	+	19996310	19997002	2	505	MSTRG.11546	Potri.005G183600
MSTRG.11550.1	u	0.0235939	-0.106496	Chr05	.	20135312	20135700	1	389	MSTRG.11550	.
MSTRG.11560.1	o	0.163498	-0.0692224	Chr05	+	20289041	20421391	2	709	MSTRG.11560	Potri.005G185600
MSTRG.11582.1	u	0.00854742	-0.139264	Chr05	.	20561886	20562366	1	481	MSTRG.11582	.
MSTRG.11584.1	x	0.00318205	-0.0004096	Chr05	-	20554225	20554838	2	246	MSTRG.11584	Potri.005G188200
MSTRG.116.1	i	0.0192335	-0.170394	Chr01	.	957067	957410	1	344	MSTRG.116	Potri.001G014000
MSTRG.11618.1	x	0.0303033	-0.016384	Chr05	+	20944438	20946830	3	603	MSTRG.11618	Potri.005G192200
MSTRG.11620.1	u	0.0053483	-0.12247	Chr05	-	20946683	20947942	2	679	MSTRG.11620	.
MSTRG.1163.1	x	0.0286983	-0.0004096	Chr01	-	10685379	10685862	2	369	MSTRG.1163	Potri.001G132900
MSTRG.1166.1	u	0.0333893	-0.04096	Chr01	.	10731991	10732688	1	698	MSTRG.1166	.
MSTRG.11666.1	u	0.0403879	-0.0004096	Chr05	-	21387275	21387910	2	450	MSTRG.11666	.
MSTRG.11667.1	u	1.7319e-05	-0.0004096	Chr05	+	21391161	21391391	1	231	MSTRG.11667	.
MSTRG.11676.3	j	0.0539041	-0.004096	Chr05	+	21492911	21494898	2	1501	MSTRG.11676	Potri.005G199300
MSTRG.11676.4	j	0.0307764	-0.0503808	Chr05	+	21493056	21493897	2	756	MSTRG.11676	Potri.005G199300
MSTRG.1174.1	x	0.0997827	-0.077824	Chr01	+	10784092	10818947	2	230	MSTRG.1174	Potri.001G134500
MSTRG.11740.1	u	0.00705918	-0.0004096	Chr05	+	22168539	22169150	2	275	MSTRG.11740	.
MSTRG.11747.2	j	0.159285	-0.016384	Chr05	+	22205063	22207181	4	1638	MSTRG.11747	Potri.005G207900
MSTRG.1175.1	x	0.0479516	-0.0253952	Chr01	+	10785210	10820208	2	373	MSTRG.1175	Potri.001G134500
MSTRG.11769.1	x	0.012888	-0.0004096	Chr05	+	22363727	22364010	2	229	MSTRG.11769	Potri.005G210000
MSTRG.1177.1	u	0.0975308	-0.0004096	Chr01	.	10793012	10793233	1	222	MSTRG.1177	.
MSTRG.11770.1	u	0.0125025	-0.008192	Chr05	+	22397329	22397957	3	452	MSTRG.11770	.
MSTRG.11770.2	u	0.0117666	-0.0004096	Chr05	+	22397338	22397957	2	517	MSTRG.11770	.
MSTRG.11771.1	u	0.0397707	-0.004096	Chr05	+	22398085	22400043	1	1959	MSTRG.11771	.
MSTRG.11771.2	u	0.0210867	-0.004096	Chr05	+	22398233	22399989	2	1667	MSTRG.11771	.
MSTRG.11774.3	j	0.162126	-0.045056	Chr05	-	22440537	22442632	3	1402	MSTRG.11774	Potri.005G210400
MSTRG.1178.1	u	0.00647752	-0.0004096	Chr01	.	10794197	10794532	1	336	MSTRG.1178	.
MSTRG.11793.1	i	0.0143981	-0.0004096	Chr05	.	22575828	22576304	1	477	MSTRG.11793	Potri.005G212300
MSTRG.11798.1	u	0.146871	-0.0004096	Chr05	-	22603821	22604024	1	204	MSTRG.11798	.
MSTRG.11810.1	x	0.0454832	-0.06144	Chr05	-	22713734	22721846	2	255	MSTRG.11810	Potri.005G214200
MSTRG.11817.1	o	0.107093	-0.057344	Chr05	+	22777033	22782466	3	780	MSTRG.11817	Potri.005G214900
MSTRG.11827.2	j	0.187179	-0.0454656	Chr05	+	22906492	22909042	3	2329	MSTRG.11827	Potri.005G216100
MSTRG.11827.3	j	0.465907	-0.0557056	Chr05	+	22906503	22909042	3	1092	MSTRG.11827	Potri.005G216100
MSTRG.11831.1	u	0.0118396	-0.167936	Chr05	+	22932543	22933631	2	617	MSTRG.11831	.
MSTRG.11849.1	x	0.00900861	-0.004096	Chr05	-	23081260	23081594	2	293	MSTRG.11849	Potri.005G218600
MSTRG.11849.2	x	0.00959456	-0.0004096	Chr05	-	23081260	23081594	2	296	MSTRG.11849	Potri.005G218600
MSTRG.11850.1	u	0.0168594	-0.024576	Chr05	+	23088683	23089123	1	441	MSTRG.11850	.
MSTRG.11862.1	j	0.0778775	-0.008192	Chr05	+	23170204	23174255	2	761	MSTRG.11862	Potri.005G219900
MSTRG.11862.2	o	0.151361	-0.090112	Chr05	+	23170205	23174136	2	1101	MSTRG.11862	Potri.005G219900
MSTRG.11867.1	u	0.0229557	-0.026624	Chr05	.	23248472	23248726	1	255	MSTRG.11867	.
MSTRG.11873.1	u	0.121922	-0.24576	Chr05	-	23218015	23223369	2	1035	MSTRG.11873	.
MSTRG.11884.1	i	0.0149969	-0.0004096	Chr05	+	23319549	23320422	2	854	MSTRG.11884	Potri.005G222000
MSTRG.11886.1	u	0.0205493	-0.147456	Chr05	+	23323828	23324767	2	259	MSTRG.11886	.
MSTRG.11893.1	x	0.00254401	-0.0397312	Chr05	+	23359804	23360155	2	289	MSTRG.11893	Potri.005G222700
MSTRG.11900.1	u	0.0355636	-0.113459	Chr05	.	23388068	23388539	1	472	MSTRG.11900	.
MSTRG.11906.1	x	0.0524549	-0.0385024	Chr05	-	23436298	23444277	2	296	MSTRG.11906	Potri.005G223500
MSTRG.11907.1	x	0.00320948	-0.190054	Chr05	-	23436869	23444851	2	299	MSTRG.11907	Potri.005G223500
MSTRG.11917.1	x	0.200488	-0.0290816	Chr05	+	23513456	23513863	3	291	MSTRG.11917	Potri.005G225000
MSTRG.11921.1	i	0.0135049	-0.0004096	Chr05	.	23540213	23540892	1	680	MSTRG.11921	Potri.005G225300
MSTRG.11964.1	u	0.00689041	-0.0004096	Chr05	.	23905706	23905993	1	288	MSTRG.11964	.
MSTRG.11966.1	x	0.0345792	-0.012288	Chr05	+	23908629	23908938	2	280	MSTRG.11966	Potri.005G230500
MSTRG.11967.1	x	0.0973808	-0.028672	Chr05	+	23910022	23910324	2	271	MSTRG.11967	Potri.005G230500
MSTRG.11972.1	x	0.0100031	-0.04096	Chr05	-	23965433	23965978	2	516	MSTRG.11972	Potri.005G231000
MSTRG.11977.1	u	0.00783262	-0.0004096	Chr05	.	24024398	24025106	1	709	MSTRG.11977	.
MSTRG.11995.1	x	0.0482075	-0.262144	Chr05	-	24175915	24176176	2	224	MSTRG.11995	Potri.005G234000
MSTRG.1200.1	u	0.130208	-0.0331776	Chr01	+	11020453	11021292	2	389	MSTRG.1200	.
MSTRG.12023.1	u	0.028274	-0.0004096	Chr05	-	24375929	24377030	2	290	MSTRG.12023	.
MSTRG.12035.1	u	0.0307762	-0.0516096	Chr05	.	24523702	24523979	1	278	MSTRG.12035	.
MSTRG.1205.1	i	0.0285504	-0.0004096	Chr01	+	11009732	11010253	1	522	MSTRG.1205	Potri.001G137200
MSTRG.12053.1	u	0.00371524	-0.0004096	Chr05	.	24642099	24642378	1	280	MSTRG.12053	.
MSTRG.12054.1	u	0.0481948	-0.024576	Chr05	+	24645871	24646207	1	337	MSTRG.12054	.
MSTRG.12057.1	u	0.0733487	-0.0237568	Chr05	.	24669125	24669443	1	319	MSTRG.12057	.
MSTRG.12063.1	x	0.0125042	-0.0352256	Chr05	-	24690535	24691091	2	525	MSTRG.12063	Potri.005G240900
MSTRG.12111.1	u	0.0297544	-0.01024	Chr05	+	25083765	25086368	1	2604	MSTRG.12111	.
MSTRG.12114.1	u	0.121919	-0.200704	Chr05	.	25092094	25092321	1	228	MSTRG.12114	.
MSTRG.1212.3	j	0.0795966	-0.008192	Chr01	-	11110335	11112422	2	949	MSTRG.1212	Potri.001G138100
MSTRG.12123.1	x	0.0922766	-0.385024	Chr05	+	25157138	25157500	2	249	MSTRG.12123	Potri.005G248100
MSTRG.12184.1	u	0.0985653	-0.053248	Chr05	.	25538883	25539103	1	221	MSTRG.12184	.
MSTRG.12197.1	u	0.078796	-0.012288	Chr05	.	25614701	25615021	1	321	MSTRG.12197	.
MSTRG.12198.1	u	0.0884041	-0.0229376	Chr05	.	25615878	25616172	1	295	MSTRG.12198	.
MSTRG.12210.1	u	0.00457253	-0.0004096	Chr05	.	25688093	25688362	1	270	MSTRG.12210	.
MSTRG.12211.1	u	0.154133	-0.0004096	Chr05	.	25688639	25688969	1	331	MSTRG.12211	.
MSTRG.12221.1	u	0.00634162	-0.0544768	Chr05	.	25852732	25852972	1	241	MSTRG.12221	.
MSTRG.12238.1	j	0.0389381	-0.057344	Chr05	+	25828552	25829854	4	651	MSTRG.12238	Potri.005G259800
MSTRG.1225.1	x	0.00703451	-0.024576	Chr01	+	11182321	11182577	2	221	MSTRG.1225	Potri.001G139400
MSTRG.12253.1	u	0.0156474	-0.0565248	Chr06	.	120057	120333	1	277	MSTRG.12253	.
MSTRG.12259.1	u	0.0172252	-0.0004096	Chr06	.	186309	186515	1	207	MSTRG.12259	.
MSTRG.12307.1	x	0.0301409	-0.0995328	Chr06	+	481209	496998	2	208	MSTRG.12307	Potri.006G007200
MSTRG.12309.1	x	0.0209868	-0.0319488	Chr06	+	515411	519490	2	357	MSTRG.12309	Potri.006G007400
MSTRG.12326.1	x	0.0717739	-0.0589824	Chr06	+	652649	663732	2	285	MSTRG.12326	Potri.006G010200
MSTRG.12328.1	x	0.0301022	-0.0786432	Chr06	+	652901	664099	2	403	MSTRG.12328	Potri.006G010200
MSTRG.1237.1	u	0.0135462	-0.086016	Chr01	.	11345903	11346217	1	315	MSTRG.1237	.
MSTRG.12406.1	x	0.0118337	-0.0004096	Chr06	+	1274913	1281425	2	301	MSTRG.12406	Potri.006G019200
MSTRG.12407.1	x	0.005774	-0.0131072	Chr06	+	1275282	1278786	3	274	MSTRG.12407	Potri.006G019300
MSTRG.12407.2	x	0.00523436	-0.237568	Chr06	+	1275282	1281718	3	226	MSTRG.12407	Potri.006G019300
MSTRG.12407.3	x	0.182715	-0.0917504	Chr06	+	1275282	1281718	3	367	MSTRG.12407	Potri.006G019300
MSTRG.12407.4	x	0.176371	-0.0135168	Chr06	+	1275307	1278790	3	394	MSTRG.12407	Potri.006G019300
MSTRG.12407.5	x	0.00555701	-0.14377	Chr06	+	1275319	1278789	4	240	MSTRG.12407	Potri.006G019300
MSTRG.12408.1	x	0.0178993	-0.036864	Chr06	+	1275951	1282331	3	443	MSTRG.12408	Potri.006G019300
MSTRG.1243.2	o	0.0298612	-0.427213	Chr01	+	11426807	11427356	2	286	MSTRG.1243	Potri.001G141800
MSTRG.1245.1	u	0.0828629	-0.0004096	Chr01	.	11453951	11454160	1	210	MSTRG.1245	.
MSTRG.12454.2	x	0.00675355	-0.036864	Chr06	+	1769651	1769975	2	277	MSTRG.12454	Potri.006G025900
MSTRG.12454.3	x	0.00510079	-0.04096	Chr06	+	1769667	1769959	3	245	MSTRG.12454	Potri.006G025900
MSTRG.12455.2	j	0.172024	-0.004096	Chr06	+	1777420	1778791	2	498	MSTRG.12455	Potri.006G026000
MSTRG.1246.1	u	0.0154043	-0.008192	Chr01	.	11455037	11456183	1	1147	MSTRG.1246	.
MSTRG.12475.1	o	0.0521473	-0.0188416	Chr06	-	1858635	2023744	2	208	MSTRG.12475	Potri.006G028600
MSTRG.12476.1	o	0.00885508	-0.0004096	Chr06	-	1858766	2024016	2	349	MSTRG.12476	Potri.006G028600
MSTRG.1249.1	x	4.76926e-07	-0.0479232	Chr01	-	11464464	11464691	2	204	MSTRG.1249	Potri.001G142200
MSTRG.12511.1	u	0.0164188	-0.139264	Chr06	.	2180750	2181014	1	265	MSTRG.12511	.
MSTRG.12538.1	u	0.0195356	-0.065536	Chr06	.	2446722	2446993	1	272	MSTRG.12538	.
MSTRG.12548.1	u	0.0898539	-0.036864	Chr06	+	2497517	2498683	3	1054	MSTRG.12548	.
MSTRG.12549.1	j	0.0289206	-0.073728	Chr06	+	2498998	2504853	2	421	MSTRG.12549	Potri.006G036600
MSTRG.12554.1	j	0.168294	-0.057344	Chr06	+	2605070	2608679	3	1728	MSTRG.12554	Potri.006G037500
MSTRG.12558.2	o	0.0705028	-0.0454656	Chr06	+	2657604	2658455	2	652	MSTRG.12558	Potri.006G038000
MSTRG.12559.1	o	0.0309086	-0.006144	Chr06	+	2666164	2667448	2	1124	MSTRG.12559	Potri.006G038100
MSTRG.12571.1	i	0.00274082	-0.0004096	Chr06	.	2796605	2796861	1	257	MSTRG.12571	Potri.006G039400
MSTRG.12582.1	x	0.0247791	-0.0053248	Chr06	+	2873344	2873670	2	283	MSTRG.12582	Potri.006G040500
MSTRG.12589.2	j	0.137451	-0.008192	Chr06	-	2957479	2960642	8	908	MSTRG.12589	Potri.006G041300
MSTRG.12589.4	j	0.00542572	-0.114688	Chr06	-	2958294	2960642	3	746	MSTRG.12589	Potri.006G041300
MSTRG.12590.1	x	0.00662432	-0.0004096	Chr06	+	2959262	2960489	2	266	MSTRG.12590	Potri.006G041300
MSTRG.126.1	u	0.00507933	-0.0004096	Chr01	.	1204228	1204452	1	225	MSTRG.126	.
MSTRG.1261.1	i	0.00368399	-0.086016	Chr01	+	11645474	11645751	2	257	MSTRG.1261	Potri.001G143400
MSTRG.12611.1	x	0.0360012	-0.024576	Chr06	+	3119327	3119625	2	278	MSTRG.12611	Potri.006G043700
MSTRG.1262.2	j	0.0219202	-0.0589824	Chr01	+	11668807	11671202	2	2233	MSTRG.1262	Potri.001G143600
MSTRG.12639.1	o	0.175402	-0.167936	Chr06	+	3350320	3441250	2	299	MSTRG.12639	Potri.006G048000
MSTRG.12653.1	x	0.0261036	-0.141312	Chr06	+	3479020	3479505	2	297	MSTRG.12653	Potri.006G048600
MSTRG.12659.1	u	0.0127216	-0.0004096	Chr06	.	3575920	3576173	1	254	MSTRG.12659	.
MSTRG.12674.1	i	0.0140665	-0.126976	Chr06	-	3655354	3655710	2	319	MSTRG.12674	Potri.006G050700
MSTRG.12702.1	u	2.90418e-06	-0.02048	Chr06	-	3926505	3926846	1	342	MSTRG.12702	.
MSTRG.12721.1	x	0.00892974	-0.036864	Chr06	+	4097421	4097801	2	300	MSTRG.12721	Potri.006G056300
MSTRG.12726.1	x	0.0227951	-0.187597	Chr06	+	4137307	4137979	2	648	MSTRG.12726	Potri.006G056800
MSTRG.12735.1	x	0.0104793	-0.0892928	Chr06	-	4223494	4229445	2	274	MSTRG.12735	Potri.006G057900
MSTRG.12735.2	x	0.010605	-0.0004096	Chr06	-	4223494	4229392	2	221	MSTRG.12735	Potri.006G057900
MSTRG.12737.1	x	1.8181e-05	-0.0004096	Chr06	-	4224060	4230004	2	267	MSTRG.12737	Potri.006G057900
MSTRG.12738.1	x	0.00495581	-0.0221184	Chr06	-	4224567	4230591	2	351	MSTRG.12738	Potri.006G057900
MSTRG.12738.2	x	0.00521059	-0.0221184	Chr06	-	4224567	4230591	2	351	MSTRG.12738	Potri.006G057900
MSTRG.12738.3	x	0.00602205	-0.0221184	Chr06	-	4224584	4230577	2	320	MSTRG.12738	Potri.006G057900
MSTRG.12746.1	x	0.00822693	-0.0004096	Chr06	-	4314249	4314503	2	233	MSTRG.12746	Potri.006G059100
MSTRG.12754.1	x	0.02377	-0.0004096	Chr06	+	4352767	4353090	2	262	MSTRG.12754	Potri.006G059700
MSTRG.12762.1	i	0.0269974	-0.04096	Chr06	-	4429386	4430766	2	1341	MSTRG.12762	Potri.006G060600
MSTRG.12769.1	o	0.0360792	-0.049152	Chr06	+	4473983	4492216	2	1075	MSTRG.12769	Potri.006G061100
MSTRG.12774.1	u	9.07099e-06	-0.0004096	Chr06	.	4557951	4558225	1	275	MSTRG.12774	.
MSTRG.12780.1	x	0.141608	-0.0544768	Chr06	+	4597801	4598437	2	221	MSTRG.12780	Potri.006G062800
MSTRG.1279.1	u	0.217084	-0.045056	Chr01	+	11858384	11859507	1	1124	MSTRG.1279	.
MSTRG.12790.1	u	0.021215	-0.0495616	Chr06	-	4668154	4669978	1	1825	MSTRG.12790	.
MSTRG.12803.1	x	0.00682504	-0.0004096	Chr06	+	4830853	4831219	2	346	MSTRG.12803	Potri.006G065600
MSTRG.12806.1	u	0.0482646	-0.1024	Chr06	+	4861917	4865319	1	3403	MSTRG.12806	.
MSTRG.12806.2	u	0.0725216	-0.004096	Chr06	+	4861917	4863357	2	1298	MSTRG.12806	.
MSTRG.12807.1	u	0.0408253	-0.024576	Chr06	.	4867636	4869001	1	1366	MSTRG.12807	.
MSTRG.12810.1	x	0.0167603	-0.036864	Chr06	+	4884397	4884706	2	242	MSTRG.12810	Potri.006G066000
MSTRG.12812.1	u	0.0233789	-0.055296	Chr06	.	4912310	4913098	1	789	MSTRG.12812	.
MSTRG.12855.1	x	0.0168822	-0.151552	Chr06	-	5352254	5352590	2	315	MSTRG.12855	Potri.006G072100
MSTRG.12867.1	u	0.149246	-0.024576	Chr06	+	5476727	5477007	2	259	MSTRG.12867	.
MSTRG.1288.1	i	0.00657863	-0.0004096	Chr01	-	11938378	11938875	1	498	MSTRG.1288	Potri.001G146600
MSTRG.12896.1	u	0.0181236	-0.045056	Chr06	+	5775778	5776372	2	362	MSTRG.12896	.
MSTRG.12897.1	u	0.0064058	-0.0004096	Chr06	.	5790082	5790394	1	313	MSTRG.12897	.
MSTRG.12899.1	u	0.0240056	-0.012288	Chr06	.	5791792	5792208	1	417	MSTRG.12899	.
MSTRG.12905.1	o	0.0655019	-0.0004096	Chr06	+	5852288	5853979	2	433	MSTRG.12905	Potri.006G077500
MSTRG.1295.1	u	0.117859	-0.0004096	Chr01	+	11980049	11980346	2	276	MSTRG.1295	.
MSTRG.12953.1	i	0.0115999	-0.049152	Chr06	+	6292419	6292880	2	401	MSTRG.12953	Potri.006G083300
MSTRG.12962.1	x	0.0203919	-0.176538	Chr06	-	6313424	6313736	2	289	MSTRG.12962	Potri.006G083500
MSTRG.1297.1	x	0.0296541	-0.0094208	Chr01	+	11975129	11975795	3	444	MSTRG.1297	Potri.001G147200
MSTRG.12978.1	u	0.00620439	-0.14336	Chr06	.	6517110	6517574	1	465	MSTRG.12978	.
MSTRG.13001.1	u	0.0675839	-0.0004096	Chr06	.	6799774	6800440	1	667	MSTRG.13001	.
MSTRG.13005.1	o	0.151327	-0.036864	Chr06	+	6743275	6768361	2	279	MSTRG.13005	Potri.006G088700
MSTRG.13032.1	x	0.0678965	-0.016384	Chr06	-	7041693	7041950	2	229	MSTRG.13032	Potri.006G092300
MSTRG.1304.1	u	0.00873646	-0.0028672	Chr01	.	12018798	12019041	1	244	MSTRG.1304	.
MSTRG.13051.1	u	0.00838313	-0.290816	Chr06	.	7195748	7196187	1	440	MSTRG.13051	.
MSTRG.13054.1	u	0.0315938	-0.126976	Chr06	.	7201623	7201824	1	202	MSTRG.13054	.
MSTRG.13082.1	x	0.0179375	-0.0106496	Chr06	-	7404787	7419606	3	393	MSTRG.13082	Potri.006G096900
MSTRG.13098.1	u	0.0766335	-0.0004096	Chr06	.	7681098	7681365	1	268	MSTRG.13098	.
MSTRG.13112.1	u	0.00349421	-0.119603	Chr06	.	7763164	7763421	1	258	MSTRG.13112	.
MSTRG.13118.1	j	0.102213	-0.0483328	Chr06	+	7869998	7873132	5	1075	MSTRG.13118	Potri.006G101900
MSTRG.13118.2	j	0.0747648	-0.0483328	Chr06	+	7869998	7873132	6	906	MSTRG.13118	Potri.006G101900
MSTRG.13119.1	u	0.0191906	-0.0888832	Chr06	-	7872756	7873373	1	618	MSTRG.13119	.
MSTRG.13119.2	u	0.00366259	-0.0888832	Chr06	-	7872756	7873155	2	339	MSTRG.13119	.
MSTRG.1312.1	x	0.0104259	-0.032768	Chr01	-	12049421	12050754	2	1239	MSTRG.1312	Potri.001G148100
MSTRG.13123.1	j	0.0389394	-0.090112	Chr06	-	7914588	7916210	3	1085	MSTRG.13123	Potri.006G102300
MSTRG.13135.1	u	0.139045	-0.0004096	Chr06	.	8034926	8035230	1	305	MSTRG.13135	.
MSTRG.13136.1	u	0.0219234	-0.053248	Chr06	+	8052170	8054193	1	2024	MSTRG.13136	.
MSTRG.13176.1	o	0.0658098	-0.0159744	Chr06	-	8492748	8503195	2	347	MSTRG.13176	Potri.006G108900
MSTRG.13176.2	o	0.0633261	-0.0172032	Chr06	-	8492748	8503195	2	473	MSTRG.13176	Potri.006G108900
MSTRG.13176.3	o	0.0508259	-0.0172032	Chr06	-	8492748	8503195	2	472	MSTRG.13176	Potri.006G108900
MSTRG.1319.1	x	0.0516589	-0.0004096	Chr01	-	12272408	12278871	3	645	MSTRG.1319	Potri.001G148900
MSTRG.1319.2	x	0.0281121	-0.016384	Chr01	-	12272425	12278881	3	791	MSTRG.1319	Potri.001G148900
MSTRG.13193.1	u	0.0630647	-0.004096	Chr06	.	8621083	8621529	1	447	MSTRG.13193	.
MSTRG.13197.1	u	0.0128857	-0.0933888	Chr06	.	8623861	8624397	1	537	MSTRG.13197	.
MSTRG.1322.1	i	0.0292737	-0.0249856	Chr01	.	12301262	12302206	1	945	MSTRG.1322	Potri.001G149200
MSTRG.13221.1	u	0.0189826	-0.02048	Chr06	.	8832427	8833406	1	980	MSTRG.13221	.
MSTRG.13222.1	x	0.0197863	-0.0004096	Chr06	+	8824116	8827857	2	729	MSTRG.13222	Potri.006G113400
MSTRG.1323.1	i	0.0784328	-0.06144	Chr01	+	12303605	12304565	2	547	MSTRG.1323	Potri.001G149200
MSTRG.13232.1	u	0.0226516	-0.012288	Chr06	+	8901126	8901439	1	314	MSTRG.13232	.
MSTRG.13278.1	x	0.0117603	-0.0004096	Chr06	-	9412779	9413172	2	290	MSTRG.13278	Potri.006G119100
MSTRG.13280.1	x	0.0516903	-0.012288	Chr06	+	9416437	9416756	2	266	MSTRG.13280	Potri.006G119200
MSTRG.13302.1	u	0.00959053	-0.0004096	Chr06	.	9712947	9713541	1	595	MSTRG.13302	.
MSTRG.13308.1	u	0.0518601	-0.1024	Chr06	.	9776473	9776847	1	375	MSTRG.13308	.
MSTRG.13318.1	x	0.043668	-0.0004096	Chr06	+	9859802	9860214	2	270	MSTRG.13318	Potri.006G123300
MSTRG.13330.2	o	0.0323419	-0.0004096	Chr06	+	9980054	9980640	2	559	MSTRG.13330	Potri.006G124300
MSTRG.13333.1	o	0.00394552	-0.0004096	Chr06	-	9998449	10009679	2	201	MSTRG.13333	Potri.006G124600
MSTRG.13334.1	o	0.00656022	-0.0475136	Chr06	-	9999192	10010112	2	234	MSTRG.13334	Potri.006G124600
MSTRG.13344.1	u	0.00795726	-0.0221184	Chr06	.	10173871	10174570	1	700	MSTRG.13344	.
MSTRG.13345.1	u	0.0319849	-0.0970752	Chr06	.	10177061	10177333	1	273	MSTRG.13345	.
MSTRG.13355.1	u	0.0551597	-0.0299008	Chr06	.	10392360	10392925	1	566	MSTRG.13355	.
MSTRG.13356.1	u	0.00480509	-0.0090112	Chr06	.	10393982	10394199	1	218	MSTRG.13356	.
MSTRG.13357.1	u	0.024191	-0.114688	Chr06	.	10410546	10411049	1	504	MSTRG.13357	.
MSTRG.13361.1	u	0.00957884	-0.02048	Chr06	.	10453827	10454617	1	791	MSTRG.13361	.
MSTRG.13375.1	x	0.0455908	-0.172032	Chr06	+	10534892	10535626	1	735	MSTRG.13375	Potri.006G129100
MSTRG.13381.1	u	0.145608	-0.0196608	Chr06	+	10646236	10646805	1	570	MSTRG.13381	.
MSTRG.13386.1	i	0.029354	-0.004096	Chr06	+	10713925	10715948	2	1903	MSTRG.13386	Potri.006G130700
MSTRG.13389.1	x	0.00924268	-0.049152	Chr06	-	10728995	10729539	2	232	MSTRG.13389	Potri.006G130900
MSTRG.13389.2	x	0.0259959	-0.150733	Chr06	-	10729130	10729504	2	297	MSTRG.13389	Potri.006G130900
MSTRG.13409.1	i	0.0101513	-0.0004096	Chr06	.	10904254	10904531	1	278	MSTRG.13409	Potri.006G132700
MSTRG.13415.1	u	0.0150924	-0.057344	Chr06	.	10985293	10985638	1	346	MSTRG.13415	.
MSTRG.13422.1	i	0.0108592	-0.176128	Chr06	.	11029622	11030007	1	386	MSTRG.13422	Potri.006G134100
MSTRG.13429.1	o	0.0164745	-0.0004096	Chr06	-	11041760	11057318	2	554	MSTRG.13429	Potri.006G134300
MSTRG.13429.2	o	0.0138452	-0.0004096	Chr06	-	11041781	11057315	2	530	MSTRG.13429	Potri.006G134300
MSTRG.13430.1	x	0.00329227	-0.0004096	Chr06	+	11043957	11059342	2	209	MSTRG.13430	Potri.006G134300
MSTRG.13431.1	x	0.0227878	-0.0004096	Chr06	+	11046574	11061453	2	483	MSTRG.13431	Potri.006G134300
MSTRG.13440.2	j	0.0198168	-0.176128	Chr06	+	11220710	11222321	2	308	MSTRG.13440	Potri.006G136100
MSTRG.13443.6	j	0.0103426	-0.004096	Chr06	+	11227049	11228790	3	551	MSTRG.13443	Potri.006G136300
MSTRG.13452.1	x	0.0248673	-0.11223	Chr06	+	11292690	11293046	2	219	MSTRG.13452	Potri.006G136900
MSTRG.13480.1	i	0.0134331	-0.002048	Chr06	.	11796465	11797049	1	585	MSTRG.13480	Potri.006G140500
MSTRG.13482.1	i	0.0943375	-0.053248	Chr06	.	11799762	11800605	1	844	MSTRG.13482	Potri.006G140500
MSTRG.13487.2	j	0.184599	-0.0053248	Chr06	-	11873538	11879412	4	712	MSTRG.13487	Potri.006G141300
MSTRG.1349.1	o	0.129186	-0.0114688	Chr01	-	12599968	12601339	2	379	MSTRG.1349	Potri.001G152700
MSTRG.13497.1	u	0.0802252	-0.077824	Chr06	+	11998963	12000002	2	684	MSTRG.13497	.
MSTRG.13529.4	j	0.043516	-0.065536	Chr06	-	12585010	12586392	3	790	MSTRG.13529	Potri.006G146800
MSTRG.13531.1	x	0.166409	-0.073728	Chr06	+	12537581	12568547	2	283	MSTRG.13531	Potri.006G146600
MSTRG.13538.1	x	0.0309002	-0.110592	Chr06	-	12649150	12649836	2	648	MSTRG.13538	Potri.006G147400
MSTRG.13550.1	x	0.00293774	-0.0806912	Chr06	-	12774469	12775434	2	244	MSTRG.13550	Potri.006G148600
MSTRG.13556.1	x	0.022519	-0.0843776	Chr06	+	12951245	12952159	2	246	MSTRG.13556	Potri.006G149400
MSTRG.13561.1	x	0.0586039	-0.069632	Chr06	-	13010780	13011147	2	299	MSTRG.13561	Potri.006G149800
MSTRG.13589.1	i	0.0184188	-0.0004096	Chr06	+	13647827	13648449	1	623	MSTRG.13589	Potri.006G153300
MSTRG.1360.2	j	0.0402074	-0.032768	Chr01	+	12682288	12701251	5	1068	MSTRG.1360	Potri.001G154000
MSTRG.13615.1	u	0.106497	-0.028672	Chr06	.	14637524	14637798	1	275	MSTRG.13615	.
MSTRG.13625.1	u	0.0269466	-0.04096	Chr06	.	15217656	15217877	1	222	MSTRG.13625	.
MSTRG.13632.1	u	0.0194423	-0.0004096	Chr06	.	16259124	16259409	1	286	MSTRG.13632	.
MSTRG.13635.1	u	0.00918262	-0.06144	Chr06	.	16260218	16260502	1	285	MSTRG.13635	.
MSTRG.13637.1	o	0.0377921	-0.446464	Chr06	+	14681815	15083583	2	299	MSTRG.13637	Potri.006G158300
MSTRG.13638.1	o	0.00754768	-0.0323584	Chr06	+	14682532	15084359	2	358	MSTRG.13638	Potri.006G158300
MSTRG.13638.2	o	0.00942411	-0.0323584	Chr06	+	14682532	15084355	2	354	MSTRG.13638	Potri.006G158300
MSTRG.13640.1	o	0.00458176	-0.086016	Chr06	-	14740502	15093679	2	338	MSTRG.13640	Potri.006G159200
MSTRG.1366.1	i	0.0106336	-0.0004096	Chr01	.	12752580	12752914	1	335	MSTRG.1366	Potri.001G154400
MSTRG.13662.1	u	0.0147355	-0.0004096	Chr06	.	16290739	16290947	1	209	MSTRG.13662	.
MSTRG.13663.1	u	0.0182406	-0.004096	Chr06	.	16289897	16290391	1	495	MSTRG.13663	.
MSTRG.13676.1	i	0.00464134	-0.0004096	Chr06	-	16680533	16680790	2	236	MSTRG.13676	Potri.006G165100
MSTRG.1368.1	i	0.0119567	-0.0004096	Chr01	-	12767385	12767728	2	324	MSTRG.1368	Potri.001G154600
MSTRG.13680.1	u	0.0446883	-0.12288	Chr06	-	16718969	16720350	3	1240	MSTRG.13680	.
MSTRG.13684.1	x	0.0255231	-0.086016	Chr06	+	16820742	16820978	2	205	MSTRG.13684	Potri.006G165700
MSTRG.13692.1	u	0.0233775	-0.049152	Chr06	.	16998744	16999062	1	319	MSTRG.13692	.
MSTRG.13696.1	x	0.0978179	-0.004096	Chr06	-	17084298	17123482	2	461	MSTRG.13696	Potri.006G166800
MSTRG.13697.1	x	0.00947302	-0.02048	Chr06	-	17085600	17124570	2	220	MSTRG.13697	Potri.006G166800
MSTRG.13697.2	x	0.00509761	-0.0004096	Chr06	-	17085892	17124566	2	233	MSTRG.13697	Potri.006G166800
MSTRG.13700.4	j	0.173376	-0.086016	Chr06	+	17157386	17161192	4	643	MSTRG.13700	Potri.006G167000
MSTRG.13717.1	u	0.0452456	-0.0004096	Chr06	.	17573679	17573905	1	227	MSTRG.13717	.
MSTRG.13720.1	x	0.00913632	-0.0004096	Chr06	-	17578786	17596629	2	295	MSTRG.13720	Potri.006G169700
MSTRG.13721.1	x	0.0154427	-0.139264	Chr06	+	17728470	17744364	2	235	MSTRG.13721	Potri.006G170000
MSTRG.13731.1	u	1.67098e-05	-0.208896	Chr06	-	18623934	18624496	2	473	MSTRG.13731	.
MSTRG.13736.1	i	0.0339137	-0.47104	Chr06	-	18773014	18774195	2	1049	MSTRG.13736	Potri.006G175300
MSTRG.13739.1	o	0.0184381	-0.0720896	Chr06	+	18806615	18860257	2	871	MSTRG.13739	Potri.006G175900
MSTRG.13747.4	j	0.00752121	-0.036864	Chr06	-	19046452	19047569	2	337	MSTRG.13747	Potri.006G177100
MSTRG.13749.1	j	0.299539	-0.0004096	Chr06	-	19047637	19050909	3	586	MSTRG.13749	Potri.006G177400
MSTRG.13758.1	u	0.0130508	-0.140083	Chr06	.	19228210	19228421	1	212	MSTRG.13758	.
MSTRG.13762.1	o	0.372203	-0.18432	Chr06	+	19270667	19272826	2	1981	MSTRG.13762	Potri.006G179000
MSTRG.13806.1	x	0.0121229	-0.249856	Chr06	+	19477219	19477472	2	218	MSTRG.13806	Potri.006G180800
MSTRG.13820.1	j	0.0213581	-0.012288	Chr06	-	19647614	19648431	3	479	MSTRG.13820	Potri.006G182300
MSTRG.13825.1	u	0.0101335	-0.0004096	Chr06	-	19678701	19679743	1	1043	MSTRG.13825	.
MSTRG.13827.1	u	0.0222259	-0.0110592	Chr06	.	19736325	19736880	1	556	MSTRG.13827	.
MSTRG.13829.1	u	0.0148901	-0.004096	Chr06	.	19737568	19738239	1	672	MSTRG.13829	.
MSTRG.13830.1	x	0.128602	-0.0483328	Chr06	-	19739960	19740344	2	293	MSTRG.13830	Potri.006G183400
MSTRG.1385.1	x	0.0158315	-0.0098304	Chr01	+	13010803	13011306	2	298	MSTRG.1385	Potri.001G157000
MSTRG.1385.2	x	0.0153167	-0.032768	Chr01	+	13010855	13011301	2	247	MSTRG.1385	Potri.001G157000
MSTRG.13853.1	u	0.0190008	-0.04096	Chr06	.	20020486	20020986	1	501	MSTRG.13853	.
MSTRG.1387.1	j	0.0232054	-0.118784	Chr01	-	12971723	12972832	2	988	MSTRG.1387	Potri.001G156500
MSTRG.1387.4	j	0.0213625	-0.118784	Chr01	-	12971752	12972832	2	963	MSTRG.1387	Potri.001G156500
MSTRG.13879.1	u	0.053938	-0.012288	Chr06	.	20383757	20384352	1	596	MSTRG.13879	.
MSTRG.13897.1	x	0.0193411	-0.04096	Chr06	+	20626512	20627651	2	546	MSTRG.13897	Potri.006G191500
MSTRG.13897.3	x	0.039435	-0.110592	Chr06	+	20626723	20627651	3	527	MSTRG.13897	Potri.006G191500
MSTRG.1390.1	u	0.0058574	-0.049152	Chr01	.	13072796	13073215	1	420	MSTRG.1390	.
MSTRG.13901.1	i	0.0123676	-0.094208	Chr06	-	20672956	20673373	2	392	MSTRG.13901	Potri.006G192000
MSTRG.13910.1	u	0.0297119	-0.08192	Chr06	.	20733003	20733300	1	298	MSTRG.13910	.
MSTRG.13912.1	u	0.0115553	-0.155648	Chr06	.	20813652	20814393	1	742	MSTRG.13912	.
MSTRG.13919.1	x	0.0531769	-0.0004096	Chr06	+	20900494	20901311	2	434	MSTRG.13919	Potri.006G194000
MSTRG.13921.1	x	0.022706	-0.0004096	Chr06	+	20904692	20904937	2	225	MSTRG.13921	Potri.006G194100
MSTRG.13925.1	u	0.133268	-0.0004096	Chr06	+	20950778	20951038	1	261	MSTRG.13925	.
MSTRG.13931.1	u	0.209733	-0.0004096	Chr06	.	21064774	21065060	1	287	MSTRG.13931	.
MSTRG.13933.1	u	0.0352751	-0.0135168	Chr06	.	21136029	21136316	1	288	MSTRG.13933	.
MSTRG.13944.1	i	0.0848713	-0.155648	Chr06	+	21198367	21198749	2	358	MSTRG.13944	Potri.006G196200
MSTRG.13950.1	x	1.59538e-05	-0.0131072	Chr06	+	21251934	21252410	2	382	MSTRG.13950	Potri.006G197000
MSTRG.13967.1	i	0.0152717	-0.199066	Chr06	.	21478871	21479088	1	218	MSTRG.13967	Potri.006G199500
MSTRG.13984.1	i	0.058253	-0.233472	Chr06	+	21650809	21651840	2	955	MSTRG.13984	Potri.006G201400
MSTRG.13987.1	u	0.0660601	-0.0282624	Chr06	.	21676972	21677313	1	342	MSTRG.13987	.
MSTRG.13996.1	u	0.0237033	-0.0004096	Chr06	.	21734900	21735428	1	529	MSTRG.13996	.
MSTRG.14002.1	u	0.085049	-0.0376832	Chr06	.	21856829	21857116	1	288	MSTRG.14002	.
MSTRG.14004.1	u	0.0360345	-0.043008	Chr06	.	21860335	21860710	1	376	MSTRG.14004	.
MSTRG.14010.1	j	0.00534846	-0.179405	Chr06	+	21932935	21935450	2	720	MSTRG.14010	Potri.006G204100
MSTRG.14016.1	u	0.0108092	-0.0004096	Chr06	.	22046441	22046819	1	379	MSTRG.14016	.
MSTRG.14024.1	x	0.00279657	-0.172032	Chr06	+	22089300	22089857	2	338	MSTRG.14024	Potri.006G205300
MSTRG.14036.1	u	0.00478572	-0.0004096	Chr06	.	22267013	22267312	1	300	MSTRG.14036	.
MSTRG.14037.1	u	0.00480394	-0.0004096	Chr06	.	22267606	22267809	1	204	MSTRG.14037	.
MSTRG.14048.1	o	0.0271788	-0.016384	Chr06	-	22335651	22339668	3	2799	MSTRG.14048	Potri.006G208200
MSTRG.14056.1	i	0.0230448	-0.0004096	Chr06	-	22424542	22425814	2	1176	MSTRG.14056	Potri.006G209100
MSTRG.14056.2	i	0.0227862	-0.0004096	Chr06	-	22424566	22425803	2	1045	MSTRG.14056	Potri.006G209100
MSTRG.14071.1	u	0.0425544	-0.192512	Chr06	.	22513105	22513375	1	271	MSTRG.14071	.
MSTRG.14073.1	i	0.0316042	-0.0454656	Chr06	+	22497407	22498936	2	1507	MSTRG.14073	Potri.006G210600
MSTRG.14079.1	x	0.0321362	-0.094208	Chr06	-	22549428	22549758	2	292	MSTRG.14079	Potri.006G211200
MSTRG.14095.1	u	0.00587977	-0.0004096	Chr06	.	22671006	22671219	1	214	MSTRG.14095	.
MSTRG.14113.2	j	0.0395711	-0.0536576	Chr06	-	22838803	22840864	3	1798	MSTRG.14113	Potri.006G214800
MSTRG.14119.1	i	0.0502075	-0.0303104	Chr06	-	22881629	22881902	1	274	MSTRG.14119	Potri.006G215500
MSTRG.14123.1	x	0.00283734	-0.012288	Chr06	-	22882766	22883748	2	363	MSTRG.14123	Potri.006G215600
MSTRG.14141.1	o	0.00601344	-0.06144	Chr06	-	22987251	22989519	2	1922	MSTRG.14141	Potri.006G217300
MSTRG.14153.1	x	0.0663935	-0.008192	Chr06	-	23117415	23118157	2	645	MSTRG.14153	Potri.006G218800
MSTRG.14160.1	u	0.0460578	-0.0991232	Chr06	.	23212652	23212906	1	255	MSTRG.14160	.
MSTRG.14164.1	x	0.182774	-0.0004096	Chr06	-	23198854	23199175	2	298	MSTRG.14164	Potri.006G219600
MSTRG.14199.1	u	0.0486795	-0.0069632	Chr06	.	23594910	23595281	1	372	MSTRG.14199	.
MSTRG.14214.1	u	0.031685	-0.0315392	Chr06	-	23727973	23729761	3	1153	MSTRG.14214	.
MSTRG.14225.1	x	1.56555e-05	-0.101171	Chr06	-	23790841	23803205	2	298	MSTRG.14225	Potri.006G226400
MSTRG.14244.1	x	0.0151949	-0.0831488	Chr06	-	23972871	23975550	3	1808	MSTRG.14244	Potri.006G228900
MSTRG.14244.10	i	0.00294793	-0.0688128	Chr06	-	23973386	23974921	3	823	MSTRG.14244	Potri.006G228900
MSTRG.14244.2	x	0.0169633	-0.10199	Chr06	-	23972871	23975536	3	1045	MSTRG.14244	Potri.006G228900
MSTRG.14244.3	x	0.0173789	-0.0831488	Chr06	-	23972871	23975536	4	1366	MSTRG.14244	Potri.006G228900
MSTRG.14244.4	i	0.0181521	-0.0831488	Chr06	-	23972891	23975536	4	1477	MSTRG.14244	Potri.006G228900
MSTRG.14244.5	i	0.0169633	-0.0831488	Chr06	-	23972891	23975359	5	872	MSTRG.14244	Potri.006G228900
MSTRG.14244.6	i	0.0181421	-0.0831488	Chr06	-	23972891	23975359	5	1157	MSTRG.14244	Potri.006G228900
MSTRG.14244.7	i	0.0146947	-0.0831488	Chr06	-	23972899	23975407	4	1495	MSTRG.14244	Potri.006G228900
MSTRG.14244.8	i	0.0151741	-0.0831488	Chr06	-	23972905	23974921	2	876	MSTRG.14244	Potri.006G228900
MSTRG.14244.9	i	0.0145455	-0.0831488	Chr06	-	23972905	23974045	3	570	MSTRG.14244	Potri.006G228900
MSTRG.14256.1	o	0.002946	-0.191693	Chr06	-	24481514	24499188	2	223	MSTRG.14256	Potri.006G235500
MSTRG.14258.1	o	0.0278411	-0.0884736	Chr06	+	24485432	24503169	2	270	MSTRG.14258	Potri.006G235700
MSTRG.14259.1	o	0.0682593	-0.0016384	Chr06	+	24485783	24503544	2	294	MSTRG.14259	Potri.006G235700
MSTRG.14260.1	o	7.95152e-06	-0.106496	Chr06	+	24485996	24503757	2	294	MSTRG.14260	Potri.006G235700
MSTRG.14261.1	o	0.00272927	-0.0761856	Chr06	+	24486208	24503971	2	296	MSTRG.14261	Potri.006G235700
MSTRG.14262.1	o	0.0173655	-0.0831488	Chr06	+	24486898	24504617	2	252	MSTRG.14262	Potri.006G235700
MSTRG.14263.1	o	0.0164667	-0.0790528	Chr06	+	24487091	24504867	2	312	MSTRG.14263	Potri.006G235700
MSTRG.14286.1	u	0.0155291	-0.290816	Chr06	.	24211775	24212481	1	707	MSTRG.14286	.
MSTRG.14351.1	x	0.0201836	-0.0966656	Chr06	+	24987312	24987621	2	289	MSTRG.14351	Potri.006G241000
MSTRG.14367.1	u	0.0183012	-0.0131072	Chr06	+	25080112	25080908	1	797	MSTRG.14367	.
MSTRG.14369.1	x	0.0177771	-0.0253952	Chr06	+	25084459	25085188	2	501	MSTRG.14369	Potri.006G242300
MSTRG.14369.2	x	0.0106607	-0.0126976	Chr06	+	25084756	25085300	2	517	MSTRG.14369	Potri.006G242300
MSTRG.14401.1	x	0.0221691	-0.0004096	Chr06	-	25389040	25389359	2	293	MSTRG.14401	Potri.006G246900
MSTRG.14403.1	i	0.00260819	-0.110592	Chr06	+	25399183	25399521	2	235	MSTRG.14403	Potri.006G247000
MSTRG.1442.1	x	0.0569671	-0.0004096	Chr01	+	13645016	13645373	2	324	MSTRG.1442	Potri.001G163200
MSTRG.14422.3	j	0.228096	-0.0294912	Chr06	-	25566159	25568432	7	963	MSTRG.14422	Potri.006G249000
MSTRG.14429.3	j	0.0600091	-0.0638976	Chr06	-	25648479	25649490	3	760	MSTRG.14429	Potri.006G250200
MSTRG.14494.1	u	0.0132303	-0.0159744	Chr06	.	26247897	26248634	1	738	MSTRG.14494	.
MSTRG.14507.1	u	0.181033	-0.135168	Chr06	.	26398902	26399205	1	304	MSTRG.14507	.
MSTRG.1451.1	x	0.142651	-0.03072	Chr01	-	13825368	13826039	2	614	MSTRG.1451	Potri.001G164900
MSTRG.14516.5	j	0.0351123	-0.024576	Chr06	-	26374680	26392222	4	516	MSTRG.14516	Potri.006G260900
MSTRG.14533.1	u	0.0956976	-0.004096	Chr06	-	26627370	26630057	2	2662	MSTRG.14533	.
MSTRG.14542.1	u	0.077509	-0.0229376	Chr06	-	26721684	26722928	2	600	MSTRG.14542	.
MSTRG.14554.1	x	0.0383212	-0.0004096	Chr06	-	26798431	26798687	2	228	MSTRG.14554	Potri.006G265600
MSTRG.14569.1	u	0.00791341	-0.02048	Chr06	+	26877411	26878820	2	283	MSTRG.14569	.
MSTRG.14569.2	o	1.87838e-05	-0.0004096	Chr06	+	26877487	26883542	2	214	MSTRG.14569	Potri.006G267200
MSTRG.1457.1	u	0.00454101	-0.0004096	Chr01	+	13966519	13966849	1	331	MSTRG.1457	.
MSTRG.14570.1	x	0.0261596	-0.175309	Chr06	-	26879498	26881181	2	217	MSTRG.14570	Potri.006G267200
MSTRG.14596.1	u	0.0565897	-0.016384	Chr06	-	27178259	27179157	2	787	MSTRG.14596	.
MSTRG.14607.1	u	0.302809	-0.0139264	Chr06	.	27453468	27454767	1	1300	MSTRG.14607	.
MSTRG.14618.1	x	0.124209	-0.045056	Chr06	+	27254260	27261134	2	736	MSTRG.14618	Potri.006G271300
MSTRG.14619.1	x	0.0123464	-0.22528	Chr06	+	27260891	27270730	2	201	MSTRG.14619	Potri.006G271500
MSTRG.14669.1	i	0.0119852	-0.02048	Chr06	+	27734829	27735576	1	748	MSTRG.14669	Potri.006G278700
MSTRG.14682.1	o	0.00805207	-0.0004096	Chr06	+	27827038	27852483	2	470	MSTRG.14682	Potri.006G280500
MSTRG.14683.1	o	0.0100385	-0.210534	Chr06	+	27828192	27853497	2	312	MSTRG.14683	Potri.006G280500
MSTRG.14686.3	j	0.0505432	-0.249856	Chr06	+	27840804	27846517	2	201	MSTRG.14686	Potri.006G280500
MSTRG.14688.4	j	0.114173	-0.049152	Chr06	-	27887331	27888552	2	726	MSTRG.14688	Potri.006G281100
MSTRG.14690.1	o	0.0174455	-0.0004096	Chr06	-	27896592	27902349	2	210	MSTRG.14690	Potri.006G281300
MSTRG.14706.2	i	0.0289137	-0.0892928	Chr07	-	119229	119513	1	285	MSTRG.14706	Potri.007G001600
MSTRG.14711.1	x	0.0115509	-0.229376	Chr07	-	167307	168071	2	606	MSTRG.14711	Potri.007G002200
MSTRG.14711.2	x	0.0195086	-0.34816	Chr07	-	167323	168071	3	481	MSTRG.14711	Potri.007G002200
MSTRG.14713.1	u	0.0520372	-0.0569344	Chr07	-	168830	169310	2	401	MSTRG.14713	.
MSTRG.14721.1	i	0.0271796	-0.086016	Chr07	+	215180	215627	2	426	MSTRG.14721	Potri.007G003100
MSTRG.14725.1	u	0.0091335	-0.02048	Chr07	.	273075	273392	1	318	MSTRG.14725	.
MSTRG.14729.1	i	0.0117185	-0.196608	Chr07	.	259300	259571	1	272	MSTRG.14729	Potri.007G003600
MSTRG.14743.1	i	0.00549124	-0.0004096	Chr07	+	382414	383520	2	440	MSTRG.14743	Potri.007G005300
MSTRG.14808.1	x	0.00847526	-0.0724992	Chr07	-	945901	947867	2	290	MSTRG.14808	Potri.007G011900
MSTRG.14820.1	x	0.0214692	-0.04096	Chr07	+	1008832	1016906	2	509	MSTRG.14820	Potri.007G013000
MSTRG.14832.1	x	0.171154	-0.135168	Chr07	-	1064887	1065356	2	385	MSTRG.14832	Potri.007G014200
MSTRG.14832.2	x	0.17653	-0.335872	Chr07	-	1064897	1065356	3	269	MSTRG.14832	Potri.007G014200
MSTRG.14833.1	x	1.67348e-05	-0.117146	Chr07	-	1065425	1065830	2	300	MSTRG.14833	Potri.007G014200
MSTRG.14849.1	u	0.0126159	-0.0004096	Chr07	.	1252748	1252962	1	215	MSTRG.14849	.
MSTRG.14852.1	u	0.0123846	-0.151552	Chr07	+	1256443	1256692	2	229	MSTRG.14852	.
MSTRG.14853.1	u	0.00427286	-0.032768	Chr07	.	1257280	1257849	1	570	MSTRG.14853	.
MSTRG.14866.1	x	0.0112337	-0.0004096	Chr07	+	1363044	1363496	2	391	MSTRG.14866	Potri.007G017600
MSTRG.1488.1	u	0.00326437	-0.372736	Chr01	.	14429320	14429636	1	317	MSTRG.1488	.
MSTRG.14895.1	x	0.00924521	-0.036864	Chr07	+	1539555	1549303	2	275	MSTRG.14895	Potri.007G020600
MSTRG.14941.1	j	0.164835	-0.0004096	Chr07	-	1950989	1953257	2	1873	MSTRG.14941	Potri.007G026100
MSTRG.14942.1	u	0.00344548	-0.167936	Chr07	+	1950989	1951282	2	269	MSTRG.14942	.
MSTRG.14946.1	u	0.0103258	-0.118784	Chr07	.	2018493	2018722	1	230	MSTRG.14946	.
MSTRG.14969.1	u	4.81354e-07	-0.0364544	Chr07	.	2215973	2216210	1	238	MSTRG.14969	.
MSTRG.14973.1	x	0.00585679	-0.0004096	Chr07	-	2201866	2202163	2	251	MSTRG.14973	Potri.007G029300
MSTRG.1498.1	u	0.0122669	-0.0004096	Chr01	+	14531737	14532040	1	304	MSTRG.1498	.
MSTRG.14980.1	o	0.0115093	-0.0004096	Chr07	-	2249828	2265917	2	277	MSTRG.14980	Potri.007G029800
MSTRG.15000.1	x	0.00752423	-0.0004096	Chr07	+	2463799	2464133	2	307	MSTRG.15000	Potri.007G032500
MSTRG.15007.2	j	0.402598	-0.016384	Chr07	-	2599703	2602192	2	1021	MSTRG.15007	Potri.007G033600
MSTRG.15014.4	j	0.410037	-0.107315	Chr07	+	2650365	2652836	3	1375	MSTRG.15014	Potri.007G034400
MSTRG.15034.1	i	0.0105264	-0.0004096	Chr07	-	2836187	2836729	2	488	MSTRG.15034	Potri.007G036600
MSTRG.15045.1	x	0.0143434	-0.0004096	Chr07	+	3010894	3011736	2	298	MSTRG.15045	Potri.007G038300
MSTRG.15049.1	x	0.00624085	-0.0004096	Chr07	-	3074469	3106464	2	245	MSTRG.15049	Potri.007G039000
MSTRG.15049.2	x	0.0788276	-0.024576	Chr07	-	3074507	3106702	2	445	MSTRG.15049	Potri.007G039000
MSTRG.15049.3	x	0.0255503	-0.0180224	Chr07	-	3074673	3106702	3	248	MSTRG.15049	Potri.007G039000
MSTRG.15050.1	x	0.0176852	-0.0004096	Chr07	-	3092902	3120485	2	403	MSTRG.15050	Potri.007G039100
MSTRG.15050.2	x	0.0145847	-0.0004096	Chr07	-	3092967	3108532	2	446	MSTRG.15050	Potri.007G039000
MSTRG.15051.1	x	0.00837188	-0.0004096	Chr07	-	3106951	3119663	2	355	MSTRG.15051	Potri.007G039100
MSTRG.15064.1	u	0.0380584	-0.0094208	Chr07	+	3373798	3374666	1	869	MSTRG.15064	.
MSTRG.15067.1	x	0.0128171	-0.135168	Chr07	+	3376078	3376406	2	299	MSTRG.15067	Potri.007G041300
MSTRG.1507.1	u	0.032224	-0.0004096	Chr01	-	14588513	14589353	2	303	MSTRG.1507	.
MSTRG.15088.1	u	0.147964	-0.0118784	Chr07	.	3944353	3945203	1	851	MSTRG.15088	.
MSTRG.15093.1	x	0.0198103	-0.0004096	Chr07	+	3874807	3875099	2	273	MSTRG.15093	Potri.007G044400
MSTRG.15097.1	j	0.196353	-0.0344064	Chr07	+	4055949	4057549	3	1065	MSTRG.15097	Potri.007G045600
MSTRG.15103.1	u	0.00641872	-0.0004096	Chr07	.	4244457	4244685	1	229	MSTRG.15103	.
MSTRG.15120.1	x	0.00880508	-0.049152	Chr07	-	4382682	4394287	2	506	MSTRG.15120	Potri.007G047500
MSTRG.15121.1	o	0.0402615	-0.016384	Chr07	+	4383862	4396157	2	1587	MSTRG.15121	Potri.007G047500
MSTRG.15121.2	o	0.0638141	-0.0425984	Chr07	+	4384816	4396207	2	682	MSTRG.15121	Potri.007G047500
MSTRG.15126.1	u	0.00258469	-0.0004096	Chr07	.	4545280	4545536	1	257	MSTRG.15126	.
MSTRG.15127.1	u	0.379777	-0.036864	Chr07	-	4545841	4549142	3	588	MSTRG.15127	.
MSTRG.15134.1	u	0.0666099	-0.125338	Chr07	.	4743968	4744178	1	211	MSTRG.15134	.
MSTRG.15142.1	x	0.0175779	-0.176128	Chr07	-	4932570	4960976	2	222	MSTRG.15142	Potri.007G050600
MSTRG.15144.1	u	0.0687953	-0.166298	Chr07	.	4937837	4938235	1	399	MSTRG.15144	.
MSTRG.15176.1	u	0.0110569	-0.045056	Chr07	+	5611801	5612309	1	509	MSTRG.15176	.
MSTRG.15179.1	u	0.0187486	-0.008192	Chr07	.	5803289	5803495	1	207	MSTRG.15179	.
MSTRG.15185.1	o	0.160579	-0.057344	Chr07	+	5828740	5862301	2	268	MSTRG.15185	Potri.007G055600
MSTRG.15198.1	x	0.169647	-0.192512	Chr07	-	6025232	6025591	2	245	MSTRG.15198	Potri.007G057000
MSTRG.15199.1	u	0.0212138	-0.380928	Chr07	.	6074575	6074825	1	251	MSTRG.15199	.
MSTRG.15212.1	u	0.00999293	-0.018432	Chr07	.	6323894	6324275	1	382	MSTRG.15212	.
MSTRG.15216.1	u	0.00444951	-0.0004096	Chr07	.	6450551	6450762	1	212	MSTRG.15216	.
MSTRG.15221.1	o	0.0538443	-0.0004096	Chr07	+	6542661	6543314	2	532	MSTRG.15221	Potri.007G060700
MSTRG.15222.1	u	0.114052	-0.04096	Chr07	.	6559695	6559957	1	263	MSTRG.15222	.
MSTRG.15233.1	u	0.0049825	-0.053248	Chr07	-	7964038	7972371	2	360	MSTRG.15233	.
MSTRG.15234.1	u	0.00466956	-0.0004096	Chr07	.	7976967	7977313	1	347	MSTRG.15234	.
MSTRG.15235.1	u	0.00471179	-0.0004096	Chr07	.	7981398	7981612	1	215	MSTRG.15235	.
MSTRG.15236.1	u	0.0176935	-0.120422	Chr07	.	7982540	7982862	1	323	MSTRG.15236	.
MSTRG.15249.1	u	0.00773483	-0.114688	Chr07	.	8222527	8223019	1	493	MSTRG.15249	.
MSTRG.15251.1	u	0.00284399	-0.0004096	Chr07	.	8243904	8244161	1	258	MSTRG.15251	.
MSTRG.15255.1	i	0.00521571	-0.0004096	Chr07	+	8287022	8287419	2	212	MSTRG.15255	Potri.007G065400
MSTRG.15260.1	u	0.1802	-0.0335872	Chr07	.	8380617	8380971	1	355	MSTRG.15260	.
MSTRG.15269.1	u	0.0289832	-0.014336	Chr07	.	8816974	8817414	1	441	MSTRG.15269	.
MSTRG.1527.1	i	0.00624205	-0.0004096	Chr01	.	14803988	14804222	1	235	MSTRG.1527	Potri.001G174700
MSTRG.15274.1	u	0.163168	-0.0004096	Chr07	+	8968944	8969360	1	417	MSTRG.15274	.
MSTRG.15286.1	i	0.0224519	-0.006144	Chr07	-	9106003	9106755	2	542	MSTRG.15286	Potri.007G069600
MSTRG.15287.1	u	0.0857796	-0.0004096	Chr07	.	9141172	9141651	1	480	MSTRG.15287	.
MSTRG.15288.1	u	0.00585039	-0.0004096	Chr07	.	9142303	9142646	1	344	MSTRG.15288	.
MSTRG.15309.1	i	0.0570106	-0.008192	Chr07	+	9375018	9376946	1	1929	MSTRG.15309	Potri.007G071600
MSTRG.15315.1	u	0.00548739	-0.04096	Chr07	.	9531368	9531665	1	298	MSTRG.15315	.
MSTRG.15319.1	u	0.012958	-0.183091	Chr07	.	9668421	9668685	1	265	MSTRG.15319	.
MSTRG.15320.1	u	0.0243852	-0.0004096	Chr07	-	9715245	9716215	1	971	MSTRG.15320	.
MSTRG.15322.1	u	0.0191178	-0.04096	Chr07	.	9766466	9766706	1	241	MSTRG.15322	.
MSTRG.15330.1	u	0.00473224	-0.0004096	Chr07	-	9845070	9846386	3	312	MSTRG.15330	.
MSTRG.15354.1	u	0.061727	-0.045056	Chr07	-	10172753	10174871	1	2119	MSTRG.15354	.
MSTRG.15358.1	i	0.0187378	-0.0004096	Chr07	-	10158868	10159364	2	477	MSTRG.15358	Potri.007G077900
MSTRG.15373.1	j	0.0261563	-0.053248	Chr07	-	10392550	10393805	2	1032	MSTRG.15373	Potri.007G080000
MSTRG.15386.1	u	0.0633432	-0.079872	Chr07	.	10527383	10527593	1	211	MSTRG.15386	.
MSTRG.15393.1	u	0.110938	-0.024576	Chr07	.	10599701	10600071	1	371	MSTRG.15393	.
MSTRG.15413.1	u	0.182972	-0.049152	Chr07	.	10800395	10800781	1	387	MSTRG.15413	.
MSTRG.15414.1	u	0.139334	-0.0004096	Chr07	.	10801052	10801379	1	328	MSTRG.15414	.
MSTRG.15420.1	x	0.0226989	-0.0249856	Chr07	+	10905151	10925490	2	253	MSTRG.15420	Potri.007G083900
MSTRG.15432.1	u	0.0141011	-0.169165	Chr07	.	11187307	11187684	1	378	MSTRG.15432	.
MSTRG.15433.1	u	0.0722556	-0.016384	Chr07	.	11188130	11188421	1	292	MSTRG.15433	.
MSTRG.15436.1	u	0.0418814	-0.0823296	Chr07	.	11218662	11218931	1	270	MSTRG.15436	.
MSTRG.15454.1	o	0.00683425	-0.0004096	Chr07	+	11622710	11663026	2	335	MSTRG.15454	Potri.007G090200
MSTRG.15457.1	u	0.00909213	-0.0004096	Chr07	.	11644922	11645157	1	236	MSTRG.15457	.
MSTRG.1551.1	x	0.167112	-0.2048	Chr01	+	15246405	15314369	2	604	MSTRG.1551	Potri.001G178000
MSTRG.15544.1	x	0.0152134	-0.0004096	Chr07	+	12676461	12684164	2	201	MSTRG.15544	Potri.007G101600
MSTRG.15564.1	x	0.0408015	-0.049152	Chr07	+	12911790	12912215	3	264	MSTRG.15564	Potri.007G104500
MSTRG.15578.1	u	0.00384903	-0.0004096	Chr07	.	13022417	13022752	1	336	MSTRG.15578	.
MSTRG.15595.1	i	0.0365437	-0.0004096	Chr07	-	13142583	13143191	1	609	MSTRG.15595	Potri.007G107800
MSTRG.15601.1	x	0.00576994	-0.016384	Chr07	+	13182416	13190343	2	366	MSTRG.15601	Potri.007G108400
MSTRG.15603.1	x	0.423584	-0.028672	Chr07	+	13184194	13200882	3	485	MSTRG.15603	Potri.007G108400
MSTRG.15603.2	x	0.423584	-0.028672	Chr07	+	13184194	13200882	2	485	MSTRG.15603	Potri.007G108400
MSTRG.15611.1	j	0.0639865	-0.012288	Chr07	-	13325709	13326569	2	320	MSTRG.15611	Potri.007G110200
MSTRG.15620.1	x	0.0132706	-0.02048	Chr07	+	13439142	13447625	2	266	MSTRG.15620	Potri.007G111500
MSTRG.15636.2	o	0.087273	-0.0458752	Chr07	+	13558184	13561791	3	644	MSTRG.15636	Potri.007G113400
MSTRG.15636.3	j	0.0129679	-0.0057344	Chr07	+	13558206	13559589	2	804	MSTRG.15636	Potri.007G113400
MSTRG.15638.1	o	0.0440124	-0.0004096	Chr07	+	13561176	13564056	2	972	MSTRG.15638	Potri.007G113600
MSTRG.15658.1	i	0.00998698	-0.0004096	Chr07	-	13720166	13720454	2	269	MSTRG.15658	Potri.007G116300
MSTRG.1568.1	j	0.200194	-0.098304	Chr01	-	15519325	15521548	2	1272	MSTRG.1568	Potri.001G179500
MSTRG.15686.1	x	0.0232892	-0.0004096	Chr07	+	13990919	13991366	2	421	MSTRG.15686	Potri.007G121200
MSTRG.157.1	u	0.0178817	-0.049152	Chr01	+	1521696	1522132	1	437	MSTRG.157	.
MSTRG.15711.2	j	0.0766159	-0.0393216	Chr07	+	14166527	14167486	2	463	MSTRG.15711	Potri.007G124200
MSTRG.15717.1	x	0.0261656	-0.0806912	Chr07	-	14252265	14259022	2	561	MSTRG.15717	Potri.007G126400
MSTRG.15730.1	o	0.0394448	-0.15319	Chr07	-	14221517	14242748	2	267	MSTRG.15730	Potri.007G126100
MSTRG.15754.1	i	0.00788404	-0.0999424	Chr07	+	14445439	14446135	2	659	MSTRG.15754	Potri.007G128500
MSTRG.15770.1	x	0.00452657	-0.0004096	Chr07	+	14525441	14525740	2	258	MSTRG.15770	Potri.007G130400
MSTRG.15781.1	u	0.0172496	-0.057344	Chr07	+	14608534	14608971	2	416	MSTRG.15781	.
MSTRG.15794.1	i	0.0187229	-0.008192	Chr07	-	14741336	14742117	1	782	MSTRG.15794	Potri.007G133900
MSTRG.15805.2	j	0.00288907	-0.0335872	Chr07	-	14786717	14788894	3	494	MSTRG.15805	Potri.007G134900
MSTRG.15812.1	x	1.51412e-05	-0.0028672	Chr07	-	14918696	14919301	3	477	MSTRG.15812	Potri.007G137000
MSTRG.15816.1	o	0.0263109	-0.0446464	Chr07	+	14864306	14888496	4	349	MSTRG.15816	Potri.007G136500
MSTRG.15816.2	x	0.229813	-0.0524288	Chr07	+	14864306	14879905	3	426	MSTRG.15816	Potri.007G135900
MSTRG.15816.3	x	0.11797	-0.0229376	Chr07	+	14873438	14879868	2	350	MSTRG.15816	Potri.007G136400
MSTRG.15817.1	x	0.148233	-0.0372736	Chr07	+	14867741	14873789	2	344	MSTRG.15817	Potri.007G136000
MSTRG.15829.1	j	0.0292173	-0.028672	Chr07	+	14984873	14986523	2	888	MSTRG.15829	Potri.007G138200
MSTRG.15829.2	j	0.059062	-0.028672	Chr07	+	14984921	14986556	3	812	MSTRG.15829	Potri.007G138200
MSTRG.15838.1	x	0.00342766	-0.0004096	Chr07	+	15040699	15040939	2	210	MSTRG.15838	Potri.007G139300
MSTRG.1584.1	j	0.05559	-0.049152	Chr01	-	15840888	15842138	3	976	MSTRG.1584	Potri.001G181700
MSTRG.1584.2	j	0.109696	-0.004096	Chr01	-	15840892	15841791	3	681	MSTRG.1584	Potri.001G181700
MSTRG.15843.1	u	0.0365439	-0.0806912	Chr07	.	15135918	15136434	1	517	MSTRG.15843	.
MSTRG.1585.1	u	0.0145135	-0.0319488	Chr01	.	15847866	15848235	1	370	MSTRG.1585	.
MSTRG.15871.1	x	0.0703661	-0.073728	Chr07	-	15282188	15318364	2	225	MSTRG.15871	Potri.007G143300
MSTRG.15872.1	u	0.0377575	-0.0004096	Chr07	+	15284993	15285999	3	464	MSTRG.15872	.
MSTRG.15878.1	x	0.176768	-0.359629	Chr07	-	15431138	15431385	2	227	MSTRG.15878	Potri.007G144800
MSTRG.15900.1	u	0.158817	-0.0004096	Chr08	.	28205	28438	1	234	MSTRG.15900	.
MSTRG.15901.1	o	0.0589794	-0.22528	Chr08	+	5576	14521	3	290	MSTRG.15901	Potri.008G000400
MSTRG.15901.2	o	0.0738495	-0.22528	Chr08	+	5581	14487	3	255	MSTRG.15901	Potri.008G000400
MSTRG.15901.3	o	0.0550028	-0.462848	Chr08	+	5582	14515	3	244	MSTRG.15901	Potri.008G000400
MSTRG.15905.1	o	5.06855e-07	-0.0004096	Chr08	-	14147	23095	2	233	MSTRG.15905	Potri.008G000600
MSTRG.15912.1	o	0.0963541	-0.008192	Chr08	-	53625	67010	2	237	MSTRG.15912	Potri.008G001600
MSTRG.15933.1	u	0.00745968	-0.0004096	Chr08	.	212868	213334	1	467	MSTRG.15933	.
MSTRG.15934.1	u	0.130261	-0.059392	Chr08	.	213606	213836	1	231	MSTRG.15934	.
MSTRG.15952.1	u	0.0301325	-0.0004096	Chr08	.	314160	314520	1	361	MSTRG.15952	.
MSTRG.15954.1	u	0.0280549	-0.0741376	Chr08	.	320311	320600	1	290	MSTRG.15954	.
MSTRG.1598.1	u	0.0115688	-0.024576	Chr01	.	15996164	15996534	1	371	MSTRG.1598	.
MSTRG.15981.1	i	0.0233136	-0.892928	Chr08	.	543323	543615	1	293	MSTRG.15981	Potri.008G009800
MSTRG.15983.2	j	0.0120523	-0.032768	Chr08	+	560034	562398	4	557	MSTRG.15983	Potri.008G010300
MSTRG.15995.1	x	0.0648972	-0.008192	Chr08	+	648825	649192	2	341	MSTRG.15995	Potri.008G011600
MSTRG.15998.1	i	0.0324287	-0.0004096	Chr08	+	666946	667243	2	272	MSTRG.15998	Potri.008G012000
MSTRG.16008.1	i	0.0284236	-0.118784	Chr08	-	703753	704779	2	905	MSTRG.16008	Potri.008G012600
MSTRG.16008.2	i	0.0409755	-0.090112	Chr08	-	703968	704779	3	666	MSTRG.16008	Potri.008G012600
MSTRG.16015.1	u	0.0469475	-0.0557056	Chr08	.	787971	788551	1	581	MSTRG.16015	.
MSTRG.16020.1	u	0.00600905	-0.0004096	Chr08	+	802764	803291	1	528	MSTRG.16020	.
MSTRG.16036.1	u	0.0215744	-0.0004096	Chr08	.	878082	878448	1	367	MSTRG.16036	.
MSTRG.1604.1	u	0.0422849	-0.0004096	Chr01	.	16090978	16091358	1	381	MSTRG.1604	.
MSTRG.16043.1	x	0.00259099	-0.0966656	Chr08	-	914501	915532	2	204	MSTRG.16043	Potri.008G017300
MSTRG.16045.1	u	0.0095251	-0.053248	Chr08	-	933617	935267	3	474	MSTRG.16045	.
MSTRG.16045.2	u	0.0290115	-0.0065536	Chr08	-	933888	935231	1	1344	MSTRG.16045	.
MSTRG.16078.1	o	1.22662e-05	-0.118784	Chr08	+	1098984	1107685	2	271	MSTRG.16078	Potri.008G021100
MSTRG.16096.1	x	0.00953301	-0.077824	Chr08	-	1182796	1218662	2	256	MSTRG.16096	Potri.008G023500
MSTRG.16097.1	x	0.0903063	-0.159744	Chr08	-	1185500	1200377	2	241	MSTRG.16097	Potri.008G023200
MSTRG.16099.1	x	0.0242548	-0.012288	Chr08	-	1195372	1231856	2	256	MSTRG.16099	Potri.008G023500
MSTRG.16100.1	x	0.00878156	-0.0004096	Chr08	-	1195662	1232095	2	205	MSTRG.16100	Potri.008G023500
MSTRG.16102.1	x	0.010317	-0.0004096	Chr08	-	1206039	1217698	2	292	MSTRG.16102	Potri.008G023400
MSTRG.16105.1	u	0.0161644	-0.024576	Chr08	+	1281532	1281927	1	396	MSTRG.16105	.
MSTRG.16117.1	x	0.0342403	-0.032768	Chr08	+	1367314	1368457	4	680	MSTRG.16117	Potri.008G025900
MSTRG.16126.1	o	0.16039	-0.0729088	Chr08	-	1479177	1501299	2	437	MSTRG.16126	Potri.008G027800
MSTRG.16133.1	x	0.00657483	-0.024576	Chr08	-	1519129	1527061	2	311	MSTRG.16133	Potri.008G028300
MSTRG.16179.2	j	0.0351025	-0.0339968	Chr08	-	1863506	1865334	3	1009	MSTRG.16179	Potri.008G033800
MSTRG.16191.1	u	0.0515423	-0.159744	Chr08	.	1942078	1942564	1	487	MSTRG.16191	.
MSTRG.16232.1	u	0.0695175	-0.0835584	Chr08	.	2313155	2313693	1	539	MSTRG.16232	.
MSTRG.16234.1	i	0.0334302	-0.0147456	Chr08	+	2301682	2302301	2	600	MSTRG.16234	Potri.008G040700
MSTRG.16248.1	x	0.0224623	-0.0229376	Chr08	+	2407242	2408040	3	573	MSTRG.16248	Potri.008G042100
MSTRG.16253.1	x	0.00439911	-0.06144	Chr08	-	2436079	2443848	2	301	MSTRG.16253	Potri.008G042700
MSTRG.16254.1	x	0.0995308	-0.0331776	Chr08	-	2436404	2444285	2	413	MSTRG.16254	Potri.008G042700
MSTRG.16270.1	u	0.0162534	-0.0004096	Chr08	.	2571654	2571911	1	258	MSTRG.16270	.
MSTRG.16299.1	u	0.15637	-0.0004096	Chr08	.	2813029	2813235	1	207	MSTRG.16299	.
MSTRG.16325.2	j	0.041366	-0.0442368	Chr08	+	3016276	3017035	2	605	MSTRG.16325	Potri.008G051100
MSTRG.1634.1	u	0.0143879	-0.012288	Chr01	.	16634933	16635491	1	559	MSTRG.1634	.
MSTRG.16345.2	u	0.00262691	-0.0335872	Chr08	-	3143710	3144131	2	270	MSTRG.16345	.
MSTRG.16356.1	x	0.104447	-0.0905216	Chr08	+	3219673	3226846	2	402	MSTRG.16356	Potri.008G054700
MSTRG.16357.1	x	0.073252	-0.008192	Chr08	+	3220560	3228568	2	1237	MSTRG.16357	Potri.008G054700
MSTRG.16370.1	u	0.0348221	-0.103219	Chr08	+	3312555	3313365	2	770	MSTRG.16370	.
MSTRG.1639.1	u	0.0111147	-0.06144	Chr01	.	16869856	16870153	1	298	MSTRG.1639	.
MSTRG.16405.1	i	0.0187172	-0.0004096	Chr08	.	3599087	3599371	1	285	MSTRG.16405	Potri.008G059800
MSTRG.16418.1	u	0.0535114	-0.06144	Chr08	.	3699787	3700014	1	228	MSTRG.16418	.
MSTRG.16424.1	x	0.0102196	-0.057344	Chr08	+	3720244	3720588	2	309	MSTRG.16424	Potri.008G062000
MSTRG.16425.1	u	0.0137884	-0.0520192	Chr08	.	3737195	3737423	1	229	MSTRG.16425	.
MSTRG.16430.1	u	0.00300138	-0.028672	Chr08	.	3772409	3772635	1	227	MSTRG.16430	.
MSTRG.16472.1	i	0.0250625	-0.0004096	Chr08	+	4103757	4104105	1	349	MSTRG.16472	Potri.008G067500
MSTRG.16473.1	i	0.0176168	-0.0004096	Chr08	+	4104313	4104615	2	254	MSTRG.16473	Potri.008G067500
MSTRG.16479.1	x	0.00965394	-0.012288	Chr08	-	4146252	4146622	2	272	MSTRG.16479	Potri.008G068100
MSTRG.16490.1	u	0.0242167	-0.0004096	Chr08	.	4247077	4247384	1	308	MSTRG.16490	.
MSTRG.16503.1	u	0.0658034	-0.036864	Chr08	-	4372950	4373649	3	262	MSTRG.16503	.
MSTRG.16536.1	u	0.188053	-0.0004096	Chr08	-	4655938	4656672	2	710	MSTRG.16536	.
MSTRG.16541.1	x	0.040605	-0.032768	Chr08	+	4671371	4673085	2	1658	MSTRG.16541	Potri.008G074900
MSTRG.16541.2	x	0.037502	-0.032768	Chr08	+	4671371	4673085	3	1622	MSTRG.16541	Potri.008G074900
MSTRG.1655.1	u	0.0244552	-0.229376	Chr01	.	17170254	17170686	1	433	MSTRG.1655	.
MSTRG.16550.3	j	0.0227253	-0.0282624	Chr08	+	4733557	4735444	2	1485	MSTRG.16550	Potri.008G076100
MSTRG.16551.1	x	0.00352557	-0.0299008	Chr08	-	4734679	4734960	2	253	MSTRG.16551	Potri.008G076100
MSTRG.16560.1	u	0.0130847	-0.04096	Chr08	+	4815803	4817395	2	1405	MSTRG.16560	.
MSTRG.16561.1	j	0.0730672	-0.0192512	Chr08	+	4822345	4824641	2	927	MSTRG.16561	Potri.008G077600
MSTRG.16572.1	x	0.0320753	-0.057344	Chr08	+	4872910	4873252	2	295	MSTRG.16572	Potri.008G078500
MSTRG.16602.1	u	0.00821976	-0.0004096	Chr08	.	5180687	5181088	1	402	MSTRG.16602	.
MSTRG.16607.1	o	0.173519	-0.0004096	Chr08	+	5191731	5210192	2	221	MSTRG.16607	Potri.008G082700
MSTRG.16624.1	x	0.0675177	-0.0118784	Chr08	+	5335616	5336531	2	828	MSTRG.16624	Potri.008G085000
MSTRG.16658.1	o	0.0444259	-0.0192512	Chr08	-	5590028	5614838	2	361	MSTRG.16658	Potri.008G089500
MSTRG.16666.1	u	0.0154639	-0.0004096	Chr08	.	5668377	5668645	1	269	MSTRG.16666	.
MSTRG.16667.1	u	0.0266604	-0.0004096	Chr08	.	5670895	5671128	1	234	MSTRG.16667	.
MSTRG.1668.1	i	0.0571001	-0.0212992	Chr01	.	17509349	17509909	1	561	MSTRG.1668	Potri.001G192500
MSTRG.16680.3	j	0.0100641	-0.057344	Chr08	-	5773139	5773715	2	473	MSTRG.16680	Potri.008G092100
MSTRG.16704.1	u	0.00488955	-0.069632	Chr08	.	5962823	5963244	1	422	MSTRG.16704	.
MSTRG.16733.1	x	0.0387346	-0.036864	Chr08	+	6231149	6231828	2	251	MSTRG.16733	Potri.008G099300
MSTRG.16746.1	o	0.0295229	-0.016384	Chr08	-	6283348	6284204	2	835	MSTRG.16746	Potri.008G100400
MSTRG.16765.1	i	0.0813673	-0.0004096	Chr08	+	6487148	6487461	2	269	MSTRG.16765	Potri.008G102300
MSTRG.16774.1	i	0.00698029	-0.02048	Chr08	+	6559704	6560443	1	740	MSTRG.16774	Potri.008G103400
MSTRG.16787.1	x	0.0041143	-0.0004096	Chr08	+	6680938	6681183	2	202	MSTRG.16787	Potri.008G105300
MSTRG.16821.1	i	0.032406	-0.180224	Chr08	+	6953845	6955430	2	1379	MSTRG.16821	Potri.008G109300
MSTRG.16830.1	u	0.0140291	-0.247398	Chr08	.	7056888	7057528	1	641	MSTRG.16830	.
MSTRG.1684.1	u	0.0133448	-0.178176	Chr01	.	17789964	17790211	1	248	MSTRG.1684	.
MSTRG.16843.1	u	0.171525	-0.0495616	Chr08	.	7153811	7154112	1	302	MSTRG.16843	.
MSTRG.16853.1	u	0.0419102	-0.016384	Chr08	.	7233916	7234283	1	368	MSTRG.16853	.
MSTRG.16854.1	u	0.0187468	-0.016384	Chr08	.	7240092	7241625	1	1534	MSTRG.16854	.
MSTRG.16877.1	u	0.0100764	-0.045056	Chr08	-	7427800	7429070	4	471	MSTRG.16877	.
MSTRG.16878.1	u	8.38786e-06	-0.124109	Chr08	+	7436331	7436679	1	349	MSTRG.16878	.
MSTRG.1688.1	u	0.00800331	-0.024576	Chr01	.	18185043	18185256	1	214	MSTRG.1688	.
MSTRG.16881.1	u	0.0183428	-0.147456	Chr08	.	7446942	7447208	1	267	MSTRG.16881	.
MSTRG.16888.1	x	0.0165827	-0.086016	Chr08	+	7489182	7489453	2	249	MSTRG.16888	Potri.008G116800
MSTRG.16926.3	j	0.120193	-0.028672	Chr08	-	7860648	7861993	2	1011	MSTRG.16926	Potri.008G121000
MSTRG.16961.1	x	0.012325	-0.0761856	Chr08	-	8150226	8154395	3	530	MSTRG.16961	Potri.008G125200
MSTRG.16963.1	u	0.0303149	-0.0094208	Chr08	.	8171370	8171664	1	295	MSTRG.16963	.
MSTRG.16968.1	u	0.105578	-0.160154	Chr08	.	8212438	8213330	1	893	MSTRG.16968	.
MSTRG.16970.1	x	0.0278051	-0.0598016	Chr08	-	8215403	8217928	3	563	MSTRG.16970	Potri.008G126000
MSTRG.16995.1	x	0.00275739	-0.115507	Chr08	-	8370200	8370489	2	266	MSTRG.16995	Potri.008G128600
MSTRG.16996.1	u	0.0609828	-0.1024	Chr08	-	8373724	8374142	1	419	MSTRG.16996	.
MSTRG.170.1	u	0.0212136	-0.004096	Chr01	.	1584340	1585144	1	805	MSTRG.170	.
MSTRG.17005.3	j	0.0617851	-0.116736	Chr08	-	8496207	8496757	3	334	MSTRG.17005	Potri.008G129700
MSTRG.17013.2	j	0.0232502	-0.032768	Chr08	+	8571884	8572873	2	880	MSTRG.17013	Potri.008G130500
MSTRG.17015.1	i	0.0510093	-0.12288	Chr08	+	8585778	8586557	2	757	MSTRG.17015	Potri.008G130600
MSTRG.17023.1	u	0.0379436	-0.15401	Chr08	.	8683109	8683334	1	226	MSTRG.17023	.
MSTRG.17035.1	x	0.0234131	-0.024576	Chr08	-	8788982	8794689	2	647	MSTRG.17035	Potri.008G132800
MSTRG.17036.1	u	0.0258178	-0.02048	Chr08	-	8790065	8795573	2	458	MSTRG.17036	.
MSTRG.1705.1	u	0.0709844	-0.0241664	Chr01	.	19078722	19078954	1	233	MSTRG.1705	.
MSTRG.17069.1	u	0.0354562	-0.0004096	Chr08	.	9073885	9074120	1	236	MSTRG.17069	.
MSTRG.17070.1	u	0.0934974	-0.018432	Chr08	.	9076492	9076709	1	218	MSTRG.17070	.
MSTRG.17071.1	u	0.151779	-0.0884736	Chr08	-	9078557	9078999	2	310	MSTRG.17071	.
MSTRG.17072.1	u	0.145885	-0.0323584	Chr08	.	9089872	9090192	1	321	MSTRG.17072	.
MSTRG.17076.1	i	0.0468024	-0.008192	Chr08	-	9106081	9107234	2	1065	MSTRG.17076	Potri.008G136800
MSTRG.17084.1	i	0.0196743	-0.197837	Chr08	-	9202157	9204359	2	1473	MSTRG.17084	Potri.008G138100
MSTRG.1709.1	u	0.0752214	-0.1024	Chr01	.	19140684	19140931	1	248	MSTRG.1709	.
MSTRG.171.1	u	0.0427868	-0.0086016	Chr01	+	1587968	1588753	2	226	MSTRG.171	.
MSTRG.17100.1	u	0.0423668	-0.0106496	Chr08	.	9421044	9422911	1	1868	MSTRG.17100	.
MSTRG.17102.1	i	0.0254896	-0.126976	Chr08	-	9400825	9401979	1	1155	MSTRG.17102	Potri.008G140700
MSTRG.17125.1	u	0.0689022	-0.0004096	Chr08	.	9588903	9589155	1	253	MSTRG.17125	.
MSTRG.17130.1	x	0.0812994	-0.065536	Chr08	-	9624872	9646203	2	360	MSTRG.17130	Potri.008G143400
MSTRG.17146.1	u	0.0757443	-0.0442368	Chr08	+	9756634	9760153	2	485	MSTRG.17146	.
MSTRG.17154.1	i	0.0169349	-0.0004096	Chr08	-	9793603	9793905	2	215	MSTRG.17154	Potri.008G145500
MSTRG.17166.1	i	0.0229233	-0.0004096	Chr08	-	9870768	9870987	1	220	MSTRG.17166	Potri.008G146600
MSTRG.17176.1	i	0.00482937	-0.14336	Chr08	+	9934503	9934781	1	279	MSTRG.17176	Potri.008G147600
MSTRG.17184.1	x	0.0433647	-0.0290816	Chr08	+	10003728	10004513	2	761	MSTRG.17184	Potri.008G148400
MSTRG.1720.1	u	0.00898269	-0.0004096	Chr01	.	19379482	19379792	1	311	MSTRG.1720	.
MSTRG.17203.1	u	0.145681	-0.008192	Chr08	+	10199442	10199681	1	240	MSTRG.17203	.
MSTRG.17241.1	u	0.0158118	-0.04096	Chr08	.	10475175	10475583	1	409	MSTRG.17241	.
MSTRG.17256.1	i	0.147761	-0.0004096	Chr08	+	10578611	10579457	2	645	MSTRG.17256	Potri.008G156300
MSTRG.17268.1	x	0.0424461	-0.0151552	Chr08	+	10690684	10709634	3	422	MSTRG.17268	Potri.008G157900
MSTRG.17270.1	u	0.00719844	-0.0004096	Chr08	+	10753751	10754329	2	370	MSTRG.17270	.
MSTRG.17271.1	u	0.0180493	-0.356352	Chr08	+	10754545	10755640	1	1096	MSTRG.17271	.
MSTRG.17281.1	x	0.014195	-0.0004096	Chr08	-	10835975	10836332	2	264	MSTRG.17281	Potri.008G159700
MSTRG.17287.1	x	0.0177278	-0.045056	Chr08	-	10898254	10901329	2	291	MSTRG.17287	Potri.008G160600
MSTRG.17298.1	i	0.00556131	-0.0004096	Chr08	.	10980321	10980540	1	220	MSTRG.17298	Potri.008G161500
MSTRG.17306.1	o	0.0159279	-0.1024	Chr08	+	11005650	11027486	2	281	MSTRG.17306	Potri.008G162300
MSTRG.17308.1	o	0.0963759	-0.049152	Chr08	+	11016607	11039895	2	299	MSTRG.17308	Potri.008G162300
MSTRG.17320.1	u	0.0323564	-0.0004096	Chr08	+	11209175	11209631	2	397	MSTRG.17320	.
MSTRG.17322.2	o	0.160196	-0.109363	Chr08	-	11222874	11223606	2	410	MSTRG.17322	Potri.008G164800
MSTRG.17324.1	u	0.0168955	-0.290816	Chr08	+	11230861	11232184	1	1324	MSTRG.17324	.
MSTRG.17334.1	u	0.0486925	-0.14336	Chr08	.	11313583	11313799	1	217	MSTRG.17334	.
MSTRG.1734.1	u	0.00725727	-0.454656	Chr01	-	19720602	19721232	1	631	MSTRG.1734	.
MSTRG.17342.1	u	0.0220351	-0.12288	Chr08	.	11408747	11408994	1	248	MSTRG.17342	.
MSTRG.17349.1	i	0.012377	-0.0004096	Chr08	-	11477541	11477943	2	337	MSTRG.17349	Potri.008G167800
MSTRG.17352.1	o	0.00823091	-0.0004096	Chr08	+	11515503	11516709	2	456	MSTRG.17352	Potri.008G168500
MSTRG.17354.2	j	0.0968095	-0.0045056	Chr08	+	11521139	11522994	2	1680	MSTRG.17354	Potri.008G168700
MSTRG.17359.1	x	0.00386519	-0.0581632	Chr08	+	11533714	11533985	2	245	MSTRG.17359	Potri.008G169000
MSTRG.17366.1	i	0.00426741	-0.0446464	Chr08	+	11603049	11603774	1	726	MSTRG.17366	Potri.008G169900
MSTRG.17366.2	i	1.42798e-05	-0.0008192	Chr08	+	11603125	11603774	2	395	MSTRG.17366	Potri.008G169900
MSTRG.1738.1	u	1.34351e-05	-0.0004096	Chr01	-	19752790	19753319	2	376	MSTRG.1738	.
MSTRG.17401.1	x	0.00909384	-0.0569344	Chr08	+	11954927	11965476	2	227	MSTRG.17401	Potri.008G175000
MSTRG.17402.1	x	0.0057997	-0.053248	Chr08	+	11955716	11966370	2	334	MSTRG.17402	Potri.008G175000
MSTRG.17402.2	x	0.00784073	-0.053248	Chr08	+	11955721	11966259	2	218	MSTRG.17402	Potri.008G175000
MSTRG.17414.1	u	0.0167977	-0.262144	Chr08	+	12046522	12046727	1	206	MSTRG.17414	.
MSTRG.1742.1	x	0.175294	-0.024576	Chr01	+	19758037	19758372	2	306	MSTRG.1742	Potri.001G201800
MSTRG.1742.2	x	0.158702	-0.3072	Chr01	+	19758042	19758372	3	241	MSTRG.1742	Potri.001G201800
MSTRG.17436.1	u	0.0172097	-0.0094208	Chr08	.	12199593	12200241	1	649	MSTRG.17436	.
MSTRG.17441.1	i	0.00959793	-0.0004096	Chr08	+	12211976	12212200	1	225	MSTRG.17441	Potri.008G178900
MSTRG.17448.1	i	0.0191824	-0.004096	Chr08	+	12256210	12257414	2	1116	MSTRG.17448	Potri.008G179700
MSTRG.17448.2	i	0.0050771	-0.0004096	Chr08	+	12256841	12257399	2	528	MSTRG.17448	Potri.008G179700
MSTRG.1746.1	o	0.00610716	-0.0004096	Chr01	-	19906669	19990107	2	404	MSTRG.1746	Potri.001G203100
MSTRG.17472.1	u	0.0566644	-0.008192	Chr08	.	12447310	12447565	1	256	MSTRG.17472	.
MSTRG.17484.1	o	0.0234144	-0.138445	Chr08	+	12593799	12666810	3	433	MSTRG.17484	Potri.008G184200
MSTRG.17485.1	u	0.0737971	-0.032768	Chr08	.	12596620	12597470	1	851	MSTRG.17485	.
MSTRG.17489.1	u	0.00703665	-0.0380928	Chr08	+	12622855	12630260	2	259	MSTRG.17489	.
MSTRG.17501.1	u	0.00792679	-0.065536	Chr08	.	12813882	12814124	1	243	MSTRG.17501	.
MSTRG.17503.1	u	0.00309625	-0.0999424	Chr08	.	12836655	12836906	1	252	MSTRG.17503	.
MSTRG.17504.1	u	1.01551e-06	-0.115917	Chr08	.	12840923	12841127	1	205	MSTRG.17504	.
MSTRG.17514.1	x	0.00584133	-0.0004096	Chr08	-	12943958	12944212	2	219	MSTRG.17514	Potri.008G187600
MSTRG.17515.1	x	0.0664292	-0.0094208	Chr08	-	12946576	12947120	2	427	MSTRG.17515	Potri.008G187600
MSTRG.1752.1	o	5.27668e-07	-0.0004096	Chr01	+	19974919	20225359	2	298	MSTRG.1752	Potri.001G203200
MSTRG.17521.1	u	0.010485	-0.0376832	Chr08	+	13054116	13055315	2	1168	MSTRG.17521	.
MSTRG.17527.1	x	0.0124205	-0.0344064	Chr08	-	13101011	13105338	2	624	MSTRG.17527	Potri.008G189200
MSTRG.17540.3	j	0.199513	-0.120013	Chr08	+	13322054	13322370	2	222	MSTRG.17540	Potri.008G191600
MSTRG.17541.1	i	0.0581374	-0.0012288	Chr08	-	13320884	13321172	2	242	MSTRG.17541	Potri.008G191600
MSTRG.17552.1	x	0.0272524	-0.100762	Chr08	-	13413438	13413770	2	282	MSTRG.17552	Potri.008G192800
MSTRG.17558.1	u	0.0485583	-0.069632	Chr08	.	13486457	13486774	1	318	MSTRG.17558	.
MSTRG.1756.1	o	0.0645891	-0.55296	Chr01	+	20069110	20082568	2	591	MSTRG.1756	Potri.001G203400
MSTRG.17584.1	u	0.00362906	-0.104858	Chr08	+	13752158	13752420	1	263	MSTRG.17584	.
MSTRG.17589.1	i	0.090755	-0.02048	Chr08	-	13765565	13766716	2	1132	MSTRG.17589	Potri.008G197000
MSTRG.1761.1	i	0.0114051	-0.90112	Chr01	+	20226881	20227206	1	326	MSTRG.1761	Potri.001G204000
MSTRG.17625.3	j	0.0293123	-0.0557056	Chr08	-	14267754	14269048	2	624	MSTRG.17625	Potri.008G202100
MSTRG.17630.1	x	0.0119345	-0.199066	Chr08	-	14403315	14421582	2	328	MSTRG.17630	Potri.008G202500
MSTRG.17631.1	x	0.012431	-0.0004096	Chr08	-	14422816	14423109	2	266	MSTRG.17631	Potri.008G202500
MSTRG.17667.1	u	0.00881842	-0.032768	Chr08	+	15122919	15127437	5	523	MSTRG.17667	.
MSTRG.17667.2	u	0.0067069	-0.032768	Chr08	+	15122919	15127526	6	566	MSTRG.17667	.
MSTRG.17667.3	u	0.0143514	-0.032768	Chr08	+	15122919	15127345	5	462	MSTRG.17667	.
MSTRG.17693.1	x	1.79393e-05	-0.0413696	Chr08	+	16684920	16699934	2	282	MSTRG.17693	Potri.008G212500
MSTRG.17693.2	x	0.0128764	-0.135168	Chr08	+	16699443	16699934	2	231	MSTRG.17693	Potri.008G212500
MSTRG.177.1	u	0.0114728	-0.0004096	Chr01	-	1724783	1728409	3	654	MSTRG.177	.
MSTRG.17703.1	u	0.0314883	-0.057344	Chr08	-	17080227	17080514	1	288	MSTRG.17703	.
MSTRG.1771.1	u	0.021024	-0.008192	Chr01	.	20451903	20452184	1	282	MSTRG.1771	.
MSTRG.17736.1	u	4.66332e-07	-0.0086016	Chr08	.	18564449	18564677	1	229	MSTRG.17736	.
MSTRG.17742.1	u	0.0245382	-0.0004096	Chr08	.	18669616	18669918	1	303	MSTRG.17742	.
MSTRG.17751.1	u	0.0686935	-0.0200704	Chr08	.	18853994	18854206	1	213	MSTRG.17751	.
MSTRG.17758.1	u	0.105989	-0.0913408	Chr08	+	19070060	19071464	4	672	MSTRG.17758	.
MSTRG.17760.1	u	0.00740772	-0.0004096	Chr08	.	19108343	19108547	1	205	MSTRG.17760	.
MSTRG.17769.1	x	0.0825223	-0.0004096	Chr08	+	19336138	19360100	2	218	MSTRG.17769	Potri.008G225600
MSTRG.1777.1	j	0.038697	-0.0086016	Chr01	-	20565067	20567456	3	1982	MSTRG.1777	Potri.001G205900
MSTRG.17778.1	i	0.00996948	-0.0311296	Chr08	+	19388499	19389038	1	540	MSTRG.17778	Potri.008G226200
MSTRG.17779.1	i	0.0199427	-0.0004096	Chr08	+	19389984	19390242	1	259	MSTRG.17779	Potri.008G226200
MSTRG.17795.3	j	0.112026	-0.053248	Chr09	+	899138	900842	4	1295	MSTRG.17795	Potri.009G004000
MSTRG.17806.1	u	0.0212551	-0.0004096	Chr09	.	1051879	1052101	1	223	MSTRG.17806	.
MSTRG.17807.1	u	0.0102895	-0.0004096	Chr09	.	1055207	1055450	1	244	MSTRG.17807	.
MSTRG.17809.1	u	0.0365068	-0.0004096	Chr09	.	1073249	1073779	1	531	MSTRG.17809	.
MSTRG.17819.1	u	0.0118654	-0.0008192	Chr09	+	1240664	1241706	2	696	MSTRG.17819	.
MSTRG.17823.1	u	7.02054e-06	-0.0004096	Chr09	.	1358624	1358854	1	231	MSTRG.17823	.
MSTRG.17834.1	x	0.0140111	-0.249856	Chr09	+	1483312	1536639	2	277	MSTRG.17834	Potri.009G008600
MSTRG.17847.1	u	0.0869044	-0.04096	Chr09	+	1881725	1882261	2	418	MSTRG.17847	.
MSTRG.17851.2	j	0.0170193	-0.0569344	Chr09	+	1969210	1969985	2	663	MSTRG.17851	Potri.009G010800
MSTRG.17858.1	i	0.0148744	-0.0004096	Chr09	-	2040095	2040586	2	423	MSTRG.17858	Potri.009G011400
MSTRG.17876.2	o	0.0396454	-0.036864	Chr09	+	2244675	2246163	2	1373	MSTRG.17876	Potri.009G013700
MSTRG.17886.1	x	0.026583	-0.004096	Chr09	-	2518342	2519238	2	877	MSTRG.17886	Potri.009G014700
MSTRG.17901.2	j	0.0523878	-0.008192	Chr09	+	2800408	2802679	3	877	MSTRG.17901	Potri.009G016700
MSTRG.17903.1	i	0.00396547	-0.0004096	Chr09	.	2811629	2811881	1	253	MSTRG.17903	Potri.009G016800
MSTRG.17909.1	i	0.0222013	-0.0004096	Chr09	.	2859324	2859680	1	357	MSTRG.17909	Potri.009G017100
MSTRG.17915.1	x	0.0393899	-0.065536	Chr09	+	2985922	2991423	2	325	MSTRG.17915	Potri.009G018100
MSTRG.17931.1	u	0.184832	-0.02048	Chr09	.	3194640	3194843	1	204	MSTRG.17931	.
MSTRG.17941.1	i	0.0448844	-0.0401408	Chr09	.	3315328	3316112	1	785	MSTRG.17941	Potri.009G021200
MSTRG.17947.4	j	0.0115034	-0.0004096	Chr09	-	3369318	3370454	2	621	MSTRG.17947	Potri.009G021900
MSTRG.17962.1	u	0.00419972	-0.229376	Chr09	+	3533912	3534296	1	385	MSTRG.17962	.
MSTRG.17974.1	u	0.1228	-0.077824	Chr09	.	3629613	3631096	1	1484	MSTRG.17974	.
MSTRG.17992.1	u	0.0325546	-0.176128	Chr09	-	3786330	3786895	2	354	MSTRG.17992	.
MSTRG.17999.1	u	0.0175469	-0.12288	Chr09	+	3830042	3830271	1	230	MSTRG.17999	.
MSTRG.18004.1	u	0.00690474	-0.073728	Chr09	+	3887250	3889713	3	626	MSTRG.18004	.
MSTRG.18032.1	u	0.00858242	-0.077824	Chr09	.	4159265	4159647	1	383	MSTRG.18032	.
MSTRG.18076.1	u	0.0198541	-0.012288	Chr09	.	4613096	4613348	1	253	MSTRG.18076	.
MSTRG.18078.1	x	0.00992854	-0.139264	Chr09	-	4591446	4591767	2	298	MSTRG.18078	Potri.009G036900
MSTRG.18082.1	u	0.0261335	-0.0004096	Chr09	.	4641815	4642108	1	294	MSTRG.18082	.
MSTRG.18098.1	u	0.0084145	-0.0004096	Chr09	+	4752439	4752775	1	337	MSTRG.18098	.
MSTRG.18102.1	j	0.0333216	-0.154829	Chr09	+	4777104	4779687	3	1315	MSTRG.18102	Potri.009G040300
MSTRG.18113.1	x	0.0154054	-0.016384	Chr09	-	4855482	4863260	2	227	MSTRG.18113	Potri.009G041400
MSTRG.18114.1	x	0.0383471	-0.223232	Chr09	-	4857773	4865895	2	261	MSTRG.18114	Potri.009G041400
MSTRG.18134.1	u	0.146357	-0.135168	Chr09	.	5068000	5068309	1	310	MSTRG.18134	.
MSTRG.18144.1	x	0.00647306	-0.086016	Chr09	-	5124320	5124786	2	245	MSTRG.18144	Potri.009G045100
MSTRG.18161.1	u	0.0295874	-0.065536	Chr09	.	5252967	5253640	1	674	MSTRG.18161	.
MSTRG.18173.1	x	0.0111744	-0.0004096	Chr09	+	5315516	5316316	2	738	MSTRG.18173	Potri.009G047800
MSTRG.18188.1	i	0.00331005	-0.233472	Chr09	.	5526290	5526520	1	231	MSTRG.18188	Potri.009G050400
MSTRG.18193.1	i	0.0228224	-0.073728	Chr09	+	5601271	5601578	1	308	MSTRG.18193	Potri.009G051400
MSTRG.1822.1	x	0.0747334	-0.024576	Chr01	+	21245178	21245467	2	254	MSTRG.1822	Potri.001G211700
MSTRG.18269.1	i	0.0160986	-0.155648	Chr09	-	6210555	6210928	2	289	MSTRG.18269	Potri.009G059900
MSTRG.18273.1	o	0.00502066	-0.0004096	Chr09	-	6183232	6196713	2	484	MSTRG.18273	Potri.009G059600
MSTRG.18274.1	o	0.00640698	-0.0004096	Chr09	-	6185293	6198523	2	226	MSTRG.18274	Potri.009G059600
MSTRG.18278.1	u	0.017614	-0.08192	Chr09	.	6249919	6250288	1	370	MSTRG.18278	.
MSTRG.18282.2	j	0.0649959	-0.101171	Chr09	-	6279336	6281104	3	808	MSTRG.18282	Potri.009G060700
MSTRG.18282.4	j	0.287959	-0.036864	Chr09	-	6279446	6281120	2	633	MSTRG.18282	Potri.009G060700
MSTRG.18303.1	x	0.0100597	-0.159744	Chr09	-	6481677	6482087	2	294	MSTRG.18303	Potri.009G063700
MSTRG.18317.1	x	0.0341141	-0.028672	Chr09	-	6532672	6533470	2	760	MSTRG.18317	Potri.009G064600
MSTRG.18332.1	x	0.0177448	-0.130253	Chr09	+	6656887	6668625	2	237	MSTRG.18332	Potri.009G066300
MSTRG.18333.1	x	0.0425621	-0.036864	Chr09	+	6658283	6670016	2	242	MSTRG.18333	Potri.009G066300
MSTRG.18342.1	x	0.00824155	-0.0053248	Chr09	-	6722541	6727689	2	293	MSTRG.18342	Potri.009G067200
MSTRG.18364.1	x	0.0108006	-0.0729088	Chr09	-	6886649	6887302	2	634	MSTRG.18364	Potri.009G069700
MSTRG.18366.1	x	0.0122655	-0.0004096	Chr09	-	6890147	6892514	2	380	MSTRG.18366	Potri.009G069800
MSTRG.18375.1	u	0.0379942	-0.053248	Chr09	.	6988821	6989755	1	935	MSTRG.18375	.
MSTRG.18381.1	o	0.217322	-0.0278528	Chr09	-	7014733	7021190	2	298	MSTRG.18381	Potri.009G071500
MSTRG.18394.1	u	0.00949997	-0.0004096	Chr09	.	7130533	7131865	1	1333	MSTRG.18394	.
MSTRG.18402.1	u	0.00837217	-0.004096	Chr09	-	7205042	7205629	2	493	MSTRG.18402	.
MSTRG.18410.1	x	0.0355398	-0.0004096	Chr09	+	7266160	7273085	2	202	MSTRG.18410	Potri.009G074700
MSTRG.18427.1	o	0.0303299	-0.0565248	Chr09	+	7434180	7435544	3	1166	MSTRG.18427	Potri.009G076800
MSTRG.18434.1	u	0.0772166	-0.026624	Chr09	+	7495738	7498171	1	2434	MSTRG.18434	.
MSTRG.18448.1	u	0.0214433	-0.065536	Chr09	-	7601093	7601706	1	614	MSTRG.18448	.
MSTRG.18453.1	j	0.030895	-0.008192	Chr09	-	7655466	7657432	3	1444	MSTRG.18453	Potri.009G080100
MSTRG.18554.1	x	0.00887117	-0.39936	Chr09	-	8397445	8397847	2	373	MSTRG.18554	Potri.009G092300
MSTRG.18567.1	x	0.0197189	-0.0004096	Chr09	+	8517037	8517327	2	270	MSTRG.18567	Potri.009G094000
MSTRG.18587.1	x	0.00610288	-0.0004096	Chr09	+	8716175	8716407	2	205	MSTRG.18587	Potri.009G097100
MSTRG.18589.2	j	0.0189759	-0.04096	Chr09	+	8721307	8722767	2	376	MSTRG.18589	Potri.009G097200
MSTRG.18624.1	x	0.00447132	-0.0004096	Chr09	+	9320375	9333125	2	511	MSTRG.18624	Potri.009G107400
MSTRG.18624.2	x	0.00455178	-0.0004096	Chr09	+	9320375	9333125	3	511	MSTRG.18624	Potri.009G107400
MSTRG.18624.3	x	0.00455936	-0.0004096	Chr09	+	9324663	9333125	2	479	MSTRG.18624	Potri.009G107400
MSTRG.18625.1	x	0.00500555	-0.25559	Chr09	+	9325672	9333906	2	250	MSTRG.18625	Potri.009G107400
MSTRG.18637.1	x	0.103666	-0.036864	Chr09	-	9387183	9391895	2	262	MSTRG.18637	Potri.009G108600
MSTRG.18638.1	x	0.0620038	-0.0016384	Chr09	-	9387903	9392709	2	353	MSTRG.18638	Potri.009G108600
MSTRG.18642.1	u	0.0101498	-0.0004096	Chr09	.	9416279	9416490	1	212	MSTRG.18642	.
MSTRG.18648.1	u	0.0301856	-0.008192	Chr09	.	9455003	9455349	1	347	MSTRG.18648	.
MSTRG.18650.1	u	0.0137331	-0.0004096	Chr09	+	9455882	9456087	1	206	MSTRG.18650	.
MSTRG.18661.1	u	0.00725349	-0.04096	Chr09	-	8929709	8929925	1	217	MSTRG.18661	.
MSTRG.18662.1	j	0.0630113	-0.282624	Chr09	+	8929709	8932819	4	1538	MSTRG.18662	Potri.009G101000
MSTRG.18667.1	u	0.00955771	-0.055296	Chr09	+	8959288	8959776	1	489	MSTRG.18667	.
MSTRG.1869.1	j	0.0280276	-0.008192	Chr01	-	22460934	22462421	3	571	MSTRG.1869	Potri.001G218900
MSTRG.1869.2	j	0.0181761	-0.024576	Chr01	-	22461017	22462422	3	455	MSTRG.1869	Potri.001G218900
MSTRG.18693.1	x	0.0200806	-0.241664	Chr09	+	9130489	9137175	2	297	MSTRG.18693	Potri.009G104000
MSTRG.18735.2	j	0.0936206	-0.159744	Chr09	-	9613766	9617111	3	1889	MSTRG.18735	Potri.009G112800
MSTRG.18735.3	j	0.184933	-0.012288	Chr09	-	9613828	9616392	4	945	MSTRG.18735	Potri.009G112800
MSTRG.18735.4	j	0.10452	-0.032768	Chr09	-	9613843	9615637	4	575	MSTRG.18735	Potri.009G112800
MSTRG.18736.1	i	0.0192643	-0.0159744	Chr09	+	9613181	9613889	2	684	MSTRG.18736	Potri.009G112800
MSTRG.18739.1	x	0.00836602	-0.118784	Chr09	-	9599497	9608057	2	316	MSTRG.18739	Potri.009G112600
MSTRG.18739.2	x	0.00836602	-0.118784	Chr09	-	9599497	9608057	2	316	MSTRG.18739	Potri.009G112600
MSTRG.18755.1	x	0.0160946	-0.098304	Chr09	-	9718716	9719084	2	297	MSTRG.18755	Potri.009G114800
MSTRG.18822.3	j	0.310771	-0.032768	Chr09	-	10241771	10243021	3	1000	MSTRG.18822	Potri.009G122900
MSTRG.18846.2	j	0.037913	-0.026624	Chr09	+	10425083	10426753	3	746	MSTRG.18846	Potri.009G125800
MSTRG.1887.1	x	0.0168461	-0.0004096	Chr01	-	23024245	23024524	2	237	MSTRG.1887	Potri.001G222300
MSTRG.18924.1	i	0.0076777	-0.012288	Chr09	+	11046251	11046537	2	266	MSTRG.18924	Potri.009G137600
MSTRG.18930.1	u	0.0637953	-0.0200704	Chr09	+	11098229	11099184	3	733	MSTRG.18930	.
MSTRG.18936.1	u	0.139259	-0.016384	Chr09	.	11155501	11155879	1	379	MSTRG.18936	.
MSTRG.18959.1	o	0.00394191	-0.012288	Chr09	-	11283949	11317733	2	249	MSTRG.18959	Potri.009G142100
MSTRG.18960.1	x	0.0105995	-0.0036864	Chr09	+	11284890	11303160	2	355	MSTRG.18960	Potri.009G142100
MSTRG.1898.1	x	0.0111241	-0.0004096	Chr01	+	23147456	23147773	2	281	MSTRG.1898	Potri.001G222900
MSTRG.1898.2	x	0.00985886	-0.0004096	Chr01	+	23147456	23147773	2	284	MSTRG.1898	Potri.001G222900
MSTRG.18986.1	x	0.00442753	-0.049152	Chr09	+	11493478	11493799	2	262	MSTRG.18986	Potri.009G145200
MSTRG.1904.1	u	0.0606465	-0.221184	Chr01	.	23275412	23275892	1	481	MSTRG.1904	.
MSTRG.19048.1	o	0.0593436	-0.0622592	Chr09	-	12006298	12016318	2	252	MSTRG.19048	Potri.009G153700
MSTRG.19082.1	o	0.00984958	-0.073728	Chr09	+	12174887	12184568	2	251	MSTRG.19082	Potri.009G156700
MSTRG.19093.1	x	0.0411945	-0.094208	Chr09	-	12286023	12286350	2	283	MSTRG.19093	Potri.009G158900
MSTRG.19097.1	i	0.00685007	-0.086016	Chr09	+	12316807	12317735	2	821	MSTRG.19097	Potri.009G159300
MSTRG.19136.1	u	0.0327939	-0.016384	Chr09	+	12535869	12536314	1	446	MSTRG.19136	.
MSTRG.1915.1	j	0.0532476	-0.024576	Chr01	+	23588269	23590161	2	670	MSTRG.1915	Potri.001G225400
MSTRG.19158.1	o	0.0266345	-0.032768	Chr09	-	12674485	12689837	2	283	MSTRG.19158	Potri.009G166500
MSTRG.19165.1	u	0.0247405	-0.077824	Chr09	.	12733372	12733963	1	592	MSTRG.19165	.
MSTRG.19166.1	u	0.218781	-0.008192	Chr09	.	12735016	12736213	1	1198	MSTRG.19166	.
MSTRG.19178.1	u	0.0130646	-0.0098304	Chr09	.	12809137	12809513	1	377	MSTRG.19178	.
MSTRG.19179.1	u	0.0178877	-0.1024	Chr09	.	12809893	12810198	1	306	MSTRG.19179	.
MSTRG.1920.1	x	1.82104e-05	-0.103629	Chr01	-	23633925	23634492	2	342	MSTRG.1920	Potri.001G225800
MSTRG.19221.1	u	0.0324774	-0.0004096	Chr10	+	288298	288703	1	406	MSTRG.19221	.
MSTRG.19223.1	i	0.00456438	-0.0155648	Chr10	+	277300	277700	2	286	MSTRG.19223	Potri.010G002900
MSTRG.19235.1	u	0.0079764	-0.0188416	Chr10	.	391068	391378	1	311	MSTRG.19235	.
MSTRG.19240.1	x	0.0447309	-0.02048	Chr10	+	401578	401913	2	259	MSTRG.19240	Potri.010G004500
MSTRG.19242.1	u	0.00733677	-0.038912	Chr10	.	454443	454713	1	271	MSTRG.19242	.
MSTRG.1926.1	o	0.039546	-0.065536	Chr01	+	23788706	23827015	2	747	MSTRG.1926	Potri.001G226600
MSTRG.19266.1	u	0.0802713	-0.0004096	Chr10	.	1611453	1611660	1	208	MSTRG.19266	.
MSTRG.193.1	i	0.0410557	-0.083968	Chr01	+	1824719	1826189	2	1439	MSTRG.193	Potri.001G024300
MSTRG.19312.1	x	0.0219356	-0.0004096	Chr10	-	1667156	1667397	2	209	MSTRG.19312	Potri.010G013100
MSTRG.19314.1	i	0.0199262	-0.032768	Chr10	.	1671188	1671832	1	645	MSTRG.19314	Potri.010G013200
MSTRG.19321.1	u	0.00336965	-0.0004096	Chr10	.	1774517	1774916	1	400	MSTRG.19321	.
MSTRG.19323.1	u	0.0917061	-0.288358	Chr10	.	1800311	1800518	1	208	MSTRG.19323	.
MSTRG.19325.1	u	0.0626467	-0.008192	Chr10	.	1800855	1801070	1	216	MSTRG.19325	.
MSTRG.19333.1	u	0.0205654	-0.0004096	Chr10	+	2526096	2526342	1	247	MSTRG.19333	.
MSTRG.19334.1	u	0.0241404	-0.008192	Chr10	.	2527595	2528328	1	734	MSTRG.19334	.
MSTRG.19336.1	u	0.0219342	-0.0540672	Chr10	.	2530471	2530975	1	505	MSTRG.19336	.
MSTRG.19338.1	o	0.0918609	-0.0012288	Chr10	+	1931366	1977601	3	259	MSTRG.19338	Potri.010G015600
MSTRG.19340.1	u	0.0130989	-0.0393216	Chr10	.	1954939	1955377	1	439	MSTRG.19340	.
MSTRG.19350.2	o	0.00634614	-0.0004096	Chr10	-	2146291	2202499	2	231	MSTRG.19350	Potri.010G016500
MSTRG.19354.1	u	0.00624324	-0.0004096	Chr10	.	2252623	2252866	1	244	MSTRG.19354	.
MSTRG.19363.1	u	0.0148411	-0.123699	Chr10	.	2394394	2394606	1	213	MSTRG.19363	.
MSTRG.19367.1	u	0.0109678	-0.0004096	Chr10	.	2433681	2433906	1	226	MSTRG.19367	.
MSTRG.1938.1	x	0.010121	-0.557056	Chr01	-	24012497	24012786	2	247	MSTRG.1938	Potri.001G228200
MSTRG.19388.1	u	0.0127878	-0.086016	Chr10	+	3379313	3380502	2	484	MSTRG.19388	.
MSTRG.19393.1	x	0.00864803	-0.10281	Chr10	-	3452628	3453054	2	400	MSTRG.19393	Potri.010G024200
MSTRG.19407.1	o	0.12352	-0.12288	Chr10	-	3548283	3597218	2	264	MSTRG.19407	Potri.010G025600
MSTRG.19421.1	x	0.122314	-0.0671744	Chr10	+	2661687	2662393	2	412	MSTRG.19421	Potri.010G019600
MSTRG.19422.1	o	0.0158244	-0.2048	Chr10	+	2664962	2960504	2	297	MSTRG.19422	Potri.010G019800
MSTRG.19424.1	o	0.0309992	-0.0385024	Chr10	+	2667632	2964745	2	268	MSTRG.19424	Potri.010G019800
MSTRG.19433.1	u	0.0185405	-0.0004096	Chr10	+	2788139	2804407	2	204	MSTRG.19433	.
MSTRG.19434.1	u	0.00364896	-0.0004096	Chr10	.	2792865	2793159	1	295	MSTRG.19434	.
MSTRG.19436.1	x	0.00458561	-0.149094	Chr10	+	2910768	2911262	2	228	MSTRG.19436	Potri.010G020700
MSTRG.19438.1	u	0.134338	-0.139264	Chr10	.	2934099	2934389	1	291	MSTRG.19438	.
MSTRG.19451.1	u	0.0247469	-0.159744	Chr10	.	3801024	3801862	1	839	MSTRG.19451	.
MSTRG.19459.1	i	0.0169629	-0.0004096	Chr10	+	3883250	3883635	2	337	MSTRG.19459	Potri.010G027900
MSTRG.19460.3	j	0.0362434	-0.014336	Chr10	+	3888131	3889213	3	866	MSTRG.19460	Potri.010G028000
MSTRG.19473.1	x	0.00427197	-0.0004096	Chr10	-	4096984	4097224	2	212	MSTRG.19473	Potri.010G029200
MSTRG.19475.1	u	0.0721592	-0.106496	Chr10	.	4126602	4126821	1	220	MSTRG.19475	.
MSTRG.19477.1	u	0.0859717	-0.167936	Chr10	+	4108683	4109617	1	935	MSTRG.19477	.
MSTRG.19478.1	u	0.0208677	-0.0004096	Chr10	+	4242462	4246553	2	257	MSTRG.19478	.
MSTRG.19493.1	u	1.90369e-05	-0.0004096	Chr10	.	4741698	4741917	1	220	MSTRG.19493	.
MSTRG.19541.1	j	0.00978787	-0.208896	Chr10	-	6617317	6619997	5	562	MSTRG.19541	Potri.010G039100
MSTRG.19559.1	x	0.0212635	-0.231014	Chr10	+	7113276	7113664	2	238	MSTRG.19559	Potri.010G041100
MSTRG.19568.1	x	0.0169869	-0.0794624	Chr10	+	7239645	7244260	2	392	MSTRG.19568	Potri.010G042100
MSTRG.19578.2	j	0.0462768	-0.069632	Chr10	+	7440762	7448652	3	884	MSTRG.19578	Potri.010G043600
MSTRG.1958.1	u	0.00883605	-0.0004096	Chr01	.	24302129	24302372	1	244	MSTRG.1958	.
MSTRG.19580.1	x	0.0178897	-0.12329	Chr10	+	7444985	7451257	2	296	MSTRG.19580	Potri.010G043800
MSTRG.19581.1	x	0.0549756	-0.01024	Chr10	+	7445558	7452511	2	977	MSTRG.19581	Potri.010G043800
MSTRG.19587.1	i	0.0155765	-0.0004096	Chr10	-	7511991	7512315	2	277	MSTRG.19587	Potri.010G044300
MSTRG.19599.1	u	0.026864	-0.0004096	Chr10	.	7632893	7633112	1	220	MSTRG.19599	.
MSTRG.19603.1	x	0.00386721	-0.0323584	Chr10	+	7655230	7655615	2	297	MSTRG.19603	Potri.010G045800
MSTRG.19614.1	x	0.0316811	-0.136806	Chr10	-	7806673	7806961	2	266	MSTRG.19614	Potri.010G046700
MSTRG.19616.1	u	0.00833917	-0.077824	Chr10	.	7862820	7863139	1	320	MSTRG.19616	.
MSTRG.19626.1	x	0.0534387	-0.114278	Chr10	+	7924548	7939707	2	217	MSTRG.19626	Potri.010G048400
MSTRG.1965.1	u	0.0144384	-0.0004096	Chr01	.	24421949	24422149	1	201	MSTRG.1965	.
MSTRG.19654.1	u	0.0283753	-0.0774144	Chr10	.	8235799	8236039	1	241	MSTRG.19654	.
MSTRG.19669.1	u	0.0111919	-0.0684032	Chr10	.	8368357	8368646	1	290	MSTRG.19669	.
MSTRG.19675.1	x	0.0183448	-0.172032	Chr10	-	8391896	8429225	2	285	MSTRG.19675	Potri.010G053800
MSTRG.19676.1	x	0.0127081	-0.129434	Chr10	-	8392429	8429767	2	294	MSTRG.19676	Potri.010G053800
MSTRG.19688.1	o	0.0108378	-0.0831488	Chr10	+	8535757	8539642	2	1304	MSTRG.19688	Potri.010G055500
MSTRG.19695.1	x	0.0298483	-0.012288	Chr10	+	8574798	8594223	2	290	MSTRG.19695	Potri.010G056400
MSTRG.19696.1	x	0.0132439	-0.137216	Chr10	+	8575398	8594863	2	330	MSTRG.19696	Potri.010G056400
MSTRG.19724.1	o	0.0749859	-0.0004096	Chr10	+	8813334	8893025	2	296	MSTRG.19724	Potri.010G060000
MSTRG.19724.2	o	0.0101028	-0.0577536	Chr10	+	8813334	8913602	2	206	MSTRG.19724	Potri.010G060000
MSTRG.19724.3	o	0.0107662	-0.0872448	Chr10	+	8813336	8885620	2	204	MSTRG.19724	Potri.010G060000
MSTRG.19724.4	o	0.116211	-0.024576	Chr10	+	8818322	8893024	2	247	MSTRG.19724	Potri.010G060000
MSTRG.19725.1	o	0.00664905	-0.08192	Chr10	+	8840190	8915065	2	250	MSTRG.19725	Potri.010G060000
MSTRG.19726.1	o	0.0142133	-0.028672	Chr10	+	8858046	8893393	2	300	MSTRG.19726	Potri.010G060000
MSTRG.19732.1	x	0.00769335	-0.094208	Chr10	+	8951127	8957916	2	473	MSTRG.19732	Potri.010G060800
MSTRG.19737.1	x	0.0107914	-0.016384	Chr10	-	8965592	8981076	2	395	MSTRG.19737	Potri.010G061400
MSTRG.19739.1	x	0.0125882	-0.0905216	Chr10	-	8969873	8980437	2	352	MSTRG.19739	Potri.010G061400
MSTRG.1977.1	x	0.0316564	-0.0647168	Chr01	-	24449152	24472026	2	209	MSTRG.1977	Potri.001G232800
MSTRG.1980.1	x	0.147654	-0.0528384	Chr01	-	24454480	24477035	2	278	MSTRG.1980	Potri.001G232800
MSTRG.1982.2	j	0.249825	-0.0487424	Chr01	+	24506427	24507487	6	621	MSTRG.1982	Potri.001G233100
MSTRG.19828.1	o	0.0360353	-0.258048	Chr10	+	9838796	9879306	3	362	MSTRG.19828	Potri.010G071800
MSTRG.19828.2	o	0.0268982	-0.0749568	Chr10	+	9851639	9879306	2	322	MSTRG.19828	Potri.010G071800
MSTRG.19829.1	o	0.00791882	-0.073728	Chr10	+	9852223	9879858	2	290	MSTRG.19829	Potri.010G071800
MSTRG.19833.1	j	0.0964228	-0.014336	Chr10	-	9964443	9966588	2	1233	MSTRG.19833	Potri.010G073000
MSTRG.19843.1	i	0.00393842	-0.0004096	Chr10	+	10044509	10044897	2	271	MSTRG.19843	Potri.010G074100
MSTRG.19849.1	u	0.00888975	-0.008192	Chr10	.	10159587	10160044	1	458	MSTRG.19849	.
MSTRG.19855.1	x	0.118431	-0.0004096	Chr10	+	10205618	10206252	2	614	MSTRG.19855	Potri.010G075900
MSTRG.19858.1	o	0.0461664	-0.008192	Chr10	+	10229544	10233100	3	938	MSTRG.19858	Potri.010G076300
MSTRG.19873.1	u	0.00756451	-0.036864	Chr10	+	10313838	10314228	2	302	MSTRG.19873	.
MSTRG.19886.1	u	0.00557104	-0.02048	Chr10	.	10653929	10654181	1	253	MSTRG.19886	.
MSTRG.19890.1	o	0.0113585	-0.106496	Chr10	-	10458996	10571087	2	269	MSTRG.19890	Potri.010G079600
MSTRG.19890.2	o	0.0124896	-0.106496	Chr10	-	10458996	10548559	2	251	MSTRG.19890	Potri.010G079600
MSTRG.19890.3	o	0.0105063	-0.118784	Chr10	-	10508444	10571083	2	254	MSTRG.19890	Potri.010G080100
MSTRG.19890.4	o	0.00997607	-0.147456	Chr10	-	10522172	10571084	2	262	MSTRG.19890	Potri.010G080100
MSTRG.19908.1	u	0.0117154	-0.028672	Chr10	.	10859040	10859483	1	444	MSTRG.19908	.
MSTRG.19941.1	o	0.040147	-0.012288	Chr10	-	11112788	11114041	2	1232	MSTRG.19941	Potri.010G086500
MSTRG.19943.1	x	0.176197	-0.385024	Chr10	+	11116001	11116317	2	289	MSTRG.19943	Potri.010G086600
MSTRG.19953.1	i	0.0374184	-0.036864	Chr10	+	11156260	11158181	2	1702	MSTRG.19953	Potri.010G087400
MSTRG.1996.1	j	0.0724208	-0.0360448	Chr01	+	24679198	24680166	2	408	MSTRG.1996	Potri.001G235000
MSTRG.19968.1	x	0.00592169	-0.0004096	Chr10	-	11287073	11287319	2	212	MSTRG.19968	Potri.010G089200
MSTRG.19985.1	i	0.0103552	-0.0004096	Chr10	-	11430933	11431528	2	556	MSTRG.19985	Potri.010G090800
MSTRG.2.1	j	0.0204676	-0.0028672	Chr01	-	8391	12413	3	747	MSTRG.2	Potri.001G000400
MSTRG.2000.1	u	0.053081	-0.04096	Chr01	.	24726862	24727898	1	1037	MSTRG.2000	.
MSTRG.20010.1	x	0.0189547	-0.053248	Chr10	+	11648354	11648966	3	507	MSTRG.20010	Potri.010G093600
MSTRG.20011.1	x	0.0611513	-0.0004096	Chr10	+	11650609	11651010	2	376	MSTRG.20011	Potri.010G093700
MSTRG.20032.1	x	0.0108263	-0.094208	Chr10	-	11826499	11826819	2	300	MSTRG.20032	Potri.010G095800
MSTRG.20037.1	j	0.115709	-0.0339968	Chr10	-	11903305	11908767	6	1643	MSTRG.20037	Potri.010G096900
MSTRG.20047.3	o	0.0250746	-0.0065536	Chr10	+	11993080	11994805	2	1155	MSTRG.20047	Potri.010G098000
MSTRG.20051.1	x	0.0572601	-0.0098304	Chr10	+	11973801	11981137	3	370	MSTRG.20051	Potri.010G097900
MSTRG.20051.2	x	0.0213287	-0.036864	Chr10	+	11973807	11981148	3	361	MSTRG.20051	Potri.010G097900
MSTRG.20051.3	x	0.0260701	-0.0507904	Chr10	+	11973807	11981137	2	247	MSTRG.20051	Potri.010G097900
MSTRG.20052.1	u	0.0189977	-0.0856064	Chr10	.	11982301	11982601	1	301	MSTRG.20052	.
MSTRG.20082.1	x	6.29513e-06	-0.0004096	Chr10	+	12233913	12234207	2	270	MSTRG.20082	Potri.010G100900
MSTRG.20092.1	i	0.0303891	-0.0516096	Chr10	.	12385143	12385465	1	323	MSTRG.20092	Potri.010G102800
MSTRG.20106.1	x	0.00341303	-0.0004096	Chr10	+	12535730	12558164	2	235	MSTRG.20106	Potri.010G105300
MSTRG.20110.1	i	0.0184767	-0.0131072	Chr10	.	12564122	12564519	1	398	MSTRG.20110	Potri.010G105400
MSTRG.20135.3	j	0.425857	-0.0106496	Chr10	-	12812811	12814079	3	912	MSTRG.20135	Potri.010G108800
MSTRG.20147.2	o	0.160103	-0.22528	Chr10	-	12930682	12931072	2	311	MSTRG.20147	Potri.010G110300
MSTRG.20178.1	o	0.0190767	-0.024576	Chr10	-	13191326	13204150	2	881	MSTRG.20178	Potri.010G113600
MSTRG.20189.1	i	0.0151411	-0.0004096	Chr10	+	13303139	13304332	1	1194	MSTRG.20189	Potri.010G114800
MSTRG.20206.1	x	0.0282602	-0.065536	Chr10	-	13482863	13484939	2	470	MSTRG.20206	Potri.010G117100
MSTRG.20214.1	u	0.0651964	-0.261734	Chr10	+	13551422	13551706	2	245	MSTRG.20214	.
MSTRG.20215.1	u	0.0044107	-0.032768	Chr10	.	13555606	13555931	1	326	MSTRG.20215	.
MSTRG.20231.1	u	0.11743	-0.024576	Chr10	.	13714120	13714323	1	204	MSTRG.20231	.
MSTRG.20236.1	u	0.0194208	-0.110592	Chr10	.	13735871	13736294	1	424	MSTRG.20236	.
MSTRG.20243.1	x	0.0213242	-0.053248	Chr10	-	13780084	13787013	2	291	MSTRG.20243	Potri.010G121100
MSTRG.20259.1	x	0.10638	-0.049152	Chr10	-	13945181	13945658	2	396	MSTRG.20259	Potri.010G122900
MSTRG.20267.1	u	0.14931	-0.04096	Chr10	+	14004891	14005281	1	391	MSTRG.20267	.
MSTRG.20270.1	u	0.0122045	-0.016384	Chr10	.	14028972	14029396	1	425	MSTRG.20270	.
MSTRG.20285.1	j	0.103148	-0.028672	Chr10	-	14157751	14158656	2	789	MSTRG.20285	Potri.010G125700
MSTRG.2029.1	i	0.03588	-0.024576	Chr01	+	25003388	25003684	1	297	MSTRG.2029	Potri.001G239000
MSTRG.20293.1	u	0.0182754	-0.0004096	Chr10	.	14279275	14279500	1	226	MSTRG.20293	.
MSTRG.20304.1	i	0.00870552	-0.0004096	Chr10	.	14338206	14338432	1	227	MSTRG.20304	Potri.010G128100
MSTRG.20317.1	i	0.0408015	-0.0708608	Chr10	.	14447039	14447895	1	857	MSTRG.20317	Potri.010G129300
MSTRG.20318.1	x	0.0286449	-0.131072	Chr10	-	14462999	14463387	2	330	MSTRG.20318	Potri.010G129500
MSTRG.20329.1	u	0.117543	-0.0004096	Chr10	.	14607582	14607819	1	238	MSTRG.20329	.
MSTRG.20342.3	j	0.206143	-0.012288	Chr10	+	14717454	14720105	3	1149	MSTRG.20342	Potri.010G132400
MSTRG.20345.1	u	0.0532399	-0.12288	Chr10	-	14727279	14727754	1	476	MSTRG.20345	.
MSTRG.20365.1	u	0.038404	-0.036864	Chr10	.	14913887	14914155	1	269	MSTRG.20365	.
MSTRG.20380.1	i	0.0114277	-0.376832	Chr10	+	15009648	15010000	2	319	MSTRG.20380	Potri.010G136900
MSTRG.20384.1	u	0.0518469	-0.0753664	Chr10	-	15025817	15026428	2	219	MSTRG.20384	.
MSTRG.20393.1	u	0.141641	-0.0331776	Chr10	.	15115900	15116982	1	1083	MSTRG.20393	.
MSTRG.20404.1	x	0.0472166	-0.0311296	Chr10	-	15168802	15169142	2	296	MSTRG.20404	Potri.010G139100
MSTRG.20416.8	j	0.0131342	-0.0004096	Chr10	-	15285274	15286333	2	956	MSTRG.20416	Potri.010G141300
MSTRG.20418.1	i	0.00370519	-0.012288	Chr10	.	15306169	15306457	1	289	MSTRG.20418	Potri.010G141500
MSTRG.20424.2	j	0.0789527	-0.0032768	Chr10	+	15336699	15337493	3	611	MSTRG.20424	Potri.010G142000
MSTRG.20429.1	u	0.0876929	-0.0004096	Chr10	.	15369665	15370042	1	378	MSTRG.20429	.
MSTRG.20437.1	i	0.0479574	-0.0311296	Chr10	-	15404366	15406793	2	2304	MSTRG.20437	Potri.010G142700
MSTRG.20441.2	j	0.0374563	-0.126976	Chr10	+	15433636	15435200	2	496	MSTRG.20441	Potri.010G143100
MSTRG.20447.3	j	0.0150171	-0.0069632	Chr10	+	15507760	15508463	2	605	MSTRG.20447	Potri.010G144600
MSTRG.2046.1	u	0.0310043	-0.0004096	Chr01	.	25209513	25209947	1	435	MSTRG.2046	.
MSTRG.20463.1	u	0.012823	-0.0028672	Chr10	.	15655230	15655502	1	273	MSTRG.20463	.
MSTRG.20485.1	u	0.0309454	-0.0004096	Chr10	.	15783061	15783605	1	545	MSTRG.20485	.
MSTRG.2050.3	j	0.290333	-0.0188416	Chr01	-	25229985	25233115	3	2799	MSTRG.2050	Potri.001G241500
MSTRG.20520.1	x	0.0243234	-0.0004096	Chr10	-	16108276	16108666	2	220	MSTRG.20520	Potri.010G153500
MSTRG.20538.1	x	0.0222598	-0.0679936	Chr10	-	16272361	16273149	2	668	MSTRG.20538	Potri.010G155300
MSTRG.20539.1	o	0.0140627	-0.032768	Chr10	-	16273928	16335388	2	295	MSTRG.20539	Potri.010G155600
MSTRG.20542.2	j	0.0082986	-0.352256	Chr10	-	16289947	16290293	2	221	MSTRG.20542	Potri.010G155600
MSTRG.20565.2	j	0.118129	-0.0004096	Chr10	+	16530988	16532786	4	755	MSTRG.20565	Potri.010G159200
MSTRG.20580.1	u	0.0154995	-0.0004096	Chr10	.	16649663	16649879	1	217	MSTRG.20580	.
MSTRG.20585.1	u	0.0577767	-0.0004096	Chr10	.	16662534	16662787	1	254	MSTRG.20585	.
MSTRG.20587.1	x	0.00694825	-0.297779	Chr10	+	16660148	16660545	2	275	MSTRG.20587	Potri.010G161200
MSTRG.2062.1	u	0.0752893	-0.004096	Chr01	.	25426281	25426733	1	453	MSTRG.2062	.
MSTRG.20621.3	j	0.00325319	-0.0401408	Chr10	-	16886241	16886525	2	245	MSTRG.20621	Potri.010G165000
MSTRG.20622.1	o	0.0161864	-0.06144	Chr10	+	16886370	16941795	2	236	MSTRG.20622	Potri.010G165800
MSTRG.20625.1	o	0.0864534	-0.077824	Chr10	-	16901542	16932122	2	283	MSTRG.20625	Potri.010G165400
MSTRG.20645.1	u	0.0331496	-0.249856	Chr10	-	17073983	17074664	2	662	MSTRG.20645	.
MSTRG.20673.1	u	0.0184119	-0.008192	Chr10	+	17255199	17257463	2	1056	MSTRG.20673	.
MSTRG.20683.1	u	0.0313357	-0.016384	Chr10	-	17305118	17306807	2	1647	MSTRG.20683	.
MSTRG.20683.2	x	0.0260566	-0.016384	Chr10	-	17305146	17306868	2	1680	MSTRG.20683	Potri.010G172100
MSTRG.20690.1	x	0.0206984	-0.155648	Chr10	-	17369065	17378795	2	299	MSTRG.20690	Potri.010G172900
MSTRG.20695.1	i	0.0483178	-0.0004096	Chr10	+	17403005	17403526	2	367	MSTRG.20695	Potri.010G173200
MSTRG.207.1	x	0.0192242	-0.0004096	Chr01	-	1867481	1867774	2	263	MSTRG.207	Potri.001G025100
MSTRG.20727.1	u	0.0108815	-0.120832	Chr10	.	17746565	17746804	1	240	MSTRG.20727	.
MSTRG.20732.1	x	0.0147732	-0.036864	Chr10	-	17714821	17722749	2	299	MSTRG.20732	Potri.010G177900
MSTRG.20733.1	x	0.0612163	-0.069632	Chr10	-	17715376	17730457	2	244	MSTRG.20733	Potri.010G177900
MSTRG.20733.2	x	1.1071e-05	-0.0004096	Chr10	-	17715414	17723251	2	208	MSTRG.20733	Potri.010G177900
MSTRG.20734.1	x	0.0334313	-0.0499712	Chr10	-	17715627	17730749	2	285	MSTRG.20734	Potri.010G177900
MSTRG.20736.1	x	0.0501103	-0.0282624	Chr10	-	17716473	17724389	2	285	MSTRG.20736	Potri.010G177900
MSTRG.20736.2	x	0.0585071	-0.0167936	Chr10	-	17716488	17724411	2	292	MSTRG.20736	Potri.010G177900
MSTRG.20741.1	x	0.186564	-0.0004096	Chr10	+	17783259	17783791	2	302	MSTRG.20741	Potri.010G178800
MSTRG.20751.1	x	0.0177242	-0.008192	Chr10	+	17863525	17863811	2	245	MSTRG.20751	Potri.010G180100
MSTRG.20762.1	u	0.0111312	-0.004096	Chr10	.	17951444	17951925	1	482	MSTRG.20762	.
MSTRG.20776.1	x	0.0336847	-0.024576	Chr10	-	18020556	18025868	2	494	MSTRG.20776	Potri.010G182600
MSTRG.20786.1	u	0.0825383	-0.07168	Chr10	-	18106706	18108679	4	677	MSTRG.20786	.
MSTRG.20807.1	x	0.0319718	-0.036864	Chr10	-	18272651	18273508	2	285	MSTRG.20807	Potri.010G186300
MSTRG.20819.1	x	0.015129	-0.192512	Chr10	+	18336666	18337873	2	460	MSTRG.20819	Potri.010G187500
MSTRG.20824.1	u	0.00846163	-0.065536	Chr10	.	18379301	18379536	1	236	MSTRG.20824	.
MSTRG.20827.1	u	0.014619	-0.0004096	Chr10	-	18396276	18396820	1	545	MSTRG.20827	.
MSTRG.20829.1	u	0.0126311	-0.077824	Chr10	-	18398964	18400547	3	1255	MSTRG.20829	.
MSTRG.2086.1	i	0.0396318	-0.086016	Chr01	+	25672224	25673306	2	1015	MSTRG.2086	Potri.001G246100
MSTRG.20865.1	x	0.0125352	-0.0004096	Chr10	-	18668727	18669044	2	287	MSTRG.20865	Potri.010G191900
MSTRG.20893.2	j	0.0591668	-0.0167936	Chr10	+	18834297	18837065	3	1304	MSTRG.20893	Potri.010G194400
MSTRG.20928.1	x	0.0320338	-0.0835584	Chr10	+	19106897	19107260	2	323	MSTRG.20928	Potri.010G198800
MSTRG.20934.1	x	0.0439546	-0.12329	Chr10	-	19152275	19153727	2	1396	MSTRG.20934	Potri.010G199300
MSTRG.20948.1	u	0.00422525	-0.0004096	Chr10	.	19251497	19251914	1	418	MSTRG.20948	.
MSTRG.20957.1	x	0.0112777	-0.0004096	Chr10	-	19311822	19312126	2	283	MSTRG.20957	Potri.010G201500
MSTRG.20976.1	u	0.0104377	-0.0004096	Chr10	.	19504414	19504637	1	224	MSTRG.20976	.
MSTRG.21000.1	x	0.0219303	-0.012288	Chr10	-	19641873	19652339	2	300	MSTRG.21000	Potri.010G205800
MSTRG.21000.2	x	0.0354519	-0.0495616	Chr10	-	19651956	19652339	2	299	MSTRG.21000	Potri.010G205800
MSTRG.2101.1	x	0.0137806	-0.28672	Chr01	-	25791225	25791671	2	251	MSTRG.2101	Potri.001G248100
MSTRG.2102.1	u	0.0125004	-0.38912	Chr01	.	25800699	25800955	1	257	MSTRG.2102	.
MSTRG.21030.1	u	0.00640286	-0.0004096	Chr10	.	19884727	19884945	1	219	MSTRG.21030	.
MSTRG.21041.1	x	0.179058	-0.028672	Chr10	+	19930343	19933366	2	235	MSTRG.21041	Potri.010G210500
MSTRG.21042.1	o	0.0608248	-0.06144	Chr10	+	19930435	19939291	2	240	MSTRG.21042	Potri.010G210700
MSTRG.21049.1	u	0.00864413	-0.0004096	Chr10	+	20015592	20016583	1	992	MSTRG.21049	.
MSTRG.21073.1	x	0.0251232	-0.0176128	Chr10	+	20171387	20177439	2	300	MSTRG.21073	Potri.010G213900
MSTRG.21091.1	u	0.0764946	-0.004096	Chr10	.	20291875	20292737	1	863	MSTRG.21091	.
MSTRG.21112.1	o	0.00524258	-0.0004096	Chr10	-	20461453	20473782	2	283	MSTRG.21112	Potri.010G218900
MSTRG.21112.2	o	0.00488813	-0.024576	Chr10	-	20467945	20473755	2	265	MSTRG.21112	Potri.010G218900
MSTRG.21124.1	x	0.0216745	-0.0004096	Chr10	-	20543502	20543887	2	364	MSTRG.21124	Potri.010G220100
MSTRG.21135.1	j	0.199069	-0.053248	Chr10	+	20619104	20622770	3	644	MSTRG.21135	Potri.010G221300
MSTRG.21138.1	i	0.00471749	-0.106496	Chr10	+	20652023	20652270	2	227	MSTRG.21138	Potri.010G221700
MSTRG.21138.2	i	0.0247766	-0.380928	Chr10	+	20652042	20652639	1	598	MSTRG.21138	Potri.010G221700
MSTRG.21154.1	i	0.0129295	-0.0004096	Chr10	.	20760720	20760951	1	232	MSTRG.21154	Potri.010G223400
MSTRG.21157.1	x	0.0313689	-0.069632	Chr10	-	20778214	20778851	3	493	MSTRG.21157	Potri.010G223700
MSTRG.21162.1	x	0.00671689	-0.0065536	Chr10	-	20809842	20817085	2	617	MSTRG.21162	Potri.010G224100
MSTRG.21163.1	x	0.00942428	-0.237158	Chr10	-	20810479	20817323	2	219	MSTRG.21163	Potri.010G224100
MSTRG.21165.1	x	0.0409972	-0.0004096	Chr10	-	20811571	20818475	2	279	MSTRG.21165	Potri.010G224100
MSTRG.21166.1	x	0.00716073	-0.0147456	Chr10	-	20811781	20818782	2	376	MSTRG.21166	Potri.010G224100
MSTRG.21191.1	u	0.0242773	-0.0004096	Chr10	+	21049254	21049711	1	458	MSTRG.21191	.
MSTRG.21200.1	u	0.0268443	-0.106496	Chr10	+	21152061	21152908	1	848	MSTRG.21200	.
MSTRG.2132.1	u	0.00962191	-0.0004096	Chr01	.	26225077	26225287	1	211	MSTRG.2132	.
MSTRG.21355.1	u	0.0784225	-0.057344	Chr10	+	22150197	22150422	1	226	MSTRG.21355	.
MSTRG.21364.2	j	0.036883	-0.0438272	Chr10	-	22200317	22202146	4	566	MSTRG.21364	Potri.010G248800
MSTRG.21392.1	x	0.0200926	-0.176947	Chr10	+	22380577	22387426	2	281	MSTRG.21392	Potri.010G252400
MSTRG.2142.1	x	0.00660362	-0.0004096	Chr01	-	26336673	26347792	3	432	MSTRG.2142	Potri.001G253600
MSTRG.2143.1	x	0.0160161	-0.004096	Chr01	-	26337615	26348809	2	856	MSTRG.2143	Potri.001G253600
MSTRG.21436.1	x	0.0828177	-0.065536	Chr11	+	171651	186212	2	274	MSTRG.21436	Potri.011G002800
MSTRG.2144.1	o	0.00812316	-0.167936	Chr01	+	26340358	26350973	2	284	MSTRG.2144	Potri.001G253600
MSTRG.21444.1	u	0.0086691	-0.0004096	Chr11	.	287693	288117	1	425	MSTRG.21444	.
MSTRG.21453.1	u	0.166463	-0.022528	Chr11	.	1194597	1194880	1	284	MSTRG.21453	.
MSTRG.21454.1	u	0.0162705	-0.0004096	Chr11	.	1196789	1197107	1	319	MSTRG.21454	.
MSTRG.21456.1	u	0.0212825	-0.0004096	Chr11	.	1200873	1201574	1	702	MSTRG.21456	.
MSTRG.21460.1	i	0.00545373	-0.202342	Chr11	.	1572849	1573171	1	323	MSTRG.21460	Potri.011G018700
MSTRG.21473.1	x	0.00611541	-0.0004096	Chr11	+	1234776	1278374	2	352	MSTRG.21473	Potri.011G015600
MSTRG.21476.1	x	0.0144493	-0.0004096	Chr11	+	1258426	1307593	2	242	MSTRG.21476	Potri.011G015900
MSTRG.21478.1	o	0.0138552	-0.0004096	Chr11	+	1261356	1542170	3	242	MSTRG.21478	Potri.011G017000
MSTRG.2149.1	x	0.137643	-0.0004096	Chr01	-	26379032	26379345	2	210	MSTRG.2149	Potri.001G254000
MSTRG.2150.1	u	0.124959	-0.0004096	Chr01	.	26421422	26421842	1	421	MSTRG.2150	.
MSTRG.21500.1	u	0.00623836	-0.18432	Chr11	.	1938889	1939568	1	680	MSTRG.21500	.
MSTRG.21508.1	u	0.00645682	-0.0004096	Chr11	.	1982944	1983245	1	302	MSTRG.21508	.
MSTRG.21514.1	i	0.0118535	-0.04096	Chr11	-	2030292	2031787	2	1416	MSTRG.21514	Potri.011G024500
MSTRG.21540.1	o	0.118362	-0.0876544	Chr11	-	395665	494640	2	276	MSTRG.21540	Potri.011G005000
MSTRG.21600.2	j	0.0393072	-0.094208	Chr11	-	839151	841904	6	1119	MSTRG.21600	Potri.011G011000
MSTRG.21609.1	u	0.00907078	-0.057344	Chr11	+	954168	954680	2	308	MSTRG.21609	.
MSTRG.21614.1	j	0.0443341	-0.0004096	Chr11	+	988407	1048168	2	263	MSTRG.21614	Potri.011G013100
MSTRG.21614.2	j	0.0637706	-0.0004096	Chr11	+	992959	1048168	2	202	MSTRG.21614	Potri.011G013100
MSTRG.21626.1	i	0.088974	-0.086016	Chr11	.	1086127	1086346	1	220	MSTRG.21626	Potri.011G013500
MSTRG.21629.1	u	0.00550757	-0.0004096	Chr11	+	1100100	1100359	1	260	MSTRG.21629	.
MSTRG.2163.1	x	0.115885	-0.0262144	Chr01	+	26518026	26518284	2	201	MSTRG.2163	Potri.001G255700
MSTRG.21630.1	u	0.00299543	-0.0004096	Chr11	-	1100100	1100362	1	263	MSTRG.21630	.
MSTRG.21634.1	o	0.00411581	-0.024576	Chr11	-	1122569	1170264	2	251	MSTRG.21634	Potri.011G014300
MSTRG.21644.1	x	0.0783781	-0.0004096	Chr11	-	2335834	2336169	2	260	MSTRG.21644	Potri.011G028400
MSTRG.21661.1	o	0.106617	-0.004096	Chr11	-	2376070	2492066	2	294	MSTRG.21661	Potri.011G029300
MSTRG.21662.1	x	0.0207855	-0.02048	Chr11	-	2377996	2396111	2	424	MSTRG.21662	Potri.011G028800
MSTRG.21665.1	o	0.0281517	-0.079872	Chr11	-	2408583	2464225	2	366	MSTRG.21665	Potri.011G029300
MSTRG.21670.1	o	0.0162796	-0.0004096	Chr11	-	2461532	2498588	2	204	MSTRG.21670	Potri.011G029900
MSTRG.21672.1	x	0.0144234	-0.233472	Chr11	-	2498202	2521575	2	228	MSTRG.21672	Potri.011G030100
MSTRG.2168.1	u	0.00268124	-0.0004096	Chr01	.	26615352	26615728	1	377	MSTRG.2168	.
MSTRG.21681.1	x	0.0134904	-0.0004096	Chr11	+	2716256	2716862	2	293	MSTRG.21681	Potri.011G033100
MSTRG.21689.1	x	0.00391013	-0.028672	Chr11	+	3288572	3298368	2	270	MSTRG.21689	Potri.011G038800
MSTRG.21695.1	u	0.0364964	-0.0077824	Chr11	+	3378505	3387393	2	226	MSTRG.21695	.
MSTRG.21696.1	u	0.0067346	-0.0004096	Chr11	.	3386496	3386765	1	270	MSTRG.21696	.
MSTRG.21701.1	u	0.0207446	-0.192512	Chr11	.	3482327	3482851	1	525	MSTRG.21701	.
MSTRG.21714.1	j	0.247819	-0.02048	Chr11	-	3629974	3631406	3	1219	MSTRG.21714	Potri.011G042800
MSTRG.21715.1	o	0.0156747	-0.069632	Chr11	+	2757600	3112051	3	357	MSTRG.21715	Potri.011G035700
MSTRG.21715.2	o	0.0140472	-0.0294912	Chr11	+	2757600	3268418	3	403	MSTRG.21715	Potri.011G035700
MSTRG.21715.3	o	0.010682	-0.0004096	Chr11	+	2757600	3112017	3	322	MSTRG.21715	Potri.011G035700
MSTRG.21715.4	o	0.0107864	-0.0118784	Chr11	+	2757600	3268392	3	376	MSTRG.21715	Potri.011G035700
MSTRG.21715.5	o	0.0157273	-0.069632	Chr11	+	2757600	3261106	3	344	MSTRG.21715	Potri.011G035700
MSTRG.21738.1	o	0.0113858	-0.032768	Chr11	+	2987698	3263952	2	415	MSTRG.21738	Potri.011G035700
MSTRG.21739.1	o	0.0173189	-0.0790528	Chr11	+	2988920	3265001	2	241	MSTRG.21739	Potri.011G035700
MSTRG.21778.1	u	0.00559732	-0.0004096	Chr11	.	3754888	3755124	1	237	MSTRG.21778	.
MSTRG.21791.1	i	0.021128	-0.0004096	Chr11	+	3856808	3857721	2	853	MSTRG.21791	Potri.011G045500
MSTRG.21807.1	j	0.0240885	-0.004096	Chr11	+	4056705	4058580	3	545	MSTRG.21807	Potri.011G047400
MSTRG.21816.1	o	0.167113	-0.0016384	Chr11	-	4135790	4184000	3	447	MSTRG.21816	Potri.011G048600
MSTRG.21816.2	o	0.0768995	-0.0090112	Chr11	-	4135958	4184002	3	281	MSTRG.21816	Potri.011G048600
MSTRG.21816.3	o	0.067744	-0.0249856	Chr11	-	4135958	4184002	2	281	MSTRG.21816	Potri.011G048600
MSTRG.21817.1	x	0.0137821	-0.0004096	Chr11	-	4136181	4146473	2	246	MSTRG.21817	Potri.011G048100
MSTRG.21817.2	o	0.0101061	-0.0004096	Chr11	-	4136181	4196962	2	222	MSTRG.21817	Potri.011G048600
MSTRG.21818.1	o	0.014742	-0.104858	Chr11	-	4145602	4202057	3	214	MSTRG.21818	Potri.011G048600
MSTRG.21818.2	o	0.0210635	-0.0831488	Chr11	-	4145602	4202093	2	250	MSTRG.21818	Potri.011G048600
MSTRG.21818.3	o	0.0244462	-0.032768	Chr11	-	4145606	4196404	3	286	MSTRG.21818	Potri.011G048600
MSTRG.21818.4	x	0.0173495	-0.0733184	Chr11	-	4183309	4196404	2	300	MSTRG.21818	Potri.011G049000
MSTRG.21831.1	x	0.0124206	-0.0004096	Chr11	+	4341351	4341691	2	251	MSTRG.21831	Potri.011G050400
MSTRG.21869.1	i	0.0106868	-0.0004096	Chr11	.	4935544	4935853	1	310	MSTRG.21869	Potri.011G056300
MSTRG.21880.1	u	0.176647	-0.0262144	Chr11	.	5098786	5099048	1	263	MSTRG.21880	.
MSTRG.21897.1	i	0.00682263	-0.138854	Chr11	+	5366857	5367784	2	867	MSTRG.21897	Potri.011G059800
MSTRG.219.1	u	0.0355046	-0.0004096	Chr01	-	2011975	2012692	1	718	MSTRG.219	.
MSTRG.21918.1	u	0.00458909	-0.0004096	Chr11	-	5686142	5695542	2	205	MSTRG.21918	.
MSTRG.21919.1	x	0.0119378	-0.0004096	Chr11	+	5701838	5715478	2	238	MSTRG.21919	Potri.011G062900
MSTRG.21948.1	u	0.0133815	-0.002048	Chr11	+	6199175	6199674	2	366	MSTRG.21948	.
MSTRG.21961.1	i	0.0183911	-0.057344	Chr11	-	6353575	6353939	1	365	MSTRG.21961	Potri.011G068100
MSTRG.21978.1	o	0.0139039	-0.0438272	Chr11	+	6562295	6571779	2	274	MSTRG.21978	Potri.011G070100
MSTRG.21980.1	u	0.0175856	-0.0126976	Chr11	.	6574446	6574746	1	301	MSTRG.21980	.
MSTRG.21987.2	j	0.0336044	-0.073728	Chr11	-	6747352	6751757	3	2898	MSTRG.21987	Potri.011G071200
MSTRG.21999.1	u	0.0162632	-0.1024	Chr11	.	7072892	7073116	1	225	MSTRG.21999	.
MSTRG.22003.1	u	0.0249346	-0.0638976	Chr11	.	7188039	7188337	1	299	MSTRG.22003	.
MSTRG.22008.1	u	0.149649	-0.196608	Chr11	.	7346038	7346980	1	943	MSTRG.22008	.
MSTRG.22009.1	u	0.0491617	-0.0053248	Chr11	+	7342911	7344794	3	1415	MSTRG.22009	.
MSTRG.22009.2	u	0.0457375	-0.0053248	Chr11	+	7342918	7345438	3	2050	MSTRG.22009	.
MSTRG.22009.3	u	0.0224845	-0.0053248	Chr11	+	7342918	7344975	4	1036	MSTRG.22009	.
MSTRG.22009.4	u	0.0401022	-0.0053248	Chr11	+	7342918	7344966	4	1029	MSTRG.22009	.
MSTRG.2201.1	u	0.0689013	-0.0004096	Chr01	.	27082501	27082824	1	324	MSTRG.2201	.
MSTRG.22018.1	u	0.0151535	-0.036864	Chr11	-	7662865	7665653	2	627	MSTRG.22018	.
MSTRG.22022.1	x	0.00321728	-0.116736	Chr11	-	7687448	7687781	2	286	MSTRG.22022	Potri.011G077700
MSTRG.22042.1	u	4.67569e-07	-0.0004096	Chr11	.	7993660	7994023	1	364	MSTRG.22042	.
MSTRG.22054.1	u	0.0270571	-0.0217088	Chr11	+	8146251	8146650	1	400	MSTRG.22054	.
MSTRG.22057.1	i	0.0795027	-0.0159744	Chr11	-	8176218	8178658	2	2414	MSTRG.22057	Potri.011G081600
MSTRG.22058.1	i	0.0127759	-0.0004096	Chr11	.	8179168	8179458	1	291	MSTRG.22058	Potri.011G081600
MSTRG.22075.1	u	0.0146207	-0.503808	Chr11	.	8756636	8756922	1	287	MSTRG.22075	.
MSTRG.22079.1	u	0.00322738	-0.0004096	Chr11	.	8966630	8966865	1	236	MSTRG.22079	.
MSTRG.22080.1	u	0.00394397	-0.0004096	Chr11	.	8997166	8997439	1	274	MSTRG.22080	.
MSTRG.22090.1	i	0.031217	-0.032768	Chr11	+	10103004	10106015	1	3012	MSTRG.22090	Potri.011G086800
MSTRG.22091.1	i	0.0220361	-0.0004096	Chr11	+	10109621	10111398	2	1603	MSTRG.22091	Potri.011G086800
MSTRG.22091.2	i	0.0225624	-0.0004096	Chr11	+	10109889	10111398	3	1211	MSTRG.22091	Potri.011G086800
MSTRG.22094.1	x	0.0359356	-0.0004096	Chr11	+	10435369	10436230	2	548	MSTRG.22094	Potri.011G087500
MSTRG.22104.1	x	0.0319768	-0.0004096	Chr11	+	10721905	10722226	2	279	MSTRG.22104	Potri.011G089200
MSTRG.22114.1	i	0.0127194	-0.229376	Chr11	+	10864724	10865191	1	468	MSTRG.22114	Potri.011G090200
MSTRG.22121.1	u	0.0404823	-0.0004096	Chr11	-	11091170	11092300	2	1078	MSTRG.22121	.
MSTRG.22122.1	u	0.00980979	-0.0004096	Chr11	.	11092580	11093278	1	699	MSTRG.22122	.
MSTRG.22129.1	x	0.0350064	-0.045056	Chr11	+	11055610	11064655	3	1221	MSTRG.22129	Potri.011G091200
MSTRG.22131.1	u	0.0032475	-0.014336	Chr11	-	11149006	11149657	2	516	MSTRG.22131	.
MSTRG.22132.1	u	0.0198795	-0.094208	Chr11	.	11150223	11150430	1	208	MSTRG.22132	.
MSTRG.22142.1	x	0.133173	-0.0249856	Chr11	+	11332306	11333941	3	400	MSTRG.22142	Potri.011G093400
MSTRG.22150.1	u	0.0201541	-0.110592	Chr11	.	11509574	11510105	1	532	MSTRG.22150	.
MSTRG.22158.1	u	0.187195	-0.0458752	Chr11	+	11652587	11654068	2	1173	MSTRG.22158	.
MSTRG.22168.1	u	0.0659311	-0.086016	Chr11	-	11764295	11764527	1	233	MSTRG.22168	.
MSTRG.22170.1	u	0.06403	-0.0200704	Chr11	.	11781277	11781737	1	461	MSTRG.22170	.
MSTRG.22172.1	j	0.0400176	-0.0188416	Chr11	+	11770383	11777026	4	3051	MSTRG.22172	Potri.011G096700
MSTRG.22172.3	o	0.0619472	-0.0016384	Chr11	+	11771263	11777613	3	1239	MSTRG.22172	Potri.011G096700
MSTRG.22188.1	u	0.00631702	-0.0004096	Chr11	+	12431856	12432155	1	300	MSTRG.22188	.
MSTRG.22189.1	u	0.00924431	-0.151962	Chr11	-	12431856	12432157	1	302	MSTRG.22189	.
MSTRG.22198.1	x	0.0157194	-0.053248	Chr11	-	12544512	12580123	3	372	MSTRG.22198	Potri.011G102900
MSTRG.22199.1	x	0.032981	-0.0004096	Chr11	-	12544840	12560383	2	294	MSTRG.22199	Potri.011G102900
MSTRG.22199.2	x	0.0168505	-0.0004096	Chr11	-	12544840	12580307	2	228	MSTRG.22199	Potri.011G102900
MSTRG.22201.1	u	0.0720651	-0.217088	Chr11	+	12604802	12606200	3	335	MSTRG.22201	.
MSTRG.22206.1	o	0.00529296	-0.196608	Chr11	-	12058616	12088467	2	259	MSTRG.22206	Potri.011G099000
MSTRG.22209.1	o	0.0167975	-0.0086016	Chr11	-	12076593	12104462	2	324	MSTRG.22209	Potri.011G099300
MSTRG.22210.1	o	0.0140987	-0.0004096	Chr11	-	12087043	12407642	3	262	MSTRG.22210	Potri.011G100900
MSTRG.22210.2	o	0.0146014	-0.0004096	Chr11	-	12129780	12407668	2	275	MSTRG.22210	Potri.011G100900
MSTRG.22210.3	o	0.0146014	-0.0004096	Chr11	-	12159739	12407668	2	275	MSTRG.22210	Potri.011G100900
MSTRG.22210.4	x	0.0128828	-0.0004096	Chr11	-	12386849	12407668	2	271	MSTRG.22210	Potri.011G101700
MSTRG.22227.1	o	0.149103	-0.0004096	Chr11	-	12352831	12408136	2	267	MSTRG.22227	Potri.011G101200
MSTRG.22230.3	j	0.132456	-0.159744	Chr11	-	12615691	12618823	5	1670	MSTRG.22230	Potri.011G103600
MSTRG.22230.4	j	0.0554163	-0.196608	Chr11	-	12615736	12617924	3	915	MSTRG.22230	Potri.011G103600
MSTRG.22232.1	u	0.108979	-0.0004096	Chr11	.	12680894	12681195	1	302	MSTRG.22232	.
MSTRG.22234.1	u	0.0385628	-0.0483328	Chr11	.	12687119	12687865	1	747	MSTRG.22234	.
MSTRG.2224.1	o	0.0763476	-0.0004096	Chr01	-	27296798	27299509	2	1147	MSTRG.2224	Potri.001G264700
MSTRG.22251.1	i	0.00793784	-0.0004096	Chr11	+	12903181	12903534	1	354	MSTRG.22251	Potri.011G105700
MSTRG.22269.1	u	0.0187392	-0.141312	Chr11	.	13150930	13151237	1	308	MSTRG.22269	.
MSTRG.22302.2	o	0.036124	-0.038912	Chr11	-	13828142	13852741	2	213	MSTRG.22302	Potri.011G113200
MSTRG.22307.1	i	0.0386424	-0.135168	Chr11	+	13808332	13809529	2	1164	MSTRG.22307	Potri.011G112800
MSTRG.2233.1	x	0.0114758	-0.0004096	Chr01	-	27345687	27363797	2	450	MSTRG.2233	Potri.001G265400
MSTRG.2234.1	o	0.115771	-0.0331776	Chr01	-	27347362	27380720	3	313	MSTRG.2234	Potri.001G265700
MSTRG.22345.1	x	0.181568	-0.02048	Chr11	+	14298348	14306530	2	296	MSTRG.22345	Potri.011G117700
MSTRG.22346.1	x	0.120692	-0.08192	Chr11	+	14298601	14306711	2	224	MSTRG.22346	Potri.011G117700
MSTRG.22355.1	j	0.125564	-0.057344	Chr11	-	14442390	14445434	3	1449	MSTRG.22355	Potri.011G119000
MSTRG.22367.1	x	0.0254595	-0.168346	Chr11	+	14548457	14566397	2	433	MSTRG.22367	Potri.011G120200
MSTRG.22367.2	x	0.0281725	-0.131482	Chr11	+	14548508	14566399	2	384	MSTRG.22367	Potri.011G120200
MSTRG.22369.1	o	0.0454524	-0.233472	Chr11	+	14587504	14590212	3	1478	MSTRG.22369	Potri.011G120600
MSTRG.22392.2	o	0.0237749	-0.14336	Chr11	-	14902364	14919527	2	209	MSTRG.22392	Potri.011G124400
MSTRG.22393.1	x	0.0187958	-0.0004096	Chr11	+	14900626	14917780	2	206	MSTRG.22393	Potri.011G124400
MSTRG.22394.1	x	0.00846329	-0.0004096	Chr11	+	14901387	14918560	2	225	MSTRG.22394	Potri.011G124400
MSTRG.22417.1	i	0.15599	-0.0004096	Chr11	+	15163647	15163959	2	202	MSTRG.22417	Potri.011G126800
MSTRG.22419.1	j	0.027575	-0.128614	Chr11	+	15216692	15218534	2	1756	MSTRG.22419	Potri.011G127100
MSTRG.22431.1	u	0.0040197	-0.0004096	Chr11	.	15329690	15329921	1	232	MSTRG.22431	.
MSTRG.22433.1	u	0.0237381	-0.0004096	Chr11	.	15334237	15334543	1	307	MSTRG.22433	.
MSTRG.22434.1	u	0.0104397	-0.012288	Chr11	.	15335459	15335837	1	379	MSTRG.22434	.
MSTRG.22483.2	x	0.0306892	-0.0077824	Chr11	-	15855891	15856872	2	298	MSTRG.22483	Potri.011G134200
MSTRG.22483.3	x	0.0321146	-0.0827392	Chr11	-	15855896	15857101	2	294	MSTRG.22483	Potri.011G134200
MSTRG.22517.2	j	0.0848856	-0.0446464	Chr11	+	16164116	16165740	2	1237	MSTRG.22517	Potri.011G139300
MSTRG.2252.1	u	0.0105095	-0.04096	Chr01	.	27607575	27607801	1	227	MSTRG.2252	.
MSTRG.22536.1	u	0.0126789	-0.1024	Chr11	-	16362116	16363242	1	1127	MSTRG.22536	.
MSTRG.22547.1	u	0.0101244	-0.02048	Chr11	-	16475588	16476735	2	509	MSTRG.22547	.
MSTRG.22579.1	x	0.0158448	-0.01024	Chr11	-	16723775	16728686	2	592	MSTRG.22579	Potri.011G148200
MSTRG.22582.1	x	0.0601878	-0.176128	Chr11	+	16736320	16739369	2	231	MSTRG.22582	Potri.011G148300
MSTRG.22615.1	u	0.0144082	-0.0004096	Chr11	.	17046601	17046830	1	230	MSTRG.22615	.
MSTRG.22636.1	x	0.0218547	-0.233472	Chr11	-	17326510	17327864	2	928	MSTRG.22636	Potri.011G154800
MSTRG.22646.1	u	0.0522677	-0.0004096	Chr11	.	17386390	17386790	1	401	MSTRG.22646	.
MSTRG.22647.1	u	0.00858073	-0.0180224	Chr11	.	17388897	17389231	1	335	MSTRG.22647	.
MSTRG.22648.1	u	0.0118997	-0.0004096	Chr11	.	17389517	17389730	1	214	MSTRG.22648	.
MSTRG.22665.1	i	0.130645	-0.128205	Chr11	-	17468905	17469963	2	1007	MSTRG.22665	Potri.011G157000
MSTRG.22672.1	u	0.0137049	-0.0106496	Chr11	.	17587237	17587528	1	292	MSTRG.22672	.
MSTRG.22688.1	x	0.0233333	-0.0397312	Chr11	+	17650541	17678409	2	261	MSTRG.22688	Potri.011G159500
MSTRG.22690.1	o	0.0116804	-0.004096	Chr11	+	17661081	17898686	3	381	MSTRG.22690	Potri.011G160800
MSTRG.22699.1	o	0.0102917	-0.0036864	Chr11	+	17819580	17965947	3	301	MSTRG.22699	Potri.011G160800
MSTRG.2270.3	o	0.00274946	-0.16384	Chr01	+	27741998	27742487	2	400	MSTRG.2270	Potri.001G270200
MSTRG.22704.1	x	0.0145259	-0.237568	Chr11	+	17951410	17965374	2	300	MSTRG.22704	Potri.011G161300
MSTRG.22723.1	u	0.00632741	-0.028672	Chr11	+	18195079	18195733	1	655	MSTRG.22723	.
MSTRG.22730.1	u	0.015023	-0.016384	Chr11	.	18228437	18228640	1	204	MSTRG.22730	.
MSTRG.2274.1	x	0.0311549	-0.0540672	Chr01	+	27774261	27788264	2	254	MSTRG.2274	Potri.001G270600
MSTRG.22742.1	u	0.0157543	-0.0004096	Chr11	.	18300602	18300935	1	334	MSTRG.22742	.
MSTRG.2275.1	x	0.0275989	-0.0475136	Chr01	+	27775302	27789407	2	252	MSTRG.2275	Potri.001G270600
MSTRG.22761.1	i	0.00625524	-0.0004096	Chr11	+	18449948	18450223	1	276	MSTRG.22761	Potri.011G169300
MSTRG.22767.1	u	0.00288824	-0.151142	Chr12	.	14720	15122	1	403	MSTRG.22767	.
MSTRG.2277.1	x	0.0749915	-0.028672	Chr01	-	27861252	27861856	2	573	MSTRG.2277	Potri.001G271200
MSTRG.2278.1	i	0.0164644	-0.073728	Chr01	-	27863776	27864638	2	830	MSTRG.2278	Potri.001G271200
MSTRG.22795.1	u	0.00704009	-0.0004096	Chr12	.	1010618	1010985	1	368	MSTRG.22795	.
MSTRG.22798.1	x	0.0265188	-0.0004096	Chr12	-	837157	857197	2	304	MSTRG.22798	Potri.012G009800
MSTRG.22800.2	j	0.196524	-0.0856064	Chr12	+	856851	857690	3	422	MSTRG.22800	Potri.012G010000
MSTRG.22801.1	o	0.00356627	-0.0004096	Chr12	-	860699	949411	2	282	MSTRG.22801	Potri.012G010400
MSTRG.22804.1	u	0.101229	-0.06144	Chr12	.	882417	883598	1	1182	MSTRG.22804	.
MSTRG.22815.2	j	0.0776356	-0.057344	Chr12	+	252835	260245	2	336	MSTRG.22815	Potri.012G003000
MSTRG.22818.1	i	0.0161583	-0.0004096	Chr12	.	264054	264310	1	257	MSTRG.22818	Potri.012G003100
MSTRG.22820.1	o	0.0143981	-0.0004096	Chr12	-	279296	700085	2	474	MSTRG.22820	Potri.012G005000
MSTRG.22880.1	u	0.00806864	-0.036864	Chr12	.	1437628	1438249	1	622	MSTRG.22880	.
MSTRG.2289.1	x	0.0764119	-0.006144	Chr01	-	27968135	27977540	2	406	MSTRG.2289	Potri.001G272800
MSTRG.22896.1	o	0.0497787	-0.0352256	Chr12	-	1546255	1547287	2	419	MSTRG.22896	Potri.012G016100
MSTRG.2290.1	x	0.0210215	-0.185958	Chr01	-	27968709	27977939	2	215	MSTRG.2290	Potri.001G272800
MSTRG.22905.1	x	0.0206652	-0.069632	Chr12	+	1606575	1607026	2	427	MSTRG.22905	Potri.012G017100
MSTRG.22912.1	x	0.0340092	-0.299008	Chr12	+	1654027	1654327	2	233	MSTRG.22912	Potri.012G017700
MSTRG.22925.1	u	0.0400836	-0.053248	Chr12	-	1811019	1815624	2	466	MSTRG.22925	.
MSTRG.22928.1	j	0.0518623	-0.167936	Chr12	-	1853142	1856131	2	946	MSTRG.22928	Potri.012G020400
MSTRG.22933.2	j	0.385207	-0.053248	Chr12	+	1886278	1887157	3	573	MSTRG.22933	Potri.012G020700
MSTRG.22951.1	u	0.0162559	-0.0892928	Chr12	.	1987260	1987839	1	580	MSTRG.22951	.
MSTRG.22960.1	u	0.0781821	-0.045056	Chr12	-	2069545	2071606	1	2062	MSTRG.22960	.
MSTRG.22968.1	u	0.0892021	-0.59392	Chr12	.	2204783	2205018	1	236	MSTRG.22968	.
MSTRG.22969.1	u	0.0532972	-0.125747	Chr12	.	2206735	2206948	1	214	MSTRG.22969	.
MSTRG.22974.1	u	0.0731242	-0.0323584	Chr12	.	2242252	2242507	1	256	MSTRG.22974	.
MSTRG.22975.1	u	0.00565141	-0.094208	Chr12	.	2648431	2648845	1	415	MSTRG.22975	.
MSTRG.22992.1	u	0.186077	-0.0110592	Chr12	.	2557965	2558415	1	451	MSTRG.22992	.
MSTRG.23001.1	j	0.459195	-0.004096	Chr12	+	2672954	2673914	3	807	MSTRG.23001	Potri.012G029700
MSTRG.23002.1	o	0.159633	-0.0487424	Chr12	-	2673917	2704162	2	726	MSTRG.23002	Potri.012G030300
MSTRG.23002.3	o	0.0176527	-0.0004096	Chr12	-	2681526	2704162	2	248	MSTRG.23002	Potri.012G030300
MSTRG.23006.2	j	0.0490759	-0.032768	Chr12	-	2685718	2697594	2	838	MSTRG.23006	Potri.012G030300
MSTRG.2301.1	i	0.0497434	-0.0004096	Chr01	.	28056138	28056615	1	478	MSTRG.2301	Potri.001G274100
MSTRG.23012.1	u	0.00359395	-0.0004096	Chr12	+	2819019	2819278	1	260	MSTRG.23012	.
MSTRG.23021.1	u	0.0106288	-0.0069632	Chr12	-	2902717	2903231	2	397	MSTRG.23021	.
MSTRG.23028.1	i	0.0117912	-0.0004096	Chr12	-	2946765	2947068	2	208	MSTRG.23028	Potri.012G033100
MSTRG.23041.1	x	0.00556633	-0.0004096	Chr12	-	2973770	3001375	2	288	MSTRG.23041	Potri.012G033500
MSTRG.23042.1	x	0.00504833	-0.0004096	Chr12	-	2976923	3004442	2	206	MSTRG.23042	Potri.012G033500
MSTRG.2305.1	i	0.126266	-0.08192	Chr01	+	28087720	28088710	2	748	MSTRG.2305	Potri.001G274500
MSTRG.23053.1	o	1.54106e-05	-0.043008	Chr12	+	3204520	3225456	2	291	MSTRG.23053	Potri.012G035900
MSTRG.23054.1	o	0.0151738	-0.104448	Chr12	+	3205536	3226387	2	209	MSTRG.23054	Potri.012G035900
MSTRG.23056.1	u	0.0160907	-0.0004096	Chr12	+	3231393	3231754	1	362	MSTRG.23056	.
MSTRG.23068.1	u	0.0174555	-0.0135168	Chr12	.	3338480	3338746	1	267	MSTRG.23068	.
MSTRG.23076.1	i	0.0522545	-0.0004096	Chr12	.	3376577	3377026	1	450	MSTRG.23076	Potri.012G038200
MSTRG.23079.1	u	0.0129299	-0.0004096	Chr12	.	3402533	3402792	1	260	MSTRG.23079	.
MSTRG.23091.1	i	0.0173173	-0.024576	Chr12	-	3506319	3507450	2	1072	MSTRG.23091	Potri.012G039700
MSTRG.23098.1	u	0.274651	-0.04096	Chr12	.	3576367	3576776	1	410	MSTRG.23098	.
MSTRG.23099.1	u	0.0139845	-0.116736	Chr12	.	3582757	3582976	1	220	MSTRG.23099	.
MSTRG.23133.1	i	0.0348754	-0.118784	Chr12	-	4071148	4071715	2	436	MSTRG.23133	Potri.012G044700
MSTRG.23156.1	u	0.0179463	-0.139264	Chr12	.	4396587	4396855	1	269	MSTRG.23156	.
MSTRG.23157.1	u	0.0384037	-0.0475136	Chr12	.	4397327	4397643	1	317	MSTRG.23157	.
MSTRG.23159.1	u	0.221086	-0.192512	Chr12	+	4463125	4463457	1	333	MSTRG.23159	.
MSTRG.23164.1	x	0.0314087	-0.0323584	Chr12	-	4428718	4429443	1	726	MSTRG.23164	Potri.012G047500
MSTRG.23168.1	u	0.0947731	-0.0004096	Chr12	+	4551622	4551945	1	324	MSTRG.23168	.
MSTRG.23174.1	u	0.0653882	-0.073728	Chr12	.	4652976	4653224	1	249	MSTRG.23174	.
MSTRG.23181.1	u	0.015081	-0.0004096	Chr12	.	4722441	4722649	1	209	MSTRG.23181	.
MSTRG.23191.1	i	0.0151967	-0.0004096	Chr12	.	4841815	4842050	1	236	MSTRG.23191	Potri.012G050500
MSTRG.23202.1	i	0.157195	-0.012288	Chr12	.	5202287	5202784	1	498	MSTRG.23202	Potri.012G052600
MSTRG.23204.1	u	0.0221669	-0.135168	Chr12	.	5318181	5318446	1	266	MSTRG.23204	.
MSTRG.23205.1	u	0.0209758	-0.129434	Chr12	.	5346275	5346479	1	205	MSTRG.23205	.
MSTRG.23217.1	u	0.0292695	-0.016384	Chr12	.	5518037	5518412	1	376	MSTRG.23217	.
MSTRG.23220.1	x	0.0411254	-0.094208	Chr12	-	5503438	5503756	2	295	MSTRG.23220	Potri.012G054300
MSTRG.23228.1	u	0.00437017	-0.12288	Chr12	.	5607792	5608206	1	415	MSTRG.23228	.
MSTRG.2323.1	u	0.121577	-0.22487	Chr01	.	28348802	28349021	1	220	MSTRG.2323	.
MSTRG.23250.1	x	0.00455034	-0.036864	Chr12	+	6004914	6005199	2	250	MSTRG.23250	Potri.012G057900
MSTRG.23261.1	u	0.00262254	-0.0004096	Chr12	.	6129110	6129325	1	216	MSTRG.23261	.
MSTRG.23279.1	u	0.052276	-0.0479232	Chr12	.	6606193	6606600	1	408	MSTRG.23279	.
MSTRG.23282.1	u	0.0327948	-0.0229376	Chr12	.	6621216	6621490	1	275	MSTRG.23282	.
MSTRG.23283.1	u	0.0242558	-0.0913408	Chr12	.	6719157	6719373	1	217	MSTRG.23283	.
MSTRG.23287.1	u	0.0277905	-0.0004096	Chr12	.	6800021	6800251	1	231	MSTRG.23287	.
MSTRG.23292.1	u	0.00284419	-0.0004096	Chr12	.	7323278	7323487	1	210	MSTRG.23292	.
MSTRG.23294.1	u	0.0111402	-0.0004096	Chr12	.	7364566	7364848	1	283	MSTRG.23294	.
MSTRG.23305.1	u	1.10788e-05	-0.0004096	Chr12	.	8017220	8017446	1	227	MSTRG.23305	.
MSTRG.23309.1	u	0.00863261	-0.036864	Chr12	.	8120481	8120761	1	281	MSTRG.23309	.
MSTRG.23312.1	u	0.00812323	-0.106906	Chr12	.	8361762	8362085	1	324	MSTRG.23312	.
MSTRG.23314.1	u	0.0053006	-0.0004096	Chr12	.	8441381	8441774	1	394	MSTRG.23314	.
MSTRG.23321.1	u	0.00427262	-0.0004096	Chr12	.	8588929	8589163	1	235	MSTRG.23321	.
MSTRG.23325.1	u	0.00446433	-0.045056	Chr12	-	8652848	8653395	2	251	MSTRG.23325	.
MSTRG.23333.1	u	0.00288401	-0.0004096	Chr12	.	8800648	8800865	1	218	MSTRG.23333	.
MSTRG.23335.1	u	0.00645324	-0.0217088	Chr12	.	8807476	8807892	1	417	MSTRG.23335	.
MSTRG.23340.1	u	0.00344574	-0.262144	Chr12	.	8986876	8987166	1	291	MSTRG.23340	.
MSTRG.23343.1	x	0.174336	-0.236749	Chr12	-	8996823	8997269	3	333	MSTRG.23343	Potri.012G067900
MSTRG.23343.2	x	0.172512	-0.27607	Chr12	-	8996930	8997223	2	261	MSTRG.23343	Potri.012G067900
MSTRG.23344.1	u	0.0116374	-0.057344	Chr12	+	9056432	9056749	2	298	MSTRG.23344	.
MSTRG.2335.1	u	0.0115716	-0.0004096	Chr01	.	28453518	28454494	1	977	MSTRG.2335	.
MSTRG.23365.1	u	0.0109489	-0.0004096	Chr12	.	9424377	9424827	1	451	MSTRG.23365	.
MSTRG.2337.1	u	0.0108656	-0.1024	Chr01	.	28456811	28457110	1	300	MSTRG.2337	.
MSTRG.23371.1	u	0.00727764	-0.0004096	Chr12	-	9716266	9716888	2	457	MSTRG.23371	.
MSTRG.23384.1	u	0.0858385	-0.0098304	Chr12	.	9920738	9920983	1	246	MSTRG.23384	.
MSTRG.23422.1	u	0.0108682	-0.0004096	Chr12	.	10454828	10455062	1	235	MSTRG.23422	.
MSTRG.23430.1	x	0.0199165	-0.131072	Chr12	+	10489561	10490054	2	463	MSTRG.23430	Potri.012G079000
MSTRG.23434.1	u	0.134193	-0.024576	Chr12	-	10587868	10588556	2	629	MSTRG.23434	.
MSTRG.23438.1	x	0.0683439	-0.008192	Chr12	-	10635283	10637668	2	399	MSTRG.23438	Potri.012G080000
MSTRG.23468.1	u	0.185086	-0.073728	Chr12	.	11117904	11118308	1	405	MSTRG.23468	.
MSTRG.23471.1	i	0.0650753	-0.0323584	Chr12	.	11159909	11160400	1	492	MSTRG.23471	Potri.012G084200
MSTRG.23479.1	u	0.0238897	-0.0004096	Chr12	.	11271546	11271884	1	339	MSTRG.23479	.
MSTRG.23488.1	x	0.0162762	-0.0073728	Chr12	-	11272713	11288657	2	298	MSTRG.23488	Potri.012G085700
MSTRG.23491.1	u	0.046863	-0.200704	Chr12	.	11345147	11345986	1	840	MSTRG.23491	.
MSTRG.23495.1	x	0.0392638	-0.0004096	Chr12	-	11360962	11361200	2	213	MSTRG.23495	Potri.012G086600
MSTRG.23509.1	u	0.0591824	-0.012288	Chr12	-	11530908	11531892	2	836	MSTRG.23509	.
MSTRG.23515.1	u	0.0401653	-0.036864	Chr12	.	11582269	11583316	1	1048	MSTRG.23515	.
MSTRG.23524.1	x	0.0715008	-0.028672	Chr12	-	11667175	11680838	2	401	MSTRG.23524	Potri.012G089900
MSTRG.23525.1	x	0.00669217	-0.0925696	Chr12	-	11668541	11682135	2	267	MSTRG.23525	Potri.012G089900
MSTRG.23526.1	x	0.260192	-0.0528384	Chr12	-	11668999	11670998	4	755	MSTRG.23526	Potri.012G089900
MSTRG.23573.1	x	0.0534108	-0.0946176	Chr12	+	12134944	12145540	2	235	MSTRG.23573	Potri.012G095000
MSTRG.23574.1	x	0.00465	-0.157286	Chr12	+	12135770	12146427	2	290	MSTRG.23574	Potri.012G095000
MSTRG.23575.1	x	0.155144	-0.0249856	Chr12	+	12135934	12146615	2	314	MSTRG.23575	Potri.012G095000
MSTRG.23619.1	o	0.00945625	-0.065536	Chr12	+	12523916	12524665	2	633	MSTRG.23619	Potri.012G100100
MSTRG.23622.1	u	0.043854	-0.0004096	Chr12	.	12548114	12548445	1	332	MSTRG.23622	.
MSTRG.23625.1	u	0.0114531	-0.038912	Chr12	+	12560247	12562400	2	380	MSTRG.23625	.
MSTRG.23647.4	j	0.0603171	-0.004096	Chr12	+	12823468	12831474	2	206	MSTRG.23647	Potri.012G104000
MSTRG.2368.1	x	0.0158398	-0.098304	Chr01	-	28826714	28827769	4	757	MSTRG.2368	Potri.001G282000
MSTRG.23681.1	o	0.0143979	-0.16384	Chr12	-	13181389	13186309	2	268	MSTRG.23681	Potri.012G108800
MSTRG.23696.1	o	0.0195596	-0.0004096	Chr12	-	13245903	13275381	2	231	MSTRG.23696	Potri.012G110400
MSTRG.23713.1	x	0.00347969	-0.0004096	Chr12	+	13404934	13408609	2	229	MSTRG.23713	Potri.012G113100
MSTRG.23715.1	u	0.0260417	-0.016384	Chr12	-	13431402	13432716	1	1315	MSTRG.23715	.
MSTRG.23723.1	x	0.173024	-0.01024	Chr12	-	13453298	13457725	2	300	MSTRG.23723	Potri.012G113800
MSTRG.23725.1	u	0.0185825	-0.131072	Chr12	.	13479957	13480596	1	640	MSTRG.23725	.
MSTRG.2374.1	u	0.0284057	-0.0282624	Chr01	.	28925578	28926345	1	768	MSTRG.2374	.
MSTRG.23742.1	x	0.0204468	-0.0004096	Chr12	+	13609223	13609630	2	350	MSTRG.23742	Potri.012G115500
MSTRG.23743.1	u	0.157995	-0.016384	Chr12	+	13611890	13612858	1	969	MSTRG.23743	.
MSTRG.23750.1	x	0.0272742	-0.0004096	Chr12	+	13847558	13865185	2	207	MSTRG.23750	Potri.012G118100
MSTRG.23750.2	x	0.0172162	-0.0004096	Chr12	+	13847558	13865223	3	245	MSTRG.23750	Potri.012G118100
MSTRG.23750.3	u	0.0243913	-0.0004096	Chr12	+	13859859	13865223	2	266	MSTRG.23750	.
MSTRG.23764.1	o	0.0217644	-0.024576	Chr12	+	13874987	13882394	2	546	MSTRG.23764	Potri.012G118400
MSTRG.23765.1	o	0.0089755	-0.049152	Chr12	+	13876463	13883803	2	480	MSTRG.23765	Potri.012G118400
MSTRG.23768.1	u	0.170076	-0.114688	Chr12	+	13914124	13914504	1	381	MSTRG.23768	.
MSTRG.2377.1	i	0.0253784	-0.172032	Chr01	.	29146384	29146719	1	336	MSTRG.2377	Potri.001G285000
MSTRG.23793.1	x	0.00771821	-0.098304	Chr12	+	14083010	14095852	2	209	MSTRG.23793	Potri.012G121400
MSTRG.23800.3	i	0.0197189	-0.190874	Chr12	+	14297976	14299599	1	1624	MSTRG.23800	Potri.012G124000
MSTRG.23806.1	o	0.0137608	-0.0004096	Chr12	-	14371872	14393684	2	247	MSTRG.23806	Potri.012G125300
MSTRG.23822.1	o	0.00470212	-0.0008192	Chr12	-	14141045	14176417	3	465	MSTRG.23822	Potri.012G122300
MSTRG.23824.1	o	0.00999067	-0.0004096	Chr12	-	14157369	14190173	2	306	MSTRG.23824	Potri.012G122300
MSTRG.23825.1	o	0.00255336	-0.0311296	Chr12	-	14158277	14173869	2	210	MSTRG.23825	Potri.012G122300
MSTRG.23827.1	o	0.0635215	-0.0004096	Chr12	-	14192523	14248148	2	229	MSTRG.23827	Potri.012G123300
MSTRG.23829.1	i	0.245711	-0.0262144	Chr12	.	14195732	14197470	1	1739	MSTRG.23829	Potri.012G122700
MSTRG.23830.1	o	0.00382735	-0.0004096	Chr12	-	14201699	14269771	2	277	MSTRG.23830	Potri.012G123300
MSTRG.23832.1	u	0.0697482	-0.122061	Chr12	+	14213749	14214212	2	296	MSTRG.23832	.
MSTRG.23833.1	o	0.00682466	-0.0004096	Chr12	-	14222480	14264946	2	368	MSTRG.23833	Potri.012G123300
MSTRG.23837.1	x	0.0117382	-0.077824	Chr12	-	14505934	14506220	2	257	MSTRG.23837	Potri.012G127300
MSTRG.2384.1	x	0.00295972	-0.032768	Chr01	+	28942640	28950709	2	289	MSTRG.2384	Potri.001G283300
MSTRG.23846.1	u	0.010568	-0.0004096	Chr12	.	14575796	14576058	1	263	MSTRG.23846	.
MSTRG.2385.1	x	0.00751458	-0.446464	Chr01	+	28943649	28951703	2	295	MSTRG.2385	Potri.001G283300
MSTRG.2385.2	o	0.00758832	-0.446464	Chr01	+	28943652	28976829	2	244	MSTRG.2385	Potri.001G283600
MSTRG.23857.1	x	1.35764e-05	-0.0004096	Chr12	+	14616822	14617202	2	361	MSTRG.23857	Potri.012G129000
MSTRG.2388.1	o	0.035141	-0.0004096	Chr01	-	29016553	29069606	2	681	MSTRG.2388	Potri.001G283900
MSTRG.23884.1	x	0.0112133	-0.0827392	Chr12	+	14907474	14908130	2	309	MSTRG.23884	Potri.012G132500
MSTRG.23887.2	j	0.0478078	-0.0626688	Chr12	+	14980022	14982505	3	858	MSTRG.23887	Potri.012G133100
MSTRG.23891.1	x	0.0261441	-0.0004096	Chr12	-	14999956	15000273	2	282	MSTRG.23891	Potri.012G133400
MSTRG.2392.1	u	0.033852	-0.1024	Chr01	+	29068905	29069583	1	679	MSTRG.2392	.
MSTRG.23930.1	x	0.0253494	-0.0004096	Chr12	-	15381988	15388437	2	451	MSTRG.23930	Potri.012G139500
MSTRG.23933.1	x	0.0165364	-0.0315392	Chr12	+	15398157	15398457	2	268	MSTRG.23933	Potri.012G139800
MSTRG.23939.1	x	0.0121101	-0.0004096	Chr12	-	15427983	15428475	2	460	MSTRG.23939	Potri.012G140300
MSTRG.23951.1	u	0.00823326	-0.02048	Chr12	.	15598142	15598405	1	264	MSTRG.23951	.
MSTRG.23981.1	x	0.1658	-0.06144	Chr13	+	30891	31232	2	289	MSTRG.23981	Potri.013G000500
MSTRG.23982.1	u	0.0180665	-0.08192	Chr13	-	34766	35409	2	308	MSTRG.23982	.
MSTRG.23992.6	j	0.0270463	-0.069632	Chr13	+	108110	109173	3	630	MSTRG.23992	Potri.013G001600
MSTRG.24003.1	u	0.0122148	-0.073728	Chr13	.	227605	227920	1	316	MSTRG.24003	.
MSTRG.24005.1	x	1.07898e-05	-0.086016	Chr13	+	215172	226415	2	269	MSTRG.24005	Potri.013G003200
MSTRG.24026.1	x	0.0143384	-0.0004096	Chr13	-	359859	364234	2	256	MSTRG.24026	Potri.013G005600
MSTRG.24027.1	i	0.0187452	-0.0094208	Chr13	-	362945	363807	2	843	MSTRG.24027	Potri.013G005600
MSTRG.24086.1	u	0.0137426	-0.516096	Chr13	.	870246	871426	1	1181	MSTRG.24086	.
MSTRG.24100.1	x	0.0304139	-0.0118784	Chr13	+	947209	947809	2	574	MSTRG.24100	Potri.013G014900
MSTRG.24104.2	j	0.0323863	-0.0282624	Chr13	-	971918	974436	2	1341	MSTRG.24104	Potri.013G015400
MSTRG.24109.1	i	0.0443034	-0.028672	Chr13	+	987984	989520	2	1512	MSTRG.24109	Potri.013G015600
MSTRG.24114.1	x	4.95888e-07	-0.0581632	Chr13	+	1036497	1068936	2	268	MSTRG.24114	Potri.013G016300
MSTRG.24116.1	x	0.0195602	-0.053248	Chr13	+	1067624	1083458	2	221	MSTRG.24116	Potri.013G016500
MSTRG.24126.1	i	0.0133829	-0.090112	Chr13	-	1149842	1150212	1	371	MSTRG.24126	Potri.013G017600
MSTRG.24143.1	j	0.0786606	-0.024576	Chr13	-	1288902	1291524	4	671	MSTRG.24143	Potri.013G019700
MSTRG.24169.1	x	0.00894175	-0.012288	Chr13	-	1496435	1496733	2	266	MSTRG.24169	Potri.013G022600
MSTRG.24219.1	i	0.0280458	-0.0004096	Chr13	.	1924105	1924420	1	316	MSTRG.24219	Potri.013G029100
MSTRG.24221.1	x	0.0246685	-0.057344	Chr13	+	1933732	1934037	2	279	MSTRG.24221	Potri.013G029200
MSTRG.24229.1	u	0.0359603	-0.0606208	Chr13	-	2009907	2010990	4	746	MSTRG.24229	.
MSTRG.24234.1	x	0.00717812	-0.0438272	Chr13	+	2036173	2042934	2	216	MSTRG.24234	Potri.013G030800
MSTRG.24261.1	x	0.0656888	-0.0864256	Chr13	-	2283348	2287292	2	392	MSTRG.24261	Potri.013G034200
MSTRG.24266.1	u	0.0101219	-0.0237568	Chr13	.	2298535	2298834	1	300	MSTRG.24266	.
MSTRG.24273.2	o	0.0175042	-0.094208	Chr13	-	2366798	2367100	2	213	MSTRG.24273	Potri.013G035400
MSTRG.24278.1	x	0.00382329	-0.0004096	Chr13	+	2372384	2372683	2	274	MSTRG.24278	Potri.013G035500
MSTRG.24282.1	x	0.00570001	-0.169984	Chr13	-	2400729	2401075	2	311	MSTRG.24282	Potri.013G035800
MSTRG.24282.2	x	0.00485059	-0.169984	Chr13	-	2400729	2401067	2	303	MSTRG.24282	Potri.013G035800
MSTRG.24283.1	i	0.0110353	-0.0004096	Chr13	-	2413919	2414581	2	641	MSTRG.24283	Potri.013G035800
MSTRG.2429.1	u	0.0168706	-0.045056	Chr01	.	29702445	29702779	1	335	MSTRG.2429	.
MSTRG.24292.1	u	0.0665708	-0.0937984	Chr13	+	2516927	2517142	1	216	MSTRG.24292	.
MSTRG.24294.1	u	0.0239713	-0.331776	Chr13	.	2523990	2524674	1	685	MSTRG.24294	.
MSTRG.243.1	u	0.0687571	-0.12288	Chr01	.	2192232	2192583	1	352	MSTRG.243	.
MSTRG.24300.1	u	0.0195618	-0.278528	Chr13	.	2607312	2607604	1	293	MSTRG.24300	.
MSTRG.24305.1	o	0.0211758	-0.0233472	Chr13	-	2623263	2645424	2	236	MSTRG.24305	Potri.013G038500
MSTRG.24313.1	u	0.0354019	-0.032768	Chr13	+	2782658	2783481	1	824	MSTRG.24313	.
MSTRG.24316.1	x	0.0163799	-0.073728	Chr13	+	2722838	2723622	3	658	MSTRG.24316	Potri.013G039600
MSTRG.24317.1	u	0.0532471	-0.0155648	Chr13	.	2785624	2786172	1	549	MSTRG.24317	.
MSTRG.24328.1	u	0.164484	-0.069632	Chr13	-	2921303	2922440	2	630	MSTRG.24328	.
MSTRG.24329.1	u	0.0232966	-0.0004096	Chr13	-	2922835	2923317	1	483	MSTRG.24329	.
MSTRG.24342.3	j	0.490023	-0.0155648	Chr13	-	3046019	3048072	3	1119	MSTRG.24342	Potri.013G043200
MSTRG.24349.1	u	0.0110474	-0.0311296	Chr13	+	3130277	3130764	1	488	MSTRG.24349	.
MSTRG.24362.1	u	0.0240265	-0.14336	Chr13	.	3229686	3229937	1	252	MSTRG.24362	.
MSTRG.24369.1	x	0.0181156	-0.110592	Chr13	-	3326446	3326866	2	274	MSTRG.24369	Potri.013G046300
MSTRG.24370.1	u	0.00434419	-0.14336	Chr13	.	3349653	3349969	1	317	MSTRG.24370	.
MSTRG.24381.1	i	0.0441084	-0.0155648	Chr13	-	3418005	3420281	2	2210	MSTRG.24381	Potri.013G047300
MSTRG.24390.1	i	0.00659672	-0.0004096	Chr13	+	3474518	3474981	2	373	MSTRG.24390	Potri.013G047900
MSTRG.24394.1	i	0.0228614	-0.208896	Chr13	.	3498574	3499409	1	836	MSTRG.24394	Potri.013G048100
MSTRG.24407.1	o	0.0120765	-0.211763	Chr13	+	3621266	3673803	2	295	MSTRG.24407	Potri.013G049900
MSTRG.24437.1	x	0.259988	-0.0724992	Chr13	-	4026322	4027125	2	621	MSTRG.24437	Potri.013G054100
MSTRG.24437.2	x	0.0458752	-0.016384	Chr13	-	4026507	4027125	2	436	MSTRG.24437	Potri.013G054100
MSTRG.24446.1	o	0.0427561	-0.0356352	Chr13	+	4142587	4144145	2	1527	MSTRG.24446	Potri.013G055400
MSTRG.24466.1	o	0.0463705	-0.0208896	Chr13	+	4342595	4346396	2	454	MSTRG.24466	Potri.013G057800
MSTRG.24499.1	i	0.0247972	-0.057344	Chr13	+	4651431	4652400	2	935	MSTRG.24499	Potri.013G061500
MSTRG.2451.1	u	0.00481304	-0.0004096	Chr01	-	29815876	29816102	1	227	MSTRG.2451	.
MSTRG.24511.1	i	0.194618	-0.012288	Chr13	-	4779876	4780526	2	619	MSTRG.24511	Potri.013G062900
MSTRG.24519.1	u	0.0105288	-0.045056	Chr13	.	4935215	4935961	1	747	MSTRG.24519	.
MSTRG.24531.1	u	0.0214358	-0.0004096	Chr13	.	5061580	5061874	1	295	MSTRG.24531	.
MSTRG.24542.1	u	0.0356209	-0.0004096	Chr13	+	5123330	5126496	3	481	MSTRG.24542	.
MSTRG.24542.2	u	0.0291524	-0.094208	Chr13	+	5123355	5124588	3	1130	MSTRG.24542	.
MSTRG.24543.1	u	0.0759711	-0.0720896	Chr13	-	5125992	5126562	2	547	MSTRG.24543	.
MSTRG.24547.1	u	0.0229697	-0.222003	Chr13	.	5213468	5213731	1	264	MSTRG.24547	.
MSTRG.24548.1	u	0.0587045	-0.0004096	Chr13	.	5214904	5215183	1	280	MSTRG.24548	.
MSTRG.24571.1	o	0.0736087	-0.053248	Chr13	+	5601015	5722143	2	266	MSTRG.24571	Potri.013G069500
MSTRG.24594.1	o	0.0141729	-0.200704	Chr13	-	5942816	6019789	2	208	MSTRG.24594	Potri.013G071700
MSTRG.246.1	i	0.0110248	-0.0004096	Chr01	-	2167959	2168458	2	259	MSTRG.246	Potri.001G029600
MSTRG.24604.1	u	0.169532	-0.0004096	Chr13	.	6142774	6142989	1	216	MSTRG.24604	.
MSTRG.24616.1	x	0.0153848	-0.004096	Chr13	+	6310372	6323821	2	283	MSTRG.24616	Potri.013G074400
MSTRG.24629.1	x	0.0131272	-0.188416	Chr13	+	6576352	6585999	2	224	MSTRG.24629	Potri.013G076600
MSTRG.24630.1	x	0.00455272	-0.0004096	Chr13	+	6576481	6586112	2	208	MSTRG.24630	Potri.013G076600
MSTRG.24631.1	x	0.0320494	-0.069632	Chr13	+	6576907	6586629	2	299	MSTRG.24631	Potri.013G076600
MSTRG.24642.1	j	0.0543477	-0.034816	Chr13	+	6792208	6797568	7	1098	MSTRG.24642	Potri.013G078200
MSTRG.24650.1	u	0.00505926	-0.0004096	Chr13	.	6906739	6906944	1	206	MSTRG.24650	.
MSTRG.24662.1	x	0.0869644	-0.0180224	Chr13	+	7004820	7050950	2	295	MSTRG.24662	Potri.013G080400
MSTRG.24680.1	u	0.207159	-0.077824	Chr13	+	7381390	7383280	3	532	MSTRG.24680	.
MSTRG.24681.1	u	0.00421181	-0.0004096	Chr13	+	7383531	7383825	1	295	MSTRG.24681	.
MSTRG.24683.1	x	0.0222211	-0.0004096	Chr13	+	7511289	7517473	2	277	MSTRG.24683	Potri.013G082900
MSTRG.24692.1	u	0.0111142	-0.0004096	Chr13	.	7803408	7804024	1	617	MSTRG.24692	.
MSTRG.24698.1	x	0.0325516	-0.208896	Chr13	+	7843429	7843762	2	313	MSTRG.24698	Potri.013G084200
MSTRG.24712.1	u	0.0123543	-0.0004096	Chr13	.	8145076	8145342	1	267	MSTRG.24712	.
MSTRG.24713.1	u	0.150843	-0.0098304	Chr13	.	8160509	8160878	1	370	MSTRG.24713	.
MSTRG.24714.1	u	0.0199096	-0.069632	Chr13	.	8161367	8161731	1	365	MSTRG.24714	.
MSTRG.24728.1	u	0.0475631	-0.04096	Chr13	+	8540575	8541073	2	476	MSTRG.24728	.
MSTRG.24731.1	x	1.78729e-05	-0.0004096	Chr13	-	9231465	9231719	2	221	MSTRG.24731	Potri.013G088600
MSTRG.2475.1	u	0.0199082	-0.016384	Chr01	.	30065578	30065890	1	313	MSTRG.2475	.
MSTRG.24762.1	i	0.0281377	-0.131072	Chr13	+	10029678	10029974	1	297	MSTRG.24762	Potri.013G093500
MSTRG.24763.1	u	0.0524723	-0.057344	Chr13	.	10107715	10108086	1	372	MSTRG.24763	.
MSTRG.24764.1	u	0.015826	-0.0004096	Chr13	.	10110878	10111173	1	296	MSTRG.24764	.
MSTRG.24772.3	j	0.444894	-0.0376832	Chr13	-	10223488	10224471	2	584	MSTRG.24772	Potri.013G094500
MSTRG.24783.1	u	0.00907025	-0.0004096	Chr13	+	10391104	10391620	2	205	MSTRG.24783	.
MSTRG.24791.1	i	0.0211987	-0.0741376	Chr13	+	10476720	10478065	2	1318	MSTRG.24791	Potri.013G096600
MSTRG.24796.1	x	0.0140386	-0.077824	Chr13	-	10829047	10829580	3	416	MSTRG.24796	Potri.013G098900
MSTRG.24804.1	o	0.160694	-0.0004096	Chr13	-	10549357	10777960	2	294	MSTRG.24804	Potri.013G097500
MSTRG.24805.1	o	0.00380407	-0.0004096	Chr13	-	10630024	10766889	2	279	MSTRG.24805	Potri.013G097500
MSTRG.24807.1	x	0.143047	-0.053248	Chr13	-	10641052	10643719	2	295	MSTRG.24807	Potri.013G097300
MSTRG.24812.1	x	0.0366808	-0.0004096	Chr13	-	10685869	10726817	2	281	MSTRG.24812	Potri.013G097900
MSTRG.24816.6	j	0.0677944	-0.028672	Chr13	+	10947312	10949337	3	1167	MSTRG.24816	Potri.013G099600
MSTRG.24823.1	u	0.068807	-0.012288	Chr13	.	11244877	11245258	1	382	MSTRG.24823	.
MSTRG.24825.1	u	0.0120099	-0.0004096	Chr13	.	11346986	11347220	1	235	MSTRG.24825	.
MSTRG.2483.1	i	0.0128119	-0.0872448	Chr01	+	30084835	30085183	2	327	MSTRG.2483	Potri.001G296800
MSTRG.24838.1	x	0.0111751	-0.159334	Chr13	-	11547427	11547721	2	208	MSTRG.24838	Potri.013G102100
MSTRG.24841.1	u	0.0260244	-0.053248	Chr13	.	11611710	11612512	1	803	MSTRG.24841	.
MSTRG.24868.1	i	0.0122087	-0.0004096	Chr13	+	11931531	11933158	2	1392	MSTRG.24868	Potri.013G105700
MSTRG.24876.1	x	0.0060335	-0.0004096	Chr13	+	12007488	12030024	2	333	MSTRG.24876	Potri.013G106400
MSTRG.24876.2	x	0.0237848	-0.0004096	Chr13	+	12017767	12030048	2	426	MSTRG.24876	Potri.013G106400
MSTRG.24877.1	o	0.0480787	-0.004096	Chr13	-	12007923	12018537	2	264	MSTRG.24877	Potri.013G106400
MSTRG.24878.1	x	0.0319276	-0.1536	Chr13	+	12019203	12031306	2	253	MSTRG.24878	Potri.013G106400
MSTRG.24883.1	x	0.0330905	-0.0958464	Chr13	+	12082205	12092875	2	211	MSTRG.24883	Potri.013G107300
MSTRG.2491.1	u	0.00524636	-0.0004096	Chr01	.	30239818	30240085	1	268	MSTRG.2491	.
MSTRG.24917.1	i	0.00877561	-0.208896	Chr13	+	12488222	12488709	2	445	MSTRG.24917	Potri.013G111500
MSTRG.24960.1	x	0.0644184	-0.02048	Chr13	-	13032137	13032457	2	285	MSTRG.24960	Potri.013G117100
MSTRG.24963.1	i	0.0392628	-0.140902	Chr13	+	13043177	13043989	2	748	MSTRG.24963	Potri.013G117200
MSTRG.2499.1	i	0.00726721	-0.016384	Chr01	-	30288068	30288487	1	420	MSTRG.2499	Potri.001G298800
MSTRG.24991.1	o	0.036021	-0.0032768	Chr13	+	13431039	13545596	2	868	MSTRG.24991	Potri.013G121100
MSTRG.24993.1	x	0.00800669	-0.065536	Chr13	+	13495834	13644488	3	278	MSTRG.24993	Potri.013G121700
MSTRG.24995.2	j	0.0998433	-0.045056	Chr13	-	13552942	13554025	2	811	MSTRG.24995	Potri.013G121700
MSTRG.24998.1	x	0.026864	-0.0380928	Chr13	+	13589338	13642134	2	228	MSTRG.24998	Potri.013G122000
MSTRG.25025.1	x	0.0109663	-0.0004096	Chr13	-	13874958	13878367	2	387	MSTRG.25025	Potri.013G125800
MSTRG.25026.1	o	0.0240412	-0.04096	Chr13	-	13875435	13880691	3	1131	MSTRG.25026	Potri.013G126000
MSTRG.25038.1	i	0.0168828	-0.0004096	Chr13	.	14005508	14005729	1	222	MSTRG.25038	Potri.013G127400
MSTRG.2506.1	x	0.0174668	-0.172032	Chr01	-	30369123	30375853	2	299	MSTRG.2506	Potri.001G299500
MSTRG.25061.1	o	0.0111	-0.0004096	Chr13	+	14105110	14129245	2	370	MSTRG.25061	Potri.013G129000
MSTRG.25062.1	o	0.00550913	-0.0004096	Chr13	+	14106987	14131038	2	302	MSTRG.25062	Potri.013G129000
MSTRG.25063.1	o	0.00958816	-0.0004096	Chr13	+	14109660	14134995	2	399	MSTRG.25063	Potri.013G129000
MSTRG.25068.1	u	0.0142029	-0.0004096	Chr13	-	14120757	14121269	2	234	MSTRG.25068	.
MSTRG.25073.1	j	0.148094	-0.0098304	Chr13	+	14260387	14261677	4	823	MSTRG.25073	Potri.013G131200
MSTRG.25073.3	j	0.199268	-0.004096	Chr13	+	14260396	14261677	5	611	MSTRG.25073	Potri.013G131200
MSTRG.25080.1	x	0.0352448	-0.106906	Chr13	+	14280458	14280784	2	300	MSTRG.25080	Potri.013G131600
MSTRG.25086.1	x	0.00396306	-0.278528	Chr13	-	14350857	14351183	2	290	MSTRG.25086	Potri.013G132300
MSTRG.25089.1	u	0.0683616	-0.0507904	Chr13	.	14403440	14403761	1	322	MSTRG.25089	.
MSTRG.25091.1	u	0.0124193	-0.04096	Chr13	.	14406417	14406944	1	528	MSTRG.25091	.
MSTRG.25111.1	u	0.00529549	-0.0004096	Chr13	-	14971341	14971589	1	249	MSTRG.25111	.
MSTRG.25115.1	u	0.214743	-0.086016	Chr13	-	14999584	15001754	2	1477	MSTRG.25115	.
MSTRG.25115.2	u	0.25677	-0.02048	Chr13	-	14999586	15001754	2	1581	MSTRG.25115	.
MSTRG.25115.3	u	0.0944935	-0.02048	Chr13	-	14999725	15001745	2	1984	MSTRG.25115	.
MSTRG.25115.4	u	0.149992	-0.02048	Chr13	-	14999848	15001745	1	1898	MSTRG.25115	.
MSTRG.25117.1	u	0.0189194	-0.057344	Chr13	+	15036125	15036404	1	280	MSTRG.25117	.
MSTRG.25204.1	o	0.00574927	-0.057344	Chr13	+	15160680	15171321	2	239	MSTRG.25204	Potri.013G146500
MSTRG.25208.1	o	0.00948922	-0.045056	Chr13	+	15184482	15186186	2	421	MSTRG.25208	Potri.013G147100
MSTRG.25208.2	o	0.00682382	-0.0294912	Chr13	+	15184503	15186186	2	419	MSTRG.25208	Potri.013G147100
MSTRG.25208.3	j	0.0146913	-0.0319488	Chr13	+	15184536	15186184	2	1591	MSTRG.25208	Potri.013G147100
MSTRG.25210.1	x	0.0214652	-0.06144	Chr13	-	15179866	15181021	3	309	MSTRG.25210	Potri.013G147000
MSTRG.25210.2	x	0.0149272	-0.229376	Chr13	-	15180331	15181021	2	267	MSTRG.25210	Potri.013G147000
MSTRG.25221.1	i	0.0466044	-0.110592	Chr13	-	15271349	15271980	2	601	MSTRG.25221	Potri.013G148400
MSTRG.25232.2	j	0.0407604	-0.0077824	Chr13	+	15454664	15456399	5	728	MSTRG.25232	Potri.013G150400
MSTRG.25233.1	u	0.0169274	-0.06144	Chr13	.	15469045	15469326	1	282	MSTRG.25233	.
MSTRG.25246.1	x	0.013257	-0.079872	Chr13	+	15541607	15549268	2	297	MSTRG.25246	Potri.013G151400
MSTRG.25246.2	x	0.0131896	-0.0741376	Chr13	+	15541614	15556404	3	296	MSTRG.25246	Potri.013G151400
MSTRG.25246.3	x	0.0608523	-0.145408	Chr13	+	15545131	15549268	2	281	MSTRG.25246	Potri.013G151400
MSTRG.25247.1	x	0.00754911	-0.19497	Chr13	+	15542273	15546444	2	661	MSTRG.25247	Potri.013G151400
MSTRG.25262.1	x	0.0302763	-0.014336	Chr13	+	15668814	15670253	2	212	MSTRG.25262	Potri.013G153400
MSTRG.25282.1	u	0.0677885	-0.0004096	Chr13	.	15839187	15839664	1	478	MSTRG.25282	.
MSTRG.25299.5	j	0.0700609	-0.253952	Chr13	-	16055456	16057488	2	874	MSTRG.25299	Potri.013G158100
MSTRG.25300.1	x	0.0142538	-0.0004096	Chr13	+	16053083	16053372	3	233	MSTRG.25300	Potri.013G158100
MSTRG.25304.1	i	0.0415145	-0.098304	Chr13	+	16066087	16067345	2	1123	MSTRG.25304	Potri.013G158400
MSTRG.25312.1	x	0.00608339	-0.331776	Chr13	-	16130245	16160593	2	456	MSTRG.25312	Potri.013G159200
MSTRG.25319.1	i	0.0200127	-0.077824	Chr13	+	16197952	16198345	2	338	MSTRG.25319	Potri.013G160100
MSTRG.25324.1	i	0.042668	-0.0090112	Chr13	+	16228178	16229179	2	953	MSTRG.25324	Potri.013G160500
MSTRG.25330.1	u	0.0305937	-0.106496	Chr13	.	16269201	16269880	1	680	MSTRG.25330	.
MSTRG.25343.1	u	0.0220587	-0.770048	Chr14	.	180098	180385	1	288	MSTRG.25343	.
MSTRG.25345.1	u	0.00741505	-0.0004096	Chr14	.	164425	164850	1	426	MSTRG.25345	.
MSTRG.25349.1	u	0.0584739	-0.208896	Chr14	-	727470	728505	2	262	MSTRG.25349	.
MSTRG.2536.1	o	0.0152288	-0.0004096	Chr01	+	30643504	30689883	2	260	MSTRG.2536	Potri.001G303200
MSTRG.25369.1	u	0.0120175	-0.106906	Chr14	.	423860	424285	1	426	MSTRG.25369	.
MSTRG.2537.2	o	0.00782761	-0.024576	Chr01	-	30645658	30681639	2	327	MSTRG.2537	Potri.001G303100
MSTRG.25374.1	u	0.0314008	-0.049152	Chr14	-	485870	486681	2	343	MSTRG.25374	.
MSTRG.2538.1	o	0.00881664	-0.098304	Chr01	+	30661862	30669958	2	216	MSTRG.2538	Potri.001G303200
MSTRG.25388.1	u	0.00378016	-0.0200704	Chr14	-	577450	577780	1	331	MSTRG.25388	.
MSTRG.25391.1	o	0.00527115	-0.098304	Chr14	+	630573	663825	2	228	MSTRG.25391	Potri.014G005600
MSTRG.25394.1	u	0.148312	-0.006144	Chr14	.	1336744	1337972	1	1229	MSTRG.25394	.
MSTRG.25404.1	o	0.0114306	-0.053248	Chr14	-	772129	1071824	2	650	MSTRG.25404	Potri.014G010100
MSTRG.25404.2	u	0.0114773	-0.106496	Chr14	-	1065795	1071823	2	578	MSTRG.25404	.
MSTRG.25405.1	u	0.0167467	-0.0372736	Chr14	+	772137	772676	1	540	MSTRG.25405	.
MSTRG.25414.1	o	0.0366271	-0.121242	Chr14	-	847137	1277062	2	297	MSTRG.25414	Potri.014G010100
MSTRG.25425.1	x	0.0253222	-0.0749568	Chr14	-	926179	926892	2	542	MSTRG.25425	Potri.014G009200
MSTRG.25438.1	o	0.0203319	-0.258048	Chr14	+	1124960	1182531	2	259	MSTRG.25438	Potri.014G011200
MSTRG.25443.1	o	0.171249	-0.0004096	Chr14	+	1155134	1241378	2	216	MSTRG.25443	Potri.014G011700
MSTRG.25445.1	u	0.0102105	-0.233472	Chr14	.	1164882	1165121	1	240	MSTRG.25445	.
MSTRG.25458.1	i	0.0146106	-0.04096	Chr14	+	1460780	1461228	2	429	MSTRG.25458	Potri.014G014700
MSTRG.25488.2	j	0.0380506	-0.0294912	Chr14	-	1701337	1702896	3	670	MSTRG.25488	Potri.014G017700
MSTRG.25505.1	x	0.1686	-0.0598016	Chr14	+	1775472	1783052	2	291	MSTRG.25505	Potri.014G019400
MSTRG.25517.1	u	0.0198701	-0.0004096	Chr14	.	1930283	1930484	1	202	MSTRG.25517	.
MSTRG.25521.1	x	0.0859888	-0.036864	Chr14	-	1909946	1922796	2	296	MSTRG.25521	Potri.014G021800
MSTRG.25533.1	o	0.0062168	-0.0004096	Chr14	-	2025128	2032000	2	215	MSTRG.25533	Potri.014G023200
MSTRG.25548.1	o	0.126104	-0.02048	Chr14	-	2122797	2128226	2	546	MSTRG.25548	Potri.014G024900
MSTRG.25549.1	o	0.0502606	-0.0004096	Chr14	-	2124067	2128928	2	272	MSTRG.25549	Potri.014G024900
MSTRG.25557.1	x	0.0152804	-0.0004096	Chr14	-	2202148	2202623	2	315	MSTRG.25557	Potri.014G025700
MSTRG.25563.1	u	0.035452	-0.0004096	Chr14	.	2248614	2248874	1	261	MSTRG.25563	.
MSTRG.25567.1	u	0.0310306	-0.032768	Chr14	.	2289511	2290013	1	503	MSTRG.25567	.
MSTRG.25570.1	j	0.287619	-0.0241664	Chr14	+	2305252	2306257	2	885	MSTRG.25570	Potri.014G027200
MSTRG.25572.1	x	0.0904303	-0.0159744	Chr14	-	2362291	2374158	2	299	MSTRG.25572	Potri.014G027600
MSTRG.25590.1	x	1.59541e-05	-0.0004096	Chr14	+	2530192	2530618	2	211	MSTRG.25590	Potri.014G030000
MSTRG.25601.1	u	0.0162476	-0.0004096	Chr14	.	2683880	2684113	1	234	MSTRG.25601	.
MSTRG.25605.1	o	0.0144476	-0.0004096	Chr14	-	2594821	2625025	2	367	MSTRG.25605	Potri.014G031200
MSTRG.25605.2	o	0.0144309	-0.0004096	Chr14	-	2594886	2625038	2	315	MSTRG.25605	Potri.014G031200
MSTRG.25607.1	x	0.0267915	-0.004096	Chr14	+	2637342	2643516	2	250	MSTRG.25607	Potri.014G031800
MSTRG.25618.1	o	0.0103663	-0.0004096	Chr14	-	2696690	2756577	2	216	MSTRG.25618	Potri.014G033300
MSTRG.25618.2	x	0.00888269	-0.028672	Chr14	-	2743145	2756577	2	211	MSTRG.25618	Potri.014G033500
MSTRG.25619.1	o	0.0240564	-0.189645	Chr14	-	2697272	2757270	2	241	MSTRG.25619	Potri.014G033300
MSTRG.25620.1	o	0.0820171	-0.06144	Chr14	-	2698537	2792872	3	419	MSTRG.25620	Potri.014G033300
MSTRG.25621.1	o	0.0243827	-0.0004096	Chr14	-	2705041	2792002	2	280	MSTRG.25621	Potri.014G033300
MSTRG.25623.1	x	0.00472477	-0.0004096	Chr14	-	2744578	2757793	2	236	MSTRG.25623	Potri.014G033500
MSTRG.25624.1	j	0.0113855	-0.212992	Chr14	-	2758053	2759423	2	246	MSTRG.25624	Potri.014G033700
MSTRG.25642.1	x	0.0454275	-0.0192512	Chr14	-	2977134	2977511	2	283	MSTRG.25642	Potri.014G036500
MSTRG.25651.1	x	0.0331606	-0.0700416	Chr14	-	3036406	3053079	2	437	MSTRG.25651	Potri.014G037500
MSTRG.25653.1	x	0.0202707	-0.0004096	Chr14	-	3044809	3063200	2	217	MSTRG.25653	Potri.014G037500
MSTRG.25655.1	u	0.00552602	-0.02048	Chr14	.	3137020	3137458	1	439	MSTRG.25655	.
MSTRG.25657.1	x	0.137277	-0.0651264	Chr14	-	3108002	3125253	2	306	MSTRG.25657	Potri.014G038000
MSTRG.25658.1	x	0.00934782	-0.032768	Chr14	-	3108193	3125427	2	289	MSTRG.25658	Potri.014G038000
MSTRG.25670.1	x	0.014021	-0.004096	Chr14	+	3223329	3225842	2	1602	MSTRG.25670	Potri.014G039400
MSTRG.25670.2	x	0.013872	-0.004096	Chr14	+	3223329	3225853	2	1619	MSTRG.25670	Potri.014G039400
MSTRG.25670.3	x	0.182756	-0.0004096	Chr14	+	3224850	3225853	2	252	MSTRG.25670	Potri.014G039400
MSTRG.2571.1	x	0.0509006	-0.028672	Chr01	+	31130972	31155240	2	282	MSTRG.2571	Potri.001G308300
MSTRG.25721.1	x	0.00510008	-0.0659456	Chr14	-	3597518	3597934	2	297	MSTRG.25721	Potri.014G045300
MSTRG.25722.1	x	0.0434944	-0.0331776	Chr14	-	3597988	3598404	2	345	MSTRG.25722	Potri.014G045300
MSTRG.25742.1	x	0.0533775	-0.057344	Chr14	-	3975872	3976239	2	290	MSTRG.25742	Potri.014G049600
MSTRG.25742.2	x	0.0325253	-0.090112	Chr14	-	3975875	3976202	2	247	MSTRG.25742	Potri.014G049600
MSTRG.25747.1	o	0.0194521	-0.032768	Chr14	-	3817260	3906016	2	232	MSTRG.25747	Potri.014G048600
MSTRG.25751.1	o	0.147314	-0.0004096	Chr14	-	3852632	3956908	2	281	MSTRG.25751	Potri.014G048600
MSTRG.25786.1	x	0.0131837	-0.0004096	Chr14	-	4232383	4244040	2	243	MSTRG.25786	Potri.014G053700
MSTRG.25787.1	x	0.167115	-0.024576	Chr14	-	4233344	4244874	2	290	MSTRG.25787	Potri.014G053700
MSTRG.25796.1	u	0.00343352	-0.155648	Chr14	.	4334198	4334702	1	505	MSTRG.25796	.
MSTRG.25799.1	o	0.0127326	-0.0004096	Chr14	+	4298942	4314600	2	300	MSTRG.25799	Potri.014G055300
MSTRG.25800.1	o	0.00819342	-0.004096	Chr14	+	4299612	4315134	2	259	MSTRG.25800	Potri.014G055300
MSTRG.25801.1	o	0.0127237	-0.107315	Chr14	+	4300500	4320187	3	287	MSTRG.25801	Potri.014G055300
MSTRG.25815.1	i	0.0162788	-0.147456	Chr14	.	4439812	4440073	1	262	MSTRG.25815	Potri.014G057600
MSTRG.2582.1	u	0.0300511	-0.057344	Chr01	+	31331897	31332661	2	726	MSTRG.2582	.
MSTRG.25821.1	u	0.0215939	-0.180224	Chr14	+	4480040	4480241	1	202	MSTRG.25821	.
MSTRG.25823.1	x	0.125742	-0.0004096	Chr14	-	4482412	4488045	2	270	MSTRG.25823	Potri.014G058000
MSTRG.25832.1	u	0.032021	-0.032768	Chr14	.	4617862	4618513	1	652	MSTRG.25832	.
MSTRG.25845.1	o	0.0190454	-0.0004096	Chr14	+	4716909	4737996	2	291	MSTRG.25845	Potri.014G061100
MSTRG.25847.1	x	0.0209196	-0.024576	Chr14	-	4781105	4789419	2	295	MSTRG.25847	Potri.014G061900
MSTRG.25852.1	u	0.0216833	-0.0618496	Chr14	.	4956347	4956660	1	314	MSTRG.25852	.
MSTRG.25853.1	u	0.0111641	-0.065536	Chr14	.	4958217	4958508	1	292	MSTRG.25853	.
MSTRG.25859.1	i	0.0561577	-0.196608	Chr14	.	5284522	5284788	1	267	MSTRG.25859	Potri.014G065500
MSTRG.25874.1	o	0.0157697	-0.065536	Chr14	+	5033233	5224794	4	515	MSTRG.25874	Potri.014G063400
MSTRG.25874.2	o	0.013325	-0.065536	Chr14	+	5075063	5224791	4	505	MSTRG.25874	Potri.014G064000
MSTRG.25875.1	x	0.0228109	-0.014336	Chr14	+	5036439	5058638	2	255	MSTRG.25875	Potri.014G063300
MSTRG.25877.1	i	0.0256862	-0.18391	Chr14	-	5058408	5058642	1	235	MSTRG.25877	Potri.014G063300
MSTRG.25881.1	o	0.0235204	-0.110182	Chr14	+	5102747	5151139	2	284	MSTRG.25881	Potri.014G064000
MSTRG.25885.1	u	0.0334222	-0.032768	Chr14	.	5155756	5156278	1	523	MSTRG.25885	.
MSTRG.25886.1	x	0.0261746	-0.203162	Chr14	+	5190344	5224479	2	279	MSTRG.25886	Potri.014G064500
MSTRG.25916.1	u	0.00999261	-0.026624	Chr14	+	5691048	5692935	2	1771	MSTRG.25916	.
MSTRG.25939.1	u	0.00812513	-0.344064	Chr14	-	5813729	5814076	1	348	MSTRG.25939	.
MSTRG.25940.1	x	0.00283975	-0.0606208	Chr14	-	5821348	5836605	2	282	MSTRG.25940	Potri.014G072100
MSTRG.2596.1	u	0.0275371	-0.0925696	Chr01	.	31473049	31473287	1	239	MSTRG.2596	.
MSTRG.25984.1	i	0.0118739	-0.0024576	Chr14	.	6222644	6222853	1	210	MSTRG.25984	Potri.014G077300
MSTRG.25997.1	u	0.0104752	-0.0004096	Chr14	.	6318416	6318631	1	216	MSTRG.25997	.
MSTRG.25998.1	u	0.00644575	-0.135168	Chr14	-	6321038	6321643	2	571	MSTRG.25998	.
MSTRG.25999.1	u	0.0330506	-0.086016	Chr14	+	6321334	6321643	1	310	MSTRG.25999	.
MSTRG.26003.2	j	0.430206	-0.0684032	Chr14	-	6333177	6335069	3	1239	MSTRG.26003	Potri.014G078900
MSTRG.26037.1	x	0.00313746	-0.211763	Chr14	+	6540786	6541382	4	363	MSTRG.26037	Potri.014G082600
MSTRG.26037.2	x	0.00313746	-0.558694	Chr14	+	6541101	6541382	2	222	MSTRG.26037	Potri.014G082600
MSTRG.26063.1	u	0.0314201	-0.0139264	Chr14	-	6756944	6757483	1	540	MSTRG.26063	.
MSTRG.26073.1	x	0.0763222	-0.22528	Chr14	-	6815497	6815839	2	298	MSTRG.26073	Potri.014G086500
MSTRG.26074.1	u	0.0415798	-0.233472	Chr14	-	6842730	6843753	1	1024	MSTRG.26074	.
MSTRG.26077.1	u	0.130597	-0.036864	Chr14	+	6868537	6868739	1	203	MSTRG.26077	.
MSTRG.2612.1	x	0.0043844	-0.0004096	Chr01	+	31888153	31890144	2	211	MSTRG.2612	Potri.001G313000
MSTRG.26120.1	i	0.0357958	-0.0135168	Chr14	-	7145396	7145660	1	265	MSTRG.26120	Potri.014G091300
MSTRG.26161.1	u	0.010342	-0.0004096	Chr14	.	7572530	7572747	1	218	MSTRG.26161	.
MSTRG.26185.1	u	0.0788288	-0.0536576	Chr14	.	7776999	7777272	1	274	MSTRG.26185	.
MSTRG.26190.1	u	0.0429845	-0.069632	Chr14	-	7846056	7846577	2	363	MSTRG.26190	.
MSTRG.26195.1	x	0.0385605	-0.0405504	Chr14	-	7871244	7873573	2	1253	MSTRG.26195	Potri.014G100600
MSTRG.262.1	x	0.0153444	-0.0004096	Chr01	-	2332870	2333355	2	397	MSTRG.262	Potri.001G031700
MSTRG.26206.1	x	0.00681156	-0.02048	Chr14	-	7948638	7949370	2	433	MSTRG.26206	Potri.014G101700
MSTRG.2621.1	x	0.00891227	-0.0290816	Chr01	-	31983372	31984043	2	609	MSTRG.2621	Potri.001G314100
MSTRG.26221.1	u	0.0213577	-0.0425984	Chr14	-	8102916	8117259	2	424	MSTRG.26221	.
MSTRG.26221.2	x	0.0463624	-0.0458752	Chr14	-	8102916	8118509	2	1644	MSTRG.26221	Potri.014G103100
MSTRG.26221.3	x	0.174139	-0.0458752	Chr14	-	8102979	8119114	2	2195	MSTRG.26221	Potri.014G103200
MSTRG.26237.1	u	0.197296	-0.106906	Chr14	-	8288382	8289875	2	273	MSTRG.26237	.
MSTRG.26242.1	x	0.00700366	-0.073728	Chr14	-	8309711	8327372	2	226	MSTRG.26242	Potri.014G105600
MSTRG.26249.9	o	0.0101744	-0.13312	Chr14	+	8385777	8386439	2	639	MSTRG.26249	Potri.014G106400
MSTRG.2627.1	u	0.0527574	-0.08192	Chr01	.	32098989	32100780	1	1792	MSTRG.2627	.
MSTRG.26315.1	x	0.0128375	-0.0004096	Chr14	+	8848254	8864368	2	284	MSTRG.26315	Potri.014G113200
MSTRG.26316.1	x	0.121773	-0.0278528	Chr14	+	8849502	8865585	2	255	MSTRG.26316	Potri.014G113200
MSTRG.26317.1	x	0.00849362	-0.004096	Chr14	+	8850940	8867068	2	299	MSTRG.26317	Potri.014G113200
MSTRG.2634.1	u	0.32239	-0.0045056	Chr01	.	32132180	32134547	1	2368	MSTRG.2634	.
MSTRG.26353.1	u	0.00507662	-0.0774144	Chr14	.	9191232	9191444	1	213	MSTRG.26353	.
MSTRG.26356.1	u	0.0293402	-0.108134	Chr14	+	9182944	9184426	4	520	MSTRG.26356	.
MSTRG.26369.1	i	0.0814489	-0.0176128	Chr14	+	9300055	9300508	2	412	MSTRG.26369	Potri.014G120300
MSTRG.26372.2	o	0.0332264	-0.004096	Chr14	+	9306619	9308402	2	708	MSTRG.26372	Potri.014G120500
MSTRG.26384.1	o	0.0109805	-0.0004096	Chr14	-	9379901	9412218	2	206	MSTRG.26384	Potri.014G121500
MSTRG.26404.1	i	0.0111962	-0.139264	Chr14	-	9563209	9563416	1	208	MSTRG.26404	Potri.014G123800
MSTRG.26423.1	o	0.026181	-0.0004096	Chr14	-	9704824	9716195	2	439	MSTRG.26423	Potri.014G126400
MSTRG.26424.1	o	0.0724303	-0.0004096	Chr14	-	9705165	9716503	3	379	MSTRG.26424	Potri.014G126400
MSTRG.26425.1	o	0.00658059	-0.0503808	Chr14	-	9705708	9717163	2	542	MSTRG.26425	Potri.014G126400
MSTRG.26425.2	o	0.00759272	-0.144179	Chr14	-	9705708	9717163	2	542	MSTRG.26425	Potri.014G126400
MSTRG.26438.1	i	0.0605232	-0.114688	Chr14	-	9796728	9797361	1	634	MSTRG.26438	Potri.014G127900
MSTRG.26475.2	j	0.00255307	-0.04096	Chr14	+	10046626	10047124	2	263	MSTRG.26475	Potri.014G132100
MSTRG.26477.1	x	1.40643e-05	-0.02048	Chr14	+	10049987	10050427	2	317	MSTRG.26477	Potri.014G132200
MSTRG.26478.1	u	0.00582497	-0.0004096	Chr14	.	10061087	10061436	1	350	MSTRG.26478	.
MSTRG.26489.1	u	0.00902562	-0.0004096	Chr14	+	10165242	10165475	1	234	MSTRG.26489	.
MSTRG.2649.1	i	0.0330191	-0.0004096	Chr01	.	32243378	32243598	1	221	MSTRG.2649	Potri.001G317400
MSTRG.26509.1	x	0.00361873	-0.0421888	Chr14	-	10319789	10320087	2	272	MSTRG.26509	Potri.014G135500
MSTRG.26513.1	x	0.0296692	-0.0569344	Chr14	+	10357065	10357576	2	410	MSTRG.26513	Potri.014G135800
MSTRG.26516.1	u	0.0146051	-0.0159744	Chr14	+	10397141	10398137	2	913	MSTRG.26516	.
MSTRG.26519.1	x	0.0225694	-0.024576	Chr14	-	10434999	10435398	2	259	MSTRG.26519	Potri.014G136400
MSTRG.26522.1	i	0.0474641	-0.0200704	Chr14	.	10444308	10444716	1	409	MSTRG.26522	Potri.014G136600
MSTRG.2653.1	u	0.00937465	-0.0004096	Chr01	-	32271138	32273190	2	332	MSTRG.2653	.
MSTRG.26532.1	i	0.00919506	-0.028672	Chr14	+	10521018	10521373	2	333	MSTRG.26532	Potri.014G137700
MSTRG.26549.2	o	0.0347032	-0.012288	Chr14	+	10661306	10662183	2	855	MSTRG.26549	Potri.014G139800
MSTRG.26579.1	i	0.0258109	-0.045056	Chr14	+	10871367	10872953	2	1564	MSTRG.26579	Potri.014G142700
MSTRG.26587.1	i	0.0624746	-0.0712704	Chr14	+	10959964	10960594	2	465	MSTRG.26587	Potri.014G143600
MSTRG.26610.1	x	0.00261818	-0.045056	Chr14	-	11159097	11159648	2	297	MSTRG.26610	Potri.014G146200
MSTRG.2662.1	j	0.00584934	-0.079872	Chr01	+	32395821	32399781	4	493	MSTRG.2662	Potri.001G319300
MSTRG.2662.7	j	0.00589906	-0.004096	Chr01	+	32395868	32399754	4	551	MSTRG.2662	Potri.001G319300
MSTRG.2662.8	j	0.00577873	-0.004096	Chr01	+	32395893	32399772	5	673	MSTRG.2662	Potri.001G319300
MSTRG.2662.9	j	0.00578453	-0.004096	Chr01	+	32395893	32396930	3	461	MSTRG.2662	Potri.001G319300
MSTRG.26624.1	x	0.0145652	-0.0004096	Chr14	+	11265986	11276948	2	275	MSTRG.26624	Potri.014G147400
MSTRG.26635.1	x	0.0149756	-0.24576	Chr14	-	11408066	11409180	2	984	MSTRG.26635	Potri.014G149200
MSTRG.26645.1	i	0.0293358	-0.106496	Chr14	-	11509736	11510942	2	955	MSTRG.26645	Potri.014G150100
MSTRG.26655.1	u	0.0386217	-0.118374	Chr14	+	11655747	11657222	2	1363	MSTRG.26655	.
MSTRG.26659.1	u	0.00465715	-0.192922	Chr14	.	11812598	11812997	1	400	MSTRG.26659	.
MSTRG.2669.1	x	9.91964e-06	-0.1024	Chr01	-	32447302	32447566	2	229	MSTRG.2669	Potri.001G319900
MSTRG.26693.1	u	0.0064029	-0.0004096	Chr14	.	12198061	12198300	1	240	MSTRG.26693	.
MSTRG.26711.1	i	0.0201777	-0.0004096	Chr14	+	12307262	12307563	1	302	MSTRG.26711	Potri.014G157800
MSTRG.26713.1	o	9.08041e-06	-0.110592	Chr14	+	12311913	12339776	2	219	MSTRG.26713	Potri.014G158200
MSTRG.26748.1	i	0.0127375	-0.114688	Chr14	-	12796699	12797266	1	568	MSTRG.26748	Potri.014G162400
MSTRG.26772.2	j	0.0374062	-0.0364544	Chr14	-	13086042	13089989	2	3824	MSTRG.26772	Potri.014G165300
MSTRG.26777.1	x	0.124785	-0.0004096	Chr14	+	13138222	13138495	2	202	MSTRG.26777	Potri.014G165600
MSTRG.26787.2	j	0.130809	-0.0176128	Chr14	+	13272185	13273092	2	789	MSTRG.26787	Potri.014G167300
MSTRG.26792.1	x	0.0244179	-0.0393216	Chr14	-	13323360	13376350	2	733	MSTRG.26792	Potri.014G167600
MSTRG.26805.1	o	0.0415145	-0.028672	Chr14	+	13556029	13572293	2	808	MSTRG.26805	Potri.014G169700
MSTRG.26852.1	u	0.00531335	-0.04096	Chr14	.	14314522	14314831	1	310	MSTRG.26852	.
MSTRG.26853.1	u	0.00367918	-0.0004096	Chr14	.	14316127	14316445	1	319	MSTRG.26853	.
MSTRG.26869.1	u	0.0136076	-0.0004096	Chr14	.	14562386	14562640	1	255	MSTRG.26869	.
MSTRG.2689.1	i	0.00787278	-0.0004096	Chr01	.	32701295	32701517	1	223	MSTRG.2689	Potri.001G323000
MSTRG.26897.1	i	0.0889592	-0.0069632	Chr14	+	15189306	15189794	2	463	MSTRG.26897	Potri.014G180700
MSTRG.26902.1	u	0.0686933	-0.110592	Chr14	.	15314537	15315377	1	841	MSTRG.26902	.
MSTRG.26906.1	u	0.131215	-0.0217088	Chr14	-	15349704	15350749	2	395	MSTRG.26906	.
MSTRG.26908.1	u	0.0135159	-0.0331776	Chr14	.	15405944	15406469	1	526	MSTRG.26908	.
MSTRG.26921.1	u	0.0963711	-0.0311296	Chr14	.	16297428	16298576	1	1149	MSTRG.26921	.
MSTRG.2693.1	u	0.00501646	-0.172032	Chr01	.	32743551	32743862	1	312	MSTRG.2693	.
MSTRG.26933.1	u	0.0497085	-0.073728	Chr14	.	15928722	15929030	1	309	MSTRG.26933	.
MSTRG.26940.1	u	0.0181928	-0.06144	Chr14	.	16496779	16497519	1	741	MSTRG.26940	.
MSTRG.26941.1	u	0.0523216	-0.1024	Chr14	.	16497845	16498456	1	612	MSTRG.26941	.
MSTRG.26943.1	u	0.0299223	-0.0032768	Chr14	-	16501724	16502664	2	775	MSTRG.26943	.
MSTRG.26948.1	i	0.00617864	-0.086016	Chr14	+	17224388	17225700	2	854	MSTRG.26948	Potri.014G189500
MSTRG.26953.1	u	0.0293408	-0.0733184	Chr14	.	16880624	16880865	1	242	MSTRG.26953	.
MSTRG.26973.1	u	0.178995	-0.0004096	Chr14	.	17324758	17325005	1	248	MSTRG.26973	.
MSTRG.26976.1	u	0.00447869	-0.0004096	Chr14	.	17458398	17458697	1	300	MSTRG.26976	.
MSTRG.26987.1	o	0.0284105	-0.08192	Chr14	-	17687381	17730810	2	283	MSTRG.26987	Potri.014G191800
MSTRG.26996.1	u	1.83564e-05	-0.0004096	Chr14	+	17999091	17999301	1	211	MSTRG.26996	.
MSTRG.27005.1	i	0.00886592	-0.0004096	Chr14	.	18219767	18220018	1	252	MSTRG.27005	Potri.014G194500
MSTRG.27017.1	x	0.0216876	-0.045056	Chr14	-	18486834	18487149	2	203	MSTRG.27017	Potri.014G195700
MSTRG.2702.1	u	0.0226301	-0.0004096	Chr01	-	32858883	32859430	1	548	MSTRG.2702	.
MSTRG.27026.1	j	0.0730722	-0.0270336	Chr14	-	18755466	18758836	3	503	MSTRG.27026	Potri.014G197000
MSTRG.27026.2	j	0.166647	-0.0196608	Chr14	-	18756476	18758832	3	504	MSTRG.27026	Potri.014G197000
MSTRG.27055.1	x	0.0166358	-0.032768	Chr15	-	63461	75944	2	232	MSTRG.27055	Potri.015G001200
MSTRG.27065.1	u	0.048986	-0.0446464	Chr15	+	152536	160280	3	484	MSTRG.27065	.
MSTRG.27066.1	u	0.0161923	-0.06144	Chr15	.	153319	153531	1	213	MSTRG.27066	.
MSTRG.27067.1	u	0.0100082	-0.136806	Chr15	.	154827	155184	1	358	MSTRG.27067	.
MSTRG.27068.1	u	0.0781619	-0.118784	Chr15	.	159298	159563	1	266	MSTRG.27068	.
MSTRG.27069.1	u	0.0289819	-0.110592	Chr15	+	160352	160678	1	327	MSTRG.27069	.
MSTRG.27072.1	u	0.0109018	-0.0004096	Chr15	.	197657	197883	1	227	MSTRG.27072	.
MSTRG.27080.1	x	0.0569183	-0.0004096	Chr15	+	238164	238576	2	205	MSTRG.27080	Potri.015G003100
MSTRG.27089.1	x	0.0104269	-0.0004096	Chr15	+	293083	293342	2	238	MSTRG.27089	Potri.015G004400
MSTRG.27121.1	u	0.0680473	-0.0557056	Chr15	.	543625	545462	1	1838	MSTRG.27121	.
MSTRG.27125.1	u	0.192333	-0.090112	Chr15	.	586441	587797	1	1357	MSTRG.27125	.
MSTRG.27127.1	u	0.00780269	-0.049152	Chr15	.	589224	589821	1	598	MSTRG.27127	.
MSTRG.27143.1	x	0.0329598	-0.0540672	Chr15	-	721487	722421	2	298	MSTRG.27143	Potri.015G010900
MSTRG.27149.1	j	0.0486587	-0.057344	Chr15	-	743810	750917	5	3063	MSTRG.27149	Potri.015G011400
MSTRG.27149.2	j	0.0486587	-0.057344	Chr15	-	743822	750900	4	2956	MSTRG.27149	Potri.015G011400
MSTRG.27149.4	j	0.0166674	-0.077824	Chr15	-	745687	750917	2	2573	MSTRG.27149	Potri.015G011400
MSTRG.27150.1	x	0.0150753	-0.454656	Chr15	-	748471	749002	2	488	MSTRG.27150	Potri.015G011300
MSTRG.27175.1	u	0.0072811	-0.0004096	Chr15	.	1081667	1081885	1	219	MSTRG.27175	.
MSTRG.27176.1	j	0.0287509	-0.0110592	Chr15	+	1013263	1032547	7	547	MSTRG.27176	Potri.015G014900
MSTRG.27180.1	j	0.088661	-0.0270336	Chr15	-	1246111	1248110	2	1915	MSTRG.27180	Potri.015G017400
MSTRG.27184.1	x	0.0482657	-0.107725	Chr15	+	1164615	1175229	2	417	MSTRG.27184	Potri.015G016600
MSTRG.27190.1	u	0.0187389	-0.002048	Chr15	.	1290013	1290251	1	239	MSTRG.27190	.
MSTRG.27193.1	x	0.116796	-0.004096	Chr15	-	1268406	1268719	2	236	MSTRG.27193	Potri.015G017500
MSTRG.27199.8	j	0.0863419	-0.0036864	Chr15	-	1392662	1394469	5	660	MSTRG.27199	Potri.015G019500
MSTRG.27199.9	j	0.067665	-0.016384	Chr15	-	1392668	1394476	3	1000	MSTRG.27199	Potri.015G019500
MSTRG.27210.1	u	0.00819512	-0.0004096	Chr15	.	1541158	1541394	1	237	MSTRG.27210	.
MSTRG.27222.1	i	1.14718e-05	-0.0004096	Chr15	.	1774263	1774501	1	239	MSTRG.27222	Potri.015G023000
MSTRG.27235.1	x	0.100003	-0.165478	Chr15	-	1890373	1890616	2	208	MSTRG.27235	Potri.015G024300
MSTRG.27238.1	u	7.54862e-07	-0.0700416	Chr15	-	2056890	2057416	2	291	MSTRG.27238	.
MSTRG.27240.1	o	0.00964098	-0.0004096	Chr15	-	1908606	1954411	3	483	MSTRG.27240	Potri.015G024900
MSTRG.27242.1	o	0.162146	-0.049152	Chr15	-	1910804	1977885	4	515	MSTRG.27242	Potri.015G024900
MSTRG.27243.1	o	0.136721	-0.02048	Chr15	-	1910985	1955911	2	318	MSTRG.27243	Potri.015G024900
MSTRG.27244.1	o	0.00667823	-0.0180224	Chr15	-	1911395	1978537	3	582	MSTRG.27244	Potri.015G024900
MSTRG.27249.1	o	0.0443126	-0.016384	Chr15	-	1966896	2016388	2	295	MSTRG.27249	Potri.015G025500
MSTRG.27250.1	o	0.0156316	-0.114688	Chr15	-	1967900	2017326	2	229	MSTRG.27250	Potri.015G025500
MSTRG.27252.2	j	0.21312	-0.045056	Chr15	-	1986509	2009823	3	668	MSTRG.27252	Potri.015G025500
MSTRG.27252.3	j	0.217401	-0.053248	Chr15	-	1986554	1987547	3	570	MSTRG.27252	Potri.015G025500
MSTRG.27252.4	j	0.0989862	-0.049152	Chr15	-	1986818	2009823	3	359	MSTRG.27252	Potri.015G025500
MSTRG.27252.5	j	0.0934983	-0.04096	Chr15	-	1997470	2009823	4	537	MSTRG.27252	Potri.015G025700
MSTRG.27252.6	j	0.026078	-0.053248	Chr15	-	1997470	2009823	4	657	MSTRG.27252	Potri.015G025700
MSTRG.27252.7	j	0.0222165	-0.0004096	Chr15	-	1998709	2009823	2	269	MSTRG.27252	Potri.015G025700
MSTRG.2727.1	o	0.0311017	-0.0004096	Chr01	-	33038699	33076243	2	257	MSTRG.2727	Potri.001G326600
MSTRG.2728.1	o	0.0426058	-0.04096	Chr01	-	33039555	33077139	2	297	MSTRG.2728	Potri.001G326600
MSTRG.2730.1	o	0.204351	-0.0442368	Chr01	-	33040867	33078566	3	394	MSTRG.2730	Potri.001G326600
MSTRG.27305.1	i	0.0639033	-0.0028672	Chr15	+	2733894	2734790	2	786	MSTRG.27305	Potri.015G033300
MSTRG.27307.1	i	0.00977957	-0.0004096	Chr15	-	2748803	2749493	2	517	MSTRG.27307	Potri.015G033400
MSTRG.27311.1	u	0.0219541	-0.303104	Chr15	+	2904754	2905594	2	708	MSTRG.27311	.
MSTRG.27313.1	u	0.0165696	-0.376832	Chr15	.	2880781	2881148	1	368	MSTRG.27313	.
MSTRG.27314.1	u	0.0846709	-0.065536	Chr15	+	2909801	2910222	2	289	MSTRG.27314	.
MSTRG.27315.1	u	0.0489516	-0.08192	Chr15	.	2921982	2922432	1	451	MSTRG.27315	.
MSTRG.27320.1	x	0.0196846	-0.012288	Chr15	-	2969019	2969391	2	273	MSTRG.27320	Potri.015G034600
MSTRG.27326.1	i	0.0603812	-0.0004096	Chr15	+	3058456	3058813	2	205	MSTRG.27326	Potri.015G035300
MSTRG.27336.1	u	0.163693	-0.0217088	Chr15	-	3209503	3215114	2	1030	MSTRG.27336	.
MSTRG.27348.1	u	0.00892464	-0.0004096	Chr15	.	3307293	3307630	1	338	MSTRG.27348	.
MSTRG.2735.1	i	0.013954	-0.0004096	Chr01	.	33189023	33189339	1	317	MSTRG.2735	Potri.001G327800
MSTRG.27350.1	i	0.0177807	-0.073728	Chr15	-	3267989	3268856	2	848	MSTRG.27350	Potri.015G037000
MSTRG.27353.1	i	0.00260718	-0.0004096	Chr15	+	3358626	3358882	2	231	MSTRG.27353	Potri.015G037800
MSTRG.27356.1	u	0.00756377	-0.147456	Chr15	-	3385978	3387922	2	828	MSTRG.27356	.
MSTRG.27356.2	u	0.00718322	-0.270336	Chr15	-	3385978	3387922	2	897	MSTRG.27356	.
MSTRG.27356.3	u	0.0067583	-0.270336	Chr15	-	3385978	3387922	2	823	MSTRG.27356	.
MSTRG.27356.4	u	0.00687752	-0.270336	Chr15	-	3385978	3387922	2	892	MSTRG.27356	.
MSTRG.27377.1	i	0.0220709	-0.008192	Chr15	.	3751000	3751433	1	434	MSTRG.27377	Potri.015G040500
MSTRG.27379.1	u	0.00925289	-0.0004096	Chr15	-	3878897	3879247	2	325	MSTRG.27379	.
MSTRG.27386.1	u	0.0445585	-0.0086016	Chr15	+	3959441	3960649	1	1209	MSTRG.27386	.
MSTRG.27386.2	u	0.12449	-0.0086016	Chr15	+	3959441	3960118	2	652	MSTRG.27386	.
MSTRG.27387.1	u	0.0172045	-0.0004096	Chr15	-	3960246	3960649	1	404	MSTRG.27387	.
MSTRG.27402.1	u	0.0553239	-0.0004096	Chr15	.	4224593	4224916	1	324	MSTRG.27402	.
MSTRG.27403.1	u	0.0054399	-0.0004096	Chr15	.	4225168	4225532	1	365	MSTRG.27403	.
MSTRG.2741.1	o	0.0948707	-0.012288	Chr01	-	33286839	33287744	2	856	MSTRG.2741	Potri.001G328800
MSTRG.27410.1	x	0.00595162	-0.0004096	Chr15	+	4300045	4339552	2	291	MSTRG.27410	Potri.015G043500
MSTRG.27411.1	x	0.00684169	-0.08192	Chr15	+	4300718	4340249	2	296	MSTRG.27411	Potri.015G043500
MSTRG.27418.1	u	0.00726001	-0.0933888	Chr15	.	4403163	4403633	1	471	MSTRG.27418	.
MSTRG.27428.1	x	0.0108238	-0.0565248	Chr15	+	4557014	4557796	2	722	MSTRG.27428	Potri.015G045800
MSTRG.27452.1	i	0.0108186	-0.0004096	Chr15	.	5325286	5325585	1	300	MSTRG.27452	Potri.015G049800
MSTRG.27455.1	u	0.017408	-0.0004096	Chr15	.	5464718	5465087	1	370	MSTRG.27455	.
MSTRG.27457.1	u	0.0333728	-0.135168	Chr15	.	5469766	5470005	1	240	MSTRG.27457	.
MSTRG.27461.1	u	0.102861	-0.110592	Chr15	.	6212956	6213194	1	239	MSTRG.27461	.
MSTRG.27463.1	u	0.00822767	-0.02048	Chr15	.	6213913	6214330	1	418	MSTRG.27463	.
MSTRG.27464.1	u	0.0116049	-0.0004096	Chr15	.	6367737	6368103	1	367	MSTRG.27464	.
MSTRG.27469.1	i	0.0242676	-0.098304	Chr15	+	5646276	5647153	2	850	MSTRG.27469	Potri.015G050800
MSTRG.27471.1	u	0.00407228	-0.253952	Chr15	+	6732897	6733590	1	694	MSTRG.27471	.
MSTRG.27472.1	u	0.0066364	-0.045056	Chr15	.	6734267	6734696	1	430	MSTRG.27472	.
MSTRG.27491.1	x	0.00743051	-0.0004096	Chr15	+	7418045	7418313	2	202	MSTRG.27491	Potri.015G054700
MSTRG.27506.1	i	0.00907289	-0.0004096	Chr15	+	7705304	7706210	2	885	MSTRG.27506	Potri.015G056400
MSTRG.27510.1	x	1.01983e-05	-0.0823296	Chr15	+	7807335	7818245	2	286	MSTRG.27510	Potri.015G056900
MSTRG.27511.1	u	0.0832039	-0.014336	Chr15	.	7810188	7810992	1	805	MSTRG.27511	.
MSTRG.27523.1	u	0.0346954	-0.036864	Chr15	.	8017050	8017352	1	303	MSTRG.27523	.
MSTRG.27530.1	x	0.0385728	-0.0606208	Chr15	-	8093780	8094046	2	214	MSTRG.27530	Potri.015G059100
MSTRG.2755.1	u	0.0818399	-0.073728	Chr01	.	33411208	33411416	1	209	MSTRG.2755	.
MSTRG.27551.1	x	0.0169074	-0.0864256	Chr15	+	8363613	8364071	3	384	MSTRG.27551	Potri.015G061000
MSTRG.27551.2	x	0.0322172	-0.13312	Chr15	+	8363613	8364072	2	298	MSTRG.27551	Potri.015G061000
MSTRG.27557.1	u	0.0827912	-0.196608	Chr15	+	8559802	8560647	1	846	MSTRG.27557	.
MSTRG.27559.1	i	0.0321333	-0.06144	Chr15	+	8542371	8543104	1	734	MSTRG.27559	Potri.015G062400
MSTRG.27564.1	x	0.0390915	-0.0004096	Chr15	+	8636710	8636997	2	211	MSTRG.27564	Potri.015G062900
MSTRG.27567.1	u	0.0132305	-0.0585728	Chr15	.	8701437	8701688	1	252	MSTRG.27567	.
MSTRG.2758.1	j	0.0329175	-0.0147456	Chr01	-	33389716	33392376	4	915	MSTRG.2758	Potri.001G330400
MSTRG.27591.1	u	0.0196735	-0.118784	Chr15	.	9073923	9074487	1	565	MSTRG.27591	.
MSTRG.2760.1	u	0.08814	-0.012288	Chr01	.	33449022	33449753	1	732	MSTRG.2760	.
MSTRG.27605.1	x	0.0819406	-0.0700416	Chr15	+	9221001	9222006	2	649	MSTRG.27605	Potri.015G067500
MSTRG.27625.1	x	0.088811	-0.11223	Chr15	-	9483988	9484264	2	203	MSTRG.27625	Potri.015G070300
MSTRG.27630.1	u	0.019557	-0.094208	Chr15	.	9546220	9546434	1	215	MSTRG.27630	.
MSTRG.27642.4	j	0.117265	-0.0376832	Chr15	+	9654124	9657252	3	2541	MSTRG.27642	Potri.015G072100
MSTRG.27648.1	x	0.010398	-0.094208	Chr15	-	9723751	9745126	2	352	MSTRG.27648	Potri.015G072800
MSTRG.2765.1	x	0.00431862	-0.136397	Chr01	+	33492008	33492772	2	269	MSTRG.2765	Potri.001G331400
MSTRG.2765.2	x	0.00724205	-0.125338	Chr01	+	33492009	33492752	2	254	MSTRG.2765	Potri.001G331400
MSTRG.27651.1	u	0.0474936	-0.0004096	Chr15	-	9766914	9767785	1	872	MSTRG.27651	.
MSTRG.27665.1	x	0.00364043	-0.172032	Chr15	-	9951443	9952099	2	437	MSTRG.27665	Potri.015G074600
MSTRG.27680.1	x	0.0321505	-0.0421888	Chr15	-	10216870	10217201	2	277	MSTRG.27680	Potri.015G077200
MSTRG.27680.2	x	0.125425	-0.008192	Chr15	-	10216870	10217201	2	299	MSTRG.27680	Potri.015G077200
MSTRG.27695.1	u	0.0152346	-0.144179	Chr15	.	10339157	10339402	1	246	MSTRG.27695	.
MSTRG.27722.1	x	0.0148045	-0.024576	Chr15	-	10570071	10588757	2	212	MSTRG.27722	Potri.015G081400
[truncated: 2,049 more rows]

## Sheet: Table S4
Supplementary Table 4 Significantly differentially expressed lncRNAs
			NO3- vs. NH4NO3					NH4+ vs. NH4NO3
LncRNA	gene_id	Nearest reference gene	fc	log2(fc)	P-value	q-value	regulation	fc	log2(fc)	P-value	q-value	regulation	significant
MSTRG.6920.1	MSTRG.6920	.	2.12839	1.08976	9.28669e-30	2.6286e-26	up						yes
MSTRG.11131.1	MSTRG.11131	Potri.005G128700	0.241894	-2.04755	6.61031e-22	7.34501e-19	down						yes
MSTRG.13820.1	MSTRG.13820	Potri.006G182300	5.71453	2.51463	2.4767e-17	1.59122e-14	up						yes
MSTRG.5060.3	MSTRG.5060	.	11538.7	13.4942	5.20237e-17	3.2963e-14	up	11189.8	13.4499	2.8784e-15	1.00393e-12	up	yes
MSTRG.26425.1	MSTRG.26425	Potri.014G126400	0.137986	-2.8574	4.18569e-13	1.47339e-10	down	0.133793	-2.90192	1.38863e-14	4.54018e-12	down	yes
MSTRG.26424.1	MSTRG.26424	Potri.014G126400	0.096251	-3.37705	6.81748e-12	1.61847e-09	down	0.114891	-3.12167	2.79397e-14	8.67208e-12	down	yes
MSTRG.23992.6	MSTRG.23992	Potri.013G001600	2.85931	1.51567	9.89882e-12	2.19143e-09	up						yes
MSTRG.24273.2	MSTRG.24273	Potri.013G035400	3.03201e-06	-18.3313	2.89422e-11	5.39868e-09	down	0.00020744	-12.235	0.00349591	0.0449988	down	yes
MSTRG.32317.2	MSTRG.32317	Potri.019G038300	89155.8	16.444	5.86121e-11	9.80862e-09	up	94093	16.5218	0.00143803	0.0221525	up	yes
MSTRG.31661.1	MSTRG.31661	Potri.018G110500	2.43844	1.28596	1.04141e-10	1.53086e-08	up						yes
MSTRG.25742.1	MSTRG.25742	Potri.014G049600	4.73877e-06	-17.6871	1.2045e-10	1.71303e-08	down	0.00445408	-7.81066	0.039533	0.265948	down	yes
MSTRG.23827.1	MSTRG.23827	Potri.012G123300	46.8756	5.55077	1.27511e-10	1.79128e-08	up	25.7934	4.68893	0.00459135	0.0559524	up	yes
MSTRG.7002.2	MSTRG.7002	.	1.39261e-05	-16.1318	2.24756e-10	2.86001e-08	down	1.39261e-05	-16.1318	1.01292e-10	1.24082e-08	down	yes
MSTRG.12611.1	MSTRG.12611	Potri.006G043700	1.40937e-05	-16.1146	5.76766e-10	5.92065e-08	down	0.00265925	-8.55476	0.0222917	0.18099	down	yes
MSTRG.30521.1	MSTRG.30521	Potri.017G131100	1.83896e-05	-15.7307	1.02198e-09	9.36128e-08	down						yes
MSTRG.30675.4	MSTRG.30675	.	4.15415e-05	-14.5551	1.21859e-09	1.06619e-07	down						yes
MSTRG.3748.1	MSTRG.3748	.	8505.57	13.0542	2.72267e-09	1.98369e-07	up	6422.04	12.6488	0.0126831	0.120551	up	yes
MSTRG.935.1	MSTRG.935	Potri.001G103700	9.03864e-05	-13.4335	3.10516e-09	2.19618e-07	down	9.03864e-05	-13.4335	4.43586e-09	2.47594e-07	down	yes
MSTRG.26423.1	MSTRG.26423	Potri.014G126400	0.082876	-3.5929	3.71787e-09	2.52832e-07	down	0.111889	-3.15986	9.47496e-07	2.95787e-05	down	yes
MSTRG.13381.1	MSTRG.13381	.	6.18889e-05	-13.98	4.16972e-09	2.75771e-07	down						yes
MSTRG.20178.1	MSTRG.20178	Potri.010G113600	0.00012238	-12.9963	4.7307e-09	3.00573e-07	down	0.00012238	-12.9963	4.18094e-09	2.35512e-07	down	yes
MSTRG.11523.1	MSTRG.11523	Potri.005G181000	0.0459923	-4.44247	4.88782e-09	3.08211e-07	down						yes
MSTRG.22800.2	MSTRG.22800	Potri.012G010000	6.54156e-05	-13.9	5.87557e-09	3.58441e-07	down	6.54156e-05	-13.9	5.1174e-09	2.77706e-07	down	yes
MSTRG.14244.7	MSTRG.14244	Potri.006G228900	0.000247014	-11.9831	7.27989e-09	4.24922e-07	down	0.000247014	-11.9831	6.28892e-09	3.30165e-07	down	yes
MSTRG.12407.2	MSTRG.12407	Potri.006G019300	3.75259e-05	-14.7018	7.36296e-09	4.27601e-07	down	3.75259e-05	-14.7018	6.671e-09	3.47247e-07	down	yes
MSTRG.3559.6	MSTRG.3559	Potri.001G439400	8.37869e-05	-13.5429	7.6563e-09	4.43158e-07	down						yes
MSTRG.1385.2	MSTRG.1385	Potri.001G157000	5.00106e-05	-14.2874	1.03132e-08	5.51202e-07	down	0.00382431	-8.03058	0.0386082	0.261647	down	yes
MSTRG.16733.1	MSTRG.16733	Potri.008G099300	29244.7	14.8359	1.03258e-08	5.51268e-07	up						yes
MSTRG.25747.1	MSTRG.25747	Potri.014G048600	18.218	4.1873	1.22731e-08	6.35255e-07	up						yes
MSTRG.13550.1	MSTRG.13550	Potri.006G148600	5.99329e-05	-14.0263	1.53677e-08	7.67036e-07	down	5.99329e-05	-14.0263	1.33303e-08	6.087e-07	down	yes
MSTRG.25262.1	MSTRG.25262	Potri.013G153400	6.10631e-05	-13.9993	2.10148e-08	9.97269e-07	down	6.10631e-05	-13.9993	1.81645e-08	7.87563e-07	down	yes
MSTRG.25073.3	MSTRG.25073	Potri.013G131200	9144.09	13.1586	2.17952e-08	1.02688e-06	up						yes
MSTRG.711.2	MSTRG.711	Potri.001G082300	2869.62	11.4866	2.21822e-08	1.04351e-06	up						yes
MSTRG.7231.1	MSTRG.7231	Potri.003G112600	3.98249e-05	-14.616	2.82743e-08	1.27397e-06	down						yes
MSTRG.12407.3	MSTRG.12407	Potri.006G019300	4.39403e-05	-14.4741	2.83977e-08	1.27767e-06	down						yes
MSTRG.19350.2	MSTRG.19350	Potri.010G016500	19443.8	14.247	2.85484e-08	1.2832e-06	up						yes
MSTRG.6909.6	MSTRG.6909	Potri.003G078100	0.000159354	-12.6155	3.03157e-08	1.34552e-06	down	0.000159354	-12.6155	2.66404e-08	1.09608e-06	down	yes
MSTRG.6732.1	MSTRG.6732	Potri.003G056400	8.39051e-05	-13.5409	3.04686e-08	1.34905e-06	down						yes
MSTRG.31279.1	MSTRG.31279	.	5675.89	12.4706	3.40304e-08	1.47583e-06	up						yes
MSTRG.4570.1	MSTRG.4570	Potri.002G070100	7.41454e-05	-13.7193	3.57898e-08	1.53529e-06	down	7.41454e-05	-13.7193	3.13351e-08	1.25935e-06	down	yes
MSTRG.28770.3	MSTRG.28770	Potri.016G058600	34908.7	15.0913	3.74377e-08	1.59516e-06	up	32912.8	15.0064	4.69423e-09	2.5856e-07	up	yes
MSTRG.15905.1	MSTRG.15905	Potri.008G000600	8.97191e-05	-13.4442	3.74855e-08	1.59516e-06	down	8.97191e-05	-13.4442	3.28547e-08	1.31068e-06	down	yes
MSTRG.25999.1	MSTRG.25999	.	12649.1	13.6268	4.29872e-08	1.7824e-06	up						yes
MSTRG.33725.4	MSTRG.33725	Potri.T014200	4044.62	11.9818	4.55053e-08	1.86558e-06	up						yes
MSTRG.11374.1	MSTRG.11374	Potri.005G162800	3.47417	1.79667	4.69969e-08	1.91817e-06	up	2.19155	1.13195	2.97086e-06	8.7147e-05	up	yes
MSTRG.27252.4	MSTRG.27252	Potri.015G025500	8449.94	13.0447	6.37832e-08	2.52587e-06	up						yes
MSTRG.9275.1	MSTRG.9275	Potri.004G143400	9260.01	13.1768	7.37283e-08	2.89104e-06	up						yes
MSTRG.14569.2	MSTRG.14569	Potri.006G267200	12735.9	13.6366	7.79589e-08	3.03877e-06	up						yes
MSTRG.16097.1	MSTRG.16097	Potri.008G023200	10798.6	13.3986	8.60553e-08	3.31777e-06	up						yes
MSTRG.26425.2	MSTRG.26425	Potri.014G126400	0.140505	-2.83131	9.42482e-08	3.6019e-06	down	0.172346	-2.53662	1.47923e-06	4.51956e-05	down	yes
MSTRG.19478.1	MSTRG.19478	.	0.000123024	-12.9888	1.29623e-07	4.82146e-06	down	0.137035	-2.86739	0.00443476	0.0544254	down	yes
MSTRG.12123.1	MSTRG.12123	Potri.005G248100	12443.8	13.6031	2.62103e-07	9.52174e-06	up						yes
MSTRG.13721.1	MSTRG.13721	Potri.006G170000	0.165598	-2.59424	4.40172e-07	1.57061e-05	down	0.421219	-1.24736	0.00955282	0.0975932	down	yes
MSTRG.6116.1	MSTRG.6116	Potri.002G249000	2.78012	1.47515	5.39205e-07	1.91714e-05	up						yes
MSTRG.6097.1	MSTRG.6097	Potri.002G246600	11380.9	13.4743	6.99546e-07	2.46908e-05	up						yes
MSTRG.25651.1	MSTRG.25651	Potri.014G037500	0.0161466	-5.95263	2.21135e-06	7.47758e-05	down	0.445683	-1.16591	0.00658982	0.0738832	down	yes
MSTRG.12309.1	MSTRG.12309	Potri.006G007400	0.317202	-1.65653	2.39785e-06	8.08736e-05	down						yes
MSTRG.8048.1	MSTRG.8048	Potri.003G206200	4.31965	2.11092	2.45132e-06	8.24653e-05	up						yes
MSTRG.8501.2	MSTRG.8501	Potri.004G040600	19.3794	4.27645	5.75117e-06	0.000186642	up	8.55812	3.09729	0.0252319	0.196211	up	yes
MSTRG.11252.1	MSTRG.11252	Potri.005G143400	3.96067	1.98574	7.423e-06	0.000237707	up						yes
MSTRG.13697.1	MSTRG.13697	Potri.006G166800	0.00170372	-9.19709	7.45435e-06	0.000238627	down	0.0310925	-5.00729	0.0024613	0.0339534	down	yes
MSTRG.27180.1	MSTRG.27180	Potri.015G017400	2.73965	1.45399	7.47938e-06	0.000239345	up						yes
MSTRG.17414.1	MSTRG.17414	.	4.31456	2.10921	8.18658e-06	0.000261158	up	3.95649	1.98422	0.00132537	0.0207228	up	yes
MSTRG.2234.1	MSTRG.2234	Potri.001G265700	0.433695	-1.20525	1.69792e-05	0.000519809	down	0.394367	-1.34239	3.489e-08	1.3787e-06	down	yes
MSTRG.17778.1	MSTRG.17778	Potri.008G226200	2.73026	1.44904	2.78835e-05	0.00082959	up						yes
MSTRG.8928.1	MSTRG.8928	Potri.004G094800	0.0441812	-4.50042	2.79326e-05	0.000830511	down						yes
MSTRG.28891.2	MSTRG.28891	Potri.016G076200	0.0860725	-3.5383	2.9576e-05	0.000874564	down						yes
MSTRG.34330.1	MSTRG.34330	.	0.43577	-1.19836	3.42195e-05	0.000999328	down						yes
MSTRG.25845.1	MSTRG.25845	Potri.014G061100	2.88427	1.52821	3.80599e-05	0.00110029	up	3.05749	1.61235	3.38969e-07	1.10473e-05	up	yes
MSTRG.4162.1	MSTRG.4162	.	0.282015	-1.82616	4.9136e-05	0.00139936	down						yes
MSTRG.4161.1	MSTRG.4161	.	0.191636	-2.38356	5.08822e-05	0.00144327	down						yes
MSTRG.16843.1	MSTRG.16843	.	2.08565	1.0605	5.19382e-05	0.00146733	up						yes
MSTRG.17268.1	MSTRG.17268	Potri.008G157900	0.214957	-2.21788	6.01098e-05	0.001674	down	0.430194	-1.21694	0.00134108	0.0208968	down	yes
MSTRG.27252.3	MSTRG.27252	Potri.015G025500	2.19637	1.13512	6.96682e-05	0.00191408	up	2.00858	1.00618	0.0317475	0.230265	up	yes
MSTRG.15420.1	MSTRG.15420	Potri.007G083900	5.24726	2.39157	7.37024e-05	0.00201228	up						yes
MSTRG.34478.1	MSTRG.34478	Potri.T073400	0.414162	-1.27173	7.38171e-05	0.00201438	down						yes
MSTRG.29941.1	MSTRG.29941	.	6126.06	12.5807	9.46908e-05	0.00250854	up						yes
MSTRG.4054.1	MSTRG.4054	Potri.002G013200	14.3838	3.84638	9.54818e-05	0.00252731	up						yes
MSTRG.28304.1	MSTRG.28304	.	0.49226	-1.02251	0.000129855	0.00331674	down						yes
MSTRG.21500.1	MSTRG.21500	.	2.18047	1.12464	0.000198137	0.0048056	up						yes
MSTRG.28274.1	MSTRG.28274	.	0.395276	-1.33907	0.000201171	0.00487276	down						yes
MSTRG.8766.1	MSTRG.8766	Potri.004G074400	2.0712	1.05047	0.000212053	0.00510138	up						yes
MSTRG.13901.1	MSTRG.13901	Potri.006G192000	4.27956	2.09746	0.000254084	0.00595351	up	2.77332	1.47161	0.00142527	0.0219854	up	yes
MSTRG.29975.1	MSTRG.29975	.	0.194611	-2.36133	0.000274851	0.00636757	down						yes
MSTRG.32726.1	MSTRG.32726	.	0.348935	-1.51897	0.000286865	0.00660338	down						yes
MSTRG.24437.1	MSTRG.24437	Potri.013G054100	0.326806	-1.61349	0.000304994	0.00694105	down						yes
MSTRG.4835.1	MSTRG.4835	.	0.235073	-2.08882	0.000351347	0.00785393	down						yes
MSTRG.21166.1	MSTRG.21166	Potri.010G224100	275.894	8.10797	0.000443954	0.00960392	up						yes
MSTRG.31160.1	MSTRG.31160	.	2.71323	1.44001	0.000507972	0.0106991	up	2.16078	1.11155	0.0247583	0.193884	up	yes
MSTRG.21715.5	MSTRG.21715	Potri.011G035700	27.2949	4.77056	0.000524875	0.0110021	up						yes
MSTRG.23021.1	MSTRG.23021	.	0.472842	-1.08057	0.000535219	0.0111807	down						yes
MSTRG.22960.1	MSTRG.22960	.	0.473706	-1.07794	0.000569922	0.0118054	down						yes
MSTRG.32871.2	MSTRG.32871	.	0.346527	-1.52896	0.000571677	0.0118293	down						yes
MSTRG.27491.1	MSTRG.27491	Potri.015G054700	4.72367	2.23991	0.00057701	0.0119206	up	4.13371	2.04744	0.00222291	0.0313424	up	yes
MSTRG.9724.1	MSTRG.9724	Potri.004G202500	2.21705	1.14864	0.000591427	0.0121777	up						yes
MSTRG.16405.1	MSTRG.16405	Potri.008G059800	0.478769	-1.0626	0.000620466	0.0126818	down						yes
MSTRG.22483.2	MSTRG.22483	Potri.011G134200	7992.34	12.9644	0.000653805	0.0132279	up						yes
MSTRG.33415.1	MSTRG.33415	.	2.81543	1.49335	0.000673764	0.013563	up	3.17534	1.66691	0.000381992	0.00737433	up	yes
MSTRG.17667.2	MSTRG.17667	.	3.54161e-05	-14.7852	0.000678184	0.013631	down						yes
MSTRG.3033.2	MSTRG.3033	Potri.001G360800	0.38895	-1.36234	0.000701213	0.0140203	down	0.494169	-1.01692	6.37802e-05	0.00153116	down	yes
MSTRG.5984.2	MSTRG.5984	Potri.002G234200	2.19126	1.13176	0.000877982	0.0168295	up	2.03879	1.02771	0.0182819	0.157735	up	yes
MSTRG.32717.1	MSTRG.32717	.	0.301396	-1.73027	0.000895076	0.0171143	down						yes
MSTRG.34476.1	MSTRG.34476	Potri.T073000	5.85373	2.54936	0.000897046	0.0171484	up						yes
MSTRG.24804.1	MSTRG.24804	Potri.013G097500	4.18286	2.06449	0.000915453	0.0174531	up	3.39889	1.76506	0.0111311	0.109481	up	yes
MSTRG.3603.1	MSTRG.3603	Potri.001G444300	0.0224936	-5.47434	0.000994778	0.0186862	down						yes
MSTRG.17667.3	MSTRG.17667	.	24.1828	4.59591	0.00102932	0.0192247	up	17.2771	4.11079	0.00399663	0.050084	up	yes
MSTRG.22269.1	MSTRG.22269	.	2.02113	1.01516	0.00104271	0.0194204	up						yes
MSTRG.31046.1	MSTRG.31046	Potri.018G036400	2.49919e-05	-15.2882	0.00104693	0.0194633	down	2.49919e-05	-15.2882	0.000798053	0.0136919	down	yes
MSTRG.30519.1	MSTRG.30519	Potri.017G131000	4.09075	2.03236	0.00109494	0.0202123	up						yes
MSTRG.16963.1	MSTRG.16963	.	5.08767	2.347	0.00112743	0.0206966	up	3.49933	1.80708	0.00470086	0.0570072	up	yes
MSTRG.18625.1	MSTRG.18625	Potri.009G107400	26.1983	4.7114	0.00112748	0.0206966	up	16.5245	4.04653	0.008426	0.0889025	up	yes
MSTRG.28061.3	MSTRG.28061	Potri.015G121300	0.286012	-1.80585	0.00126154	0.0226195	down						yes
MSTRG.30675.2	MSTRG.30675	.	6.24917e-05	-13.966	0.00126644	0.0226671	down						yes
MSTRG.5852.1	MSTRG.5852	Potri.002G218300	4.23811	2.08342	0.00138824	0.0244336	up	0.117755	-3.08614	0.00213822	0.030331	down	yes
MSTRG.67.1	MSTRG.67	Potri.001G006800	0.0894174	-3.4833	0.00140595	0.0246414	down	0.00792176	-6.97996	2.55333e-33	3.976e-30	down	yes
MSTRG.10348.1	MSTRG.10348	Potri.005G035400	0.490113	-1.02881	0.00157059	0.0269803	down						yes
MSTRG.33371.1	MSTRG.33371	.	2.65864	1.41069	0.00157632	0.0270495	up						yes
MSTRG.29061.2	MSTRG.29061	Potri.016G097300	5083.9	12.3117	0.00162013	0.0275953	up						yes
MSTRG.9819.2	MSTRG.9819	Potri.004G212900	30798.1	14.9106	0.00163277	0.0277487	up						yes
MSTRG.34084.1	MSTRG.34084	Potri.T027700	0.132778	-2.91292	0.00165435	0.0280361	down						yes
MSTRG.12063.1	MSTRG.12063	Potri.005G240900	0.312597	-1.67763	0.00167321	0.0282685	down	3.2505	1.70066	0.000707415	0.012427	up	yes
MSTRG.4443.1	MSTRG.4443	Potri.002G055800	0.016814	-5.89419	0.00179249	0.0298178	down						yes
MSTRG.9480.1	MSTRG.9480	Potri.004G170600	2.99369e-05	-15.0277	0.00186756	0.0307987	down	2.99369e-05	-15.0277	0.00145352	0.0223289	down	yes
MSTRG.28269.1	MSTRG.28269	Potri.015G146900	0.404955	-1.30417	0.00191247	0.0313929	down						yes
MSTRG.2755.1	MSTRG.2755	.	0.146376	-2.77224	0.00195239	0.0319113	down	0.173346	-2.52827	0.00367633	0.0468589	down	yes
MSTRG.24282.2	MSTRG.24282	Potri.013G035800	71.3028	6.15589	0.00199506	0.0323842	up						yes
MSTRG.20976.1	MSTRG.20976	.	4.82637	2.27094	0.00207571	0.0333733	up						yes
MSTRG.17448.1	MSTRG.17448	Potri.008G179700	2.41202	1.27024	0.00219418	0.0348045	up	2.12324	1.08627	0.0400449	0.268233	up	yes
MSTRG.2794.1	MSTRG.2794	.	0.257476	-1.95749	0.00231675	0.0362976	down						yes
MSTRG.4309.1	MSTRG.4309	Potri.002G041000	10.9352	3.45091	0.00243134	0.0376498	up						yes
MSTRG.29401.1	MSTRG.29401	Potri.016G137500	3.54601	1.82619	0.00255711	0.0391032	up						yes
MSTRG.33625.1	MSTRG.33625	.	0.379318	-1.39852	0.00259162	0.0394864	down						yes
MSTRG.30828.2	MSTRG.30828	Potri.018G013900	1210.73	10.2417	0.00265167	0.0401725	up						yes
MSTRG.6645.1	MSTRG.6645	.	0.117129	-3.09383	0.00274073	0.0412587	down						yes
MSTRG.16970.1	MSTRG.16970	Potri.008G126000	0.270626	-1.88563	0.00274946	0.0413562	down						yes
MSTRG.6603.1	MSTRG.6603	Potri.003G041100	0.154435	-2.69492	0.00286653	0.0427047	down						yes
MSTRG.18650.1	MSTRG.18650	.	3.49172	1.80394	0.00294522	0.0435662	up						yes
MSTRG.29402.1	MSTRG.29402	Potri.016G137500	7.88739	2.97955	0.00308256	0.0451614	up	0.208603	-2.26117	0.018642	0.159858	down	yes
MSTRG.4054.2	MSTRG.4054	Potri.002G013200	5.56664	2.47681	0.0030878	0.0452093	up						yes
MSTRG.16746.1	MSTRG.16746	Potri.008G100400	4.93862	2.30411	0.00310882	0.0454366	up						yes
MSTRG.12454.3	MSTRG.12454	Potri.006G025900	0.278461	-1.84445	0.00320074	0.0464264	down						yes
MSTRG.33944.1	MSTRG.33944	Potri.T141700	0.107308	-3.22017	0.00326665	0.0471739	down						yes
MSTRG.26953.1	MSTRG.26953	.	0.466322	-1.1006	0.00346344	0.0493842	down						yes
MSTRG.28830.1	MSTRG.28830	.	0.317516	-1.6551	0.0034972	0.0497448	down						yes
MSTRG.27591.1	MSTRG.27591	.	0.476113	-1.07062	0.00361436	0.0510714	down						yes
MSTRG.3021.1	MSTRG.3021	.	0.000207908	-12.2318	0.00362642	0.0512181	down						yes
MSTRG.29135.1	MSTRG.29135	Potri.016G107100	140.738	7.13686	0.00399281	0.0553016	up						yes
MSTRG.11296.1	MSTRG.11296	.	2.0949	1.06688	0.00401152	0.0554602	up						yes
MSTRG.27149.4	MSTRG.27149	Potri.015G011400	0.32569	-1.61843	0.00405839	0.0559833	down						yes
MSTRG.27222.1	MSTRG.27222	Potri.015G023000	3.71158	1.89203	0.00421818	0.0575585	up	3.64611	1.86636	0.01338	0.125283	up	yes
MSTRG.10783.1	MSTRG.10783	Potri.005G088300	0.473087	-1.07982	0.00424381	0.0578137	down						yes
MSTRG.13278.1	MSTRG.13278	Potri.006G119100	0.259674	-1.94523	0.00437441	0.059224	down						yes
MSTRG.20051.2	MSTRG.20051	Potri.010G097900	0.00765334	-7.02969	0.00438892	0.0593768	down						yes
MSTRG.27379.1	MSTRG.27379	.	2.53151	1.34	0.00448339	0.0603969	up						yes
MSTRG.3588.1	MSTRG.3588	Potri.001G447700	0.221692	-2.17337	0.00450159	0.0605888	down						yes
MSTRG.31609.1	MSTRG.31609	Potri.018G105500	0.254181	-1.97607	0.00458615	0.0614843	down	0.438919	-1.18797	1.82765e-05	0.000483066	down	yes
MSTRG.3587.2	MSTRG.3587	Potri.001G447700	0.271185	-1.88265	0.00465201	0.0622123	down	0.366111	-1.44965	0.0168547	0.148752	down	yes
MSTRG.32215.1	MSTRG.32215	Potri.019G025700	0.0392797	-4.67007	0.00469322	0.0626085	down						yes
MSTRG.2233.1	MSTRG.2233	Potri.001G265400	0.268323	-1.89796	0.00497087	0.0653914	down						yes
MSTRG.26713.1	MSTRG.26713	Potri.014G158200	0.00228158	-8.77575	0.0050702	0.0662522	down	2.38676e-05	-15.3546	0.00635806	0.071974	down	yes
MSTRG.15432.1	MSTRG.15432	.	2.06831	1.04845	0.00507685	0.0663109	up						yes
MSTRG.9813.1	MSTRG.9813	Potri.004G212100	11.4015	3.51115	0.00512135	0.0667782	up						yes
MSTRG.29306.1	MSTRG.29306	.	0.203459	-2.29719	0.00513994	0.066992	down						yes
MSTRG.13919.1	MSTRG.13919	Potri.006G194000	0.338567	-1.56249	0.00533434	0.0689875	down						yes
MSTRG.34068.1	MSTRG.34068	Potri.T026100	0.404492	-1.30582	0.00539964	0.0695774	down						yes
MSTRG.7499.1	MSTRG.7499	Potri.003G143800	1622.96	10.6644	0.00563638	0.0717325	up	1804.06	10.817	0.00459272	0.0559551	up	yes
MSTRG.3843.1	MSTRG.3843	Potri.001G462500	0.047127	-4.4073	0.0056682	0.0720477	down	0.0590997	-4.08071	0.00685415	0.0760713	down	yes
MSTRG.9813.2	MSTRG.9813	Potri.004G212100	0.109779	-3.18733	0.00568323	0.0721887	down						yes
MSTRG.34599.1	MSTRG.34599	.	0.346657	-1.52842	0.00595082	0.0746281	down	0.259846	-1.94427	0.000332909	0.00655501	down	yes
MSTRG.32305.1	MSTRG.32305	Potri.019G036900	0.428942	-1.22114	0.00634226	0.0782658	down						yes
MSTRG.22189.1	MSTRG.22189	.	0.359253	-1.47693	0.00634583	0.0782819	down						yes
MSTRG.6199.1	MSTRG.6199	Potri.002G258100	3.45917	1.79043	0.00644563	0.0791587	up						yes
MSTRG.25210.1	MSTRG.25210	Potri.013G147000	0.336742	-1.57028	0.00664165	0.0808789	down						yes
MSTRG.5553.1	MSTRG.5553	Potri.002G180800	0.477284	-1.06708	0.00665954	0.0810275	down						yes
MSTRG.6841.2	MSTRG.6841	Potri.003G070100	7.9399e-05	-13.6205	0.00677236	0.081966	down						yes
MSTRG.1920.1	MSTRG.1920	Potri.001G225800	2.57545	1.36482	0.00732599	0.0869147	up						yes
MSTRG.25619.1	MSTRG.25619	Potri.014G033300	5.49318	2.45764	0.00737181	0.0873118	up						yes
MSTRG.2571.1	MSTRG.2571	Potri.001G308300	3.21715	1.68578	0.00776419	0.0906731	up						yes
MSTRG.22198.1	MSTRG.22198	Potri.011G102900	3.93429	1.9761	0.00789831	0.0917191	up	0.423064	-1.24105	0.0349561	0.245369	down	yes
MSTRG.13001.1	MSTRG.13001	.	0.457495	-1.12817	0.0079278	0.0919877	down						yes
MSTRG.14618.1	MSTRG.14618	Potri.006G271300	4129.05	12.0116	0.00793235	0.0920173	up	1861.8	10.8625	0.0353023	0.24693	up	yes
MSTRG.34302.1	MSTRG.34302	Potri.T062200	24.5451	4.61737	0.00800226	0.0926295	up						yes
MSTRG.16100.1	MSTRG.16100	Potri.008G023500	5.10369	2.35154	0.00803109	0.0928209	up						yes
MSTRG.23309.1	MSTRG.23309	.	0.278437	-1.84458	0.00849826	0.0966658	down						yes
MSTRG.5838.1	MSTRG.5838	Potri.002G217200	0.339552	-1.55829	0.00851147	0.09678	down						yes
MSTRG.5857.1	MSTRG.5857	Potri.002G218800	2.9621	1.56662	0.00857124	0.0973392	up						yes
MSTRG.8068.1	MSTRG.8068	.	0.443063	-1.17442	0.00871047	0.0985671	down						yes
MSTRG.10087.1	MSTRG.10087	.	0.457116	-1.12937	0.00881601	0.0994796	down						yes
MSTRG.25853.1	MSTRG.25853	.	0.283496	-1.8186	0.00893372	0.10044	down						yes
MSTRG.33165.1	MSTRG.33165	Potri.T095100	0.358554	-1.47974	0.00910718	0.101901	down						yes
MSTRG.25330.1	MSTRG.25330	.	2.34171	1.22756	0.00912125	0.101972	up						yes
MSTRG.10687.1	MSTRG.10687	Potri.005G077900	0.410648	-1.28402	0.0094056	0.104259	down						yes
MSTRG.10140.1	MSTRG.10140	Potri.005G011800	2.76353	1.46651	0.00968708	0.106439	up	4.64043	2.21426	0.00380181	0.0480583	up	yes
MSTRG.10383.1	MSTRG.10383	Potri.005G044000	0.405235	-1.30317	0.00984343	0.107661	down						yes
MSTRG.24714.1	MSTRG.24714	.	0.139681	-2.83979	0.0100146	0.108915	down						yes
MSTRG.32721.1	MSTRG.32721	Potri.019G088800	2.63193	1.39612	0.0103427	0.111599	up						yes
MSTRG.6396.2	MSTRG.6396	Potri.003G017400	7.76196	2.95642	0.0103613	0.111716	up						yes
MSTRG.6743.1	MSTRG.6743	Potri.003G057000	2.20243	1.1391	0.010866	0.115477	up	0.491965	-1.02337	0.0180138	0.156125	down	yes
MSTRG.29955.1	MSTRG.29955	.	0.417202	-1.26118	0.0112062	0.117967	down						yes
MSTRG.33178.1	MSTRG.33178	Potri.T095700	16.4172	4.03714	0.0116506	0.121057	up						yes
MSTRG.8197.3	MSTRG.8197	Potri.004G002800	14.9865	3.90559	0.0116533	0.121058	up	63.8192	5.99592	1.77768e-05	0.000471077	up	yes
MSTRG.31828.1	MSTRG.31828	Potri.018G128900	3.22856	1.69089	0.0119375	0.123119	up	3.09601	1.63041	0.0385752	0.261477	up	yes
MSTRG.20206.1	MSTRG.20206	Potri.010G117100	0.000160778	-12.6026	0.0119901	0.123578	down						yes
MSTRG.11018.1	MSTRG.11018	Potri.005G114300	0.468011	-1.09538	0.0121099	0.124488	down						yes
MSTRG.7952.1	MSTRG.7952	Potri.003G197400	2.56001	1.35615	0.012216	0.125246	up						yes
MSTRG.24437.2	MSTRG.24437	Potri.013G054100	0.46482	-1.10525	0.0125224	0.12752	down						yes
MSTRG.11995.1	MSTRG.11995	Potri.005G234000	4.85279e-05	-14.3308	0.012651	0.128431	down						yes
MSTRG.19724.3	MSTRG.19724	Potri.010G060000	97.0743	6.60102	0.012698	0.128836	up	61.7291	5.94788	0.00842238	0.0888911	up	yes
MSTRG.9700.1	MSTRG.9700	Potri.004G198400	0.424409	-1.23647	0.01319	0.132367	down	0.457516	-1.1281	0.0239441	0.189545	down	yes
MSTRG.23054.1	MSTRG.23054	Potri.012G035900	0.21255	-2.23412	0.013204	0.132479	down						yes
MSTRG.27605.1	MSTRG.27605	Potri.015G067500	0.419987	-1.25158	0.0134391	0.134011	down						yes
MSTRG.3559.2	MSTRG.3559	Potri.001G439400	0.298818	-1.74266	0.0134405	0.134011	down						yes
MSTRG.2290.1	MSTRG.2290	Potri.001G272800	31.0331	4.95574	0.0134528	0.134039	up						yes
MSTRG.9799.1	MSTRG.9799	Potri.004G210200	2.21011	1.14412	0.0141646	0.138916	up						yes
MSTRG.16270.1	MSTRG.16270	.	0.321716	-1.63614	0.0143169	0.14002	down	0.336181	-1.57269	0.026277	0.201441	down	yes
MSTRG.22150.1	MSTRG.22150	.	0.463204	-1.11028	0.0147887	0.143186	down						yes
MSTRG.21163.1	MSTRG.21163	Potri.010G224100	7.05993	2.81965	0.0149943	0.144689	up						yes
MSTRG.29094.1	MSTRG.29094	Potri.016G102700	0.337216	-1.56825	0.0153301	0.146835	down						yes
MSTRG.33954.1	MSTRG.33954	Potri.T037600	0.415493	-1.2671	0.0154549	0.14763	down						yes
MSTRG.6202.1	MSTRG.6202	Potri.002G258100	3.28427	1.71557	0.0158278	0.150208	up						yes
MSTRG.34006.1	MSTRG.34006	Potri.T041300	0.0182505	-5.77592	0.015932	0.150817	down						yes
MSTRG.27252.7	MSTRG.27252	Potri.015G025700	4.20126	2.07082	0.0159356	0.150826	up						yes
MSTRG.11381.1	MSTRG.11381	Potri.005G163700	71.9699	6.16932	0.0165224	0.154548	up						yes
MSTRG.22132.1	MSTRG.22132	.	3.12826	1.64536	0.0179405	0.163001	up	4.08543	2.03049	0.00283531	0.0380112	up	yes
MSTRG.4200.1	MSTRG.4200	Potri.002G028300	2.14254	1.09932	0.0180231	0.163477	up						yes
MSTRG.29723.1	MSTRG.29723	.	0.372886	-1.42319	0.0189023	0.169015	down						yes
MSTRG.12035.1	MSTRG.12035	.	0.145327	-2.78262	0.0189232	0.169136	down						yes
MSTRG.7173.1	MSTRG.7173	.	0.364802	-1.45482	0.018993	0.169513	down						yes
MSTRG.7444.2	MSTRG.7444	Potri.003G137400	6599.08	12.688	0.0193048	0.171314	up						yes
MSTRG.3559.7	MSTRG.3559	Potri.001G439400	13.1802	3.7203	0.0193725	0.171691	up						yes
MSTRG.32431.1	MSTRG.32431	Potri.019G052800	0.243922	-2.03551	0.0196646	0.173428	down						yes
MSTRG.25068.1	MSTRG.25068	.	0.455953	-1.13304	0.0196657	0.173428	down						yes
MSTRG.27072.1	MSTRG.27072	.	0.335385	-1.57611	0.020998	0.181229	down						yes
MSTRG.2475.1	MSTRG.2475	.	2.57499	1.36457	0.0211431	0.181928	up						yes
MSTRG.31024.2	MSTRG.31024	Potri.018G032600	0.451347	-1.14769	0.0217571	0.185381	down						yes
MSTRG.17166.1	MSTRG.17166	Potri.008G146600	2.02068	1.01484	0.0222393	0.18802	up						yes
MSTRG.21609.1	MSTRG.21609	.	3.10867	1.6363	0.0222584	0.188147	up						yes
MSTRG.27993.1	MSTRG.27993	Potri.015G117600	0.463436	-1.10956	0.0224093	0.188901	down						yes
MSTRG.24229.1	MSTRG.24229	.	0.343131	-1.54317	0.0229559	0.192134	down						yes
MSTRG.29358.1	MSTRG.29358	Potri.016G131400	3.24607	1.69869	0.0231154	0.193064	up						yes
MSTRG.7594.1	MSTRG.7594	Potri.003G154100	5.51536	2.46345	0.0231974	0.193573	up	7.618	2.92941	0.0214317	0.175931	up	yes
MSTRG.3498.1	MSTRG.3498	.	0.488681	-1.03303	0.0234648	0.195144	down						yes
MSTRG.34475.1	MSTRG.34475	Potri.T073000	2.87994	1.52604	0.0237951	0.197021	up						yes
MSTRG.4825.1	MSTRG.4825	.	0.481442	-1.05457	0.0238291	0.197268	down						yes
MSTRG.30569.1	MSTRG.30569	Potri.017G134000	4.75404	2.24915	0.0239269	0.197917	up						yes
MSTRG.30412.1	MSTRG.30412	.	2.52473	1.33613	0.0241459	0.199083	up						yes
MSTRG.7791.2	MSTRG.7791	Potri.003G176800	0.370851	-1.43109	0.0243539	0.200222	down						yes
MSTRG.20011.1	MSTRG.20011	Potri.010G093700	0.467513	-1.09692	0.0246321	0.201615	down						yes
MSTRG.14225.1	MSTRG.14225	Potri.006G226400	0.382475	-1.38656	0.0248597	0.202856	down	0.458999	-1.12344	0.00166138	0.0248961	down	yes
MSTRG.22367.2	MSTRG.22367	Potri.011G120200	2.13279	1.09274	0.0250086	0.203711	up						yes
MSTRG.5258.1	MSTRG.5258	Potri.002G147900	6685.9	12.7069	0.0254701	0.206089	up						yes
MSTRG.9527.1	MSTRG.9527	Potri.004G177200	0.493918	-1.01766	0.0257372	0.207601	down						yes
MSTRG.27510.1	MSTRG.27510	Potri.015G056900	2.28227	1.19047	0.0259946	0.208816	up						yes
MSTRG.33380.1	MSTRG.33380	Potri.T178300	2.81418	1.49272	0.026015	0.208854	up						yes
MSTRG.13032.1	MSTRG.13032	Potri.006G092300	2.47055	1.30483	0.0262118	0.209955	up						yes
MSTRG.2693.1	MSTRG.2693	.	0.0646846	-3.95043	0.0263445	0.210522	down						yes
MSTRG.8501.1	MSTRG.8501	Potri.004G040600	12.1329	3.60085	0.0263723	0.210726	up	866.646	9.7593	3.72179e-06	0.000107798	up	yes
MSTRG.14244.3	MSTRG.14244	Potri.006G228900	2.765	1.46728	0.0264279	0.211023	up						yes
MSTRG.28770.1	MSTRG.28770	Potri.016G058600	0.477309	-1.067	0.0265788	0.211676	down						yes
MSTRG.11893.1	MSTRG.11893	Potri.005G222700	0.481803	-1.05348	0.0266788	0.212268	down	0.39804	-1.32902	0.0149208	0.135901	down	yes
MSTRG.13696.1	MSTRG.13696	Potri.006G166800	5.37549	2.4264	0.0273676	0.215672	up						yes
MSTRG.9520.1	MSTRG.9520	Potri.004G175900	0.358334	-1.48062	0.0280799	0.219465	down						yes
MSTRG.9562.1	MSTRG.9562	Potri.004G179400	0.349479	-1.51672	0.0281377	0.219786	down						yes
MSTRG.33582.1	MSTRG.33582	Potri.T002600	0.00950115	-6.71768	0.0285356	0.221632	down						yes
MSTRG.15142.1	MSTRG.15142	Potri.007G050600	7.35646	2.87901	0.0285648	0.221778	up						yes
MSTRG.13700.4	MSTRG.13700	Potri.006G167000	2.52666	1.33723	0.0285773	0.221808	up	3.32334	1.73263	0.000974954	0.0160958	up	yes
MSTRG.34518.2	MSTRG.34518	Potri.T164100	4.03046	2.01095	0.0287303	0.222765	up						yes
MSTRG.8905.1	MSTRG.8905	Potri.004G091400	0.441118	-1.18076	0.0293057	0.225685	down						yes
MSTRG.5666.1	MSTRG.5666	Potri.002G193900	0.272635	-1.87496	0.0294159	0.226231	down						yes
MSTRG.3042.1	MSTRG.3042	.	2.51107	1.3283	0.0294428	0.2264	up						yes
MSTRG.31218.1	MSTRG.31218	.	0.187258	-2.4169	0.0297006	0.227734	down						yes
MSTRG.1756.1	MSTRG.1756	Potri.001G203400	0.000285487	-11.7743	0.0302553	0.23064	down	0.000285487	-11.7743	0.0259352	0.199512	down	yes
MSTRG.451.1	MSTRG.451	.	0.307968	-1.69915	0.030626	0.232425	down						yes
MSTRG.28014.1	MSTRG.28014	Potri.015G115100	0.406378	-1.29911	0.0310475	0.234173	down						yes
MSTRG.22433.1	MSTRG.22433	.	0.501271	-0.996337	0.0322816	0.23996	down						no
MSTRG.22210.4	MSTRG.22210	Potri.011G101700	0.367893	-1.44264	0.0325001	0.240949	down						yes
MSTRG.23625.1	MSTRG.23625	.	3873.84	11.9195	0.0325105	0.240949	up	3888.9	11.9251	0.0244715	0.192317	up	yes
MSTRG.9842.1	MSTRG.9842	Potri.004G215900	2.32691	1.21841	0.0329501	0.242822	up	3.27689	1.71233	2.06811e-06	6.20732e-05	up	yes
MSTRG.12328.1	MSTRG.12328	Potri.006G010200	2.27019	1.18281	0.0330805	0.243451	up						yes
MSTRG.17203.1	MSTRG.17203	.	0.286974	-1.80101	0.0338768	0.247271	down						yes
MSTRG.25670.1	MSTRG.25670	Potri.014G039400	0.254134	-1.97634	0.0342331	0.248922	down	0.228498	-2.12975	0.00287492	0.038447	down	yes
MSTRG.20052.1	MSTRG.20052	.	0.245163	-2.02819	0.0342932	0.249162	down						yes
MSTRG.34104.1	MSTRG.34104	Potri.T146400	289.01	8.17498	0.0352739	0.253878	up						yes
MSTRG.33571.1	MSTRG.33571	Potri.T127200	3.0124	1.59092	0.0358885	0.256593	up						yes
MSTRG.34650.1	MSTRG.34650	Potri.T085900	8.49872	3.08725	0.0362509	0.258337	up						yes
MSTRG.21816.1	MSTRG.21816	Potri.011G048600	4.70413	2.23393	0.0363859	0.25882	up						yes
MSTRG.17806.1	MSTRG.17806	.	0.0708615	-3.81885	0.0369608	0.261512	down						yes
MSTRG.6608.1	MSTRG.6608	Potri.003G041600	0.33175	-1.59183	0.0371658	0.262395	down						yes
MSTRG.12454.2	MSTRG.12454	Potri.006G025900	4.25071	2.0877	0.0372646	0.262771	up						yes
MSTRG.20625.1	MSTRG.20625	Potri.010G165400	6401.24	12.6441	0.0381297	0.266029	up	26940.4	14.7175	0.0017754	0.0262747	up	yes
MSTRG.5980.1	MSTRG.5980	.	0.43759	-1.19235	0.0382268	0.266407	down	0.493899	-1.01771	0.0263797	0.202001	down	yes
MSTRG.25521.1	MSTRG.25521	Potri.014G021800	7.11658	2.83118	0.038278	0.266621	up	19.0613	4.25258	0.000868235	0.0146687	up	yes
MSTRG.33697.1	MSTRG.33697	Potri.T012600	2.74292	1.45572	0.0386495	0.268315	up						yes
MSTRG.27026.2	MSTRG.27026	Potri.014G197000	0.048762	-4.3581	0.0390114	0.269906	down						yes
MSTRG.17693.2	MSTRG.17693	Potri.008G212500	5.8803	2.55589	0.0390278	0.269962	up	5.28386	2.40159	0.0392242	0.264555	up	yes
MSTRG.1304.1	MSTRG.1304	.	0.322381	-1.63316	0.0403546	0.275674	down						yes
MSTRG.29905.1	MSTRG.29905	.	0.410403	-1.28489	0.0406377	0.276963	down						yes
MSTRG.33218.1	MSTRG.33218	Potri.T099100	2.15327	1.10653	0.040685	0.277107	up						yes
MSTRG.24662.1	MSTRG.24662	Potri.013G080400	2.33819	1.22539	0.0407281	0.277297	up	0.30904	-1.69413	0.0148319	0.135329	down	yes
MSTRG.14244.4	MSTRG.14244	Potri.006G228900	2.95949	1.56535	0.0414574	0.280403	up						yes
MSTRG.3464.2	MSTRG.3464	Potri.001G418500	51.7753	5.69419	0.0418502	0.281867	up						yes
MSTRG.5851.4	MSTRG.5851	Potri.002G218600	4.30509	2.10604	0.0419541	0.282315	up						yes
MSTRG.20673.1	MSTRG.20673	.	0.497632	-1.00685	0.0422953	0.283576	down	0.356333	-1.4887	7.05389e-06	0.000196683	down	yes
MSTRG.31898.1	MSTRG.31898	.	2.26682	1.18067	0.0424479	0.284308	up						yes
MSTRG.9659.1	MSTRG.9659	Potri.004G192800	2.47814	1.30926	0.0429675	0.286598	up						yes
MSTRG.8464.1	MSTRG.8464	Potri.004G034800	2.34775	1.23128	0.0429931	0.286685	up	2.65565	1.40906	0.00751399	0.081794	up	yes
MSTRG.30433.1	MSTRG.30433	Potri.017G121600	0.000301126	-11.6973	0.0430363	0.28682	down						yes
MSTRG.34299.1	MSTRG.34299	.	3.47327	1.79629	0.0430552	0.286891	up						yes
MSTRG.30667.1	MSTRG.30667	Potri.017G147500	0.383138	-1.38406	0.043341	0.288147	down						yes
MSTRG.6423.1	MSTRG.6423	.	4.70295	2.23357	0.0434774	0.28876	up						yes
MSTRG.24630.1	MSTRG.24630	Potri.013G076600	0.449808	-1.15262	0.0437164	0.289721	down						yes
MSTRG.2981.1	MSTRG.2981	Potri.001G355900	0.0125171	-6.31996	0.0439405	0.290577	down						yes
MSTRG.10341.1	MSTRG.10341	Potri.005G034700	0.327605	-1.60997	0.0440962	0.291136	down						yes
MSTRG.20587.1	MSTRG.20587	Potri.010G161200	5059.75	12.3048	0.0441357	0.291281	up						yes
MSTRG.27250.1	MSTRG.27250	Potri.015G025500	2.60972	1.3839	0.0452008	0.295428	up						yes
MSTRG.23292.1	MSTRG.23292	.	3.77674	1.91714	0.0460965	0.298939	up						yes
MSTRG.13334.1	MSTRG.13334	Potri.006G124600	0.000143138	-12.7703	0.0466506	0.301211	down						yes
MSTRG.5851.3	MSTRG.5851	Potri.002G218600	2.76349	1.46649	0.0477249	0.305637	up	0.0593764	-4.07397	6.42361e-05	0.00154117	down	yes
MSTRG.20585.1	MSTRG.20585	.	3.06988	1.61818	0.0478666	0.306175	up	10.0291	3.32612	0.000119089	0.00268231	up	yes
MSTRG.20645.1	MSTRG.20645	.	2.69371	1.42959	0.0479081	0.306357	up						yes
MSTRG.2856.5	MSTRG.2856	Potri.001G341300	0.193264	-2.37136	0.048324	0.307758	down						yes
MSTRG.5350.1	MSTRG.5350	Potri.002G157700	2.51924	1.33299	0.0485924	0.308921	up						yes
MSTRG.33717.2	MSTRG.33717	Potri.T013700	0.299543	-1.73916	0.0491761	0.311029	down						yes
MSTRG.29860.1	MSTRG.29860	Potri.017G048800	0.0946407	-3.4014	0.0493052	0.31146	down						yes
MSTRG.18661.1	MSTRG.18661	.						5.33309e-06	-17.5166	9.06095e-05	0.00210113	down	yes
MSTRG.9842.3	MSTRG.9842	Potri.004G215900						1.092e-05	-16.4827	0.00289682	0.0386947	down	yes
MSTRG.17795.3	MSTRG.17795	Potri.009G004000						1.32968e-05	-16.1986	1.21286e-11	2.12248e-09	down	yes
MSTRG.34422.4	MSTRG.34422	Potri.T160900						3.37201e-05	-14.856	1.84126e-09	1.24279e-07	down	yes
MSTRG.34174.2	MSTRG.34174	Potri.T053100						4.26182e-05	-14.5182	3.32971e-09	1.96983e-07	down	yes
MSTRG.32720.1	MSTRG.32720	Potri.019G088700						6.6102e-05	-13.8849	0.00828456	0.0878142	down	yes
MSTRG.25246.2	MSTRG.25246	Potri.013G151400						9.3301e-05	-13.3877	2.20493e-08	9.27969e-07	down	yes
MSTRG.766.1	MSTRG.766	Potri.001G088800						9.54944e-05	-13.3542	0.0108586	0.107561	down	yes
MSTRG.8400.1	MSTRG.8400	Potri.004G027800						0.000128447	-12.9265	0.0266769	0.203699	down	yes
MSTRG.8007.11	MSTRG.8007	Potri.003G199600						0.000133196	-12.8742	0.0262132	0.201195	down	yes
MSTRG.24876.1	MSTRG.24876	Potri.013G106400						0.000148823	-12.7141	0.00131938	0.0206503	down	yes
MSTRG.14422.3	MSTRG.14422	Potri.006G249000						0.000177072	-12.4634	7.3798e-09	3.74799e-07	down	yes
MSTRG.26777.1	MSTRG.26777	Potri.014G165600						0.000182926	-12.4165	0.0411279	0.27291	down	yes
MSTRG.12806.2	MSTRG.12806	.						0.000282113	-11.7914	0.00410541	0.0511986	down	yes
MSTRG.8860.2	MSTRG.8860	Potri.004G085800						0.000323673	-11.5932	0.000512674	0.00948477	down	yes
MSTRG.33125.2	MSTRG.33125	Potri.T092100						0.000687675	-10.506	0.0201891	0.168606	down	yes
MSTRG.30306.2	MSTRG.30306	Potri.017G102900						0.00194012	-9.00964	0.00185105	0.0271624	down	yes
MSTRG.34319.1	MSTRG.34319	.						0.00264175	-8.56429	0.00194991	0.0282787	down	yes
MSTRG.21112.1	MSTRG.21112	Potri.010G218900						0.00834564	-6.90476	1.76712e-05	0.000468821	down	yes
MSTRG.32720.2	MSTRG.32720	Potri.019G088700						0.0112141	-6.47854	1.67636e-07	5.63948e-06	down	yes
MSTRG.20734.1	MSTRG.20734	Potri.010G177900						0.0118142	-6.40333	2.34161e-05	0.000607033	down	yes
MSTRG.17558.1	MSTRG.17558	.						0.0142315	-6.13477	6.74461e-23	5.2513e-20	down	yes
MSTRG.30322.1	MSTRG.30322	Potri.017G105000						0.0144343	-6.11435	0.00330786	0.0430157	down	yes
MSTRG.15812.1	MSTRG.15812	Potri.007G137000						0.022114	-5.49889	7.3923e-05	0.00174726	down	yes
MSTRG.22009.1	MSTRG.22009	.						0.0350583	-4.8341	0.0253483	0.196677	down	yes
MSTRG.34633.2	MSTRG.34633	Potri.T085000						0.0476067	-4.39269	0.0392896	0.264931	down	yes
MSTRG.7693.1	MSTRG.7693	.						0.065169	-3.93967	2.18578e-05	0.000569853	down	yes
MSTRG.30572.1	MSTRG.30572	Potri.017G134200						0.0847646	-3.56039	0.0259298	0.199512	down	yes
MSTRG.2973.1	MSTRG.2973	Potri.001G355000						0.0955058	-3.38827	0.0137055	0.127538	down	yes
MSTRG.29133.1	MSTRG.29133	Potri.016G107100						0.0967773	-3.36919	0.0277152	0.209383	down	yes
MSTRG.815.2	MSTRG.815	Potri.001G094000						0.113016	-3.1454	0.00506876	0.0603691	down	yes
MSTRG.25115.1	MSTRG.25115	.						0.129137	-2.95303	0.00524398	0.0620298	down	yes
MSTRG.3572.1	MSTRG.3572	Potri.001G441400						0.130316	-2.93992	0.00808457	0.0861273	down	yes
MSTRG.29834.1	MSTRG.29834	Potri.017G045300						0.144882	-2.78705	0.0308448	0.225893	down	yes
MSTRG.2163.1	MSTRG.2163	Potri.001G255700						0.148461	-2.75184	0.0145409	0.133299	down	yes
MSTRG.29600.1	MSTRG.29600	Potri.017G015200						0.154425	-2.69502	0.0153034	0.138534	down	yes
MSTRG.30571.1	MSTRG.30571	Potri.017G134000						0.184834	-2.4357	0.000370946	0.00719753	down	yes
MSTRG.1898.1	MSTRG.1898	Potri.001G222900						0.208277	-2.26342	8.08282e-08	2.88719e-06	down	yes
MSTRG.30618.2	MSTRG.30618	Potri.017G141600						0.208732	-2.26028	0.0176191	0.153653	down	yes
MSTRG.12054.1	MSTRG.12054	.						0.21641	-2.20816	8.20714e-05	0.00192157	down	yes
MSTRG.21614.2	MSTRG.21614	Potri.011G013100						0.21653	-2.20736	0.0317284	0.230163	down	yes
MSTRG.32349.1	MSTRG.32349	.						0.21882	-2.19219	0.00328326	0.0427625	down	yes
MSTRG.5849.1	MSTRG.5849	Potri.002G218300						0.220772	-2.17937	0.00663063	0.0742091	down	yes
MSTRG.13136.1	MSTRG.13136	.						0.234796	-2.09052	0.0402892	0.269277	down	yes
MSTRG.31575.1	MSTRG.31575	Potri.018G102600						0.235834	-2.08416	0.0163476	0.145449	down	yes
MSTRG.33435.1	MSTRG.33435	.						0.238767	-2.06633	0.00751578	0.081794	down	yes
MSTRG.8550.1	MSTRG.8550	.						0.244827	-2.03016	0.0209093	0.172925	down	yes
MSTRG.15234.1	MSTRG.15234	.						0.247044	-2.01716	0.0276454	0.209045	down	yes
MSTRG.30618.1	MSTRG.30618	Potri.017G141600						0.254394	-1.97486	0.0215571	0.17666	down	yes
MSTRG.34302.2	MSTRG.34302	Potri.T062200						0.256352	-1.9638	0.0185999	0.159619	down	yes
MSTRG.10102.1	MSTRG.10102	Potri.005G007900						0.264445	-1.91896	0.0144074	0.132353	down	yes
MSTRG.3196.1	MSTRG.3196	Potri.001G383200						0.266662	-1.90692	1.32713e-10	1.55125e-08	down	yes
MSTRG.32906.1	MSTRG.32906	.						0.273103	-1.87249	0.0192403	0.163357	down	yes
MSTRG.17100.1	MSTRG.17100	.						0.274675	-1.8642	1.38166e-06	4.22735e-05	down	yes
MSTRG.5138.16	MSTRG.5138	Potri.002G132100						0.282249	-1.82496	0.00464252	0.0564035	down	yes
MSTRG.18735.2	MSTRG.18735	Potri.009G112800						0.285806	-1.80689	0.00959879	0.0979648	down	yes
MSTRG.10567.1	MSTRG.10567	.						0.292638	-1.77281	0.0249818	0.194991	down	yes
MSTRG.29089.1	MSTRG.29089	.						0.299458	-1.73957	0.00211723	0.0301112	down	yes
MSTRG.34422.1	MSTRG.34422	Potri.T160900						0.303127	-1.72201	0.0148507	0.13541	down	yes
MSTRG.11827.3	MSTRG.11827	Potri.005G216100						0.307788	-1.69999	9.65725e-10	7.48103e-08	down	yes
MSTRG.28697.1	MSTRG.28697	.						0.318143	-1.65225	5.63851e-05	0.00137227	down	yes
MSTRG.1898.2	MSTRG.1898	Potri.001G222900						0.329695	-1.6008	0.0423388	0.278263	down	yes
MSTRG.19828.2	MSTRG.19828	Potri.010G071800						0.338612	-1.56229	0.00618814	0.0704846	down	yes
MSTRG.34445.1	MSTRG.34445	.						0.339066	-1.56036	0.0351927	0.246426	down	yes
MSTRG.13662.1	MSTRG.13662	.						0.344859	-1.53592	0.00860833	0.0901393	down	yes
MSTRG.27314.1	MSTRG.27314	.						0.347662	-1.52424	0.0182257	0.157419	down	yes
MSTRG.321.1	MSTRG.321	Potri.001G038500						0.349088	-1.51834	5.56002e-19	2.96989e-16	down	yes
MSTRG.1746.1	MSTRG.1746	Potri.001G203100						0.349112	-1.51824	0.00362497	0.0463407	down	yes
MSTRG.10435.1	MSTRG.10435	.						0.359493	-1.47597	0.00677687	0.0753714	down	yes
MSTRG.8008.1	MSTRG.8008	Potri.003G199700						0.362898	-1.46236	0.00456754	0.0557381	down	yes
MSTRG.25115.4	MSTRG.25115	.						0.366631	-1.4476	0.026457	0.202492	down	yes
MSTRG.21460.1	MSTRG.21460	Potri.011G018700						0.367309	-1.44493	0.0191754	0.163077	down	yes
MSTRG.4134.2	MSTRG.4134	Potri.002G021600						0.369058	-1.43808	0.00125646	0.0198344	down	yes
MSTRG.3255.1	MSTRG.3255	Potri.001G395700						0.372433	-1.42495	0.0116108	0.112988	down	yes
MSTRG.8873.1	MSTRG.8873	Potri.004G086900						0.374083	-1.41857	0.000444205	0.00839902	down	yes
MSTRG.8016.1	MSTRG.8016	Potri.003G199700						0.375441	-1.41334	0.0156468	0.140892	down	yes
MSTRG.14808.1	MSTRG.14808	Potri.007G011900						0.377216	-1.40654	0.00663715	0.0742459	down	yes
MSTRG.19676.1	MSTRG.19676	Potri.010G053800						0.377577	-1.40516	0.0107986	0.107162	down	yes
MSTRG.18098.1	MSTRG.18098	.						0.382091	-1.38801	0.00945463	0.0968269	down	yes
MSTRG.27080.1	MSTRG.27080	Potri.015G003100						0.386301	-1.3722	0.00416668	0.0518159	down	yes
MSTRG.10494.1	MSTRG.10494	Potri.005G054900						0.38786	-1.36639	0.0254918	0.19739	down	yes
MSTRG.17308.1	MSTRG.17308	Potri.008G162300						0.389345	-1.36088	0.0250404	0.195218	down	yes
MSTRG.34607.1	MSTRG.34607	.						0.394797	-1.34082	0.00121027	0.01925	down	yes
MSTRG.20106.1	MSTRG.20106	Potri.010G105300						0.399481	-1.3238	0.00379335	0.0479975	down	yes
MSTRG.34595.1	MSTRG.34595	.						0.401828	-1.31535	0.0328447	0.235509	down	yes
MSTRG.19424.1	MSTRG.19424	Potri.010G019800						0.402783	-1.31193	0.0331817	0.237111	down	yes
MSTRG.23305.1	MSTRG.23305	.						0.406196	-1.29975	0.0162202	0.144639	down	yes
MSTRG.815.1	MSTRG.815	Potri.001G094000						0.416605	-1.26325	0.0104666	0.104591	down	yes
MSTRG.34067.1	MSTRG.34067	Potri.T025200						0.421993	-1.24471	0.00216036	0.0306109	down	yes
MSTRG.5138.7	MSTRG.5138	Potri.002G131900						0.422382	-1.24338	0.0298255	0.220396	down	yes
MSTRG.5509.3	MSTRG.5509	.						0.430048	-1.21743	0.00663685	0.0742459	down	yes
MSTRG.13361.1	MSTRG.13361	.						0.431382	-1.21296	4.28832e-06	0.00012289	down	yes
MSTRG.6525.1	MSTRG.6525	Potri.003G027800						0.431403	-1.21289	0.00330665	0.0430066	down	yes
MSTRG.34286.1	MSTRG.34286	.						0.432857	-1.20804	0.0222086	0.180518	down	yes
MSTRG.33752.1	MSTRG.33752	.						0.43301	-1.20753	0.0381136	0.259301	down	yes
MSTRG.11667.1	MSTRG.11667	.						0.433386	-1.20628	0.041651	0.275061	down	yes
MSTRG.6145.1	MSTRG.6145	.						0.436517	-1.19589	0.0158296	0.142066	down	yes
MSTRG.19240.1	MSTRG.19240	Potri.010G004500						0.441519	-1.17945	0.000378914	0.00733131	down	yes
MSTRG.34081.1	MSTRG.34081	Potri.T027100						0.4453	-1.16715	0.0255894	0.197862	down	yes
MSTRG.2168.1	MSTRG.2168	.						0.448846	-1.15571	0.0187841	0.160743	down	yes
MSTRG.17630.1	MSTRG.17630	Potri.008G202500						0.452176	-1.14504	0.000171569	0.00368978	down	yes
MSTRG.30215.1	MSTRG.30215	Potri.017G095600						0.453152	-1.14193	0.0288202	0.214956	down	yes
MSTRG.26242.1	MSTRG.26242	Potri.014G105600						0.456562	-1.13112	0.0124413	0.118965	down	yes
MSTRG.22905.1	MSTRG.22905	Potri.012G017100						0.457768	-1.12731	0.000937675	0.0155896	down	yes
MSTRG.28198.1	MSTRG.28198	.						0.458113	-1.12623	0.0173331	0.151692	down	yes
MSTRG.30311.2	MSTRG.30311	.						0.45874	-1.12425	0.0388232	0.262732	down	yes
MSTRG.33579.8	MSTRG.33579	Potri.T002500						0.459065	-1.12323	0.00943421	0.0966653	down	yes
MSTRG.28970.1	MSTRG.28970	Potri.016G086200						0.464448	-1.10641	0.0136424	0.127092	down	yes
MSTRG.5846.1	MSTRG.5846	.						0.466427	-1.10028	0.0172593	0.151291	down	yes
MSTRG.30976.1	MSTRG.30976	Potri.018G027200						0.470937	-1.08639	0.0298978	0.220806	down	yes
MSTRG.25721.1	MSTRG.25721	Potri.014G045300						0.474821	-1.07454	0.00943818	0.0966909	down	yes
MSTRG.27315.1	MSTRG.27315	.						0.477149	-1.06749	0.0111209	0.109415	down	yes
MSTRG.5138.9	MSTRG.5138	Potri.002G132100						0.48034	-1.05787	0.0128595	0.121824	down	yes
MSTRG.33630.1	MSTRG.33630	.						0.494558	-1.01579	0.00388677	0.0489541	down	yes
MSTRG.5956.1	MSTRG.5956	.						0.497726	-1.00658	8.2967e-07	2.60243e-05	down	yes
MSTRG.29759.1	MSTRG.29759	Potri.017G034900						0.499598	-1.00116	0.0410975	0.272837	down	yes
MSTRG.8619.1	MSTRG.8619	.						2.01373	1.00987	0.003386	0.0438581	up	yes
MSTRG.5558.1	MSTRG.5558	.						2.02342	1.0168	0.000791396	0.0136006	up	yes
MSTRG.4851.1	MSTRG.4851	Potri.002G099600						2.04445	1.03171	0.0146585	0.134177	up	yes
MSTRG.24294.1	MSTRG.24294	.						2.04533	1.03233	0.0280441	0.211001	up	yes
MSTRG.13480.1	MSTRG.13480	Potri.006G140500						2.05329	1.03794	0.00164109	0.0246522	up	yes
MSTRG.29610.1	MSTRG.29610	.						2.08198	1.05796	0.0141316	0.130476	up	yes
MSTRG.9718.1	MSTRG.9718	Potri.004G202000						2.09326	1.06575	0.00728497	0.0798686	up	yes
MSTRG.19323.1	MSTRG.19323	.						2.10019	1.07052	0.00699828	0.0774091	up	yes
MSTRG.27564.1	MSTRG.27564	Potri.015G062900						2.10756	1.07557	0.0242137	0.191068	up	yes
MSTRG.18648.1	MSTRG.18648	.						2.12404	1.08681	0.016349	0.145449	up	yes
MSTRG.19325.1	MSTRG.19325	.						2.14391	1.10025	0.00584685	0.0674332	up	yes
MSTRG.12899.1	MSTRG.12899	.						2.14552	1.10133	0.000425173	0.00809414	up	yes
MSTRG.2374.1	MSTRG.2374	.						2.20112	1.13824	0.0129559	0.12241	up	yes
MSTRG.6346.1	MSTRG.6346	.						2.20803	1.14276	5.1618e-07	1.65296e-05	up	yes
MSTRG.11155.1	MSTRG.11155	.						2.21033	1.14426	8.03921e-09	4.02943e-07	up	yes
MSTRG.33087.1	MSTRG.33087	.						2.22673	1.15493	0.0272503	0.206994	up	yes
MSTRG.2368.1	MSTRG.2368	Potri.001G282000						2.26126	1.17713	0.00186647	0.0273276	up	yes
MSTRG.13676.1	MSTRG.13676	Potri.006G165100						2.26665	1.18056	0.0184216	0.158494	up	yes
MSTRG.897.1	MSTRG.897	.						2.26742	1.18105	0.000911343	0.0152539	up	yes
MSTRG.28435.1	MSTRG.28435	Potri.016G017200						2.27203	1.18398	0.020952	0.173106	up	yes
MSTRG.22648.1	MSTRG.22648	.						2.27713	1.18721	0.00222973	0.0314193	up	yes
MSTRG.25343.1	MSTRG.25343	.						2.3103	1.20808	0.00188549	0.0275401	up	yes
MSTRG.24329.1	MSTRG.24329	.						2.3137	1.2102	0.0386748	0.261997	up	yes
MSTRG.33404.1	MSTRG.33404	.						2.3185	1.21319	9.69463e-06	0.000265717	up	yes
MSTRG.31464.1	MSTRG.31464	.						2.36441	1.24148	0.0101062	0.101932	up	yes
MSTRG.12737.1	MSTRG.12737	Potri.006G057900						2.3787	1.25017	0.0115677	0.112724	up	yes
MSTRG.26206.1	MSTRG.26206	Potri.014G101700						2.38925	1.25655	0.00863337	0.0903396	up	yes
MSTRG.4834.1	MSTRG.4834	Potri.002G097900						2.39953	1.26275	0.00495207	0.059309	up	yes
MSTRG.16854.1	MSTRG.16854	.						2.4172	1.27333	0.00023655	0.00488487	up	yes
MSTRG.7171.1	MSTRG.7171	Potri.003G106700						2.4319	1.28208	0.0412281	0.273269	up	yes
MSTRG.26477.1	MSTRG.26477	Potri.014G132200						2.43453	1.28365	0.0048201	0.0580319	up	yes
MSTRG.439.1	MSTRG.439	Potri.001G051500						2.47498	1.30742	0.0127049	0.120709	up	yes
MSTRG.396.1	MSTRG.396	.						2.51882	1.33275	0.000875807	0.0147694	up	yes
MSTRG.28766.1	MSTRG.28766	Potri.016G058600						2.52956	1.33888	0.00133394	0.0208249	up	yes
MSTRG.25621.1	MSTRG.25621	Potri.014G033300						2.53823	1.34382	0.00745988	0.0813785	up	yes
MSTRG.25832.1	MSTRG.25832	.						2.54431	1.34727	0.000217838	0.00454339	up	yes
MSTRG.23981.1	MSTRG.23981	Potri.013G000500						2.55182	1.35153	0.0127862	0.121293	up	yes
MSTRG.3753.1	MSTRG.3753	.						2.56762	1.36043	2.62929e-09	1.62998e-07	up	yes
MSTRG.14403.1	MSTRG.14403	Potri.006G247000						2.59429	1.37534	0.0325161	0.23391	up	yes
MSTRG.19873.1	MSTRG.19873	.						2.6597	1.41126	0.0193852	0.164221	up	yes
MSTRG.34016.1	MSTRG.34016	.						2.66784	1.41567	0.0076219	0.0826454	up	yes
MSTRG.11285.1	MSTRG.11285	.						2.68457	1.42469	0.0328791	0.235665	up	yes
MSTRG.31206.2	MSTRG.31206	Potri.018G059600						2.71273	1.43975	0.00664583	0.0742887	up	yes
MSTRG.32865.1	MSTRG.32865	.						2.72558	1.44656	0.0218737	0.178517	up	yes
MSTRG.8431.1	MSTRG.8431	.						2.73391	1.45096	6.20566e-08	2.276e-06	up	yes
MSTRG.8738.1	MSTRG.8738	Potri.004G069700						2.79983	1.48534	0.0121362	0.116705	up	yes
MSTRG.28614.1	MSTRG.28614	.						2.84671	1.5093	0.00943464	0.0966653	up	yes
MSTRG.2536.1	MSTRG.2536	Potri.001G303200						2.86018	1.5161	0.00365067	0.0465901	up	yes
MSTRG.30693.1	MSTRG.30693	.						2.89568	1.5339	0.00163671	0.0246066	up	yes
MSTRG.12057.1	MSTRG.12057	.						2.90488	1.53848	0.00673672	0.0750223	up	yes
MSTRG.441.1	MSTRG.441	Potri.001G051500						2.91294	1.54248	0.0431243	0.281933	up	yes
MSTRG.6719.1	MSTRG.6719	Potri.003G054700						2.93178	1.55177	4.0621e-05	0.00101441	up	yes
MSTRG.16704.1	MSTRG.16704	.						2.99914	1.58455	0.0225044	0.182004	up	yes
MSTRG.34065.1	MSTRG.34065	Potri.T026100						3.01808	1.59363	0.021051	0.173691	up	yes
MSTRG.12559.1	MSTRG.12559	Potri.006G038100						3.02509	1.59698	5.12698e-39	9.42071e-36	up	yes
MSTRG.2537.2	MSTRG.2537	Potri.001G303100						3.04012	1.60413	0.000260908	0.00530522	up	yes
MSTRG.6336.1	MSTRG.6336	.						3.0535	1.61047	0.0129379	0.122296	up	yes
MSTRG.7047.1	MSTRG.7047	.						3.05437	1.61088	0.0397086	0.26681	up	yes
MSTRG.878.1	MSTRG.878	.						3.07335	1.61981	0.000121734	0.00273652	up	yes
MSTRG.3579.1	MSTRG.3579	.						3.07629	1.62119	2.47284e-07	8.19885e-06	up	yes
MSTRG.1926.1	MSTRG.1926	Potri.001G226600						3.08742	1.6264	4.40091e-12	8.71399e-10	up	yes
MSTRG.23982.1	MSTRG.23982	.						3.38165	1.75773	0.00863034	0.0903215	up	yes
MSTRG.2538.1	MSTRG.2538	Potri.001G303200						3.45102	1.78702	0.0332341	0.237356	up	yes
MSTRG.7498.1	MSTRG.7498	.						3.51766	1.81462	0.00675741	0.0752065	up	yes
MSTRG.1639.1	MSTRG.1639	.						3.53109	1.82012	0.0252857	0.19641	up	yes
MSTRG.12897.1	MSTRG.12897	.						3.57689	1.83871	0.00193075	0.0280495	up	yes
MSTRG.8782.1	MSTRG.8782	Potri.004G077800						3.67607	1.87817	0.0284775	0.213247	up	yes
MSTRG.10006.1	MSTRG.10006	.						3.88548	1.95809	0.0143922	0.132227	up	yes
MSTRG.11077.1	MSTRG.11077	.						3.89407	1.96128	0.000732295	0.0127882	up	yes
MSTRG.529.1	MSTRG.529	Potri.001G062100						3.90868	1.96668	5.333e-07	1.7066e-05	up	yes
MSTRG.21715.2	MSTRG.21715	Potri.011G035700						3.95337	1.98308	0.00802502	0.0857115	up	yes
MSTRG.5573.1	MSTRG.5573	.						4.10032	2.03574	0.00107403	0.0174501	up	yes
MSTRG.25089.1	MSTRG.25089	.						4.64494	2.21566	0.0158533	0.142237	up	yes
MSTRG.24305.1	MSTRG.24305	Potri.013G038500						4.67733	2.22569	0.000383581	0.00739893	up	yes
MSTRG.12639.1	MSTRG.12639	Potri.006G048000						4.95347	2.30844	6.4549e-05	0.00154759	up	yes
MSTRG.11154.1	MSTRG.11154	.						5.18264	2.37369	0.00228237	0.0319845	up	yes
MSTRG.13987.1	MSTRG.13987	.						5.57737	2.47958	0.00222149	0.0313361	up	yes
MSTRG.14507.1	MSTRG.14507	.						5.58051	2.4804	3.22668e-06	9.426e-05	up	yes
MSTRG.9112.1	MSTRG.9112	.						5.87348	2.55421	0.00106808	0.0173679	up	yes
MSTRG.28586.1	MSTRG.28586	Potri.016G037100						5.99425	2.58358	0.0439809	0.285642	up	yes
MSTRG.438.1	MSTRG.438	Potri.001G051500						6.5154	2.70385	0.0135214	0.126323	up	yes
MSTRG.22206.1	MSTRG.22206	Potri.011G099000						6.57993	2.71807	7.15165e-06	0.000199348	up	yes
MSTRG.15636.2	MSTRG.15636	Potri.007G113400						7.23907	2.8558	0.00980467	0.099595	up	yes
MSTRG.7527.1	MSTRG.7527	Potri.003G146500						7.68601	2.94223	0.0346677	0.244114	up	yes
MSTRG.12307.1	MSTRG.12307	Potri.006G007200						8.39031	3.06872	0.0214178	0.17588	up	yes
MSTRG.34568.1	MSTRG.34568	.						9.4446	3.23949	0.000315124	0.00626389	up	yes
MSTRG.28458.1	MSTRG.28458	Potri.016G020500						9.5362	3.25341	0.0373473	0.255815	up	yes
MSTRG.14244.5	MSTRG.14244	Potri.006G228900						11.1574	3.47993	0.00463755	0.056366	up	yes
MSTRG.21661.1	MSTRG.21661	Potri.011G029300						11.8432	3.56598	0.00154451	0.0234235	up	yes
MSTRG.6004.1	MSTRG.6004	Potri.002G236400						14.7444	3.8821	0.0342746	0.242536	up	yes
MSTRG.3660.1	MSTRG.3660	Potri.001G429400						17.5199	4.13092	0.033187	0.237117	up	yes
MSTRG.6005.1	MSTRG.6005	Potri.002G236400						17.9278	4.16412	1.35097e-10	1.56716e-08	up	yes
MSTRG.29964.1	MSTRG.29964	.						29.6481	4.88987	5.35019e-05	0.00130695	up	yes
MSTRG.5755.1	MSTRG.5755	Potri.002G204400						32.8032	5.03577	0.00188548	0.0275401	up	yes
MSTRG.32777.1	MSTRG.32777	Potri.019G096900						37.02	5.21023	0.00803683	0.0857665	up	yes
MSTRG.14895.1	MSTRG.14895	Potri.007G020600						37.8215	5.24113	0.0329959	0.236151	up	yes
MSTRG.4076.1	MSTRG.4076	Potri.002G015400						38.6007	5.27055	0.000105325	0.00240592	up	yes
MSTRG.19654.1	MSTRG.19654	.						55.1519	5.78534	0.00101132	0.0166125	up	yes
MSTRG.21041.1	MSTRG.21041	Potri.010G210500						55.2034	5.78669	0.0287447	0.214532	up	yes
MSTRG.34065.3	MSTRG.34065	Potri.T026100						74.6974	6.22299	0.0180424	0.156277	up	yes
MSTRG.29860.2	MSTRG.29860	Potri.017G048800						91.5871	6.51707	5.30935e-10	4.61487e-08	up	yes
MSTRG.13389.1	MSTRG.13389	Potri.006G130900						123.768	6.9515	0.0054101	0.0635286	up	yes
MSTRG.11164.1	MSTRG.11164	.						190.518	7.57379	0.0040227	0.0503654	up	yes
MSTRG.30222.1	MSTRG.30222	Potri.017G096400						308.338	8.26837	0.0197364	0.166014	up	yes
MSTRG.22483.3	MSTRG.22483	Potri.011G134200						588.181	9.20012	2.75195e-05	0.000707224	up	yes
MSTRG.8235.2	MSTRG.8235	Potri.004G007800						3159.99	11.6257	9.82409e-08	3.43578e-06	up	yes
MSTRG.27184.1	MSTRG.27184	Potri.015G016600						3703.47	11.8547	0.0257342	0.198682	up	yes
MSTRG.8738.2	MSTRG.8738	Potri.004G070400						3902.67	11.9302	0.0191222	0.16276	up	yes
MSTRG.23002.1	MSTRG.23002	Potri.012G030300						4405.37	12.105	2.88968e-09	1.75935e-07	up	yes
MSTRG.15901.3	MSTRG.15901	Potri.008G000400						6618.8	12.6924	0.0213636	0.175513	up	yes
MSTRG.8277.4	MSTRG.8277	Potri.004G011600						7499.32	12.8725	0.0135982	0.126757	up	yes
MSTRG.29329.1	MSTRG.29329	Potri.016G129000						8673.09	13.0823	1.13804e-06	3.52161e-05	up	yes
MSTRG.4524.2	MSTRG.4524	Potri.002G065000						9290.86	13.1816	0.00757706	0.0822671	up	yes
MSTRG.34252.1	MSTRG.34252	Potri.T153300						9575.45	13.2251	0.00608491	0.069508	up	yes
MSTRG.11917.1	MSTRG.11917	Potri.005G225000						11017.3	13.4275	0.0100686	0.101675	up	yes
MSTRG.19603.1	MSTRG.19603	Potri.010G045800						11437.5	13.4815	6.24294e-08	2.28876e-06	up	yes
MSTRG.2788.2	MSTRG.2788	Potri.001G333900						11785.4	13.5247	1.97157e-08	8.42884e-07	up	yes
MSTRG.29682.1	MSTRG.29682	Potri.017G020700						11824.2	13.5295	0.00687697	0.0762693	up	yes
MSTRG.25874.2	MSTRG.25874	Potri.014G064000						12379.5	13.5957	0.00248013	0.0341276	up	yes
MSTRG.17504.1	MSTRG.17504	.						12824.4	13.6466	0.0100075	0.10118	up	yes
MSTRG.8501.3	MSTRG.8501	Potri.004G040600						13349.7	13.7045	4.34013e-06	0.000124142	up	yes
MSTRG.10531.1	MSTRG.10531	Potri.005G060100						14492.7	13.823	8.4732e-08	3.01381e-06	up	yes
MSTRG.24838.1	MSTRG.24838	Potri.013G102100						16692.8	14.0269	5.5912e-08	2.07299e-06	up	yes
MSTRG.18144.1	MSTRG.18144	Potri.009G045100						22099.6	14.4317	4.61063e-05	0.00113931	up	yes
MSTRG.21715.4	MSTRG.21715	Potri.011G035700						23089	14.4949	9.20808e-09	4.48656e-07	up	yes
MSTRG.7791.3	MSTRG.7791	Potri.003G176800						23660.1	14.5302	0.00254176	0.0347864	up	yes
MSTRG.23647.4	MSTRG.23647	Potri.012G104000						26866	14.7135	3.20205e-08	1.28409e-06	up	yes
MSTRG.5625.1	MSTRG.5625	Potri.002G189100						86705.5	16.4038	7.79817e-10	6.26814e-08	up	yes
MSTRG.14832.2	MSTRG.14832	Potri.007G014200						219189	17.7418	1.28117e-10	1.50906e-08	up	yes

## Sheet: Table S5
Supplementary Table 5 Significantly differentially expressed mRNAs
	NO3- vs. NH4NO3											NH4+ vs. NH4NO3
transcript_id	gene_name	GO	KEGG	KO_ENTRY	EC	Description	fc	log2(fc)	P-value	q-value	regulation	gene_name	GO	KEGG	KO_ENTRY	EC	Description	fc	log2(fc)	P-value	q-value	regulation	significant
Potri.001G001100.1	Potri.001G001100	Potri.001G001100.3	Potri.001G001100.4	Potri.001G001100.5	NA	expansin-A1 [Populus trichocarpa]	0.32545	-1.61949	0.00157599	0.0270489	down	Potri.001G001100	GO:0005576(extracellular region);GO:0005618(cell wall);GO:0006949(syncytium formation);GO:0009664(plant-type cell wall organization);GO:0009826(unidimensional cell growth);GO:0009828(plant-type cell wall loosening);GO:0009831(plant-type cell wall modification involved in multidimensional cell growth);GO:0016020(membrane)	NA	NA	NA	expansin-A1 [Populus trichocarpa]	0.441799	-1.17854	0.0078954	0.084731	down	yes
Potri.001G003100.3	Potri.001G003100	GO:0004497(monooxygenase activity);GO:0007275(multicellular organism development);GO:0010268(brassinosteroid homeostasis);GO:0016125(sterol metabolic process);GO:0016132(brassinosteroid biosynthetic process)	NA	NA	NA	beta-amyrin 28-oxidase [Populus trichocarpa]	3055.47	11.5772	2.77321e-08	1.25387e-06	up	Potri.001G003100	GO:0004497(monooxygenase activity);GO:0007275(multicellular organism development);GO:0010268(brassinosteroid homeostasis);GO:0016125(sterol metabolic process);GO:0016132(brassinosteroid biosynthetic process)	NA	NA	NA	beta-amyrin 28-oxidase [Populus trichocarpa]	10138.2	13.3075	0.000445597	0.00841668	up	yes
Potri.001G004800.1	Potri.001G004800	GO:0005737(cytoplasm);GO:0006607(NLS-bearing protein import into nucleus);GO:0006610(ribosomal protein import into nucleus);GO:0008139(nuclear localization sequence binding);GO:0031965(nuclear membrane);GO:0034399(nuclear periphery)	NA	NA	NA	importin-5 [Populus trichocarpa]	2.34042	1.22677	0.0472433	0.303654	up	Potri.001G004800	GO:0005737(cytoplasm);GO:0006607(NLS-bearing protein import into nucleus);GO:0006610(ribosomal protein import into nucleus);GO:0008139(nuclear localization sequence binding);GO:0031965(nuclear membrane);GO:0034399(nuclear periphery)	NA	NA	NA	importin-5 [Populus trichocarpa]	4.64921	2.21699	0.000853006	0.0144619	up	yes
Potri.001G005000.3	Potri.001G005000	GO:0004045(aminoacyl-tRNA hydrolase activity);GO:0005739(mitochondrion);GO:0032543(mitochondrial translation)	NA	NA	NA	PREDICTED: peptidyl-tRNA hydrolase, mitochondrial isoform X1 [Populus euphratica]	4.21365	2.07507	0.00095702	0.0180953	up	Potri.001G005000	GO:0004045(aminoacyl-tRNA hydrolase activity);GO:0005739(mitochondrion);GO:0032543(mitochondrial translation)	NA	NA	NA	PREDICTED: peptidyl-tRNA hydrolase, mitochondrial isoform X1 [Populus euphratica]	3.07189	1.61912	0.0138574	0.128561	up	yes
Potri.001G006900.1	Potri.001G006900	GO:0051213(dioxygenase activity)	00940(Phenylpropanoid biosynthesis)	K06892	EC:1.14.11.-	feruloyl CoA ortho-hydroxylase 1 [Populus trichocarpa]	0.0891294	-3.48796	0.000495969	0.0104909	down	Potri.001G006900	GO:0051213(dioxygenase activity)	00940(Phenylpropanoid biosynthesis)	K06892	EC:1.14.11.-	feruloyl CoA ortho-hydroxylase 1 [Populus trichocarpa]	0.0109376	-6.51456	8.18645e-37	1.36749e-33	down	yes
Potri.001G007200.1	Potri.001G007200	GO:0005887(integral component of plasma membrane);GO:0015179(L-amino acid transmembrane transporter activity);GO:0015203(polyamine transmembrane transporter activity);GO:0015297(antiporter activity)	03015(mRNA surveillance pathway)	K11584	NA	probable polyamine transporter At3g13620 [Populus trichocarpa]	2.57675	1.36555	6.12461e-07	2.17256e-05	up	Potri.001G007200	GO:0005887(integral component of plasma membrane);GO:0015179(L-amino acid transmembrane transporter activity);GO:0015203(polyamine transmembrane transporter activity);GO:0015297(antiporter activity)	03015(mRNA surveillance pathway)	K11584	NA	probable polyamine transporter At3g13620 [Populus trichocarpa]	2.27743	1.18741	1.30143e-05	0.000350947	up	yes
Potri.001G007900.3	Potri.001G007900	GO:0004004(ATP-dependent RNA helicase activity);GO:0010501(RNA secondary structure unwinding)	NA	NA	NA	PREDICTED: DEAD-box ATP-dependent RNA helicase 37-like [Populus euphratica]	0.00111492	-9.80884	3.57898e-08	1.53529e-06	down	Potri.001G007900	GO:0004004(ATP-dependent RNA helicase activity);GO:0010501(RNA secondary structure unwinding)	NA	NA	NA	PREDICTED: DEAD-box ATP-dependent RNA helicase 37-like [Populus euphratica]	0.00111492	-9.80884	3.13351e-08	1.25935e-06	down	yes
Potri.001G009800.2	Potri.001G009800	GO:0009507(chloroplast);GO:0009534(chloroplast thylakoid);GO:0009535(chloroplast thylakoid membrane);GO:0009543(chloroplast thylakoid lumen);GO:0009561(megagametogenesis);GO:0010027(thylakoid membrane organization);GO:0046872(metal ion binding);GO:0048564(photosystem I assembly)	03018(RNA degradation)	K12603	EC:3.1.13.4	PREDICTED: uncharacterized protein LOC105135002 [Populus euphratica]	0.43177	-1.21166	0.00355826	0.050457	down	Potri.001G009800	GO:0009507(chloroplast);GO:0009534(chloroplast thylakoid);GO:0009535(chloroplast thylakoid membrane);GO:0009543(chloroplast thylakoid lumen);GO:0009561(megagametogenesis);GO:0010027(thylakoid membrane organization);GO:0046872(metal ion binding);GO:0048564(photosystem I assembly)	03018(RNA degradation)	K12603	EC:3.1.13.4	PREDICTED: uncharacterized protein LOC105135002 [Populus euphratica]	0.335042	-1.57759	0.0402081	0.268934	down	yes
Potri.001G009800.8	Potri.001G009800	GO:0009507(chloroplast);GO:0009534(chloroplast thylakoid);GO:0009535(chloroplast thylakoid membrane);GO:0009543(chloroplast thylakoid lumen);GO:0009561(megagametogenesis);GO:0010027(thylakoid membrane organization);GO:0046872(metal ion binding);GO:0048564(photosystem I assembly)	03018(RNA degradation)	K12603	EC:3.1.13.4	PREDICTED: uncharacterized protein LOC105135002 [Populus euphratica]	0.000676646	-10.5293	0.0217069	0.185169	down	Potri.001G009800	GO:0009507(chloroplast);GO:0009534(chloroplast thylakoid);GO:0009535(chloroplast thylakoid membrane);GO:0009543(chloroplast thylakoid lumen);GO:0009561(megagametogenesis);GO:0010027(thylakoid membrane organization);GO:0046872(metal ion binding);GO:0048564(photosystem I assembly)	03018(RNA degradation)	K12603	EC:3.1.13.4	PREDICTED: uncharacterized protein LOC105135002 [Populus euphratica]	0.000676646	-10.5293	0.0181953	0.157231	down	yes
Potri.001G012200.2	Potri.001G012200	GO:0000148(1,3-beta-D-glucan synthase complex);GO:0003843(1,3-beta-D-glucan synthase activity);GO:0005886(plasma membrane)	NA	NA	NA	callose synthase 3 isoform X1 [Populus trichocarpa]	1120.49	10.1299	1.15458e-08	6.02248e-07	up	Potri.001G012200	GO:0000148(1,3-beta-D-glucan synthase complex);GO:0003843(1,3-beta-D-glucan synthase activity);GO:0005886(plasma membrane)	NA	NA	NA	callose synthase 3 isoform X1 [Populus trichocarpa]	685.987	9.42204	4.05138e-08	1.55935e-06	up	yes
Potri.001G013800.2	Potri.001G013800	GO:0003674(molecular_function);GO:0005634(nucleus)	NA	NA	NA	PREDICTED: uncharacterized protein LOC105134965 isoform X4 [Populus euphratica]	5922.96	12.5321	0.000634179	0.0129047	up	Potri.001G013800	GO:0003674(molecular_function);GO:0005634(nucleus)	NA	NA	NA	PREDICTED: uncharacterized protein LOC105134965 isoform X4 [Populus euphratica]	1809.22	10.8212	3.36047e-08	1.33423e-06	up	yes
Potri.001G014700.1	Potri.001G014700	GO:0004674(protein serine/threonine kinase activity);GO:0005886(plasma membrane);GO:0006468(protein phosphorylation)	NA	NA	NA	G-type lectin S-receptor-like serine/threonine-protein kinase LECRK3 [Populus trichocarpa]	0.392292	-1.35	0.0226756	0.190395	down	Potri.001G014700	GO:0004674(protein serine/threonine kinase activity);GO:0005886(plasma membrane);GO:0006468(protein phosphorylation)	NA	NA	NA	G-type lectin S-receptor-like serine/threonine-protein kinase LECRK3 [Populus trichocarpa]	2.7594	1.46435	0.0045085	0.0551563	up	yes
Potri.001G018500.2	Potri.001G018500	GO:0005758(mitochondrial intermembrane space);GO:1990050(phosphatidic acid transporter activity)	NA	NA	NA	PREDICTED: protein slowmo homolog [Populus euphratica]	2.02826	1.02024	0.0230899	0.192886	up	Potri.001G018500	GO:0005758(mitochondrial intermembrane space);GO:1990050(phosphatidic acid transporter activity)	NA	NA	NA	PREDICTED: protein slowmo homolog [Populus euphratica]	2.42396	1.27737	0.0226955	0.182954	up	yes
Potri.001G026100.3	Potri.001G026100	GO:0005085(guanyl-nucleotide exchange factor activity);GO:0005851(eukaryotic translation initiation factor 2B complex);GO:0006446(regulation of translational initiation);GO:0019509(L-methionine salvage from methylthioadenosine);GO:0046523(S-methyl-5-thioribose-1-phosphate isomerase activity)	03013(RNA transport)	K03754	NA	translation initiation factor eIF-2B subunit beta [Populus trichocarpa]	0.232986	-2.10168	0.00442505	0.0597776	down	Potri.001G026100	GO:0005085(guanyl-nucleotide exchange factor activity);GO:0005851(eukaryotic translation initiation factor 2B complex);GO:0006446(regulation of translational initiation);GO:0019509(L-methionine salvage from methylthioadenosine);GO:0046523(S-methyl-5-thioribose-1-phosphate isomerase activity)	03013(RNA transport)	K03754	NA	translation initiation factor eIF-2B subunit beta [Populus trichocarpa]	0.321489	-1.63716	0.0252413	0.196211	down	yes
Potri.001G026100.4	Potri.001G026100	GO:0005085(guanyl-nucleotide exchange factor activity);GO:0005851(eukaryotic translation initiation factor 2B complex);GO:0006446(regulation of translational initiation);GO:0019509(L-methionine salvage from methylthioadenosine);GO:0046523(S-methyl-5-thioribose-1-phosphate isomerase activity)	03013(RNA transport)	K03754	NA	translation initiation factor eIF-2B subunit beta [Populus trichocarpa]	0.000541208	-10.8515	1.0258e-07	3.8912e-06	down	Potri.001G026100	GO:0005085(guanyl-nucleotide exchange factor activity);GO:0005851(eukaryotic translation initiation factor 2B complex);GO:0006446(regulation of translational initiation);GO:0019509(L-methionine salvage from methylthioadenosine);GO:0046523(S-methyl-5-thioribose-1-phosphate isomerase activity)	03013(RNA transport)	K03754	NA	translation initiation factor eIF-2B subunit beta [Populus trichocarpa]	0.000541208	-10.8515	3.53807e-08	1.39092e-06	down	yes
Potri.001G030200.2	Potri.001G030200	GO:0005829(cytosol);GO:0006355(regulation of transcription, DNA-templated);GO:0008469(histone-arginine N-methyltransferase activity);GO:0035242(protein-arginine omega-N asymmetric methyltransferase activity)	NA	NA	NA	probable protein arginine N-methyltransferase 3 [Populus trichocarpa]	0.00345074	-8.17888	0.000388826	0.0085852	down	Potri.001G030200	GO:0005829(cytosol);GO:0006355(regulation of transcription, DNA-templated);GO:0008469(histone-arginine N-methyltransferase activity);GO:0035242(protein-arginine omega-N asymmetric methyltransferase activity)	NA	NA	NA	probable protein arginine N-methyltransferase 3 [Populus trichocarpa]	0.0727774	-3.78037	0.00383479	0.048382	down	yes
Potri.001G033500.2	Potri.001G033500	NA	NA	NA	NA	uncharacterized protein LOC7455793 [Populus trichocarpa]	0.0130315	-6.26186	0.0365583	0.259644	down	Potri.001G033500	NA	NA	NA	NA	uncharacterized protein LOC7455793 [Populus trichocarpa]	0.0256993	-5.28213	0.0332646	0.237537	down	yes
Potri.001G037900.4	Potri.001G037900	GO:0005737(cytoplasm)	NA	NA	NA	hypothetical protein POPTR_001G037900 [Populus trichocarpa]	377.606	8.56074	0.0080186	0.0927533	up	Potri.001G037900	GO:0005737(cytoplasm)	NA	NA	NA	hypothetical protein POPTR_001G037900 [Populus trichocarpa]	543.203	9.08535	6.07329e-05	0.0014672	up	yes
Potri.001G038100.1	Potri.001G038100	GO:0015194(L-serine transmembrane transporter activity);GO:0016021(integral component of membrane)	NA	NA	NA	probable serine incorporator [Populus trichocarpa]	3.96976	1.98905	0.00640582	0.0788217	up	Potri.001G038100	GO:0015194(L-serine transmembrane transporter activity);GO:0016021(integral component of membrane)	NA	NA	NA	probable serine incorporator [Populus trichocarpa]	4.92687	2.30067	0.00307556	0.0405692	up	yes
Potri.001G039200.1	Potri.001G039200	GO:0004674(protein serine/threonine kinase activity);GO:0005886(plasma membrane);GO:0007166(cell surface receptor signaling pathway)	NA	NA	NA	wall-associated receptor kinase-like 8 isoform X1 [Populus trichocarpa]	7.77069	2.95804	0.0280044	0.219099	up	Potri.001G039200	GO:0004674(protein serine/threonine kinase activity);GO:0005886(plasma membrane);GO:0007166(cell surface receptor signaling pathway)	NA	NA	NA	wall-associated receptor kinase-like 8 isoform X1 [Populus trichocarpa]	13.2434	3.7272	0.00496778	0.0594527	up	yes
Potri.001G042500.1	Potri.001G042500	GO:0004674(protein serine/threonine kinase activity);GO:0005524(ATP binding);GO:0005886(plasma membrane);GO:0006468(protein phosphorylation);GO:0007169(transmembrane receptor protein tyrosine kinase signaling pathway);GO:0016021(integral component of membrane)	NA	NA	NA	putative leucine-rich repeat receptor-like serine/threonine-protein kinase At2g24130 [Populus trichocarpa]	0.00037144	-11.3946	0.00199136	0.0323593	down	Potri.001G042500	GO:0004674(protein serine/threonine kinase activity);GO:0005524(ATP binding);GO:0005886(plasma membrane);GO:0006468(protein phosphorylation);GO:0007169(transmembrane receptor protein tyrosine kinase signaling pathway);GO:0016021(integral component of membrane)	NA	NA	NA	putative leucine-rich repeat receptor-like serine/threonine-protein kinase At2g24130 [Populus trichocarpa]	0.00037144	-11.3946	0.00155052	0.0234953	down	yes
Potri.001G044500.1	Potri.001G044500	GO:0002237(response to molecule of bacterial origin);GO:0003700(DNA binding transcription factor activity);GO:0005515(protein binding);GO:0005634(nucleus);GO:0006351(transcription, DNA-templated);GO:0006355(regulation of transcription, DNA-templated);GO:0009611(response to wounding);GO:0009751(response to salicylic acid);GO:0010200(response to chitin);GO:0031347(regulation of defense response);GO…	04626(Plant-pathogen interaction);04016(MAPK signaling pathway - plant)	K18834	NA	probable WRKY transcription factor 40 [Populus trichocarpa]	0.476294	-1.07007	0.0151661	0.145841	down	Potri.001G044500	GO:0002237(response to molecule of bacterial origin);GO:0003700(DNA binding transcription factor activity);GO:0005515(protein binding);GO:0005634(nucleus);GO:0006351(transcription, DNA-templated);GO:0006355(regulation of transcription, DNA-templated);GO:0009611(response to wounding);GO:0009751(response to salicylic acid);GO:0010200(response to chitin);GO:0031347(regulation of defense response);GO…	04626(Plant-pathogen interaction);04016(MAPK signaling pathway - plant)	K18834	NA	probable WRKY transcription factor 40 [Populus trichocarpa]	14.5533	3.86327	0.000763586	0.0132266	up	yes
Potri.001G046600.3	Potri.001G046600	GO:0003735(structural constituent of ribosome);GO:0022627(cytosolic small ribosomal subunit)	03010(Ribosome)	K02951	NA	PREDICTED: 40S ribosomal protein S12 [Populus euphratica]	3.24465	1.69806	0.0230445	0.192647	up	Potri.001G046600	GO:0003735(structural constituent of ribosome);GO:0022627(cytosolic small ribosomal subunit)	03010(Ribosome)	K02951	NA	PREDICTED: 40S ribosomal protein S12 [Populus euphratica]	4.71919	2.23854	1.33104e-07	4.52585e-06	up	yes
Potri.001G050700.1	Potri.001G050700	GO:0004672(protein kinase activity);GO:0005524(ATP binding);GO:0005886(plasma membrane);GO:0006468(protein phosphorylation);GO:0009507(chloroplast)	NA	NA	NA	PREDICTED: uncharacterized aarF domain-containing protein kinase At1g79600, chloroplastic isoform X1 [Populus euphratica]	18.366	4.19897	0.00988695	0.108009	up	Potri.001G050700	GO:0004672(protein kinase activity);GO:0005524(ATP binding);GO:0005886(plasma membrane);GO:0006468(protein phosphorylation);GO:0009507(chloroplast)	NA	NA	NA	PREDICTED: uncharacterized aarF domain-containing protein kinase At1g79600, chloroplastic isoform X1 [Populus euphratica]	22.485	4.49089	0.0062636	0.0711149	up	yes
Potri.001G050700.2	Potri.001G050700	GO:0004672(protein kinase activity);GO:0005524(ATP binding);GO:0005886(plasma membrane);GO:0006468(protein phosphorylation);GO:0009507(chloroplast)	NA	NA	NA	PREDICTED: uncharacterized aarF domain-containing protein kinase At1g79600, chloroplastic isoform X1 [Populus euphratica]	9119.38	13.1547	6.08639e-10	6.18563e-08	up	Potri.001G050700	GO:0004672(protein kinase activity);GO:0005524(ATP binding);GO:0005886(plasma membrane);GO:0006468(protein phosphorylation);GO:0009507(chloroplast)	NA	NA	NA	PREDICTED: uncharacterized aarF domain-containing protein kinase At1g79600, chloroplastic isoform X1 [Populus euphratica]	4265.76	12.0586	0.000620451	0.0111487	up	yes
Potri.001G051900.1	Potri.001G051900	GO:0003988(acetyl-CoA C-acyltransferase activity);GO:0005730(nucleolus);GO:0005739(mitochondrion);GO:0005774(vacuolar membrane);GO:0005777(peroxisome);GO:0005829(cytosol);GO:0006635(fatty acid beta-oxidation);GO:0009507(chloroplast);GO:0009514(glyoxysome);GO:0009611(response to wounding);GO:0009695(jasmonic acid biosynthetic process);GO:0009789(positive regulation of abscisic acid-activated signa…	00071(Fatty acid degradation);00592(alpha-Linolenic acid metabolism);01040(Biosynthesis of unsaturated fatty acids);00280(Valine, leucine and isoleucine degradation);04146(Peroxisome)	K07513	EC:2.3.1.16	3-ketoacyl-CoA thiolase 2, peroxisomal [Populus trichocarpa]	2.35341	1.23475	1.57109e-05	0.000483721	up	Potri.001G051900	GO:0003988(acetyl-CoA C-acyltransferase activity);GO:0005730(nucleolus);GO:0005739(mitochondrion);GO:0005774(vacuolar membrane);GO:0005777(peroxisome);GO:0005829(cytosol);GO:0006635(fatty acid beta-oxidation);GO:0009507(chloroplast);GO:0009514(glyoxysome);GO:0009611(response to wounding);GO:0009695(jasmonic acid biosynthetic process);GO:0009789(positive regulation of abscisic acid-activated signa…	00071(Fatty acid degradation);00592(alpha-Linolenic acid metabolism);01040(Biosynthesis of unsaturated fatty acids);00280(Valine, leucine and isoleucine degradation);04146(Peroxisome)	K07513	EC:2.3.1.16	3-ketoacyl-CoA thiolase 2, peroxisomal [Populus trichocarpa]	2.70938	1.43796	0.00099055	0.0163122	up	yes
Potri.001G055900.3	Potri.001G055900	GO:0003677(DNA binding);GO:0003700(DNA binding transcription factor activity);GO:0005634(nucleus);GO:0006351(transcription, DNA-templated);GO:0006355(regulation of transcription, DNA-templated);GO:0043565(sequence-specific DNA binding);GO:0044212(transcription regulatory region DNA binding);GO:0046872(metal ion binding);GO:0048510(regulation of timing of transition from vegetative to reproductive…	NA	NA	NA	squamosa promoter-binding-like protein 2 isoform X1 [Populus trichocarpa]	2.4314	1.28179	0.0181012	0.163958	up	Potri.001G055900	GO:0003677(DNA binding);GO:0003700(DNA binding transcription factor activity);GO:0005634(nucleus);GO:0006351(transcription, DNA-templated);GO:0006355(regulation of transcription, DNA-templated);GO:0043565(sequence-specific DNA binding);GO:0044212(transcription regulatory region DNA binding);GO:0046872(metal ion binding);GO:0048510(regulation of timing of transition from vegetative to reproductive…	NA	NA	NA	squamosa promoter-binding-like protein 2 isoform X1 [Populus trichocarpa]	3.47826	1.79837	0.018051	0.156325	up	yes
Potri.001G058100.2	Potri.001G058100	GO:0003674(molecular_function);GO:0005739(mitochondrion);GO:0008150(biological_process);GO:0016021(integral component of membrane)	NA	NA	NA	uncharacterized protein LOC7482794 [Populus trichocarpa]	0.000289116	-11.7561	1.19928e-08	6.23205e-07	down	Potri.001G058100	GO:0003674(molecular_function);GO:0005739(mitochondrion);GO:0008150(biological_process);GO:0016021(integral component of membrane)	NA	NA	NA	uncharacterized protein LOC7482794 [Populus trichocarpa]	0.000289116	-11.7561	1.03558e-08	4.93477e-07	down	yes
Potri.001G060000.2	Potri.001G060000	GO:0000987(proximal promoter sequence-specific DNA binding);GO:0003677(DNA binding);GO:0003700(DNA binding transcription factor activity);GO:0005515(protein binding);GO:0005634(nucleus);GO:0006351(transcription, DNA-templated);GO:0006355(regulation of transcription, DNA-templated);GO:0008361(regulation of cell size);GO:0009653(anatomical structure morphogenesis);GO:0043565(sequence-specific DNA b…	04712(Circadian rhythm - plant)	K16221	NA	transcription factor TCP20 [Populus trichocarpa]	0.000240674	-12.0206	2.69955e-10	3.29373e-08	down	Potri.001G060000	GO:0000987(proximal promoter sequence-specific DNA binding);GO:0003677(DNA binding);GO:0003700(DNA binding transcription factor activity);GO:0005515(protein binding);GO:0005634(nucleus);GO:0006351(transcription, DNA-templated);GO:0006355(regulation of transcription, DNA-templated);GO:0008361(regulation of cell size);GO:0009653(anatomical structure morphogenesis);GO:0043565(sequence-specific DNA b…	04712(Circadian rhythm - plant)	K16221	NA	transcription factor TCP20 [Populus trichocarpa]	0.0140971	-6.14846	1.98613e-08	8.47926e-07	down	yes
Potri.001G060100.1	Potri.001G060100	GO:0005829(cytosol);GO:0006521(regulation of cellular amino acid metabolic process);GO:0009506(plasmodesma);GO:0009507(chloroplast);GO:0009735(response to cytokinin)	00500(Starch and sucrose metabolism)	K00688	EC:2.4.1.1	ACT domain-containing protein ACR4 isoform X1 [Populus trichocarpa]	143.009	7.15996	0.00926432	0.103102	up	Potri.001G060100	GO:0005829(cytosol);GO:0006521(regulation of cellular amino acid metabolic process);GO:0009506(plasmodesma);GO:0009507(chloroplast);GO:0009735(response to cytokinin)	00500(Starch and sucrose metabolism)	K00688	EC:2.4.1.1	ACT domain-containing protein ACR4 isoform X1 [Populus trichocarpa]	125.991	6.97718	0.0106552	0.106061	up	yes
Potri.001G061400.3	Potri.001G061400	GO:0004674(protein serine/threonine kinase activity);GO:0004739(pyruvate dehydrogenase (acetyl-transferring) activity);GO:0005524(ATP binding);GO:0005730(nucleolus);GO:0005739(mitochondrion);GO:0005759(mitochondrial matrix);GO:0005774(vacuolar membrane);GO:0005794(Golgi apparatus);GO:0005829(cytosol);GO:0006086(acetyl-CoA biosynthetic process from pyruvate);GO:0006096(glycolytic process);GO:00064…	00010(Glycolysis / Gluconeogenesis);00020(Citrate cycle (TCA cycle));00620(Pyruvate metabolism)	K00162	EC:1.2.4.1	pyruvate dehydrogenase E1 component subunit beta-1, mitochondrial isoform X2 [Populus trichocarpa]	0.273283	-1.87153	0.00803498	0.0928319	down	Potri.001G061400	GO:0004674(protein serine/threonine kinase activity);GO:0004739(pyruvate dehydrogenase (acetyl-transferring) activity);GO:0005524(ATP binding);GO:0005730(nucleolus);GO:0005739(mitochondrion);GO:0005759(mitochondrial matrix);GO:0005774(vacuolar membrane);GO:0005794(Golgi apparatus);GO:0005829(cytosol);GO:0006086(acetyl-CoA biosynthetic process from pyruvate);GO:0006096(glycolytic process);GO:00064…	00010(Glycolysis / Gluconeogenesis);00020(Citrate cycle (TCA cycle));00620(Pyruvate metabolism)	K00162	EC:1.2.4.1	pyruvate dehydrogenase E1 component subunit beta-1, mitochondrial isoform X2 [Populus trichocarpa]	0.362944	-1.46218	0.000973365	0.0160724	down	yes
Potri.001G069800.1	Potri.001G069800	GO:0015079(potassium ion transmembrane transporter activity);GO:0016020(membrane)	NA	NA	NA	PREDICTED: potassium transporter 5-like [Populus euphratica]	2.56223	1.3574	0.00982053	0.107475	up	Potri.001G069800	GO:0015079(potassium ion transmembrane transporter activity);GO:0016020(membrane)	NA	NA	NA	PREDICTED: potassium transporter 5-like [Populus euphratica]	0.00321153	-8.28252	6.4151e-14	1.82471e-11	down	yes
Potri.001G073800.2	Potri.001G073800	GO:0003677(DNA binding);GO:0005634(nucleus);GO:0006351(transcription, DNA-templated);GO:0006355(regulation of transcription, DNA-templated);GO:0010030(positive regulation of seed germination);GO:0045893(positive regulation of transcription, DNA-templated)	NA	NA	NA	transcription factor GTE1 isoform X1 [Populus trichocarpa]	22.5474	4.49489	0.000621516	0.0127004	up	Potri.001G073800	GO:0003677(DNA binding);GO:0005634(nucleus);GO:0006351(transcription, DNA-templated);GO:0006355(regulation of transcription, DNA-templated);GO:0010030(positive regulation of seed germination);GO:0045893(positive regulation of transcription, DNA-templated)	NA	NA	NA	transcription factor GTE1 isoform X1 [Populus trichocarpa]	6.80318	2.76621	0.00652233	0.0733455	up	yes
Potri.001G073900.3	Potri.001G073900	GO:0005507(copper ion binding);GO:0005509(calcium ion binding);GO:0005515(protein binding);GO:0005516(calmodulin binding);GO:0005546(phosphatidylinositol-4,5-bisphosphate binding);GO:0005547(phosphatidylinositol-3,4,5-trisphosphate binding);GO:0005773(vacuole);GO:0005881(cytoplasmic microtubule);GO:0005886(plasma membrane);GO:0006499(N-terminal protein myristoylation);GO:0008017(microtubule bindi…	NA	NA	NA	plasma membrane-associated cation-binding protein 1 [Populus trichocarpa]	2828.79	11.466	7.34768e-08	2.88364e-06	up	Potri.001G073900	GO:0005507(copper ion binding);GO:0005509(calcium ion binding);GO:0005515(protein binding);GO:0005516(calmodulin binding);GO:0005546(phosphatidylinositol-4,5-bisphosphate binding);GO:0005547(phosphatidylinositol-3,4,5-trisphosphate binding);GO:0005773(vacuole);GO:0005881(cytoplasmic microtubule);GO:0005886(plasma membrane);GO:0006499(N-terminal protein myristoylation);GO:0008017(microtubule bindi…	NA	NA	NA	plasma membrane-associated cation-binding protein 1 [Populus trichocarpa]	2117.41	11.0481	1.31972e-07	4.49065e-06	up	yes
Potri.001G076200.2	Potri.001G076200	GO:0004605(phosphatidate cytidylyltransferase activity);GO:0009507(chloroplast);GO:0032049(cardiolipin biosynthetic process)	NA	NA	NA	hypothetical protein POPTR_001G076200 [Populus trichocarpa]	5333.65	12.3809	0.00133791	0.0236839	up	Potri.001G076200	GO:0004605(phosphatidate cytidylyltransferase activity);GO:0009507(chloroplast);GO:0032049(cardiolipin biosynthetic process)	NA	NA	NA	hypothetical protein POPTR_001G076200 [Populus trichocarpa]	2981.57	11.5419	2.88128e-08	1.17494e-06	up	yes
Potri.001G077900.2	Potri.001G077900	NA	NA	NA	NA	uncharacterized protein LOC7477791 isoform X1 [Populus trichocarpa]	2.57171	1.36273	0.0133796	0.133612	up	Potri.001G077900	NA	NA	NA	NA	uncharacterized protein LOC7477791 isoform X1 [Populus trichocarpa]	0.308279	-1.69769	0.00606743	0.0693763	down	yes
Potri.001G082800.2	Potri.001G082800	NA	NA	NA	NA	uncharacterized protein LOC7477816 isoform X1 [Populus trichocarpa]	2.69161	1.42847	0.0187842	0.168286	up	Potri.001G082800	NA	NA	NA	NA	uncharacterized protein LOC7477816 isoform X1 [Populus trichocarpa]	3.13872	1.65018	0.00899278	0.0931142	up	yes
Potri.001G086800.3	Potri.001G086800	GO:0005739(mitochondrion);GO:0006412(translation);GO:0008168(methyltransferase activity);GO:0032259(methylation)	00480(Glutathione metabolism)	K01469	EC:3.5.2.9	PREDICTED: methyltransferase-like protein 17, mitochondrial [Populus euphratica]	6895.24	12.7514	4.08362e-09	2.71279e-07	up	Potri.001G086800	GO:0005739(mitochondrion);GO:0006412(translation);GO:0008168(methyltransferase activity);GO:0032259(methylation)	00480(Glutathione metabolism)	K01469	EC:3.5.2.9	PREDICTED: methyltransferase-like protein 17, mitochondrial [Populus euphratica]	18322.8	14.1614	0.000129852	0.00289352	up	yes
Potri.001G087900.2	Potri.001G087900	GO:0003700(DNA binding transcription factor activity);GO:0005634(nucleus);GO:0009414(response to water deprivation);GO:0010118(stomatal movement);GO:0010167(response to nitrate);GO:0042128(nitrate assimilation)	NA	NA	NA	protein NLP7 isoform X2 [Populus trichocarpa]	0.000950212	-10.0395	2.24437e-08	1.05097e-06	down	Potri.001G087900	GO:0003700(DNA binding transcription factor activity);GO:0005634(nucleus);GO:0009414(response to water deprivation);GO:0010118(stomatal movement);GO:0010167(response to nitrate);GO:0042128(nitrate assimilation)	NA	NA	NA	protein NLP7 isoform X2 [Populus trichocarpa]	0.000950212	-10.0395	1.96597e-08	8.41664e-07	down	yes
Potri.001G089100.2	Potri.001G089100	GO:0009044(xylan 1,4-beta-xylosidase activity);GO:0009505(plant-type cell wall);GO:0031222(arabinan catabolic process);GO:0045493(xylan catabolic process);GO:0046556(alpha-L-arabinofuranosidase activity)	00520(Amino sugar and nucleotide sugar metabolism)	K15920	EC:3.2.1.37	probable beta-D-xylosidase 6 [Populus trichocarpa]	10219.4	13.319	1.42293e-09	1.20403e-07	up	Potri.001G089100	GO:0009044(xylan 1,4-beta-xylosidase activity);GO:0009505(plant-type cell wall);GO:0031222(arabinan catabolic process);GO:0045493(xylan catabolic process);GO:0046556(alpha-L-arabinofuranosidase activity)	00520(Amino sugar and nucleotide sugar metabolism)	K15920	EC:3.2.1.37	probable beta-D-xylosidase 6 [Populus trichocarpa]	5767.36	12.4937	2.84897e-09	1.74381e-07	up	yes
Potri.001G089900.3	Potri.001G089900	GO:0005634(nucleus);GO:0046872(metal ion binding)	NA	NA	NA	uncharacterized protein At4g10930 isoform X1 [Populus trichocarpa]	0.00532707	-7.55244	1.3276e-06	4.56823e-05	down	Potri.001G089900	GO:0005634(nucleus);GO:0046872(metal ion binding)	NA	NA	NA	uncharacterized protein At4g10930 isoform X1 [Populus trichocarpa]	0.00949226	-6.71903	2.47516e-05	0.000639849	down	yes
Potri.001G091100.2	Potri.001G091100	GO:0004550(nucleoside diphosphate kinase activity);GO:0005634(nucleus);GO:0009507(chloroplast)	00230(Purine metabolism);00240(Pyrimidine metabolism);04016(MAPK signaling pathway - plant)	K00940	EC:2.7.4.6	PREDICTED: uncharacterized protein LOC105127329 [Populus euphratica]	6.90769	2.7882	0.00516168	0.0672277	up	Potri.001G091100	GO:0004550(nucleoside diphosphate kinase activity);GO:0005634(nucleus);GO:0009507(chloroplast)	00230(Purine metabolism);00240(Pyrimidine metabolism);04016(MAPK signaling pathway - plant)	K00940	EC:2.7.4.6	PREDICTED: uncharacterized protein LOC105127329 [Populus euphratica]	4.66997	2.22341	0.0345819	0.243761	up	yes
Potri.001G091100.4	Potri.001G091100	GO:0004550(nucleoside diphosphate kinase activity);GO:0005634(nucleus);GO:0009507(chloroplast)	00230(Purine metabolism);00240(Pyrimidine metabolism);04016(MAPK signaling pathway - plant)	K00940	EC:2.7.4.6	PREDICTED: uncharacterized protein LOC105127329 [Populus euphratica]	7.19129	2.84625	0.00293475	0.0434462	up	Potri.001G091100	GO:0004550(nucleoside diphosphate kinase activity);GO:0005634(nucleus);GO:0009507(chloroplast)	00230(Purine metabolism);00240(Pyrimidine metabolism);04016(MAPK signaling pathway - plant)	K00940	EC:2.7.4.6	PREDICTED: uncharacterized protein LOC105127329 [Populus euphratica]	6.51533	2.70384	0.0104254	0.104316	up	yes
Potri.001G092800.3	Potri.001G092800	GO:0005634(nucleus)	NA	NA	NA	KAT8 regulatory NSL complex subunit 3 isoform X2 [Populus trichocarpa]	6985.79	12.7702	0.00177134	0.0295248	up	Potri.001G092800	GO:0005634(nucleus)	NA	NA	NA	KAT8 regulatory NSL complex subunit 3 isoform X2 [Populus trichocarpa]	3290.19	11.684	0.0066515	0.0743431	up	yes
Potri.001G094100.3	Potri.001G094100	GO:0003735(structural constituent of ribosome);GO:0006412(translation)	NA	NA	NA	mitochondrial adenine nucleotide transporter ADNT1 isoform X2 [Populus trichocarpa]	0.000559928	-10.8025	3.21686e-08	1.40736e-06	down	Potri.001G094100	GO:0003735(structural constituent of ribosome);GO:0006412(translation)	NA	NA	NA	mitochondrial adenine nucleotide transporter ADNT1 isoform X2 [Populus trichocarpa]	0.000559928	-10.8025	2.82333e-08	1.1549e-06	down	yes
Potri.001G099000.1	Potri.001G099000	GO:0003700(DNA binding transcription factor activity);GO:0005515(protein binding);GO:0005634(nucleus);GO:0006351(transcription, DNA-templated);GO:0006355(regulation of transcription, DNA-templated);GO:0007263(nitric oxide mediated signal transduction);GO:0009739(response to gibberellin);GO:0042742(defense response to bacterium);GO:0043565(sequence-specific DNA binding);GO:0044212(transcription re…	04016(MAPK signaling pathway - plant);04626(Plant-pathogen interaction)	K13426	NA	WRKY DNA-binding protein 27 [Populus tomentosa]	12.5347	3.64785	3.45925e-05	0.00100894	up	Potri.001G099000	GO:0003700(DNA binding transcription factor activity);GO:0005515(protein binding);GO:0005634(nucleus);GO:0006351(transcription, DNA-templated);GO:0006355(regulation of transcription, DNA-templated);GO:0007263(nitric oxide mediated signal transduction);GO:0009739(response to gibberellin);GO:0042742(defense response to bacterium);GO:0043565(sequence-specific DNA binding);GO:0044212(transcription re…	04016(MAPK signaling pathway - plant);04626(Plant-pathogen interaction)	K13426	NA	WRKY DNA-binding protein 27 [Populus tomentosa]	14.6027	3.86816	0.0141248	0.130435	up	yes
Potri.001G102000.3	Potri.001G102000	GO:0005737(cytoplasm);GO:0005886(plasma membrane);GO:0006508(proteolysis);GO:0008270(zinc ion binding);GO:0042277(peptide binding);GO:0043171(peptide catabolic process);GO:0070006(metalloaminopeptidase activity)	00480(Glutathione metabolism)	K01256	EC:3.4.11.2	puromycin-sensitive aminopeptidase [Populus trichocarpa]	3.29324	1.71951	0.00606343	0.0756425	up	Potri.001G102000	GO:0005737(cytoplasm);GO:0005886(plasma membrane);GO:0006508(proteolysis);GO:0008270(zinc ion binding);GO:0042277(peptide binding);GO:0043171(peptide catabolic process);GO:0070006(metalloaminopeptidase activity)	00480(Glutathione metabolism)	K01256	EC:3.4.11.2	puromycin-sensitive aminopeptidase [Populus trichocarpa]	0.249836	-2.00095	0.00315558	0.0414284	down	yes
Potri.001G104000.5	Potri.001G104000	GO:0003777(microtubule motor activity);GO:0005871(kinesin complex);GO:0007018(microtubule-based movement);GO:0016887(ATPase activity)	NA	NA	NA	kinesin-like protein KIN-14J isoform X3 [Populus trichocarpa]	0.0456119	-4.45445	0.00386064	0.0538555	down	Potri.001G104000	GO:0003777(microtubule motor activity);GO:0005871(kinesin complex);GO:0007018(microtubule-based movement);GO:0016887(ATPase activity)	NA	NA	NA	kinesin-like protein KIN-14J isoform X3 [Populus trichocarpa]	0.0559053	-4.16087	0.00405056	0.0506521	down	yes
Potri.001G105300.1	Potri.001G105300	GO:0005509(calcium ion binding);GO:0005544(calcium-dependent phospholipid binding);GO:0005886(plasma membrane)	NA	NA	NA	xyloglucan-specific galacturonosyltransferase 1 [Populus trichocarpa]	0.248218	-2.01032	8.6854e-07	3.04204e-05	down	Potri.001G105300	GO:0005509(calcium ion binding);GO:0005544(calcium-dependent phospholipid binding);GO:0005886(plasma membrane)	NA	NA	NA	xyloglucan-specific galacturonosyltransferase 1 [Populus trichocarpa]	0.438994	-1.18773	0.00135718	0.0210945	down	yes
Potri.001G106300.1	Potri.001G106300	GO:0006952(defense response)	03013(RNA transport)	K03239	NA	protein LURP-one-related 4 [Populus trichocarpa]	0.326076	-1.61672	0.00465987	0.0622812	down	Potri.001G106300	GO:0006952(defense response)	03013(RNA transport)	K03239	NA	protein LURP-one-related 4 [Populus trichocarpa]	0.3255	-1.61927	0.00444674	0.0545374	down	yes
Potri.001G108100.2	Potri.001G108100	GO:0005634(nucleus)	NA	NA	NA	heat stress transcription factor B-2b [Populus trichocarpa]	2.24704	1.16802	0.0042248	0.057623	up	Potri.001G108100	GO:0005634(nucleus)	NA	NA	NA	heat stress transcription factor B-2b [Populus trichocarpa]	3.08619	1.62583	5.41713e-05	0.00132154	up	yes
Potri.001G111300.1	Potri.001G111300	GO:0001056(RNA polymerase III activity);GO:0005666(DNA-directed RNA polymerase III complex)	NA	NA	NA	DNA-directed RNA polymerase IV subunit 1 isoform X1 [Populus trichocarpa]	5.66515	2.50211	0.0278613	0.218286	up	Potri.001G111300	GO:0001056(RNA polymerase III activity);GO:0005666(DNA-directed RNA polymerase III complex)	NA	NA	NA	DNA-directed RNA polymerase IV subunit 1 isoform X1 [Populus trichocarpa]	6.80858	2.76735	0.0253009	0.196492	up	yes
Potri.001G112900.1	Potri.001G112900	GO:0005576(extracellular region);GO:0005618(cell wall);GO:0009664(plant-type cell wall organization);GO:0009826(unidimensional cell growth);GO:0009828(plant-type cell wall loosening);GO:0009831(plant-type cell wall modification involved in multidimensional cell growth);GO:0016020(membrane);GO:0048767(root hair elongation)	NA	NA	NA	LOW QUALITY PROTEIN: expansin-A7 [Populus trichocarpa]	0.000186021	-12.3922	2.75984e-09	2.00599e-07	down	Potri.001G112900	GO:0005576(extracellular region);GO:0005618(cell wall);GO:0009664(plant-type cell wall organization);GO:0009826(unidimensional cell growth);GO:0009828(plant-type cell wall loosening);GO:0009831(plant-type cell wall modification involved in multidimensional cell growth);GO:0016020(membrane);GO:0048767(root hair elongation)	NA	NA	NA	LOW QUALITY PROTEIN: expansin-A7 [Populus trichocarpa]	0.000186021	-12.3922	1.7306e-09	1.19727e-07	down	yes
Potri.001G118200.1	Potri.001G118200	GO:0005507(copper ion binding);GO:0005576(extracellular region);GO:0006809(nitric oxide biosynthetic process);GO:0008131(primary amine oxidase activity);GO:0009308(amine metabolic process);GO:0009738(abscisic acid-activated signaling pathway);GO:0048038(quinone binding);GO:0052593(tryptamine:oxygen oxidoreductase (deaminating) activity);GO:0052594(aminoacetone:oxygen oxidoreductase(deaminating) a…	00260(Glycine, serine and threonine metabolism);00350(Tyrosine metabolism);00360(Phenylalanine metabolism);00410(beta-Alanine metabolism);00950(Isoquinoline alkaloid biosynthesis);00960(Tropane, piperidine and pyridine alkaloid biosynthesis)	K00276	EC:1.4.3.21	primary amine oxidase isoform X1 [Populus trichocarpa]	2.68847	1.42679	0.00310994	0.0454393	up	Potri.001G118200	GO:0005507(copper ion binding);GO:0005576(extracellular region);GO:0006809(nitric oxide biosynthetic process);GO:0008131(primary amine oxidase activity);GO:0009308(amine metabolic process);GO:0009738(abscisic acid-activated signaling pathway);GO:0048038(quinone binding);GO:0052593(tryptamine:oxygen oxidoreductase (deaminating) activity);GO:0052594(aminoacetone:oxygen oxidoreductase(deaminating) a…	00260(Glycine, serine and threonine metabolism);00350(Tyrosine metabolism);00360(Phenylalanine metabolism);00410(beta-Alanine metabolism);00950(Isoquinoline alkaloid biosynthesis);00960(Tropane, piperidine and pyridine alkaloid biosynthesis)	K00276	EC:1.4.3.21	primary amine oxidase isoform X1 [Populus trichocarpa]	2.40574	1.26648	0.0281151	0.21131	up	yes
Potri.001G118200.5	Potri.001G118200	GO:0005507(copper ion binding);GO:0005576(extracellular region);GO:0006809(nitric oxide biosynthetic process);GO:0008131(primary amine oxidase activity);GO:0009308(amine metabolic process);GO:0009738(abscisic acid-activated signaling pathway);GO:0048038(quinone binding);GO:0052593(tryptamine:oxygen oxidoreductase (deaminating) activity);GO:0052594(aminoacetone:oxygen oxidoreductase(deaminating) a…	00260(Glycine, serine and threonine metabolism);00350(Tyrosine metabolism);00360(Phenylalanine metabolism);00410(beta-Alanine metabolism);00950(Isoquinoline alkaloid biosynthesis);00960(Tropane, piperidine and pyridine alkaloid biosynthesis)	K00276	EC:1.4.3.21	primary amine oxidase isoform X1 [Populus trichocarpa]	2.34784	1.23133	0.023504	0.195374	up	Potri.001G118200	GO:0005507(copper ion binding);GO:0005576(extracellular region);GO:0006809(nitric oxide biosynthetic process);GO:0008131(primary amine oxidase activity);GO:0009308(amine metabolic process);GO:0009738(abscisic acid-activated signaling pathway);GO:0048038(quinone binding);GO:0052593(tryptamine:oxygen oxidoreductase (deaminating) activity);GO:0052594(aminoacetone:oxygen oxidoreductase(deaminating) a…	00260(Glycine, serine and threonine metabolism);00350(Tyrosine metabolism);00360(Phenylalanine metabolism);00410(beta-Alanine metabolism);00950(Isoquinoline alkaloid biosynthesis);00960(Tropane, piperidine and pyridine alkaloid biosynthesis)	K00276	EC:1.4.3.21	primary amine oxidase isoform X1 [Populus trichocarpa]	2.68908	1.42711	0.0177939	0.154752	up	yes
Potri.001G119100.1	Potri.001G119100	GO:0008150(biological_process);GO:0009507(chloroplast);GO:0009570(chloroplast stroma);GO:0016740(transferase activity)	NA	NA	NA	uncharacterized protein LOC18094390 [Populus trichocarpa]	0.00045244	-11.11	0.00756306	0.0889306	down	Potri.001G119100	GO:0008150(biological_process);GO:0009507(chloroplast);GO:0009570(chloroplast stroma);GO:0016740(transferase activity)	NA	NA	NA	uncharacterized protein LOC18094390 [Populus trichocarpa]	0.00045244	-11.11	0.00611776	0.0698302	down	yes
Potri.001G120700.1	Potri.001G120700	GO:0001228(transcriptional activator activity, RNA polymerase II transcription regulatory region sequence-specific DNA binding);GO:0005634(nucleus);GO:0005737(cytoplasm);GO:0006351(transcription, DNA-templated);GO:0010584(pollen exine formation);GO:0043565(sequence-specific DNA binding)	NA	NA	NA	protein INAPERTURATE POLLEN1 [Populus trichocarpa]	0.00455444	-7.77851	0.0331851	0.243888	down	Potri.001G120700	GO:0001228(transcriptional activator activity, RNA polymerase II transcription regulatory region sequence-specific DNA binding);GO:0005634(nucleus);GO:0005737(cytoplasm);GO:0006351(transcription, DNA-templated);GO:0010584(pollen exine formation);GO:0043565(sequence-specific DNA binding)	NA	NA	NA	protein INAPERTURATE POLLEN1 [Populus trichocarpa]	0.000197133	-12.3085	3.55285e-09	2.05898e-07	down	yes
Potri.001G121100.1	Potri.001G121100	GO:0004497(monooxygenase activity);GO:0055114(oxidation-reduction process)	00380(Tryptophan metabolism)	K11816	EC:1.14.13.168	flavin-containing monooxygenase FMO GS-OX-like 4 [Populus trichocarpa]	0.250854	-1.99508	0.0041552	0.0569443	down	Potri.001G121100	GO:0004497(monooxygenase activity);GO:0055114(oxidation-reduction process)	00380(Tryptophan metabolism)	K11816	EC:1.14.13.168	flavin-containing monooxygenase FMO GS-OX-like 4 [Populus trichocarpa]	0.294326	-1.76451	0.00582923	0.0672554	down	yes
Potri.001G124000.1	Potri.001G124000	GO:0000209(protein polyubiquitination);GO:0005886(plasma membrane);GO:0043161(proteasome-mediated ubiquitin-dependent protein catabolic process);GO:0061630(ubiquitin protein ligase activity)	04141(Protein processing in endoplasmic reticulum)	K10636	EC:2.3.2.27	E3 ubiquitin protein ligase RIN2 [Populus trichocarpa]	6.34184	2.6649	0.00994583	0.108368	up	Potri.001G124000	GO:0000209(protein polyubiquitination);GO:0005886(plasma membrane);GO:0043161(proteasome-mediated ubiquitin-dependent protein catabolic process);GO:0061630(ubiquitin protein ligase activity)	04141(Protein processing in endoplasmic reticulum)	K10636	EC:2.3.2.27	E3 ubiquitin protein ligase RIN2 [Populus trichocarpa]	0.00677932	-7.20464	1.33215e-11	2.30924e-09	down	yes
Potri.001G125700.1	Potri.001G125700	GO:0005634(nucleus);GO:0008150(biological_process)	03010(Ribosome)	K02985	NA	uncharacterized protein LOC18094018 isoform X2 [Populus trichocarpa]	2.6638	1.41349	0.00119722	0.0217016	up	Potri.001G125700	GO:0005634(nucleus);GO:0008150(biological_process)	03010(Ribosome)	K02985	NA	uncharacterized protein LOC18094018 isoform X2 [Populus trichocarpa]	2.88238	1.52726	0.000322248	0.00638202	up	yes
Potri.001G128800.2	Potri.001G128800	GO:0005515(protein binding);GO:0005634(nucleus);GO:0005783(endoplasmic reticulum);GO:0005794(Golgi apparatus);GO:0005829(cytosol);GO:0005886(plasma membrane);GO:0012505(endomembrane system);GO:0030136(clathrin-coated vesicle);GO:0030276(clathrin binding)	04144(Endocytosis)	K11247	NA	SH3 domain-containing protein 1 [Populus trichocarpa]	0.000358124	-11.4473	1.38474e-08	7.03272e-07	down	Potri.001G128800	GO:0005515(protein binding);GO:0005634(nucleus);GO:0005783(endoplasmic reticulum);GO:0005794(Golgi apparatus);GO:0005829(cytosol);GO:0005886(plasma membrane);GO:0012505(endomembrane system);GO:0030136(clathrin-coated vesicle);GO:0030276(clathrin binding)	04144(Endocytosis)	K11247	NA	SH3 domain-containing protein 1 [Populus trichocarpa]	0.000358124	-11.4473	1.20057e-08	5.60472e-07	down	yes
Potri.001G130400.1	Potri.001G130400	GO:0000398(mRNA splicing, via spliceosome);GO:0003723(RNA binding);GO:0004519(endonuclease activity);GO:0005739(mitochondrion);GO:0009451(RNA modification)	NA	NA	NA	PREDICTED: pentatricopeptide repeat-containing protein At3g61360 [Populus euphratica]	0.125825	-2.99051	0.0314519	0.236268	down	Potri.001G130400	GO:0000398(mRNA splicing, via spliceosome);GO:0003723(RNA binding);GO:0004519(endonuclease activity);GO:0005739(mitochondrion);GO:0009451(RNA modification)	NA	NA	NA	PREDICTED: pentatricopeptide repeat-containing protein At3g61360 [Populus euphratica]	0.0164467	-5.92606	1.11413e-06	3.45576e-05	down	yes
Potri.001G130800.3	Potri.001G130800	NA	NA	NA	NA	uncharacterized protein LOC7483284 [Populus trichocarpa]	16.3924	4.03495	0.00901543	0.101146	up	Potri.001G130800	NA	NA	NA	NA	uncharacterized protein LOC7483284 [Populus trichocarpa]	83.5101	6.38388	0.00252852	0.0346465	up	yes
Potri.001G131500.3	Potri.001G131500	NA	NA	NA	NA	uncharacterized protein LOC18094073 [Populus trichocarpa]	0.199786	-2.32347	0.0246931	0.201849	down	Potri.001G131500	NA	NA	NA	NA	uncharacterized protein LOC18094073 [Populus trichocarpa]	0.109064	-3.19676	0.00123853	0.0196119	down	yes
Potri.001G131700.1	Potri.001G131700	GO:0005739(mitochondrion);GO:0008150(biological_process);GO:0008270(zinc ion binding)	NA	NA	NA	hypothetical protein POPTR_001G131700 [Populus trichocarpa]	2448.18	11.2575	8.57653e-06	0.000273028	up	Potri.001G131700	GO:0005739(mitochondrion);GO:0008150(biological_process);GO:0008270(zinc ion binding)	NA	NA	NA	hypothetical protein POPTR_001G131700 [Populus trichocarpa]	1114.59	10.1223	0.000136131	0.00301371	up	yes
Potri.001G140200.3	Potri.001G140200	GO:0008150(biological_process);GO:0016021(integral component of membrane)	NA	NA	NA	uncharacterized membrane protein At4g09580 [Populus trichocarpa]	2.42778	1.27964	0.00359152	0.0508346	up	Potri.001G140200	GO:0008150(biological_process);GO:0016021(integral component of membrane)	NA	NA	NA	uncharacterized membrane protein At4g09580 [Populus trichocarpa]	0.398164	-1.32857	0.018976	0.16183	down	yes
Potri.001G143400.5	Potri.001G143400	GO:0006508(proteolysis);GO:0008233(peptidase activity);GO:0009507(chloroplast);GO:0016021(integral component of membrane)	00970(Aminoacyl-tRNA biosynthesis)	K01883	EC:6.1.1.16	uncharacterized protein LOC18094177 isoform X1 [Populus trichocarpa]	2.63586	1.39827	0.0299956	0.229383	up	Potri.001G143400	GO:0006508(proteolysis);GO:0008233(peptidase activity);GO:0009507(chloroplast);GO:0016021(integral component of membrane)	00970(Aminoacyl-tRNA biosynthesis)	K01883	EC:6.1.1.16	uncharacterized protein LOC18094177 isoform X1 [Populus trichocarpa]	3.31862	1.73059	0.00858608	0.0899884	up	yes
Potri.001G143400.8	Potri.001G143400	GO:0006508(proteolysis);GO:0008233(peptidase activity);GO:0009507(chloroplast);GO:0016021(integral component of membrane)	00970(Aminoacyl-tRNA biosynthesis)	K01883	EC:6.1.1.16	PREDICTED: uncharacterized protein LOC105121580 isoform X1 [Populus euphratica]	2.54883	1.34983	0.0165109	0.154506	up	Potri.001G143400	GO:0006508(proteolysis);GO:0008233(peptidase activity);GO:0009507(chloroplast);GO:0016021(integral component of membrane)	00970(Aminoacyl-tRNA biosynthesis)	K01883	EC:6.1.1.16	PREDICTED: uncharacterized protein LOC105121580 isoform X1 [Populus euphratica]	3.03906	1.60362	0.0189586	0.161755	up	yes
Potri.001G145500.3	Potri.001G145500	GO:0003674(molecular_function);GO:0046786(viral replication complex formation and maintenance)	NA	NA	NA	tobamovirus multiplication protein 2B isoform X2 [Populus trichocarpa]	18.2301	4.18825	0.0455048	0.296757	up	Potri.001G145500	GO:0003674(molecular_function);GO:0046786(viral replication complex formation and maintenance)	NA	NA	NA	tobamovirus multiplication protein 2B isoform X2 [Populus trichocarpa]	38.5009	5.26682	0.0339479	0.2409	up	yes
Potri.001G145900.2	Potri.001G145900	GO:0004439(phosphatidylinositol-4,5-bisphosphate 5-phosphatase activity);GO:0004445(inositol-polyphosphate 5-phosphatase activity);GO:0005737(cytoplasm);GO:0009737(response to abscisic acid);GO:0009738(abscisic acid-activated signaling pathway);GO:0009845(seed germination);GO:0032957(inositol trisphosphate metabolic process);GO:0034485(phosphatidylinositol-3,4,5-trisphosphate 5-phosphatase activi…	00562(Inositol phosphate metabolism);04070(Phosphatidylinositol signaling system)	K20279	EC:3.1.3.36	PREDICTED: type I inositol 1,4,5-trisphosphate 5-phosphatase 2-like [Populus euphratica]	0.297464	-1.74921	9.27607e-05	0.00246737	down	Potri.001G145900	GO:0004439(phosphatidylinositol-4,5-bisphosphate 5-phosphatase activity);GO:0004445(inositol-polyphosphate 5-phosphatase activity);GO:0005737(cytoplasm);GO:0009737(response to abscisic acid);GO:0009738(abscisic acid-activated signaling pathway);GO:0009845(seed germination);GO:0032957(inositol trisphosphate metabolic process);GO:0034485(phosphatidylinositol-3,4,5-trisphosphate 5-phosphatase activi…	00562(Inositol phosphate metabolism);04070(Phosphatidylinositol signaling system)	K20279	EC:3.1.3.36	PREDICTED: type I inositol 1,4,5-trisphosphate 5-phosphatase 2-like [Populus euphratica]	0.409544	-1.28791	0.000230411	0.00477121	down	yes
Potri.001G145900.4	Potri.001G145900	GO:0004439(phosphatidylinositol-4,5-bisphosphate 5-phosphatase activity);GO:0004445(inositol-polyphosphate 5-phosphatase activity);GO:0005737(cytoplasm);GO:0009737(response to abscisic acid);GO:0009738(abscisic acid-activated signaling pathway);GO:0009845(seed germination);GO:0032957(inositol trisphosphate metabolic process);GO:0034485(phosphatidylinositol-3,4,5-trisphosphate 5-phosphatase activi…	00562(Inositol phosphate metabolism);04070(Phosphatidylinositol signaling system)	K20279	EC:3.1.3.36	type I inositol polyphosphate 5-phosphatase 2 isoform X1 [Populus trichocarpa]	0.254943	-1.97175	0.0225896	0.189794	down	Potri.001G145900	GO:0004439(phosphatidylinositol-4,5-bisphosphate 5-phosphatase activity);GO:0004445(inositol-polyphosphate 5-phosphatase activity);GO:0005737(cytoplasm);GO:0009737(response to abscisic acid);GO:0009738(abscisic acid-activated signaling pathway);GO:0009845(seed germination);GO:0032957(inositol trisphosphate metabolic process);GO:0034485(phosphatidylinositol-3,4,5-trisphosphate 5-phosphatase activi…	00562(Inositol phosphate metabolism);04070(Phosphatidylinositol signaling system)	K20279	EC:3.1.3.36	type I inositol polyphosphate 5-phosphatase 2 isoform X1 [Populus trichocarpa]	0.314901	-1.66703	0.0450209	0.289796	down	yes
Potri.001G146200.14	Potri.001G146200	GO:0000156(phosphorelay response regulator activity);GO:0000160(phosphorelay signal transduction system);GO:0003677(DNA binding);GO:0003700(DNA binding transcription factor activity);GO:0005515(protein binding);GO:0005634(nucleus);GO:0006351(transcription, DNA-templated);GO:0006355(regulation of transcription, DNA-templated);GO:0007623(circadian rhythm)	04075(Plant hormone signal transduction)	K14491	NA	two-component response regulator-like APRR2 isoform X2 [Populus trichocarpa]	3014.8	11.5578	9.10336e-09	5.02621e-07	up	Potri.001G146200	GO:0000156(phosphorelay response regulator activity);GO:0000160(phosphorelay signal transduction system);GO:0003677(DNA binding);GO:0003700(DNA binding transcription factor activity);GO:0005515(protein binding);GO:0005634(nucleus);GO:0006351(transcription, DNA-templated);GO:0006355(regulation of transcription, DNA-templated);GO:0007623(circadian rhythm)	04075(Plant hormone signal transduction)	K14491	NA	two-component response regulator-like APRR2 isoform X2 [Populus trichocarpa]	1372.47	10.4226	4.75309e-08	1.78823e-06	up	yes
Potri.001G146200.5	Potri.001G146200	GO:0000156(phosphorelay response regulator activity);GO:0000160(phosphorelay signal transduction system);GO:0003677(DNA binding);GO:0003700(DNA binding transcription factor activity);GO:0005515(protein binding);GO:0005634(nucleus);GO:0006351(transcription, DNA-templated);GO:0006355(regulation of transcription, DNA-templated);GO:0007623(circadian rhythm)	04075(Plant hormone signal transduction)	K14491	NA	two-component response regulator-like APRR2 isoform X4 [Populus trichocarpa]	0.000955852	-10.0309	0.0157743	0.149839	down	Potri.001G146200	GO:0000156(phosphorelay response regulator activity);GO:0000160(phosphorelay signal transduction system);GO:0003677(DNA binding);GO:0003700(DNA binding transcription factor activity);GO:0005515(protein binding);GO:0005634(nucleus);GO:0006351(transcription, DNA-templated);GO:0006355(regulation of transcription, DNA-templated);GO:0007623(circadian rhythm)	04075(Plant hormone signal transduction)	K14491	NA	two-component response regulator-like APRR2 isoform X4 [Populus trichocarpa]	0.000955852	-10.0309	0.0132081	0.124103	down	yes
Potri.001G147700.2	Potri.001G147700	GO:0004672(protein kinase activity);GO:0004674(protein serine/threonine kinase activity);GO:0005524(ATP binding);GO:0005886(plasma membrane);GO:0006468(protein phosphorylation);GO:0007169(transmembrane receptor protein tyrosine kinase signaling pathway);GO:0009506(plasmodesma);GO:0016021(integral component of membrane)	NA	NA	NA	PREDICTED: probable LRR receptor-like serine/threonine-protein kinase At1g14390 isoform X2 [Populus euphratica]	0.388937	-1.36239	0.023138	0.1932	down	Potri.001G147700	GO:0004672(protein kinase activity);GO:0004674(protein serine/threonine kinase activity);GO:0005524(ATP binding);GO:0005886(plasma membrane);GO:0006468(protein phosphorylation);GO:0007169(transmembrane receptor protein tyrosine kinase signaling pathway);GO:0009506(plasmodesma);GO:0016021(integral component of membrane)	NA	NA	NA	PREDICTED: probable LRR receptor-like serine/threonine-protein kinase At1g14390 isoform X2 [Populus euphratica]	0.389061	-1.36193	0.0358325	0.249192	down	yes
Potri.001G155500.3	Potri.001G155500	GO:0000062(fatty-acyl-CoA binding);GO:0003995(acyl-CoA dehydrogenase activity);GO:0005777(peroxisome);GO:0009055(electron transfer activity);GO:0033539(fatty acid beta-oxidation using acyl-CoA dehydrogenase);GO:0050660(flavin adenine dinucleotide binding);GO:0052890(oxidoreductase activity, acting on the CH-CH group of donors, with a flavin as acceptor);GO:0055088(lipid homeostasis)	00071(Fatty acid degradation);00592(alpha-Linolenic acid metabolism);01040(Biosynthesis of unsaturated fatty acids);04146(Peroxisome)	K00232	EC:1.3.3.6	peroxisomal acyl-coenzyme A oxidase 1 [Populus trichocarpa]	3.87653	1.95477	0.000268587	0.00623766	up	Potri.001G155500	GO:0000062(fatty-acyl-CoA binding);GO:0003995(acyl-CoA dehydrogenase activity);GO:0005777(peroxisome);GO:0009055(electron transfer activity);GO:0033539(fatty acid beta-oxidation using acyl-CoA dehydrogenase);GO:0050660(flavin adenine dinucleotide binding);GO:0052890(oxidoreductase activity, acting on the CH-CH group of donors, with a flavin as acceptor);GO:0055088(lipid homeostasis)	00071(Fatty acid degradation);00592(alpha-Linolenic acid metabolism);01040(Biosynthesis of unsaturated fatty acids);04146(Peroxisome)	K00232	EC:1.3.3.6	peroxisomal acyl-coenzyme A oxidase 1 [Populus trichocarpa]	3.0637	1.61527	0.00988059	0.100151	up	yes
Potri.001G156700.5	Potri.001G156700	GO:0005634(nucleus);GO:0007165(signal transduction);GO:0035091(phosphatidylinositol binding)	NA	NA	NA	VAN3-binding protein [Populus trichocarpa]	0.000437623	-11.158	8.32293e-09	4.70625e-07	down	Potri.001G156700	GO:0005634(nucleus);GO:0007165(signal transduction);GO:0035091(phosphatidylinositol binding)	NA	NA	NA	VAN3-binding protein [Populus trichocarpa]	0.00306336	-8.35067	0.0271989	0.206743	down	yes
Potri.001G160300.1	Potri.001G160300	GO:0004674(protein serine/threonine kinase activity);GO:0005886(plasma membrane)	NA	NA	NA	C-type lectin receptor-like tyrosine-protein kinase At1g52310 [Populus trichocarpa]	0.000120119	-13.0233	6.61659e-10	6.61472e-08	down	Potri.001G160300	GO:0004674(protein serine/threonine kinase activity);GO:0005886(plasma membrane)	NA	NA	NA	C-type lectin receptor-like tyrosine-protein kinase At1g52310 [Populus trichocarpa]	0.000120119	-13.0233	6.38825e-10	5.35017e-08	down	yes
Potri.001G160300.4	Potri.001G160300	GO:0004674(protein serine/threonine kinase activity);GO:0005886(plasma membrane)	NA	NA	NA	C-type lectin receptor-like tyrosine-protein kinase At1g52310 [Populus trichocarpa]	3.41328	1.77116	0.0456216	0.297202	up	Potri.001G160300	GO:0004674(protein serine/threonine kinase activity);GO:0005886(plasma membrane)	NA	NA	NA	C-type lectin receptor-like tyrosine-protein kinase At1g52310 [Populus trichocarpa]	4.63807	2.21352	0.00642603	0.0725556	up	yes
Potri.001G161400.5	Potri.001G161400	GO:0005887(integral component of plasma membrane);GO:0008553(proton-exporting ATPase activity, phosphorylative mechanism);GO:0043231(intracellular membrane-bounded organelle);GO:0051453(regulation of intracellular pH);GO:1902600(proton transmembrane transport)	00190(Oxidative phosphorylation)	K01535	EC:3.6.3.6	ATPase 10, plasma membrane-type [Populus trichocarpa]	4.92444	2.29996	0.00356309	0.0505178	up	Potri.001G161400	GO:0005887(integral component of plasma membrane);GO:0008553(proton-exporting ATPase activity, phosphorylative mechanism);GO:0043231(intracellular membrane-bounded organelle);GO:0051453(regulation of intracellular pH);GO:1902600(proton transmembrane transport)	00190(Oxidative phosphorylation)	K01535	EC:3.6.3.6	ATPase 10, plasma membrane-type [Populus trichocarpa]	4.37667	2.12983	0.0310983	0.227152	up	yes
Potri.001G164700.1	Potri.001G164700	GO:0006457(protein folding)	NA	NA	NA	PREDICTED: dnaJ homolog subfamily B member 9-like isoform X2 [Populus euphratica]	3213.52	11.6499	2.78104e-08	1.25556e-06	up	Potri.001G164700	GO:0006457(protein folding)	NA	NA	NA	PREDICTED: dnaJ homolog subfamily B member 9-like isoform X2 [Populus euphratica]	2642.4	11.3676	1.17576e-07	4.05031e-06	up	yes
Potri.001G164700.2	Potri.001G164700	GO:0006457(protein folding)	NA	NA	NA	chaperone protein DnaJ isoform X1 [Populus trichocarpa]	245.132	7.93741	5.21491e-05	0.00147284	up	Potri.001G164700	GO:0006457(protein folding)	NA	NA	NA	chaperone protein DnaJ isoform X1 [Populus trichocarpa]	475.443	8.89313	2.34981e-05	0.000608816	up	yes
Potri.001G166400.3	Potri.001G166400	GO:0000145(exocyst);GO:0005634(nucleus);GO:0005829(cytosol);GO:0006887(exocytosis);GO:0006904(vesicle docking involved in exocytosis)	NA	NA	NA	exocyst complex component EXO70A1 [Populus trichocarpa]	2.47097	1.30508	2.56107e-05	0.000765188	up	Potri.001G166400	GO:0000145(exocyst);GO:0005634(nucleus);GO:0005829(cytosol);GO:0006887(exocytosis);GO:0006904(vesicle docking involved in exocytosis)	NA	NA	NA	exocyst complex component EXO70A1 [Populus trichocarpa]	2.68376	1.42426	7.1967e-06	0.000200482	up	yes
Potri.001G168200.2	Potri.001G168200	GO:0008728(GTP diphosphokinase activity);GO:0008893(guanosine-3',5'-bis(diphosphate) 3'-diphosphatase activity);GO:0009507(chloroplast);GO:0015969(guanosine tetraphosphate metabolic process);GO:0042594(response to starvation)	NA	NA	NA	RELA/SPOT-like protein 3 [Populus tomentosa]	2.76222	1.46583	1.17902e-05	0.00036869	up	Potri.001G168200	GO:0008728(GTP diphosphokinase activity);GO:0008893(guanosine-3',5'-bis(diphosphate) 3'-diphosphatase activity);GO:0009507(chloroplast);GO:0015969(guanosine tetraphosphate metabolic process);GO:0042594(response to starvation)	NA	NA	NA	RELA/SPOT-like protein 3 [Populus tomentosa]	2.3422	1.22786	0.009425	0.0966205	up	yes
Potri.001G177300.3	Potri.001G177300	GO:0004849(uridine kinase activity);GO:0005829(cytosol);GO:0006206(pyrimidine nucleobase metabolic process);GO:0043097(pyrimidine nucleoside salvage)	00630(Glyoxylate and dicarboxylate metabolism);00561(Glycerolipid metabolism);00260(Glycine, serine and threonine metabolism)	K15918	EC:2.7.1.31	D-glycerate 3-kinase, chloroplastic isoform X1 [Populus trichocarpa]	2.21122	1.14485	0.0173776	0.159645	up	Potri.001G177300	GO:0004849(uridine kinase activity);GO:0005829(cytosol);GO:0006206(pyrimidine nucleobase metabolic process);GO:0043097(pyrimidine nucleoside salvage)	00630(Glyoxylate and dicarboxylate metabolism);00561(Glycerolipid metabolism);00260(Glycine, serine and threonine metabolism)	K15918	EC:2.7.1.31	D-glycerate 3-kinase, chloroplastic isoform X1 [Populus trichocarpa]	2.88869	1.53042	0.000715541	0.0125457	up	yes
Potri.001G179000.1	Potri.001G179000	GO:0005794(Golgi apparatus);GO:0016021(integral component of membrane);GO:0016757(transferase activity, transferring glycosyl groups);GO:0046506(sulfolipid biosynthetic process)	00561(Glycerolipid metabolism)	K06119	EC:2.4.1.-	PREDICTED: uncharacterized protein LOC105109641 isoform X1 [Populus euphratica]	2084.49	11.0255	7.3005e-08	2.86758e-06	up	Potri.001G179000	GO:0005794(Golgi apparatus);GO:0016021(integral component of membrane);GO:0016757(transferase activity, transferring glycosyl groups);GO:0046506(sulfolipid biosynthetic process)	00561(Glycerolipid metabolism)	K06119	EC:2.4.1.-	PREDICTED: uncharacterized protein LOC105109641 isoform X1 [Populus euphratica]	5093.55	12.3145	3.4757e-14	1.05042e-11	up	yes
Potri.001G179200.7	Potri.001G179200	GO:0006886(intracellular protein transport);GO:0006888(ER to Golgi vesicle-mediated transport);GO:0006890(retrograde vesicle-mediated transport, Golgi to ER);GO:0006891(intra-Golgi vesicle-mediated transport);GO:0030126(COPI vesicle coat)	NA	NA	NA	PREDICTED: coatomer subunit beta'-2 isoform X1 [Populus euphratica]	0.000463661	-11.0746	4.53873e-09	2.9242e-07	down	Potri.001G179200	GO:0006886(intracellular protein transport);GO:0006888(ER to Golgi vesicle-mediated transport);GO:0006890(retrograde vesicle-mediated transport, Golgi to ER);GO:0006891(intra-Golgi vesicle-mediated transport);GO:0030126(COPI vesicle coat)	NA	NA	NA	PREDICTED: coatomer subunit beta'-2 isoform X1 [Populus euphratica]	0.000463661	-11.0746	3.94332e-09	2.24745e-07	down	yes
Potri.001G182700.4	Potri.001G182700	GO:0009507(chloroplast);GO:0016021(integral component of membrane)	04122(Sulfur relay system)	K11996	EC:2.7.7.80;EC:2.8.1.11	PREDICTED: uncharacterized protein LOC105116005 isoform X1 [Populus euphratica]	827.98	9.69345	0.0137759	0.136296	up	Potri.001G182700	GO:0009507(chloroplast);GO:0016021(integral component of membrane)	04122(Sulfur relay system)	K11996	EC:2.7.7.80;EC:2.8.1.11	PREDICTED: uncharacterized protein LOC105116005 isoform X1 [Populus euphratica]	468.897	8.87313	0.0351787	0.246379	up	yes
Potri.001G183600.2	Potri.001G183600	GO:0003674(molecular_function);GO:0005515(protein binding);GO:0005802(trans-Golgi network);GO:0005886(plasma membrane);GO:0008017(microtubule binding);GO:0008150(biological_process);GO:0009507(chloroplast);GO:0016021(integral component of membrane)	NA	NA	NA	hypothetical protein [Populus tomentosa]	0.000503876	-10.9546	2.50938e-08	1.15446e-06	down	Potri.001G183600	GO:0003674(molecular_function);GO:0005515(protein binding);GO:0005802(trans-Golgi network);GO:0005886(plasma membrane);GO:0008017(microtubule binding);GO:0008150(biological_process);GO:0009507(chloroplast);GO:0016021(integral component of membrane)	NA	NA	NA	hypothetical protein [Populus tomentosa]	0.000503876	-10.9546	2.20162e-08	9.27426e-07	down	yes
Potri.001G184100.3	Potri.001G184100	GO:0003677(DNA binding);GO:0003700(DNA binding transcription factor activity);GO:0005515(protein binding);GO:0005634(nucleus);GO:0006351(transcription, DNA-templated);GO:0006355(regulation of transcription, DNA-templated);GO:0008289(lipid binding);GO:0009845(seed germination);GO:0009913(epidermal cell differentiation);GO:0043565(sequence-specific DNA binding);GO:0048497(maintenance of floral orga…	NA	NA	NA	PREDICTED: homeobox-leucine zipper protein GLABRA 2 [Populus euphratica]	5.35543	2.421	0.018637	0.167442	up	Potri.001G184100	GO:0003677(DNA binding);GO:0003700(DNA binding transcription factor activity);GO:0005515(protein binding);GO:0005634(nucleus);GO:0006351(transcription, DNA-templated);GO:0006355(regulation of transcription, DNA-templated);GO:0008289(lipid binding);GO:0009845(seed germination);GO:0009913(epidermal cell differentiation);GO:0043565(sequence-specific DNA binding);GO:0048497(maintenance of floral orga…	NA	NA	NA	PREDICTED: homeobox-leucine zipper protein GLABRA 2 [Populus euphratica]	9.1203	3.18908	0.0151839	0.137741	up	yes
Potri.001G184100.5	Potri.001G184100	GO:0003677(DNA binding);GO:0003700(DNA binding transcription factor activity);GO:0005515(protein binding);GO:0005634(nucleus);GO:0006351(transcription, DNA-templated);GO:0006355(regulation of transcription, DNA-templated);GO:0008289(lipid binding);GO:0009845(seed germination);GO:0009913(epidermal cell differentiation);GO:0043565(sequence-specific DNA binding);GO:0048497(maintenance of floral orga…	NA	NA	NA	hypothetical protein POPTR_001G184100 [Populus trichocarpa]	7376.11	12.8486	0.000528921	0.0110743	up	Potri.001G184100	GO:0003677(DNA binding);GO:0003700(DNA binding transcription factor activity);GO:0005515(protein binding);GO:0005634(nucleus);GO:0006351(transcription, DNA-templated);GO:0006355(regulation of transcription, DNA-templated);GO:0008289(lipid binding);GO:0009845(seed germination);GO:0009913(epidermal cell differentiation);GO:0043565(sequence-specific DNA binding);GO:0048497(maintenance of floral orga…	NA	NA	NA	hypothetical protein POPTR_001G184100 [Populus trichocarpa]	1020.02	9.99438	7.64982e-08	2.75832e-06	up	yes
Potri.001G185600.1	Potri.001G185600	GO:0000287(magnesium ion binding);GO:0003862(3-isopropylmalate dehydrogenase activity);GO:0005829(cytosol);GO:0009098(leucine biosynthetic process);GO:0009507(chloroplast);GO:0009536(plastid);GO:0009570(chloroplast stroma);GO:0009941(chloroplast envelope);GO:0051287(NAD binding);GO:0055114(oxidation-reduction process)	00660(C5-Branched dibasic acid metabolism);00290(Valine, leucine and isoleucine biosynthesis)	K00052	EC:1.1.1.85	PREDICTED: 3-isopropylmalate dehydrogenase, chloroplastic-like [Populus euphratica]	0.017534	-5.8337	9.84878e-05	0.00260013	down	Potri.001G185600	GO:0000287(magnesium ion binding);GO:0003862(3-isopropylmalate dehydrogenase activity);GO:0005829(cytosol);GO:0009098(leucine biosynthetic process);GO:0009507(chloroplast);GO:0009536(plastid);GO:0009570(chloroplast stroma);GO:0009941(chloroplast envelope);GO:0051287(NAD binding);GO:0055114(oxidation-reduction process)	00660(C5-Branched dibasic acid metabolism);00290(Valine, leucine and isoleucine biosynthesis)	K00052	EC:1.1.1.85	PREDICTED: 3-isopropylmalate dehydrogenase, chloroplastic-like [Populus euphratica]	0.116102	-3.10653	0.0242614	0.191256	down	yes
Potri.001G185900.1	Potri.001G185900	GO:0001046(core promoter sequence-specific DNA binding);GO:0001228(transcriptional activator activity, RNA polymerase II transcription regulatory region sequence-specific DNA binding);GO:0005634(nucleus);GO:0006366(transcription by RNA polymerase II)	NA	NA	NA	transcription factor bHLH68 isoform X3 [Populus trichocarpa]	29.7578	4.8952	0.00252033	0.0386928	up	Potri.001G185900	GO:0001046(core promoter sequence-specific DNA binding);GO:0001228(transcriptional activator activity, RNA polymerase II transcription regulatory region sequence-specific DNA binding);GO:0005634(nucleus);GO:0006366(transcription by RNA polymerase II)	NA	NA	NA	transcription factor bHLH68 isoform X3 [Populus trichocarpa]	53.0902	5.73038	0.00048333	0.00903101	up	yes
Potri.001G186100.3	Potri.001G186100	GO:0003700(DNA binding transcription factor activity);GO:0005515(protein binding);GO:0005622(intracellular);GO:0005634(nucleus);GO:0006351(transcription, DNA-templated);GO:0006355(regulation of transcription, DNA-templated);GO:0006417(regulation of translation);GO:0009733(response to auxin);GO:0009734(auxin-activated signaling pathway)	04075(Plant hormone signal transduction)	K14484	NA	auxin-responsive protein IAA27 isoform X2 [Populus trichocarpa]	0.000198059	-12.3018	3.88342e-09	2.61573e-07	down	Potri.001G186100	GO:0003700(DNA binding transcription factor activity);GO:0005515(protein binding);GO:0005622(intracellular);GO:0005634(nucleus);GO:0006351(transcription, DNA-templated);GO:0006355(regulation of transcription, DNA-templated);GO:0006417(regulation of translation);GO:0009733(response to auxin);GO:0009734(auxin-activated signaling pathway)	04075(Plant hormone signal transduction)	K14484	NA	auxin-responsive protein IAA27 isoform X2 [Populus trichocarpa]	0.000198059	-12.3018	3.37032e-09	1.9868e-07	down	yes
Potri.001G189400.2	Potri.001G189400	GO:0051213(dioxygenase activity)	00270(Cysteine and methionine metabolism)	NA	NA	flavonol synthase/flavanone 3-hydroxylase [Populus trichocarpa]	0.000595433	-10.7138	0.0446937	0.293543	down	Potri.001G189400	GO:0051213(dioxygenase activity)	00270(Cysteine and methionine metabolism)	NA	NA	flavonol synthase/flavanone 3-hydroxylase [Populus trichocarpa]	0.000595433	-10.7138	0.0390741	0.263808	down	yes
Potri.001G190300.1	Potri.001G190300	GO:0003700(DNA binding transcription factor activity);GO:0005515(protein binding);GO:0005634(nucleus);GO:0006351(transcription, DNA-templated);GO:0006355(regulation of transcription, DNA-templated);GO:0009733(response to auxin);GO:0009734(auxin-activated signaling pathway)	04075(Plant hormone signal transduction)	K14484	NA	auxin-responsive protein IAA26 isoform X1 [Populus trichocarpa]	4.42658	2.14619	0.0157562	0.149699	up	Potri.001G190300	GO:0003700(DNA binding transcription factor activity);GO:0005515(protein binding);GO:0005634(nucleus);GO:0006351(transcription, DNA-templated);GO:0006355(regulation of transcription, DNA-templated);GO:0009733(response to auxin);GO:0009734(auxin-activated signaling pathway)	04075(Plant hormone signal transduction)	K14484	NA	auxin-responsive protein IAA26 isoform X1 [Populus trichocarpa]	12.3175	3.62264	0.000189533	0.00402152	up	yes
Potri.001G191200.2	Potri.001G191200	GO:0000725(recombinational repair)	NA	NA	NA	hypothetical protein POPTR_001G191200 [Populus trichocarpa]	0.34919	-1.51792	0.0409707	0.278454	down	Potri.001G191200	GO:0000725(recombinational repair)	NA	NA	NA	hypothetical protein POPTR_001G191200 [Populus trichocarpa]	0.371127	-1.43001	0.0230904	0.184936	down	yes
Potri.001G191900.1	Potri.001G191900	GO:0000160(phosphorelay signal transduction system);GO:0005634(nucleus);GO:0005737(cytoplasm);GO:0009736(cytokinin-activated signaling pathway);GO:0009927(histidine phosphotransfer kinase activity);GO:0016310(phosphorylation);GO:0043424(protein histidine kinase binding)	04075(Plant hormone signal transduction)	K14490	NA	histidine-containing phosphotransfer protein 6 [Vitis vinifera]	0.258847	-1.94983	0.00119648	0.0216986	down	Potri.001G191900	GO:0000160(phosphorelay signal transduction system);GO:0005634(nucleus);GO:0005737(cytoplasm);GO:0009736(cytokinin-activated signaling pathway);GO:0009927(histidine phosphotransfer kinase activity);GO:0016310(phosphorylation);GO:0043424(protein histidine kinase binding)	04075(Plant hormone signal transduction)	K14490	NA	histidine-containing phosphotransfer protein 6 [Vitis vinifera]	0.472145	-1.0827	0.000332817	0.00655461	down	yes
Potri.001G192500.1	Potri.001G192500	NA	NA	NA	NA	proline-rich receptor-like protein kinase PERK2 [Populus trichocarpa]	2047.27	10.9995	0.00148789	0.0258125	up	Potri.001G192500	NA	NA	NA	NA	proline-rich receptor-like protein kinase PERK2 [Populus trichocarpa]	2730.71	11.4151	0.0223165	0.181094	up	yes
Potri.001G193400.2	Potri.001G193400	GO:0005634(nucleus);GO:0008150(biological_process);GO:0009507(chloroplast)	00052(Galactose metabolism);00520(Amino sugar and nucleotide sugar metabolism)	K01784	EC:5.1.3.2	uncharacterized protein LOC7475121 isoform X1 [Populus trichocarpa]	2.57054	1.36207	0.000404316	0.00886542	up	Potri.001G193400	GO:0005634(nucleus);GO:0008150(biological_process);GO:0009507(chloroplast)	00052(Galactose metabolism);00520(Amino sugar and nucleotide sugar metabolism)	K01784	EC:5.1.3.2	uncharacterized protein LOC7475121 isoform X1 [Populus trichocarpa]	3.8428	1.94216	8.44437e-05	0.00197324	up	yes
Potri.001G193900.1	Potri.001G193900	GO:0003674(molecular_function);GO:0005634(nucleus);GO:0008150(biological_process)	00230(Purine metabolism)	K00759	EC:2.4.2.7	uncharacterized protein At1g51745 isoform X1 [Populus trichocarpa]	3.15506	1.65767	0.00887142	0.0999697	up	Potri.001G193900	GO:0003674(molecular_function);GO:0005634(nucleus);GO:0008150(biological_process)	00230(Purine metabolism)	K00759	EC:2.4.2.7	uncharacterized protein At1g51745 isoform X1 [Populus trichocarpa]	4.48476	2.16503	5.75498e-08	2.12973e-06	up	yes
Potri.001G196600.1	Potri.001G196600	GO:0004722(protein serine/threonine phosphatase activity);GO:0005737(cytoplasm);GO:0016787(hydrolase activity);GO:0046872(metal ion binding);GO:0005634(nucleus);GO:0005654(nucleoplasm);GO:0006470(protein dephosphorylation);GO:0009408(response to heat);GO:0009785(blue light signaling pathway)	NA	NA	NA	serine/threonine-protein phosphatase 7 inactive homolog [Populus trichocarpa]	0.00012195	-13.0014	6.8787e-10	6.82372e-08	down	Potri.001G196600	GO:0004722(protein serine/threonine phosphatase activity);GO:0005737(cytoplasm);GO:0016787(hydrolase activity);GO:0046872(metal ion binding);GO:0005634(nucleus);GO:0005654(nucleoplasm);GO:0006470(protein dephosphorylation);GO:0009408(response to heat);GO:0009785(blue light signaling pathway)	NA	NA	NA	serine/threonine-protein phosphatase 7 inactive homolog [Populus trichocarpa]	0.00012195	-13.0014	3.19511e-10	3.1295e-08	down	yes
Potri.001G201000.2	Potri.001G201000	GO:0000139(Golgi membrane);GO:0005525(GTP binding);GO:0005634(nucleus);GO:0005737(cytoplasm);GO:0005774(vacuolar membrane);GO:0005783(endoplasmic reticulum);GO:0005789(endoplasmic reticulum membrane);GO:0005886(plasma membrane);GO:0006888(ER to Golgi vesicle-mediated transport);GO:0009832(plant-type cell wall biogenesis);GO:0009932(cell tip growth);GO:0010053(root epidermal cell differentiation);…	NA	NA	NA	protein ROOT HAIR DEFECTIVE 3 isoform X1 [Populus trichocarpa]	19.1193	4.25696	7.88628e-05	0.00213604	up	Potri.001G201000	GO:0000139(Golgi membrane);GO:0005525(GTP binding);GO:0005634(nucleus);GO:0005737(cytoplasm);GO:0005774(vacuolar membrane);GO:0005783(endoplasmic reticulum);GO:0005789(endoplasmic reticulum membrane);GO:0005886(plasma membrane);GO:0006888(ER to Golgi vesicle-mediated transport);GO:0009832(plant-type cell wall biogenesis);GO:0009932(cell tip growth);GO:0010053(root epidermal cell differentiation);…	NA	NA	NA	protein ROOT HAIR DEFECTIVE 3 isoform X1 [Populus trichocarpa]	12.3724	3.62906	0.00647694	0.0729727	up	yes
Potri.001G201000.3	Potri.001G201000	GO:0000139(Golgi membrane);GO:0005525(GTP binding);GO:0005634(nucleus);GO:0005737(cytoplasm);GO:0005774(vacuolar membrane);GO:0005783(endoplasmic reticulum);GO:0005789(endoplasmic reticulum membrane);GO:0005886(plasma membrane);GO:0006888(ER to Golgi vesicle-mediated transport);GO:0009832(plant-type cell wall biogenesis);GO:0009932(cell tip growth);GO:0010053(root epidermal cell differentiation);…	NA	NA	NA	protein ROOT HAIR DEFECTIVE 3 isoform X1 [Populus trichocarpa]	24594	14.586	0.0018106	0.0300592	up	Potri.001G201000	GO:0000139(Golgi membrane);GO:0005525(GTP binding);GO:0005634(nucleus);GO:0005737(cytoplasm);GO:0005774(vacuolar membrane);GO:0005783(endoplasmic reticulum);GO:0005789(endoplasmic reticulum membrane);GO:0005886(plasma membrane);GO:0006888(ER to Golgi vesicle-mediated transport);GO:0009832(plant-type cell wall biogenesis);GO:0009932(cell tip growth);GO:0010053(root epidermal cell differentiation);…	NA	NA	NA	protein ROOT HAIR DEFECTIVE 3 isoform X1 [Populus trichocarpa]	14649.9	13.8386	1.08313e-09	8.21055e-08	up	yes
Potri.001G209700.2	Potri.001G209700	GO:0004672(protein kinase activity);GO:0004674(protein serine/threonine kinase activity);GO:0005524(ATP binding);GO:0005886(plasma membrane);GO:0006468(protein phosphorylation);GO:0007169(transmembrane receptor protein tyrosine kinase signaling pathway);GO:0009834(plant-type secondary cell wall biogenesis);GO:0016021(integral component of membrane);GO:0016301(kinase activity)	NA	NA	NA	Leucine-rich repeat protein kinase family protein, putative [Theobroma cacao]	500.597	8.9675	0.0339663	0.24759	up	Potri.001G209700	GO:0004672(protein kinase activity);GO:0004674(protein serine/threonine kinase activity);GO:0005524(ATP binding);GO:0005886(plasma membrane);GO:0006468(protein phosphorylation);GO:0007169(transmembrane receptor protein tyrosine kinase signaling pathway);GO:0009834(plant-type secondary cell wall biogenesis);GO:0016021(integral component of membrane);GO:0016301(kinase activity)	NA	NA	NA	Leucine-rich repeat protein kinase family protein, putative [Theobroma cacao]	388.277	8.60094	0.000243249	0.00500746	up	yes
Potri.001G210600.1	Potri.001G210600	GO:0003674(molecular_function);GO:0008150(biological_process);GO:0016021(integral component of membrane)	00900(Terpenoid backbone biosynthesis)	K00021	EC:1.1.1.34	zinc finger protein jing homolog isoform X1 [Populus trichocarpa]	0.324999	-1.62149	8.3095e-05	0.00223682	down	Potri.001G210600	GO:0003674(molecular_function);GO:0008150(biological_process);GO:0016021(integral component of membrane)	00900(Terpenoid backbone biosynthesis)	K00021	EC:1.1.1.34	zinc finger protein jing homolog isoform X1 [Populus trichocarpa]	0.49892	-1.00312	0.0253772	0.196785	down	yes
Potri.001G217600.2	Potri.001G217600	GO:0003723(RNA binding);GO:0004519(endonuclease activity);GO:0005515(protein binding);GO:0005739(mitochondrion);GO:0009451(RNA modification);GO:0009507(chloroplast)	NA	NA	NA	pentatricopeptide repeat-containing protein At1g05750, chloroplastic [Populus trichocarpa]	0.000360511	-11.4377	0.00286203	0.0426653	down	Potri.001G217600	GO:0003723(RNA binding);GO:0004519(endonuclease activity);GO:0005515(protein binding);GO:0005739(mitochondrion);GO:0009451(RNA modification);GO:0009507(chloroplast)	NA	NA	NA	pentatricopeptide repeat-containing protein At1g05750, chloroplastic [Populus trichocarpa]	0.000360511	-11.4377	0.00225286	0.0316822	down	yes
Potri.001G220600.2	Potri.001G220600	GO:0003723(RNA binding);GO:0005634(nucleus);GO:0005737(cytoplasm);GO:0006952(defense response);GO:0008219(cell death);GO:0009693(ethylene biosynthetic process);GO:0010150(leaf senescence)	03040(Spliceosome)	K12741	NA	PREDICTED: UBP1-associated protein 2A-like [Populus euphratica]	0.00730403	-7.09709	0.00707458	0.0846095	down	Potri.001G220600	GO:0003723(RNA binding);GO:0005634(nucleus);GO:0005737(cytoplasm);GO:0006952(defense response);GO:0008219(cell death);GO:0009693(ethylene biosynthetic process);GO:0010150(leaf senescence)	03040(Spliceosome)	K12741	NA	PREDICTED: UBP1-associated protein 2A-like [Populus euphratica]	0.00309291	-8.33682	0.000620787	0.0111504	down	yes
Potri.001G222200.5	Potri.001G222200	GO:0005515(protein binding);GO:0005509(calcium ion binding);GO:0005513(detection of calcium ion);GO:0005634(nucleus);GO:0005737(cytoplasm);GO:0005829(cytosol);GO:0009612(response to mechanical stimulus)	04016(MAPK signaling pathway - plant);04070(Phosphatidylinositol signaling system);04626(Plant-pathogen interaction)	K02183	NA	unnamed protein product [Brassica oleracea]	0.424759	-1.23528	0.0167071	0.155582	down	Potri.001G222200	GO:0005515(protein binding);GO:0005509(calcium ion binding);GO:0005513(detection of calcium ion);GO:0005634(nucleus);GO:0005737(cytoplasm);GO:0005829(cytosol);GO:0009612(response to mechanical stimulus)	04016(MAPK signaling pathway - plant);04070(Phosphatidylinositol signaling system);04626(Plant-pathogen interaction)	K02183	NA	unnamed protein product [Brassica oleracea]	0.459446	-1.12203	0.0205859	0.170865	down	yes
Potri.001G222300.1	Potri.001G222300	GO:0000175(3'-5'-exoribonuclease activity);GO:0005739(mitochondrion);GO:0090305(nucleic acid phosphodiester bond hydrolysis)	03008(Ribosome biogenesis in eukaryotes)	K13288	EC:3.1.-.-	oligoribonuclease isoform X2 [Populus trichocarpa]	0.0594834	-4.07137	0.00782168	0.0911015	down	Potri.001G222300	GO:0000175(3'-5'-exoribonuclease activity);GO:0005739(mitochondrion);GO:0090305(nucleic acid phosphodiester bond hydrolysis)	03008(Ribosome biogenesis in eukaryotes)	K13288	EC:3.1.-.-	oligoribonuclease isoform X2 [Populus trichocarpa]	0.0523095	-4.25678	0.0028824	0.0385357	down	yes
Potri.001G222700.1	Potri.001G222700	GO:0000338(protein deneddylation);GO:0003714(transcription corepressor activity);GO:0005515(protein binding);GO:0005634(nucleus);GO:0005829(cytosol);GO:0007275(multicellular organism development);GO:0008180(COP9 signalosome);GO:0009585(red, far-red light phototransduction);GO:0009640(photomorphogenesis);GO:0030163(protein catabolic process);GO:0045892(negative regulation of transcription, DNA-tem…	NA	NA	NA	PREDICTED: COP9 signalosome complex subunit 2 isoform X1 [Populus euphratica]	2.10436	1.07338	0.00649825	0.0796026	up	Potri.001G222700	GO:0000338(protein deneddylation);GO:0003714(transcription corepressor activity);GO:0005515(protein binding);GO:0005634(nucleus);GO:0005829(cytosol);GO:0007275(multicellular organism development);GO:0008180(COP9 signalosome);GO:0009585(red, far-red light phototransduction);GO:0009640(photomorphogenesis);GO:0030163(protein catabolic process);GO:0045892(negative regulation of transcription, DNA-tem…	NA	NA	NA	PREDICTED: COP9 signalosome complex subunit 2 isoform X1 [Populus euphratica]	3.21869	1.68647	0.0122721	0.117729	up	yes
Potri.001G224400.2	Potri.001G224400	GO:0005737(cytoplasm);GO:0006807(nitrogen compound metabolic process);GO:0016151(nickel cation binding);GO:1905182(positive regulation of urease activity)	NA	NA	NA	urease accessory protein F [Populus trichocarpa]	3583.26	11.8071	1.26854e-07	4.72229e-06	up	Potri.001G224400	GO:0005737(cytoplasm);GO:0006807(nitrogen compound metabolic process);GO:0016151(nickel cation binding);GO:1905182(positive regulation of urease activity)	NA	NA	NA	urease accessory protein F [Populus trichocarpa]	13506.5	13.7214	0.000199626	0.00420571	up	yes
Potri.001G226400.2	Potri.001G226400	NA	NA	NA	NA	hypothetical protein POPTR_001G226400 [Populus trichocarpa]	15151.7	13.8872	0.00106849	0.0197938	up	Potri.001G226400	NA	NA	NA	NA	hypothetical protein POPTR_001G226400 [Populus trichocarpa]	54930.9	15.7453	1.28929e-20	8.16909e-18	up	yes
Potri.001G236000.5	Potri.001G236000	GO:0003674(molecular_function);GO:0005634(nucleus);GO:0008150(biological_process)	NA	NA	NA	uncharacterized protein LOC7485723 isoform X1 [Populus trichocarpa]	5.67234	2.50394	7.93586e-06	0.000253423	up	Potri.001G236000	GO:0003674(molecular_function);GO:0005634(nucleus);GO:0008150(biological_process)	NA	NA	NA	uncharacterized protein LOC7485723 isoform X1 [Populus trichocarpa]	16.791	4.06961	5.14853e-05	0.00126104	up	yes
Potri.001G237000.1	Potri.001G237000	GO:0003674(molecular_function);GO:0005634(nucleus);GO:0005739(mitochondrion);GO:0005783(endoplasmic reticulum);GO:0008150(biological_process)	NA	NA	NA	uncharacterized protein LOC7485719 isoform X1 [Populus trichocarpa]	0.143103	-2.80488	0.000238552	0.00562834	down	Potri.001G237000	GO:0003674(molecular_function);GO:0005634(nucleus);GO:0005739(mitochondrion);GO:0005783(endoplasmic reticulum);GO:0008150(biological_process)	NA	NA	NA	uncharacterized protein LOC7485719 isoform X1 [Populus trichocarpa]	0.311472	-1.68283	0.0122578	0.117702	down	yes
Potri.001G237300.1	Potri.001G237300	GO:0005886(plasma membrane);GO:0016021(integral component of membrane);GO:0055085(transmembrane transport)	NA	NA	NA	hypothetical protein [Populus tomentosa]	0.491192	-1.02564	0.00964028	0.106096	down	Potri.001G237300	GO:0005886(plasma membrane);GO:0016021(integral component of membrane);GO:0055085(transmembrane transport)	NA	NA	NA	hypothetical protein [Populus tomentosa]	0.463734	-1.10863	0.00113645	0.0182573	down	yes
Potri.001G247100.3	Potri.001G247100	NA	NA	NA	NA	chromatin modification-related protein eaf-1 isoform X1 [Populus trichocarpa]	8.09764	3.0175	1.92813e-25	3.40664e-22	up	Potri.001G247100	NA	NA	NA	NA	chromatin modification-related protein eaf-1 isoform X1 [Populus trichocarpa]	7.55508	2.91745	2.89278e-06	8.49381e-05	up	yes
Potri.001G249200.5	Potri.001G249200	GO:0003824(catalytic activity);GO:0009228(thiamine biosynthetic process);GO:0009229(thiamine diphosphate biosynthetic process);GO:0009507(chloroplast);GO:0009536(plastid);GO:0009570(chloroplast stroma);GO:0010266(response to vitamin B1);GO:0016045(detection of bacterium);GO:0016830(carbon-carbon lyase activity);GO:0046872(metal ion binding);GO:0051536(iron-sulfur cluster binding);GO:0051539(4 iro…	00730(Thiamine metabolism)	K03147	EC:4.1.99.17	phosphomethylpyrimidine synthase, chloroplastic [Populus trichocarpa]	0.000644878	-10.5987	1.29939e-08	6.68105e-07	down	Potri.001G249200	GO:0003824(catalytic activity);GO:0009228(thiamine biosynthetic process);GO:0009229(thiamine diphosphate biosynthetic process);GO:0009507(chloroplast);GO:0009536(plastid);GO:0009570(chloroplast stroma);GO:0010266(response to vitamin B1);GO:0016045(detection of bacterium);GO:0016830(carbon-carbon lyase activity);GO:0046872(metal ion binding);GO:0051536(iron-sulfur cluster binding);GO:0051539(4 iro…	00730(Thiamine metabolism)	K03147	EC:4.1.99.17	phosphomethylpyrimidine synthase, chloroplastic [Populus trichocarpa]	0.000644878	-10.5987	1.11993e-08	5.27925e-07	down	yes
Potri.001G249200.8	Potri.001G249200	GO:0003824(catalytic activity);GO:0009228(thiamine biosynthetic process);GO:0009229(thiamine diphosphate biosynthetic process);GO:0009507(chloroplast);GO:0009536(plastid);GO:0009570(chloroplast stroma);GO:0010266(response to vitamin B1);GO:0016045(detection of bacterium);GO:0016830(carbon-carbon lyase activity);GO:0046872(metal ion binding);GO:0051536(iron-sulfur cluster binding);GO:0051539(4 iro…	00730(Thiamine metabolism)	K03147	EC:4.1.99.17	phosphomethylpyrimidine synthase, chloroplastic [Populus trichocarpa]	1042.98	10.0265	5.60272e-08	2.25074e-06	up	Potri.001G249200	GO:0003824(catalytic activity);GO:0009228(thiamine biosynthetic process);GO:0009229(thiamine diphosphate biosynthetic process);GO:0009507(chloroplast);GO:0009536(plastid);GO:0009570(chloroplast stroma);GO:0010266(response to vitamin B1);GO:0016045(detection of bacterium);GO:0016830(carbon-carbon lyase activity);GO:0046872(metal ion binding);GO:0051536(iron-sulfur cluster binding);GO:0051539(4 iro…	00730(Thiamine metabolism)	K03147	EC:4.1.99.17	phosphomethylpyrimidine synthase, chloroplastic [Populus trichocarpa]	3488.76	11.7685	5.21326e-09	2.81909e-07	up	yes
Potri.001G251000.1	Potri.001G251000	GO:0000166(nucleotide binding);GO:0005515(protein binding);GO:0005634(nucleus);GO:0006281(DNA repair);GO:0008270(zinc ion binding);GO:0010224(response to UV-B);GO:0016567(protein ubiquitination);GO:0080008(Cul4-RING E3 ubiquitin ligase complex)	04120(Ubiquitin mediated proteolysis);03420(Nucleotide excision repair)	K10140	NA	protein DAMAGED DNA-BINDING 2 [Populus trichocarpa]	10.4481	3.38516	0.000195577	0.0047498	up	Potri.001G251000	GO:0000166(nucleotide binding);GO:0005515(protein binding);GO:0005634(nucleus);GO:0006281(DNA repair);GO:0008270(zinc ion binding);GO:0010224(response to UV-B);GO:0016567(protein ubiquitination);GO:0080008(Cul4-RING E3 ubiquitin ligase complex)	04120(Ubiquitin mediated proteolysis);03420(Nucleotide excision repair)	K10140	NA	protein DAMAGED DNA-BINDING 2 [Populus trichocarpa]	6.51359	2.70345	0.00534792	0.0629836	up	yes
Potri.001G253400.1	Potri.001G253400	GO:0003677(DNA binding);GO:0003682(chromatin binding);GO:0004386(helicase activity);GO:0005524(ATP binding);GO:0005634(nucleus);GO:0006333(chromatin assembly or disassembly);GO:0009506(plasmodesma)	NA	NA	NA	hypothetical protein POPTR_001G253400 [Populus trichocarpa]	16.04	4.0036	0.00953979	0.105306	up	Potri.001G253400	GO:0003677(DNA binding);GO:0003682(chromatin binding);GO:0004386(helicase activity);GO:0005524(ATP binding);GO:0005634(nucleus);GO:0006333(chromatin assembly or disassembly);GO:0009506(plasmodesma)	NA	NA	NA	hypothetical protein POPTR_001G253400 [Populus trichocarpa]	14.3223	3.84019	0.000497032	0.00923818	up	yes
Potri.001G255700.2	Potri.001G255700	NA	NA	NA	NA	uncharacterized protein LOC7478509 isoform X2 [Populus trichocarpa]	21.3121	4.4136	0.012978	0.130826	up	Potri.001G255700	NA	NA	NA	NA	uncharacterized protein LOC7478509 isoform X2 [Populus trichocarpa]	131.483	7.03874	0.000754689	0.013112	up	yes
Potri.001G255800.1	Potri.001G255800	GO:0005886(plasma membrane);GO:0016021(integral component of membrane);GO:0042626(ATPase activity, coupled to transmembrane movement of substances)	02010(ABC transporters)	K05681	NA	ABC transporter G family member 15 [Populus trichocarpa]	0.22087	-2.17873	0.00437279	0.0592109	down	Potri.001G255800	GO:0005886(plasma membrane);GO:0016021(integral component of membrane);GO:0042626(ATPase activity, coupled to transmembrane movement of substances)	02010(ABC transporters)	K05681	NA	ABC transporter G family member 15 [Populus trichocarpa]	0.301889	-1.72791	0.000385825	0.00743909	down	yes
Potri.001G259000.1	Potri.001G259000	GO:0002143(tRNA wobble position uridine thiolation)	NA	NA	NA	uncharacterized protein LOC7465154 [Populus trichocarpa]	0.0497818	-4.32824	0.000637764	0.0129489	down	Potri.001G259000	GO:0002143(tRNA wobble position uridine thiolation)	NA	NA	NA	uncharacterized protein LOC7465154 [Populus trichocarpa]	0.0348372	-4.84323	2.09759e-05	0.000548574	down	yes
Potri.001G264000.3	Potri.001G264000	GO:0000712(resolution of meiotic recombination intermediates);GO:0000819(sister chromatid segregation);GO:0003918(DNA topoisomerase type II (ATP-hydrolyzing) activity);GO:0005634(nucleus);GO:0006265(DNA topological change);GO:0006268(DNA unwinding involved in DNA replication);GO:0006312(mitotic recombination);GO:0009295(nucleoid);GO:0009330(DNA topoisomerase complex (ATP-hydrolyzing));GO:0044774(…	NA	NA	NA	PREDICTED: DNA topoisomerase 2-like isoform X1 [Populus euphratica]	33.2849	5.0568	0.00159155	0.0272447	up	Potri.001G264000	GO:0000712(resolution of meiotic recombination intermediates);GO:0000819(sister chromatid segregation);GO:0003918(DNA topoisomerase type II (ATP-hydrolyzing) activity);GO:0005634(nucleus);GO:0006265(DNA topological change);GO:0006268(DNA unwinding involved in DNA replication);GO:0006312(mitotic recombination);GO:0009295(nucleoid);GO:0009330(DNA topoisomerase complex (ATP-hydrolyzing));GO:0044774(…	NA	NA	NA	PREDICTED: DNA topoisomerase 2-like isoform X1 [Populus euphratica]	27.4389	4.77815	0.0119287	0.115204	up	yes
Potri.001G264100.2	Potri.001G264100	GO:0001708(cell fate specification);GO:0005515(protein binding);GO:0005634(nucleus);GO:0009880(embryonic pattern specification);GO:0046872(metal ion binding);GO:0090421(embryonic meristem initiation)	NA	NA	NA	PREDICTED: protein OBERON 4-like [Populus euphratica]	516.291	9.01204	0.000262781	0.00612138	up	Potri.001G264100	GO:0001708(cell fate specification);GO:0005515(protein binding);GO:0005634(nucleus);GO:0009880(embryonic pattern specification);GO:0046872(metal ion binding);GO:0090421(embryonic meristem initiation)	NA	NA	NA	PREDICTED: protein OBERON 4-like [Populus euphratica]	406.044	8.66549	9.6195e-06	0.000263973	up	yes
Potri.001G265200.2	Potri.001G265200	GO:0005200(structural constituent of cytoskeleton);GO:0005634(nucleus);GO:0005737(cytoplasm);GO:0006325(chromatin organization);GO:0009653(anatomical structure morphogenesis);GO:0009793(embryo development ending in seed dormancy);GO:0010227(floral organ abscission);GO:0016569(covalent chromatin modification)	NA	NA	NA	hypothetical protein POPTR_001G265200 [Populus trichocarpa]	96.9567	6.59927	0.0487302	0.309456	up	Potri.001G265200	GO:0005200(structural constituent of cytoskeleton);GO:0005634(nucleus);GO:0005737(cytoplasm);GO:0006325(chromatin organization);GO:0009653(anatomical structure morphogenesis);GO:0009793(embryo development ending in seed dormancy);GO:0010227(floral organ abscission);GO:0016569(covalent chromatin modification)	NA	NA	NA	hypothetical protein POPTR_001G265200 [Populus trichocarpa]	3892.67	11.9265	0.00141709	0.021874	up	yes
Potri.001G265900.1	Potri.001G265900	GO:0005737(cytoplasm);GO:0005773(vacuole);GO:0005774(vacuolar membrane);GO:0005794(Golgi apparatus);GO:0005886(plasma membrane);GO:0009414(response to water deprivation);GO:0009506(plasmodesma);GO:0016118(carotenoid catabolic process);GO:0016121(carotene catabolic process);GO:0016124(xanthophyll catabolic process);GO:0045549(9-cis-epoxycarotenoid dioxygenase activity);GO:0046872(metal ion binding…	NA	NA	NA	hypothetical protein POPTR_001G265900 [Populus trichocarpa]	0.0128748	-6.2793	1.48679e-139	3.41493e-135	down	Potri.001G265900	GO:0005737(cytoplasm);GO:0005773(vacuole);GO:0005774(vacuolar membrane);GO:0005794(Golgi apparatus);GO:0005886(plasma membrane);GO:0009414(response to water deprivation);GO:0009506(plasmodesma);GO:0016118(carotenoid catabolic process);GO:0016121(carotene catabolic process);GO:0016124(xanthophyll catabolic process);GO:0045549(9-cis-epoxycarotenoid dioxygenase activity);GO:0046872(metal ion binding…	NA	NA	NA	hypothetical protein POPTR_001G265900 [Populus trichocarpa]	0.0108581	-6.52508	2.05506e-08	8.74916e-07	down	yes
Potri.001G267200.2	Potri.001G267200	GO:0003674(molecular_function);GO:0005634(nucleus);GO:0008150(biological_process);GO:0016021(integral component of membrane)	NA	NA	NA	PREDICTED: uncharacterized protein LOC105141758 [Populus euphratica]	0.000528887	-10.8848	4.80956e-08	1.95692e-06	down	Potri.001G267200	GO:0003674(molecular_function);GO:0005634(nucleus);GO:0008150(biological_process);GO:0016021(integral component of membrane)	NA	NA	NA	PREDICTED: uncharacterized protein LOC105141758 [Populus euphratica]	0.000528887	-10.8848	2.39704e-08	9.98303e-07	down	yes
Potri.001G267700.2	Potri.001G267700	GO:0043161(proteasome-mediated ubiquitin-dependent protein catabolic process);GO:0048437(floral organ development);GO:0061630(ubiquitin protein ligase activity)	NA	NA	NA	E3 ubiquitin ligase BIG BROTHER [Populus trichocarpa]	2332.71	11.1878	1.14205e-07	4.2879e-06	up	Potri.001G267700	GO:0043161(proteasome-mediated ubiquitin-dependent protein catabolic process);GO:0048437(floral organ development);GO:0061630(ubiquitin protein ligase activity)	NA	NA	NA	E3 ubiquitin ligase BIG BROTHER [Populus trichocarpa]	4671.3	12.1896	0.00275553	0.0371259	up	yes
Potri.001G269000.1	Potri.001G269000	GO:0003674(molecular_function);GO:0005739(mitochondrion);GO:0008150(biological_process);GO:0016021(integral component of membrane)	NA	NA	NA	PREDICTED: uncharacterized protein LOC105126042 isoform X1 [Populus euphratica]	9.68231	3.27535	0.0328896	0.242512	up	Potri.001G269000	GO:0003674(molecular_function);GO:0005739(mitochondrion);GO:0008150(biological_process);GO:0016021(integral component of membrane)	NA	NA	NA	PREDICTED: uncharacterized protein LOC105126042 isoform X1 [Populus euphratica]	5.36692	2.42409	0.043595	0.28404	up	yes
Potri.001G271200.1	Potri.001G271200	GO:0000266(mitochondrial fission);GO:0000281(mitotic cytokinesis);GO:0005737(cytoplasm);GO:0008053(mitochondrial fusion);GO:0048312(intracellular distribution of mitochondria)	NA	NA	NA	PREDICTED: clustered mitochondria protein-like [Populus euphratica]	9.68185	3.27528	0.0126086	0.128156	up	Potri.001G271200	GO:0000266(mitochondrial fission);GO:0000281(mitotic cytokinesis);GO:0005737(cytoplasm);GO:0008053(mitochondrial fusion);GO:0048312(intracellular distribution of mitochondria)	NA	NA	NA	PREDICTED: clustered mitochondria protein-like [Populus euphratica]	9.04926	3.1778	0.0016902	0.0252155	up	yes
Potri.001G272000.1	Potri.001G272000	GO:0005515(protein binding);GO:0005634(nucleus);GO:0007049(cell cycle);GO:0016538(cyclin-dependent protein serine/threonine kinase regulator activity);GO:0051301(cell division);GO:0051726(regulation of cell cycle)	NA	NA	NA	G2/mitotic-specific cyclin S13-7 isoform X1 [Populus trichocarpa]	0.426949	-1.22786	0.0143934	0.14053	down	Potri.001G272000	GO:0005515(protein binding);GO:0005634(nucleus);GO:0007049(cell cycle);GO:0016538(cyclin-dependent protein serine/threonine kinase regulator activity);GO:0051301(cell division);GO:0051726(regulation of cell cycle)	NA	NA	NA	G2/mitotic-specific cyclin S13-7 isoform X1 [Populus trichocarpa]	0.481323	-1.05492	0.00395728	0.049641	down	yes
Potri.001G275200.1	Potri.001G275200	GO:0005737(cytoplasm);GO:0043087(regulation of GTPase activity)	NA	NA	NA	rho GTPase-activating protein 7 isoform X2 [Populus trichocarpa]	0.22516	-2.15098	0.00228605	0.0359184	down	Potri.001G275200	GO:0005737(cytoplasm);GO:0043087(regulation of GTPase activity)	NA	NA	NA	rho GTPase-activating protein 7 isoform X2 [Populus trichocarpa]	0.148065	-2.75569	0.000186201	0.00395814	down	yes
Potri.001G275400.2	Potri.001G275400	GO:0000184(nuclear-transcribed mRNA catabolic process, nonsense-mediated decay);GO:0000932(P-body);GO:0004540(ribonuclease activity);GO:0005515(protein binding);GO:0005634(nucleus);GO:0005697(telomerase holoenzyme complex);GO:0006406(mRNA export from nucleus);GO:0007004(telomere maintenance via telomerase);GO:0042162(telomeric DNA binding);GO:0043021(ribonucleoprotein complex binding);GO:0043487(…	03015(mRNA surveillance pathway)	K14409	NA	PREDICTED: protein SMG7 [Populus euphratica]	2.92739	1.54961	0.00753369	0.088703	up	Potri.001G275400	GO:0000184(nuclear-transcribed mRNA catabolic process, nonsense-mediated decay);GO:0000932(P-body);GO:0004540(ribonuclease activity);GO:0005515(protein binding);GO:0005634(nucleus);GO:0005697(telomerase holoenzyme complex);GO:0006406(mRNA export from nucleus);GO:0007004(telomere maintenance via telomerase);GO:0042162(telomeric DNA binding);GO:0043021(ribonucleoprotein complex binding);GO:0043487(…	03015(mRNA surveillance pathway)	K14409	NA	PREDICTED: protein SMG7 [Populus euphratica]	2.9448	1.55817	0.00571652	0.0662712	up	yes
Potri.001G276500.1	Potri.001G276500	GO:0005739(mitochondrion);GO:0009451(RNA modification)	NA	NA	NA	PREDICTED: pentatricopeptide repeat-containing protein At5g01110-like [Populus euphratica]	0.000793319	-10.2998	2.0063e-08	9.57163e-07	down	Potri.001G276500	GO:0005739(mitochondrion);GO:0009451(RNA modification)	NA	NA	NA	PREDICTED: pentatricopeptide repeat-containing protein At5g01110-like [Populus euphratica]	0.000793319	-10.2998	1.74736e-08	7.6012e-07	down	yes
Potri.001G276800.1	Potri.001G276800	NA	NA	NA	NA	uncharacterized protein LOC7496774 isoform X2 [Populus trichocarpa]	5.43547	2.44241	0.00158296	0.027133	up	Potri.001G276800	NA	NA	NA	NA	uncharacterized protein LOC7496774 isoform X2 [Populus trichocarpa]	7.4948	2.90589	0.01776	0.154574	up	yes
Potri.001G278800.2	Potri.001G278800	GO:0005198(structural molecule activity);GO:0005515(protein binding);GO:0005773(vacuole);GO:0005774(vacuolar membrane);GO:0005794(Golgi apparatus);GO:0005829(cytosol);GO:0005886(plasma membrane);GO:0006886(intracellular protein transport);GO:0006897(endocytosis);GO:0009506(plasmodesma);GO:0010118(stomatal movement);GO:0016192(vesicle-mediated transport);GO:0030130(clathrin coat of trans-Golgi net…	04144(Endocytosis)	K04646	NA	clathrin heavy chain 1 [Populus trichocarpa]	2.87215	1.52213	0.000460571	0.00987043	up	Potri.001G278800	GO:0005198(structural molecule activity);GO:0005515(protein binding);GO:0005773(vacuole);GO:0005774(vacuolar membrane);GO:0005794(Golgi apparatus);GO:0005829(cytosol);GO:0005886(plasma membrane);GO:0006886(intracellular protein transport);GO:0006897(endocytosis);GO:0009506(plasmodesma);GO:0010118(stomatal movement);GO:0016192(vesicle-mediated transport);GO:0030130(clathrin coat of trans-Golgi net…	04144(Endocytosis)	K04646	NA	clathrin heavy chain 1 [Populus trichocarpa]	2.7694	1.46958	0.00123819	0.0196119	up	yes
Potri.001G287400.3	Potri.001G287400	GO:0005737(cytoplasm);GO:0005777(peroxisome);GO:0006097(glyoxylate cycle);GO:0006099(tricarboxylic acid cycle);GO:0006108(malate metabolic process);GO:0009507(chloroplast);GO:0016615(malate dehydrogenase activity);GO:0030060(L-malate dehydrogenase activity);GO:0031998(regulation of fatty acid beta-oxidation);GO:0080093(regulation of photorespiration)	00020(Citrate cycle (TCA cycle));00620(Pyruvate metabolism);00630(Glyoxylate and dicarboxylate metabolism);00710(Carbon fixation in photosynthetic organisms);00270(Cysteine and methionine metabolism)	K00026	EC:1.1.1.37	malate dehydrogenase, glyoxysomal [Populus trichocarpa]	0.000518616	-10.913	0.0110648	0.117008	down	Potri.001G287400	GO:0005737(cytoplasm);GO:0005777(peroxisome);GO:0006097(glyoxylate cycle);GO:0006099(tricarboxylic acid cycle);GO:0006108(malate metabolic process);GO:0009507(chloroplast);GO:0016615(malate dehydrogenase activity);GO:0030060(L-malate dehydrogenase activity);GO:0031998(regulation of fatty acid beta-oxidation);GO:0080093(regulation of photorespiration)	00020(Citrate cycle (TCA cycle));00620(Pyruvate metabolism);00630(Glyoxylate and dicarboxylate metabolism);00710(Carbon fixation in photosynthetic organisms);00270(Cysteine and methionine metabolism)	K00026	EC:1.1.1.37	malate dehydrogenase, glyoxysomal [Populus trichocarpa]	0.000518616	-10.913	0.00917987	0.0946037	down	yes
Potri.001G287700.2	Potri.001G287700	GO:0016787(hydrolase activity)	00330(Arginine and proline metabolism)	K01259	EC:3.4.11.5	proline iminopeptidase [Populus trichocarpa]	7.172	2.84237	9.12816e-08	3.50017e-06	up	Potri.001G287700	GO:0016787(hydrolase activity)	00330(Arginine and proline metabolism)	K01259	EC:3.4.11.5	proline iminopeptidase [Populus trichocarpa]	3.64513	1.86597	0.000191542	0.00405851	up	yes
Potri.001G289200.4	Potri.001G289200	GO:0005634(nucleus);GO:0006281(DNA repair);GO:0016301(kinase activity)	04136(Autophagy - other eukaryotes)	K07203	EC:2.7.11.1	serine/threonine-protein kinase TOR isoform X1 [Populus trichocarpa]	0.0242572	-5.36544	0.000447098	0.00965828	down	Potri.001G289200	GO:0005634(nucleus);GO:0006281(DNA repair);GO:0016301(kinase activity)	04136(Autophagy - other eukaryotes)	K07203	EC:2.7.11.1	serine/threonine-protein kinase TOR isoform X1 [Populus trichocarpa]	0.083823	-3.57651	0.0257869	0.198887	down	yes
Potri.001G292100.2	Potri.001G292100	GO:0009690(cytokinin metabolic process)	NA	NA	NA	uncharacterized protein LOC7478665 isoform X3 [Populus trichocarpa]	0.000828418	-10.2374	0.000527179	0.0110429	down	Potri.001G292100	GO:0009690(cytokinin metabolic process)	NA	NA	NA	uncharacterized protein LOC7478665 isoform X3 [Populus trichocarpa]	0.000828418	-10.2374	0.000401264	0.00769546	down	yes
Potri.001G293000.1	Potri.001G293000	NA	NA	NA	NA	hypothetical protein POPTR_001G293000 [Populus trichocarpa]	2.64813	1.40497	0.026237	0.210083	up	Potri.001G293000	NA	NA	NA	NA	hypothetical protein POPTR_001G293000 [Populus trichocarpa]	3.18162	1.66976	0.0213581	0.175513	up	yes
Potri.001G294200.2	Potri.001G294200	GO:0008270(zinc ion binding);GO:0009737(response to abscisic acid);GO:0016021(integral component of membrane)	NA	NA	NA	zinc finger protein-like 1 homolog [Populus trichocarpa]	44.912	5.48903	8.57187e-14	3.50014e-11	up	Potri.001G294200	GO:0008270(zinc ion binding);GO:0009737(response to abscisic acid);GO:0016021(integral component of membrane)	NA	NA	NA	zinc finger protein-like 1 homolog [Populus trichocarpa]	40.5126	5.3403	0.000326121	0.00645039	up	yes
Potri.001G297200.2	Potri.001G297200	GO:0004722(protein serine/threonine phosphatase activity);GO:0006470(protein dephosphorylation);GO:0046872(metal ion binding)	NA	NA	NA	PREDICTED: probable protein phosphatase 2C 63 [Populus euphratica]	0.000391757	-11.3178	1.30884e-08	6.71651e-07	down	Potri.001G297200	GO:0004722(protein serine/threonine phosphatase activity);GO:0006470(protein dephosphorylation);GO:0046872(metal ion binding)	NA	NA	NA	PREDICTED: probable protein phosphatase 2C 63 [Populus euphratica]	0.000391757	-11.3178	1.1478e-08	5.39128e-07	down	yes
Potri.001G299000.1	Potri.001G299000	GO:0005576(extracellular region);GO:0008152(metabolic process);GO:0047513(1,2-alpha-L-fucosidase activity);GO:0048046(apoplast)	00511(Other glycan degradation)	K15923	EC:3.2.1.51	alpha-L-fucosidase 2 isoform X1 [Populus trichocarpa]	47.9479	5.5834	0.00556304	0.0710847	up	Potri.001G299000	GO:0005576(extracellular region);GO:0008152(metabolic process);GO:0047513(1,2-alpha-L-fucosidase activity);GO:0048046(apoplast)	00511(Other glycan degradation)	K15923	EC:3.2.1.51	alpha-L-fucosidase 2 isoform X1 [Populus trichocarpa]	94.5063	6.56234	0.00108625	0.0176073	up	yes
Potri.001G299000.7	Potri.001G299000	GO:0005576(extracellular region);GO:0008152(metabolic process);GO:0047513(1,2-alpha-L-fucosidase activity);GO:0048046(apoplast)	00511(Other glycan degradation)	K15923	EC:3.2.1.51	alpha-L-fucosidase 2 isoform X1 [Populus trichocarpa]	29.1726	4.86654	0.00754126	0.0887581	up	Potri.001G299000	GO:0005576(extracellular region);GO:0008152(metabolic process);GO:0047513(1,2-alpha-L-fucosidase activity);GO:0048046(apoplast)	00511(Other glycan degradation)	K15923	EC:3.2.1.51	alpha-L-fucosidase 2 isoform X1 [Populus trichocarpa]	23.4108	4.5491	0.00591306	0.0680176	up	yes
Potri.001G299400.1	Potri.001G299400	GO:0005576(extracellular region);GO:0006952(defense response)	NA	NA	NA	uncharacterized protein LOC18095185 [Populus trichocarpa]	0.0512006	-4.2877	0.0101445	0.110025	down	Potri.001G299400	GO:0005576(extracellular region);GO:0006952(defense response)	NA	NA	NA	uncharacterized protein LOC18095185 [Populus trichocarpa]	0.0468291	-4.41645	0.0066187	0.0741349	down	yes
Potri.001G302000.3	Potri.001G302000	GO:0004725(protein tyrosine phosphatase activity);GO:0005829(cytosol);GO:0006970(response to osmotic stress);GO:0008138(protein tyrosine/serine/threonine phosphatase activity);GO:0009651(response to salt stress);GO:0016314(phosphatidylinositol-3,4,5-trisphosphate 3-phosphatase activity);GO:0035335(peptidyl-tyrosine dephosphorylation);GO:0046856(phosphatidylinositol dephosphorylation);GO:0052866(p…	00562(Inositol phosphate metabolism);04070(Phosphatidylinositol signaling system)	K01110	EC:3.1.3.16;EC:3.1.3.48	hypothetical protein [Populus tomentosa]	0.0101299	-6.62523	0.00108289	0.0200261	down	Potri.001G302000	GO:0004725(protein tyrosine phosphatase activity);GO:0005829(cytosol);GO:0006970(response to osmotic stress);GO:0008138(protein tyrosine/serine/threonine phosphatase activity);GO:0009651(response to salt stress);GO:0016314(phosphatidylinositol-3,4,5-trisphosphate 3-phosphatase activity);GO:0035335(peptidyl-tyrosine dephosphorylation);GO:0046856(phosphatidylinositol dephosphorylation);GO:0052866(p…	00562(Inositol phosphate metabolism);04070(Phosphatidylinositol signaling system)	K01110	EC:3.1.3.16;EC:3.1.3.48	hypothetical protein [Populus tomentosa]	0.00881698	-6.8255	0.00192854	0.0280264	down	yes
Potri.001G302100.1	Potri.001G302100	GO:0004197(cysteine-type endopeptidase activity);GO:0005615(extracellular space);GO:0005764(lysosome);GO:0051603(proteolysis involved in cellular protein catabolic process)	04145(Phagosome)	K01365	EC:3.4.22.15	Response to dehydration 21A [Populus tomentosa]	2.01125	1.00809	0.0144035	0.140583	up	Potri.001G302100	GO:0004197(cysteine-type endopeptidase activity);GO:0005615(extracellular space);GO:0005764(lysosome);GO:0051603(proteolysis involved in cellular protein catabolic process)	04145(Phagosome)	K01365	EC:3.4.22.15	Response to dehydration 21A [Populus tomentosa]	2.30997	1.20787	0.00715188	0.0786913	up	yes
Potri.001G304100.1	Potri.001G304100	GO:0004842(ubiquitin-protein transferase activity);GO:0008270(zinc ion binding);GO:0008299(isoprenoid biosynthetic process);GO:0009414(response to water deprivation);GO:0010025(wax biosynthetic process);GO:0010143(cutin biosynthetic process);GO:0010345(suberin biosynthetic process);GO:0030176(integral component of endoplasmic reticulum membrane);GO:0030433(ubiquitin-dependent ERAD pathway);GO:004…	04141(Protein processing in endoplasmic reticulum)	K10661	EC:2.3.2.27	probable E3 ubiquitin ligase SUD1 isoform X1 [Populus trichocarpa]	0.17952	-2.47778	0.015932	0.150817	down	Potri.001G304100	GO:0004842(ubiquitin-protein transferase activity);GO:0008270(zinc ion binding);GO:0008299(isoprenoid biosynthetic process);GO:0009414(response to water deprivation);GO:0010025(wax biosynthetic process);GO:0010143(cutin biosynthetic process);GO:0010345(suberin biosynthetic process);GO:0030176(integral component of endoplasmic reticulum membrane);GO:0030433(ubiquitin-dependent ERAD pathway);GO:004…	04141(Protein processing in endoplasmic reticulum)	K10661	EC:2.3.2.27	probable E3 ubiquitin ligase SUD1 isoform X1 [Populus trichocarpa]	0.167512	-2.57766	0.0111004	0.109268	down	yes
Potri.001G309500.6	Potri.001G309500	GO:0005200(structural constituent of cytoskeleton);GO:0005515(protein binding);GO:0005524(ATP binding);GO:0005618(cell wall);GO:0005730(nucleolus);GO:0005737(cytoplasm);GO:0005739(mitochondrion);GO:0005829(cytosol);GO:0005856(cytoskeleton);GO:0005886(plasma membrane);GO:0007010(cytoskeleton organization);GO:0009416(response to light stimulus);GO:0009506(plasmodesma);GO:0009570(chloroplast stroma)…	NA	NA	NA	Actin 7 isoform 1 [Theobroma cacao]	0.000759749	-10.3622	4.38828e-08	1.81118e-06	down	Potri.001G309500	GO:0005200(structural constituent of cytoskeleton);GO:0005515(protein binding);GO:0005524(ATP binding);GO:0005618(cell wall);GO:0005730(nucleolus);GO:0005737(cytoplasm);GO:0005739(mitochondrion);GO:0005829(cytosol);GO:0005856(cytoskeleton);GO:0005886(plasma membrane);GO:0007010(cytoskeleton organization);GO:0009416(response to light stimulus);GO:0009506(plasmodesma);GO:0009570(chloroplast stroma)…	NA	NA	NA	Actin 7 isoform 1 [Theobroma cacao]	0.000759749	-10.3622	3.61196e-08	1.41753e-06	down	yes
Potri.001G314100.1	Potri.001G314100	GO:0005840(ribosome)	NA	NA	NA	PREDICTED: uncharacterized protein LOC105140501 [Populus euphratica]	1.14116e-05	-16.4191	2.63918e-24	4.0412e-21	down	Potri.001G314100	GO:0005840(ribosome)	NA	NA	NA	PREDICTED: uncharacterized protein LOC105140501 [Populus euphratica]	0.0024867	-8.65155	6.99707e-14	1.96041e-11	down	yes
Potri.001G314100.2	Potri.001G314100	GO:0005840(ribosome)	NA	NA	NA	PREDICTED: uncharacterized protein LOC105140501 [Populus euphratica]	4.05418	2.01941	1.48456e-06	5.08926e-05	up	Potri.001G314100	GO:0005840(ribosome)	NA	NA	NA	PREDICTED: uncharacterized protein LOC105140501 [Populus euphratica]	5.25091	2.39257	9.49201e-12	1.71667e-09	up	yes
Potri.001G318100.2	Potri.001G318100	GO:0003676(nucleic acid binding);GO:0003677(DNA binding);GO:0003917(DNA topoisomerase type I activity);GO:0005575(cellular_component);GO:0008270(zinc ion binding)	NA	NA	NA	cold shock domain-containing protein 3 [Populus trichocarpa]	26.9814	4.75389	0.0370665	0.261998	up	Potri.001G318100	GO:0003676(nucleic acid binding);GO:0003677(DNA binding);GO:0003917(DNA topoisomerase type I activity);GO:0005575(cellular_component);GO:0008270(zinc ion binding)	NA	NA	NA	cold shock domain-containing protein 3 [Populus trichocarpa]	49.042	5.61595	1.73559e-06	5.25735e-05	up	yes
Potri.001G322200.1	Potri.001G322200	GO:0003779(actin binding);GO:0005634(nucleus);GO:0005774(vacuolar membrane);GO:0005856(cytoskeleton);GO:0031965(nuclear membrane);GO:0051015(actin filament binding)	NA	NA	NA	protein NETWORKED 3C [Populus trichocarpa]	2.2505	1.17025	0.0430117	0.286747	up	Potri.001G322200	GO:0003779(actin binding);GO:0005634(nucleus);GO:0005774(vacuolar membrane);GO:0005856(cytoskeleton);GO:0031965(nuclear membrane);GO:0051015(actin filament binding)	NA	NA	NA	protein NETWORKED 3C [Populus trichocarpa]	2.18834	1.12983	0.043263	0.282498	up	yes
Potri.001G322700.1	Potri.001G322700	GO:0003677(DNA binding);GO:0003700(DNA binding transcription factor activity);GO:0005634(nucleus);GO:0006351(transcription, DNA-templated);GO:0006355(regulation of transcription, DNA-templated);GO:0008284(positive regulation of cell proliferation);GO:0009733(response to auxin);GO:0009793(embryo development ending in seed dormancy);GO:0010116(positive regulation of abscisic acid biosynthetic proce…	00600(Sphingolipid metabolism)	K00654	EC:2.3.1.50	B3 domain-containing transcription factor FUS3 isoform X1 [Populus trichocarpa]	674.42	9.3975	0.0481626	0.307199	up	Potri.001G322700	GO:0003677(DNA binding);GO:0003700(DNA binding transcription factor activity);GO:0005634(nucleus);GO:0006351(transcription, DNA-templated);GO:0006355(regulation of transcription, DNA-templated);GO:0008284(positive regulation of cell proliferation);GO:0009733(response to auxin);GO:0009793(embryo development ending in seed dormancy);GO:0010116(positive regulation of abscisic acid biosynthetic proce…	00600(Sphingolipid metabolism)	K00654	EC:2.3.1.50	B3 domain-containing transcription factor FUS3 isoform X1 [Populus trichocarpa]	637.753	9.31685	7.5405e-05	0.00178	up	yes
Potri.001G325600.1	Potri.001G325600	GO:0000145(exocyst);GO:0005515(protein binding);GO:0005634(nucleus);GO:0005829(cytosol);GO:0005886(plasma membrane);GO:0006887(exocytosis);GO:0006904(vesicle docking involved in exocytosis);GO:0080092(regulation of pollen tube growth);GO:0090406(pollen tube)	NA	NA	NA	exocyst complex component EXO70B1 [Populus trichocarpa]	0.162793	-2.61889	5.31927e-10	5.54714e-08	down	Potri.001G325600	GO:0000145(exocyst);GO:0005515(protein binding);GO:0005634(nucleus);GO:0005829(cytosol);GO:0005886(plasma membrane);GO:0006887(exocytosis);GO:0006904(vesicle docking involved in exocytosis);GO:0080092(regulation of pollen tube growth);GO:0090406(pollen tube)	NA	NA	NA	exocyst complex component EXO70B1 [Populus trichocarpa]	0.40427	-1.30661	0.0016744	0.0250422	down	yes
Potri.001G329100.2	Potri.001G329100	GO:0005886(plasma membrane);GO:0016021(integral component of membrane)	NA	NA	NA	protein NUCLEAR FUSION DEFECTIVE 4 [Populus trichocarpa]	0.258823	-1.94996	0.0141248	0.138658	down	Potri.001G329100	GO:0005886(plasma membrane);GO:0016021(integral component of membrane)	NA	NA	NA	protein NUCLEAR FUSION DEFECTIVE 4 [Populus trichocarpa]	0.255333	-1.96955	0.00805601	0.0859027	down	yes
Potri.001G336500.3	Potri.001G336500	GO:0003676(nucleic acid binding);GO:0008150(biological_process);GO:0008270(zinc ion binding);GO:0016021(integral component of membrane);GO:0043565(sequence-specific DNA binding)	NA	NA	NA	PREDICTED: uncharacterized protein LOC105140180 isoform X2 [Populus euphratica]	0.000521	-10.9064	3.40243e-08	1.47583e-06	down	Potri.001G336500	GO:0003676(nucleic acid binding);GO:0008150(biological_process);GO:0008270(zinc ion binding);GO:0016021(integral component of membrane);GO:0043565(sequence-specific DNA binding)	NA	NA	NA	PREDICTED: uncharacterized protein LOC105140180 isoform X2 [Populus euphratica]	0.000521	-10.9064	2.98736e-08	1.20748e-06	down	yes
Potri.001G337400.6	Potri.001G337400	GO:0004345(glucose-6-phosphate dehydrogenase activity);GO:0005737(cytoplasm);GO:0005829(cytosol);GO:0006006(glucose metabolic process);GO:0009051(pentose-phosphate shunt, oxidative branch);GO:0050661(NADP binding);GO:0055114(oxidation-reduction process)	00030(Pentose phosphate pathway);00480(Glutathione metabolism)	K00036	EC:1.1.1.49;EC:1.1.1.363	glucose-6-phosphate dehydrogenase [Populus suaveolens]	16985.3	14.052	4.45846e-10	4.841e-08	up	Potri.001G337400	GO:0004345(glucose-6-phosphate dehydrogenase activity);GO:0005737(cytoplasm);GO:0005829(cytosol);GO:0006006(glucose metabolic process);GO:0009051(pentose-phosphate shunt, oxidative branch);GO:0050661(NADP binding);GO:0055114(oxidation-reduction process)	00030(Pentose phosphate pathway);00480(Glutathione metabolism)	K00036	EC:1.1.1.49;EC:1.1.1.363	glucose-6-phosphate dehydrogenase [Populus suaveolens]	9933.52	13.2781	1.27199e-09	9.28957e-08	up	yes
Potri.001G340300.1	Potri.001G340300	GO:0005634(nucleus);GO:0010088(phloem development);GO:0042803(protein homodimerization activity);GO:0043621(protein self-association)	NA	NA	NA	protein SIEVE ELEMENT OCCLUSION B [Populus trichocarpa]	5.08561	2.34642	0.0377204	0.264342	up	Potri.001G340300	GO:0005634(nucleus);GO:0010088(phloem development);GO:0042803(protein homodimerization activity);GO:0043621(protein self-association)	NA	NA	NA	protein SIEVE ELEMENT OCCLUSION B [Populus trichocarpa]	3.78936	1.92195	0.00543854	0.0636956	up	yes
Potri.001G340500.1	Potri.001G340500	GO:0005634(nucleus);GO:0010088(phloem development);GO:0042803(protein homodimerization activity);GO:0043621(protein self-association)	NA	NA	NA	protein SIEVE ELEMENT OCCLUSION B [Populus trichocarpa]	2.43003	1.28097	0.00104438	0.0194346	up	Potri.001G340500	GO:0005634(nucleus);GO:0010088(phloem development);GO:0042803(protein homodimerization activity);GO:0043621(protein self-association)	NA	NA	NA	protein SIEVE ELEMENT OCCLUSION B [Populus trichocarpa]	2.0968	1.06819	0.0142811	0.131535	up	yes
Potri.001G345100.3	Potri.001G345100	GO:0005643(nuclear pore)	03013(RNA transport)	K14314	NA	nuclear pore complex protein GP210 [Populus trichocarpa]	0.143786	-2.79801	0.0336622	0.246135	down	Potri.001G345100	GO:0005643(nuclear pore)	03013(RNA transport)	K14314	NA	nuclear pore complex protein GP210 [Populus trichocarpa]	0.0544354	-4.19931	0.000243344	0.00500828	down	yes
Potri.001G345300.7	Potri.001G345300	NA	NA	NA	NA	hypothetical protein POPTR_001G345300 [Populus trichocarpa]	5.22521	2.38549	0.0343951	0.249616	up	Potri.001G345300	NA	NA	NA	NA	hypothetical protein POPTR_001G345300 [Populus trichocarpa]	5.1867	2.37482	0.0307724	0.225512	up	yes
Potri.001G346000.2	Potri.001G346000	GO:0005886(plasma membrane);GO:0006629(lipid metabolic process);GO:0006723(cuticle hydrocarbon biosynthetic process);GO:0006952(defense response);GO:0009507(chloroplast);GO:0009793(embryo development ending in seed dormancy);GO:0016021(integral component of membrane);GO:0043447(alkane biosynthetic process);GO:0048316(seed development)	NA	NA	NA	hypothetical protein POPTR_001G346000 [Populus trichocarpa]	4529.55	12.1452	6.40285e-10	6.45725e-08	up	Potri.001G346000	GO:0005886(plasma membrane);GO:0006629(lipid metabolic process);GO:0006723(cuticle hydrocarbon biosynthetic process);GO:0006952(defense response);GO:0009507(chloroplast);GO:0009793(embryo development ending in seed dormancy);GO:0016021(integral component of membrane);GO:0043447(alkane biosynthetic process);GO:0048316(seed development)	NA	NA	NA	hypothetical protein POPTR_001G346000 [Populus trichocarpa]	495.187	8.95183	7.51928e-08	2.71765e-06	up	yes
Potri.001G348300.2	Potri.001G348300	GO:0005886(plasma membrane);GO:0009705(plant-type vacuole membrane);GO:0015112(nitrate transmembrane transporter activity);GO:0015706(nitrate transport);GO:0016021(integral component of membrane);GO:0042128(nitrate assimilation);GO:0055085(transmembrane transport);GO:0071249(cellular response to nitrate)	00910(Nitrogen metabolism)	K02575	NA	high affinity nitrate transporter 2.7 [Populus trichocarpa]	197.49	7.62564	0.0096735	0.106391	up	Potri.001G348300	GO:0005886(plasma membrane);GO:0009705(plant-type vacuole membrane);GO:0015112(nitrate transmembrane transporter activity);GO:0015706(nitrate transport);GO:0016021(integral component of membrane);GO:0042128(nitrate assimilation);GO:0055085(transmembrane transport);GO:0071249(cellular response to nitrate)	00910(Nitrogen metabolism)	K02575	NA	high affinity nitrate transporter 2.7 [Populus trichocarpa]	402.734	8.65368	0.00294949	0.0392499	up	yes
Potri.001G348700.4	Potri.001G348700	GO:0005634(nucleus);GO:0008308(voltage-gated anion channel activity);GO:0031307(integral component of mitochondrial outer membrane);GO:1900057(positive regulation of leaf senescence)	NA	NA	NA	uncharacterized protein LOC7487857 [Populus trichocarpa]	2.36448	1.24152	0.017575	0.160743	up	Potri.001G348700	GO:0005634(nucleus);GO:0008308(voltage-gated anion channel activity);GO:0031307(integral component of mitochondrial outer membrane);GO:1900057(positive regulation of leaf senescence)	NA	NA	NA	uncharacterized protein LOC7487857 [Populus trichocarpa]	2.83072	1.50117	3.25724e-05	0.000828275	up	yes
Potri.001G348800.2	Potri.001G348800	GO:0004252(serine-type endopeptidase activity);GO:0005515(protein binding);GO:0005634(nucleus);GO:0005739(mitochondrion);GO:0006508(proteolysis);GO:0008236(serine-type peptidase activity);GO:0009507(chloroplast);GO:0009534(chloroplast thylakoid);GO:0009535(chloroplast thylakoid membrane);GO:0009543(chloroplast thylakoid lumen);GO:0009579(thylakoid);GO:0009735(response to cytokinin);GO:0010206(pho…	NA	NA	NA	protease Do-like 1, chloroplastic [Populus trichocarpa]	0.0928402	-3.42911	0.0118435	0.122494	down	Potri.001G348800	GO:0004252(serine-type endopeptidase activity);GO:0005515(protein binding);GO:0005634(nucleus);GO:0005739(mitochondrion);GO:0006508(proteolysis);GO:0008236(serine-type peptidase activity);GO:0009507(chloroplast);GO:0009534(chloroplast thylakoid);GO:0009535(chloroplast thylakoid membrane);GO:0009543(chloroplast thylakoid lumen);GO:0009579(thylakoid);GO:0009735(response to cytokinin);GO:0010206(pho…	NA	NA	NA	protease Do-like 1, chloroplastic [Populus trichocarpa]	0.0979688	-3.35153	0.0111844	0.109852	down	yes
Potri.001G349800.3	Potri.001G349800	GO:0008168(methyltransferase activity);GO:0032259(methylation)	NA	NA	NA	uncharacterized protein LOC7496823 isoform X2 [Populus trichocarpa]	221.74	7.79272	0.00146928	0.0255709	up	Potri.001G349800	GO:0008168(methyltransferase activity);GO:0032259(methylation)	NA	NA	NA	uncharacterized protein LOC7496823 isoform X2 [Populus trichocarpa]	74.2723	6.21475	0.0103092	0.103529	up	yes
Potri.001G350200.4	Potri.001G350200	GO:0000118(histone deacetylase complex);GO:0000122(negative regulation of transcription by RNA polymerase II);GO:0000785(chromatin);GO:0004407(histone deacetylase activity);GO:0016575(histone deacetylation)	NA	NA	NA	paired amphipathic helix protein Sin3-like 2 isoform X2 [Populus trichocarpa]	0.000173831	-12.49	3.32716e-18	2.34096e-15	down	Potri.001G350200	GO:0000118(histone deacetylase complex);GO:0000122(negative regulation of transcription by RNA polymerase II);GO:0000785(chromatin);GO:0004407(histone deacetylase activity);GO:0016575(histone deacetylation)	NA	NA	NA	paired amphipathic helix protein Sin3-like 2 isoform X2 [Populus trichocarpa]	0.000173831	-12.49	1.64594e-18	8.21843e-16	down	yes
Potri.001G350400.1	Potri.001G350400	GO:0000139(Golgi membrane);GO:0004559(alpha-mannosidase activity);GO:0006013(mannose metabolic process);GO:0006491(N-glycan processing);GO:0006517(protein deglycosylation)	00510(N-Glycan biosynthesis)	K01231	EC:3.2.1.114	alpha-mannosidase 2 [Populus trichocarpa]	3.19599	1.67626	1.53913e-05	0.000474357	up	Potri.001G350400	GO:0000139(Golgi membrane);GO:0004559(alpha-mannosidase activity);GO:0006013(mannose metabolic process);GO:0006491(N-glycan processing);GO:0006517(protein deglycosylation)	00510(N-Glycan biosynthesis)	K01231	EC:3.2.1.114	alpha-mannosidase 2 [Populus trichocarpa]	9.83769	3.29832	0.0288006	0.214845	up	yes
Potri.001G350600.2	Potri.001G350600	GO:0005515(protein binding);GO:0005576(extracellular region);GO:0005886(plasma membrane);GO:0009651(response to salt stress);GO:0009737(response to abscisic acid);GO:0009739(response to gibberellin);GO:0009740(gibberellic acid mediated signaling pathway);GO:2000377(regulation of reactive oxygen species metabolic process)	NA	NA	NA	PREDICTED: gibberellin-regulated protein 14-like [Populus euphratica]	8.61997	3.10768	0.0183747	0.165717	up	Potri.001G350600	GO:0005515(protein binding);GO:0005576(extracellular region);GO:0005886(plasma membrane);GO:0009651(response to salt stress);GO:0009737(response to abscisic acid);GO:0009739(response to gibberellin);GO:0009740(gibberellic acid mediated signaling pathway);GO:2000377(regulation of reactive oxygen species metabolic process)	NA	NA	NA	PREDICTED: gibberellin-regulated protein 14-like [Populus euphratica]	8.82882	3.14222	0.0287002	0.214341	up	yes
Potri.001G353100.2	Potri.001G353100	GO:0003729(mRNA binding);GO:0005634(nucleus)	NA	NA	NA	kinase-related protein DUF1296 [Populus tomentosa]	3364.06	11.716	0.00107421	0.0198816	up	Potri.001G353100	GO:0003729(mRNA binding);GO:0005634(nucleus)	NA	NA	NA	kinase-related protein DUF1296 [Populus tomentosa]	2229.54	11.1225	1.59393e-08	7.04718e-07	up	yes
Potri.001G353700.3	Potri.001G353700	GO:0004721(phosphoprotein phosphatase activity)	NA	NA	NA	uncharacterized protein LOC18095283 isoform X1 [Populus trichocarpa]	0.000440732	-11.1478	8.39561e-09	4.73795e-07	down	Potri.001G353700	GO:0004721(phosphoprotein phosphatase activity)	NA	NA	NA	uncharacterized protein LOC18095283 isoform X1 [Populus trichocarpa]	0.000440732	-11.1478	7.29002e-09	3.70854e-07	down	yes
Potri.001G355600.1	Potri.001G355600	GO:0005737(cytoplasm);GO:0006006(glucose metabolic process);GO:0080048(GDP-D-glucose phosphorylase activity)	00053(Ascorbate and aldarate metabolism)	K14190	EC:2.7.7.69	unknown [Populus trichocarpa]	51.9419	5.69883	0.0071441	0.0852301	up	Potri.001G355600	GO:0005737(cytoplasm);GO:0006006(glucose metabolic process);GO:0080048(GDP-D-glucose phosphorylase activity)	00053(Ascorbate and aldarate metabolism)	K14190	EC:2.7.7.69	unknown [Populus trichocarpa]	48.1473	5.58938	0.000758619	0.0131678	up	yes
Potri.001G359600.2	Potri.001G359600	GO:0016020(membrane);GO:0046961(proton-transporting ATPase activity, rotational mechanism)	00190(Oxidative phosphorylation);04145(Phagosome)	K02153	NA	PREDICTED: V-type proton ATPase subunit e1 [Populus euphratica]	0.0260371	-5.26329	0.000329908	0.00743619	down	Potri.001G359600	GO:0016020(membrane);GO:0046961(proton-transporting ATPase activity, rotational mechanism)	00190(Oxidative phosphorylation);04145(Phagosome)	K02153	NA	PREDICTED: V-type proton ATPase subunit e1 [Populus euphratica]	0.0224452	-5.47745	7.50638e-05	0.0017724	down	yes
Potri.001G360300.1	Potri.001G360300	GO:0009941(chloroplast envelope);GO:0033365(protein localization to organelle)	NA	NA	NA	mitochondrial import inner membrane translocase subunit TIM22-3 isoform X1 [Populus trichocarpa]	5.06269	2.3399	1.12249e-07	4.22135e-06	up	Potri.001G360300	GO:0009941(chloroplast envelope);GO:0033365(protein localization to organelle)	NA	NA	NA	mitochondrial import inner membrane translocase subunit TIM22-3 isoform X1 [Populus trichocarpa]	2.21846	1.14956	0.0299656	0.221149	up	yes
Potri.001G361800.4	Potri.001G361800	GO:0003690(double-stranded DNA binding);GO:0003727(single-stranded RNA binding);GO:0005739(mitochondrion);GO:0006353(DNA-templated transcription, termination);GO:0006355(regulation of transcription, DNA-templated);GO:0008380(RNA splicing);GO:0009507(chloroplast);GO:0009651(response to salt stress);GO:0009658(chloroplast organization);GO:0019843(rRNA binding);GO:0032502(developmental process);GO:0…	NA	NA	NA	hypothetical protein POPTR_001G361800 [Populus trichocarpa]	3.9111	1.96757	0.0118615	0.122567	up	Potri.001G361800	GO:0003690(double-stranded DNA binding);GO:0003727(single-stranded RNA binding);GO:0005739(mitochondrion);GO:0006353(DNA-templated transcription, termination);GO:0006355(regulation of transcription, DNA-templated);GO:0008380(RNA splicing);GO:0009507(chloroplast);GO:0009651(response to salt stress);GO:0009658(chloroplast organization);GO:0019843(rRNA binding);GO:0032502(developmental process);GO:0…	NA	NA	NA	hypothetical protein POPTR_001G361800 [Populus trichocarpa]	5.66626	2.5024	0.00404075	0.0505569	up	yes
Potri.001G361800.6	Potri.001G361800	GO:0003690(double-stranded DNA binding);GO:0003727(single-stranded RNA binding);GO:0005739(mitochondrion);GO:0006353(DNA-templated transcription, termination);GO:0006355(regulation of transcription, DNA-templated);GO:0008380(RNA splicing);GO:0009507(chloroplast);GO:0009651(response to salt stress);GO:0009658(chloroplast organization);GO:0019843(rRNA binding);GO:0032502(developmental process);GO:0…	NA	NA	NA	hypothetical protein POPTR_001G361800 [Populus trichocarpa]	0.000985024	-9.98755	0.0168161	0.15623	down	Potri.001G361800	GO:0003690(double-stranded DNA binding);GO:0003727(single-stranded RNA binding);GO:0005739(mitochondrion);GO:0006353(DNA-templated transcription, termination);GO:0006355(regulation of transcription, DNA-templated);GO:0008380(RNA splicing);GO:0009507(chloroplast);GO:0009651(response to salt stress);GO:0009658(chloroplast organization);GO:0019843(rRNA binding);GO:0032502(developmental process);GO:0…	NA	NA	NA	hypothetical protein POPTR_001G361800 [Populus trichocarpa]	0.000985024	-9.98755	0.0139826	0.129487	down	yes
Potri.001G361800.7	Potri.001G361800	GO:0003690(double-stranded DNA binding);GO:0003727(single-stranded RNA binding);GO:0005739(mitochondrion);GO:0006353(DNA-templated transcription, termination);GO:0006355(regulation of transcription, DNA-templated);GO:0008380(RNA splicing);GO:0009507(chloroplast);GO:0009651(response to salt stress);GO:0009658(chloroplast organization);GO:0019843(rRNA binding);GO:0032502(developmental process);GO:0…	NA	NA	NA	hypothetical protein POPTR_001G361800 [Populus trichocarpa]	2.97231	1.57158	3.69692e-05	0.00107179	up	Potri.001G361800	GO:0003690(double-stranded DNA binding);GO:0003727(single-stranded RNA binding);GO:0005739(mitochondrion);GO:0006353(DNA-templated transcription, termination);GO:0006355(regulation of transcription, DNA-templated);GO:0008380(RNA splicing);GO:0009507(chloroplast);GO:0009651(response to salt stress);GO:0009658(chloroplast organization);GO:0019843(rRNA binding);GO:0032502(developmental process);GO:0…	NA	NA	NA	hypothetical protein POPTR_001G361800 [Populus trichocarpa]	2.21335	1.14623	0.0193867	0.164221	up	yes
Potri.001G368000.13	Potri.001G368000	GO:0000210(NAD+ diphosphatase activity);GO:0005829(cytosol);GO:0006979(response to oxidative stress);GO:0016787(hydrolase activity);GO:0046872(metal ion binding);GO:0047631(ADP-ribose diphosphatase activity);GO:0051287(NAD binding)	NA	NA	NA	nudix hydrolase 10 [Populus trichocarpa]	3912.48	11.9339	0.00195609	0.0319549	up	Potri.001G368000	GO:0000210(NAD+ diphosphatase activity);GO:0005829(cytosol);GO:0006979(response to oxidative stress);GO:0016787(hydrolase activity);GO:0046872(metal ion binding);GO:0047631(ADP-ribose diphosphatase activity);GO:0051287(NAD binding)	NA	NA	NA	nudix hydrolase 10 [Populus trichocarpa]	2118.12	11.0486	6.76014e-08	2.46168e-06	up	yes
Potri.001G369100.2	Potri.001G369100	GO:0000139(Golgi membrane);GO:0000271(polysaccharide biosynthetic process);GO:0000977(RNA polymerase II regulatory region sequence-specific DNA binding);GO:0005783(endoplasmic reticulum);GO:0005794(Golgi apparatus);GO:0005886(plasma membrane);GO:0009832(plant-type cell wall biogenesis);GO:0009833(plant-type primary cell wall biogenesis);GO:0016021(integral component of membrane);GO:0016757(transf…	NA	NA	NA	cellulose synthase-like protein [Populus tomentosa]	0.286262	-1.80459	0.0138813	0.136989	down	Potri.001G369100	GO:0000139(Golgi membrane);GO:0000271(polysaccharide biosynthetic process);GO:0000977(RNA polymerase II regulatory region sequence-specific DNA binding);GO:0005783(endoplasmic reticulum);GO:0005794(Golgi apparatus);GO:0005886(plasma membrane);GO:0009832(plant-type cell wall biogenesis);GO:0009833(plant-type primary cell wall biogenesis);GO:0016021(integral component of membrane);GO:0016757(transf…	NA	NA	NA	cellulose synthase-like protein [Populus tomentosa]	0.336021	-1.57338	0.0317231	0.230143	down	yes
Potri.001G370200.2	Potri.001G370200	GO:0003674(molecular_function);GO:0005783(endoplasmic reticulum);GO:0009793(embryo development ending in seed dormancy);GO:0072546(ER membrane protein complex)	NA	NA	NA	ER membrane protein complex subunit 8/9 homolog isoform X1 [Populus trichocarpa]	0.28282	-1.82204	0.00500231	0.0656359	down	Potri.001G370200	GO:0003674(molecular_function);GO:0005783(endoplasmic reticulum);GO:0009793(embryo development ending in seed dormancy);GO:0072546(ER membrane protein complex)	NA	NA	NA	ER membrane protein complex subunit 8/9 homolog isoform X1 [Populus trichocarpa]	0.289802	-1.78686	0.0129386	0.122296	down	yes
Potri.001G370400.2	Potri.001G370400	GO:0000398(mRNA splicing, via spliceosome);GO:0003674(molecular_function);GO:0003723(RNA binding);GO:0005634(nucleus);GO:0005681(spliceosomal complex)	03040(Spliceosome)	K12863	NA	hypothetical protein POPTR_001G370400 [Populus trichocarpa]	0.000200947	-12.2809	6.1166e-09	3.70196e-07	down	Potri.001G370400	GO:0000398(mRNA splicing, via spliceosome);GO:0003674(molecular_function);GO:0003723(RNA binding);GO:0005634(nucleus);GO:0005681(spliceosomal complex)	03040(Spliceosome)	K12863	NA	hypothetical protein POPTR_001G370400 [Populus trichocarpa]	0.000200947	-12.2809	5.28416e-09	2.8457e-07	down	yes
Potri.001G372800.1	Potri.001G372800	GO:0003674(molecular_function);GO:0005634(nucleus);GO:0008150(biological_process)	NA	NA	NA	uncharacterized protein LOC7487571 [Populus trichocarpa]	2412.22	11.2361	2.96193e-14	1.31461e-11	up	Potri.001G372800	GO:0003674(molecular_function);GO:0005634(nucleus);GO:0008150(biological_process)	NA	NA	NA	uncharacterized protein LOC7487571 [Populus trichocarpa]	4757.6	12.216	1.72402e-26	1.84177e-23	up	yes
Potri.001G373700.3	Potri.001G373700	GO:0043161(proteasome-mediated ubiquitin-dependent protein catabolic process);GO:0061630(ubiquitin protein ligase activity);GO:0005515(protein binding);GO:0005634(nucleus);GO:0008270(zinc ion binding);GO:0016567(protein ubiquitination);GO:0060776(simple leaf morphogenesis)	NA	NA	NA	probable E3 ubiquitin-protein ligase ZFP1 [Populus trichocarpa]	0.318533	-1.65048	0.00418772	0.0572703	down	Potri.001G373700	GO:0043161(proteasome-mediated ubiquitin-dependent protein catabolic process);GO:0061630(ubiquitin protein ligase activity);GO:0005515(protein binding);GO:0005634(nucleus);GO:0008270(zinc ion binding);GO:0016567(protein ubiquitination);GO:0060776(simple leaf morphogenesis)	NA	NA	NA	probable E3 ubiquitin-protein ligase ZFP1 [Populus trichocarpa]	2.21352	1.14634	0.0157316	0.141435	up	yes
Potri.001G373700.4	Potri.001G373700	GO:0043161(proteasome-mediated ubiquitin-dependent protein catabolic process);GO:0061630(ubiquitin protein ligase activity);GO:0005515(protein binding);GO:0005634(nucleus);GO:0008270(zinc ion binding);GO:0016567(protein ubiquitination);GO:0060776(simple leaf morphogenesis)	NA	NA	NA	probable E3 ubiquitin-protein ligase ZFP1 [Populus trichocarpa]	0.0124788	-6.32438	0.000587195	0.0121068	down	Potri.001G373700	GO:0043161(proteasome-mediated ubiquitin-dependent protein catabolic process);GO:0061630(ubiquitin protein ligase activity);GO:0005515(protein binding);GO:0005634(nucleus);GO:0008270(zinc ion binding);GO:0016567(protein ubiquitination);GO:0060776(simple leaf morphogenesis)	NA	NA	NA	probable E3 ubiquitin-protein ligase ZFP1 [Populus trichocarpa]	0.0171607	-5.86475	0.00136283	0.0211573	down	yes
Potri.001G377800.2	Potri.001G377800	GO:0003674(molecular_function);GO:0005634(nucleus);GO:0008380(RNA splicing)	00970(Aminoacyl-tRNA biosynthesis)	K01867	EC:6.1.1.2	hypothetical protein POPTR_001G377800 [Populus trichocarpa]	0.320555	-1.64136	0.0132349	0.132673	down	Potri.001G377800	GO:0003674(molecular_function);GO:0005634(nucleus);GO:0008380(RNA splicing)	00970(Aminoacyl-tRNA biosynthesis)	K01867	EC:6.1.1.2	hypothetical protein POPTR_001G377800 [Populus trichocarpa]	0.373216	-1.42192	0.0116172	0.113015	down	yes
Potri.001G380400.1	Potri.001G380400	GO:0004252(serine-type endopeptidase activity);GO:0006465(signal peptide processing);GO:0006627(protein processing involved in protein targeting to mitochondrion);GO:0033108(mitochondrial respiratory chain complex assembly);GO:0042720(mitochondrial inner membrane peptidase complex)	03060(Protein export)	K09647	EC:3.4.21.-	mitochondrial inner membrane protease subunit 1 isoform X1 [Populus trichocarpa]	0.000742537	-10.3952	0.0357448	0.256071	down	Potri.001G380400	GO:0004252(serine-type endopeptidase activity);GO:0006465(signal peptide processing);GO:0006627(protein processing involved in protein targeting to mitochondrion);GO:0033108(mitochondrial respiratory chain complex assembly);GO:0042720(mitochondrial inner membrane peptidase complex)	03060(Protein export)	K09647	EC:3.4.21.-	mitochondrial inner membrane protease subunit 1 isoform X1 [Populus trichocarpa]	0.000742537	-10.3952	0.030801	0.225645	down	yes
Potri.001G383000.1	Potri.001G383000	GO:0008643(carbohydrate transport);GO:0016021(integral component of membrane);GO:0051119(sugar transmembrane transporter activity)	NA	NA	NA	PREDICTED: bidirectional sugar transporter SWEET2 [Populus euphratica]	27.8896	4.80166	0.00872391	0.0986462	up	Potri.001G383000	GO:0008643(carbohydrate transport);GO:0016021(integral component of membrane);GO:0051119(sugar transmembrane transporter activity)	NA	NA	NA	PREDICTED: bidirectional sugar transporter SWEET2 [Populus euphratica]	15.5653	3.96026	0.0262487	0.201334	up	yes
Potri.001G383500.2	Potri.001G383500	GO:0003824(catalytic activity);GO:0005829(cytosol);GO:0008460(dTDP-glucose 4,6-dehydratase activity);GO:0009225(nucleotide-sugar metabolic process);GO:0009506(plasmodesma);GO:0009507(chloroplast);GO:0010253(UDP-rhamnose biosynthetic process);GO:0010280(UDP-L-rhamnose synthase activity);GO:0010315(auxin efflux);GO:0016491(oxidoreductase activity);GO:0016853(isomerase activity);GO:0030154(cell diff…	00520(Amino sugar and nucleotide sugar metabolism)	K12450	EC:4.2.1.76	trifunctional UDP-glucose 4,6-dehydratase/UDP-4-keto-6-deoxy-D-glucose 3,5-epimerase/UDP-4-keto-L-rhamnose-reductase RHM1 [Populus trichocarpa]	18.0181	4.17137	1.62297e-11	3.32069e-09	up	Potri.001G383500	GO:0003824(catalytic activity);GO:0005829(cytosol);GO:0008460(dTDP-glucose 4,6-dehydratase activity);GO:0009225(nucleotide-sugar metabolic process);GO:0009506(plasmodesma);GO:0009507(chloroplast);GO:0010253(UDP-rhamnose biosynthetic process);GO:0010280(UDP-L-rhamnose synthase activity);GO:0010315(auxin efflux);GO:0016491(oxidoreductase activity);GO:0016853(isomerase activity);GO:0030154(cell diff…	00520(Amino sugar and nucleotide sugar metabolism)	K12450	EC:4.2.1.76	trifunctional UDP-glucose 4,6-dehydratase/UDP-4-keto-6-deoxy-D-glucose 3,5-epimerase/UDP-4-keto-L-rhamnose-reductase RHM1 [Populus trichocarpa]	18.1884	4.18494	2.63508e-18	1.25438e-15	up	yes
Potri.001G385900.1	Potri.001G385900	GO:0004674(protein serine/threonine kinase activity);GO:0005886(plasma membrane)	NA	NA	NA	hypothetical protein POPTR_003G025800 [Populus trichocarpa]	4.26206	2.09155	0.0319817	0.238487	up	Potri.001G385900	GO:0004674(protein serine/threonine kinase activity);GO:0005886(plasma membrane)	NA	NA	NA	hypothetical protein POPTR_003G025800 [Populus trichocarpa]	8.92975	3.15862	0.00543452	0.0636626	up	yes
Potri.001G386700.1	Potri.001G386700	GO:0003674(molecular_function);GO:0005739(mitochondrion);GO:0008150(biological_process)	00790(Folate biosynthesis)	K13941	EC:2.7.6.3;EC:2.5.1.15	uncharacterized protein LOC18095444 [Populus trichocarpa]	2.85661	1.5143	0.00158919	0.0272195	up	Potri.001G386700	GO:0003674(molecular_function);GO:0005739(mitochondrion);GO:0008150(biological_process)	00790(Folate biosynthesis)	K13941	EC:2.7.6.3;EC:2.5.1.15	uncharacterized protein LOC18095444 [Populus trichocarpa]	2.47099	1.30509	0.0095351	0.0974338	up	yes
Potri.001G386900.2	Potri.001G386900	GO:0003677(DNA binding);GO:0003700(DNA binding transcription factor activity);GO:0005634(nucleus);GO:0006351(transcription, DNA-templated);GO:0006355(regulation of transcription, DNA-templated);GO:0009742(brassinosteroid mediated signaling pathway)	04075(Plant hormone signal transduction)	K14503	NA	BES1/BZR1 homolog protein 4 isoform X1 [Populus trichocarpa]	0.214916	-2.21815	0.0189888	0.169492	down	Potri.001G386900	GO:0003677(DNA binding);GO:0003700(DNA binding transcription factor activity);GO:0005634(nucleus);GO:0006351(transcription, DNA-templated);GO:0006355(regulation of transcription, DNA-templated);GO:0009742(brassinosteroid mediated signaling pathway)	04075(Plant hormone signal transduction)	K14503	NA	BES1/BZR1 homolog protein 4 isoform X1 [Populus trichocarpa]	0.271284	-1.88212	0.0489848	0.306068	down	yes
Potri.001G388200.1	Potri.001G388200	GO:0004503(monophenol monooxygenase activity);GO:0036263(L-DOPA monooxygenase activity)	00350(Tyrosine metabolism);00950(Isoquinoline alkaloid biosynthesis)	K00422	EC:1.10.3.1	polyphenol oxidase, chloroplastic [Populus trichocarpa]	2.90812	1.54009	0.0421107	0.282875	up	Potri.001G388200	GO:0004503(monophenol monooxygenase activity);GO:0036263(L-DOPA monooxygenase activity)	00350(Tyrosine metabolism);00950(Isoquinoline alkaloid biosynthesis)	K00422	EC:1.10.3.1	polyphenol oxidase, chloroplastic [Populus trichocarpa]	0.486126	-1.0406	0.0371783	0.255133	down	yes
Potri.001G393400.1	Potri.001G393400	GO:0005515(protein binding);GO:0005739(mitochondrion);GO:0006397(mRNA processing);GO:0009451(RNA modification);GO:0009507(chloroplast);GO:0016554(cytidine to uridine editing);GO:0050897(cobalt ion binding);GO:0080156(mitochondrial mRNA modification)	00640(Propanoate metabolism);00280(Valine, leucine and isoleucine degradation)	K09699	EC:2.3.1.168	multiple organellar RNA editing factor 8, chloroplastic/mitochondrial isoform X1 [Populus trichocarpa]	3.6747e-05	-14.732	7.72549e-11	1.22164e-08	down	Potri.001G393400	GO:0005515(protein binding);GO:0005739(mitochondrion);GO:0006397(mRNA processing);GO:0009451(RNA modification);GO:0009507(chloroplast);GO:0016554(cytidine to uridine editing);GO:0050897(cobalt ion binding);GO:0080156(mitochondrial mRNA modification)	00640(Propanoate metabolism);00280(Valine, leucine and isoleucine degradation)	K09699	EC:2.3.1.168	multiple organellar RNA editing factor 8, chloroplastic/mitochondrial isoform X1 [Populus trichocarpa]	0.00184005	-9.08604	0.0208517	0.172526	down	yes
Potri.001G393400.3	Potri.001G393400	GO:0005515(protein binding);GO:0005739(mitochondrion);GO:0006397(mRNA processing);GO:0009451(RNA modification);GO:0009507(chloroplast);GO:0016554(cytidine to uridine editing);GO:0050897(cobalt ion binding);GO:0080156(mitochondrial mRNA modification)	00640(Propanoate metabolism);00280(Valine, leucine and isoleucine degradation)	K09699	EC:2.3.1.168	PREDICTED: uncharacterized protein At3g15000, mitochondrial isoform X1 [Populus euphratica]	0.000234716	-12.0568	0.00781405	0.0910473	down	Potri.001G393400	GO:0005515(protein binding);GO:0005739(mitochondrion);GO:0006397(mRNA processing);GO:0009451(RNA modification);GO:0009507(chloroplast);GO:0016554(cytidine to uridine editing);GO:0050897(cobalt ion binding);GO:0080156(mitochondrial mRNA modification)	00640(Propanoate metabolism);00280(Valine, leucine and isoleucine degradation)	K09699	EC:2.3.1.168	PREDICTED: uncharacterized protein At3g15000, mitochondrial isoform X1 [Populus euphratica]	0.0145211	-6.10571	0.0341658	0.241941	down	yes
Potri.001G394500.2	Potri.001G394500	GO:0005886(plasma membrane);GO:0008514(organic anion transmembrane transporter activity);GO:0008643(carbohydrate transport);GO:0016021(integral component of membrane);GO:0022626(cytosolic ribosome)	NA	NA	NA	PREDICTED: probable sugar phosphate/phosphate translocator At3g14410 [Populus euphratica]	0.00274897	-8.5069	1.16722e-09	1.02915e-07	down	Potri.001G394500	GO:0005886(plasma membrane);GO:0008514(organic anion transmembrane transporter activity);GO:0008643(carbohydrate transport);GO:0016021(integral component of membrane);GO:0022626(cytosolic ribosome)	NA	NA	NA	PREDICTED: probable sugar phosphate/phosphate translocator At3g14410 [Populus euphratica]	0.0074892	-7.06097	8.50374e-11	1.0717e-08	down	yes
Potri.001G397800.1	Potri.001G397800	GO:0004674(protein serine/threonine kinase activity);GO:0005829(cytosol);GO:0006468(protein phosphorylation);GO:0035556(intracellular signal transduction)	NA	NA	NA	protein RICE SALT SENSITIVE 3 isoform X1 [Populus trichocarpa]	9.13255	3.19102	0.0158367	0.150261	up	Potri.001G397800	GO:0004674(protein serine/threonine kinase activity);GO:0005829(cytosol);GO:0006468(protein phosphorylation);GO:0035556(intracellular signal transduction)	NA	NA	NA	protein RICE SALT SENSITIVE 3 isoform X1 [Populus trichocarpa]	9.02592	3.17407	0.00890215	0.0924153	up	yes
Potri.001G399200.1	Potri.001G399200	GO:0005576(extracellular region);GO:0005615(extracellular space);GO:0009863(salicylic acid mediated signaling pathway);GO:0009867(jasmonic acid mediated signaling pathway);GO:0010193(response to ozone);GO:0010942(positive regulation of cell death);GO:0042742(defense response to bacterium);GO:0048046(apoplast);GO:0048316(seed development);GO:0080141(regulation of jasmonic acid biosynthetic process…	NA	NA	NA	protein GRIM REAPER [Populus trichocarpa]	0.345204	-1.53448	0.00760891	0.0893597	down	Potri.001G399200	GO:0005576(extracellular region);GO:0005615(extracellular space);GO:0009863(salicylic acid mediated signaling pathway);GO:0009867(jasmonic acid mediated signaling pathway);GO:0010193(response to ozone);GO:0010942(positive regulation of cell death);GO:0042742(defense response to bacterium);GO:0048046(apoplast);GO:0048316(seed development);GO:0080141(regulation of jasmonic acid biosynthetic process…	NA	NA	NA	protein GRIM REAPER [Populus trichocarpa]	0.0657333	-3.92723	1.22966e-06	3.78472e-05	down	yes
Potri.001G399400.5	Potri.001G399400	GO:0003729(mRNA binding);GO:0005515(protein binding);GO:0005737(cytoplasm);GO:0005783(endoplasmic reticulum);GO:0005789(endoplasmic reticulum membrane);GO:0005829(cytosol);GO:0005886(plasma membrane);GO:0009506(plasmodesma);GO:0010155(regulation of proton transport);GO:0016021(integral component of membrane)	NA	NA	NA	proton pump-interactor 1 [Populus trichocarpa]	52.823	5.72309	0.0278478	0.218264	up	Potri.001G399400	GO:0003729(mRNA binding);GO:0005515(protein binding);GO:0005737(cytoplasm);GO:0005783(endoplasmic reticulum);GO:0005789(endoplasmic reticulum membrane);GO:0005829(cytosol);GO:0005886(plasma membrane);GO:0009506(plasmodesma);GO:0010155(regulation of proton transport);GO:0016021(integral component of membrane)	NA	NA	NA	proton pump-interactor 1 [Populus trichocarpa]	227.705	7.83102	0.0374728	0.256388	up	yes
Potri.001G400100.1	Potri.001G400100	GO:0005507(copper ion binding);GO:0005576(extracellular region);GO:0005623(cell);GO:0006878(cellular copper ion homeostasis);GO:0008270(zinc ion binding)	NA	NA	NA	hypothetical protein POPTR_001G400200 [Populus trichocarpa]	9600.3	13.2289	8.70467e-09	4.86696e-07	up	Potri.001G400100	GO:0005507(copper ion binding);GO:0005576(extracellular region);GO:0005623(cell);GO:0006878(cellular copper ion homeostasis);GO:0008270(zinc ion binding)	NA	NA	NA	hypothetical protein POPTR_001G400200 [Populus trichocarpa]	15084.3	13.8808	0.000619566	0.0111387	up	yes
Potri.001G402600.9	Potri.001G402600	GO:0005507(copper ion binding);GO:0005794(Golgi apparatus);GO:0005829(cytosol);GO:0008150(biological_process);GO:0008270(zinc ion binding);GO:0009506(plasmodesma);GO:0045735(nutrient reservoir activity)	NA	NA	NA	glutelin type-A 3 [Populus trichocarpa]	0.000305763	-11.6753	1.03132e-08	5.51202e-07	down	Potri.001G402600	GO:0005507(copper ion binding);GO:0005794(Golgi apparatus);GO:0005829(cytosol);GO:0008150(biological_process);GO:0008270(zinc ion binding);GO:0009506(plasmodesma);GO:0045735(nutrient reservoir activity)	NA	NA	NA	glutelin type-A 3 [Populus trichocarpa]	0.000305763	-11.6753	9.00483e-09	4.40997e-07	down	yes
Potri.001G403700.2	Potri.001G403700	GO:0005515(protein binding);GO:0005634(nucleus);GO:0005794(Golgi apparatus);GO:0005886(plasma membrane);GO:0006351(transcription, DNA-templated);GO:0009416(response to light stimulus);GO:0009718(anthocyanin-containing compound biosynthetic process);GO:0015995(chlorophyll biosynthetic process);GO:0045893(positive regulation of transcription, DNA-templated)	NA	NA	NA	COP1-interacting protein 7 [Populus trichocarpa]	0.0240026	-5.38066	3.51254e-08	1.51436e-06	down	Potri.001G403700	GO:0005515(protein binding);GO:0005634(nucleus);GO:0005794(Golgi apparatus);GO:0005886(plasma membrane);GO:0006351(transcription, DNA-templated);GO:0009416(response to light stimulus);GO:0009718(anthocyanin-containing compound biosynthetic process);GO:0015995(chlorophyll biosynthetic process);GO:0045893(positive regulation of transcription, DNA-templated)	NA	NA	NA	COP1-interacting protein 7 [Populus trichocarpa]	0.0026732	-8.54722	2.25073e-06	6.70071e-05	down	yes
Potri.001G403700.3	Potri.001G403700	GO:0005515(protein binding);GO:0005634(nucleus);GO:0005794(Golgi apparatus);GO:0005886(plasma membrane);GO:0006351(transcription, DNA-templated);GO:0009416(response to light stimulus);GO:0009718(anthocyanin-containing compound biosynthetic process);GO:0015995(chlorophyll biosynthetic process);GO:0045893(positive regulation of transcription, DNA-templated)	NA	NA	NA	COP1-interacting protein 7 [Populus trichocarpa]	0.000130305	-12.9058	0.00025899	0.00604996	down	Potri.001G403700	GO:0005515(protein binding);GO:0005634(nucleus);GO:0005794(Golgi apparatus);GO:0005886(plasma membrane);GO:0006351(transcription, DNA-templated);GO:0009416(response to light stimulus);GO:0009718(anthocyanin-containing compound biosynthetic process);GO:0015995(chlorophyll biosynthetic process);GO:0045893(positive regulation of transcription, DNA-templated)	NA	NA	NA	COP1-interacting protein 7 [Populus trichocarpa]	0.000130305	-12.9058	0.000189407	0.00401976	down	yes
Potri.001G403700.4	Potri.001G403700	GO:0005515(protein binding);GO:0005634(nucleus);GO:0005794(Golgi apparatus);GO:0005886(plasma membrane);GO:0006351(transcription, DNA-templated);GO:0009416(response to light stimulus);GO:0009718(anthocyanin-containing compound biosynthetic process);GO:0015995(chlorophyll biosynthetic process);GO:0045893(positive regulation of transcription, DNA-templated)	NA	NA	NA	COP1-interacting protein 7 [Populus trichocarpa]	0.190209	-2.39435	6.40053e-06	0.000206475	down	Potri.001G403700	GO:0005515(protein binding);GO:0005634(nucleus);GO:0005794(Golgi apparatus);GO:0005886(plasma membrane);GO:0006351(transcription, DNA-templated);GO:0009416(response to light stimulus);GO:0009718(anthocyanin-containing compound biosynthetic process);GO:0015995(chlorophyll biosynthetic process);GO:0045893(positive regulation of transcription, DNA-templated)	NA	NA	NA	COP1-interacting protein 7 [Populus trichocarpa]	0.0582707	-4.10109	3.46904e-09	2.02487e-07	down	yes
Potri.001G404900.1	Potri.001G404900	GO:0005524(ATP binding);GO:0006952(defense response);GO:0043531(ADP binding)	04626(Plant-pathogen interaction)	K13459	NA	PREDICTED: probable disease resistance protein At4g27220 [Populus euphratica]	0.000300988	-11.698	3.66023e-09	2.50394e-07	down	Potri.001G404900	GO:0005524(ATP binding);GO:0006952(defense response);GO:0043531(ADP binding)	04626(Plant-pathogen interaction)	K13459	NA	PREDICTED: probable disease resistance protein At4g27220 [Populus euphratica]	0.000207682	-12.2333	0.0237248	0.188229	down	yes
Potri.001G406700.5	Potri.001G406700	GO:0005887(integral component of plasma membrane);GO:0009055(electron transfer activity);GO:0015035(protein disulfide oxidoreductase activity);GO:0017004(cytochrome complex assembly);GO:0045454(cell redox homeostasis)	NA	NA	NA	cytochrome c-type biogenesis ccda-like chloroplastic protein isoform X1 [Populus trichocarpa]	1500.07	10.5508	0.0324091	0.240478	up	Potri.001G406700	GO:0005887(integral component of plasma membrane);GO:0009055(electron transfer activity);GO:0015035(protein disulfide oxidoreductase activity);GO:0017004(cytochrome complex assembly);GO:0045454(cell redox homeostasis)	NA	NA	NA	cytochrome c-type biogenesis ccda-like chloroplastic protein isoform X1 [Populus trichocarpa]	1893.05	10.8865	1.31295e-06	4.02893e-05	up	yes
Potri.001G409400.1	Potri.001G409400	GO:0004674(protein serine/threonine kinase activity);GO:0005886(plasma membrane);GO:0006468(protein phosphorylation);GO:0006952(defense response);GO:0009506(plasmodesma)	NA	NA	NA	hypothetical protein POPTR_001G409400, partial [Populus trichocarpa]	2084.45	11.0255	0.0078701	0.0914915	up	Potri.001G409400	GO:0004674(protein serine/threonine kinase activity);GO:0005886(plasma membrane);GO:0006468(protein phosphorylation);GO:0006952(defense response);GO:0009506(plasmodesma)	NA	NA	NA	hypothetical protein POPTR_001G409400, partial [Populus trichocarpa]	1625.64	10.6668	1.34173e-07	4.55588e-06	up	yes
Potri.001G413500.1	Potri.001G413500	GO:0003674(molecular_function);GO:0005777(peroxisome);GO:0005829(cytosol);GO:0008150(biological_process);GO:0009507(chloroplast);GO:0009570(chloroplast stroma)	04146(Peroxisome)	K13346	NA	stress-response A/B barrel domain-containing protein UP3 [Populus trichocarpa]	5510.94	12.4281	9.86249e-11	1.46146e-08	up	Potri.001G413500	GO:0003674(molecular_function);GO:0005777(peroxisome);GO:0005829(cytosol);GO:0008150(biological_process);GO:0009507(chloroplast);GO:0009570(chloroplast stroma)	04146(Peroxisome)	K13346	NA	stress-response A/B barrel domain-containing protein UP3 [Populus trichocarpa]	65977.6	16.0097	5.43983e-11	7.48172e-09	up	yes
Potri.001G415100.7	Potri.001G415100	GO:0010334(sesquiterpene synthase activity);GO:0033383(geranyl diphosphate metabolic process)	00909(Sesquiterpenoid and triterpenoid biosynthesis)	K15803	EC:4.2.3.75	(-)-germacrene D synthase [Populus trichocarpa x Populus deltoides]	7.89985	2.98182	9.87905e-07	3.43929e-05	up	Potri.001G415100	GO:0010334(sesquiterpene synthase activity);GO:0033383(geranyl diphosphate metabolic process)	00909(Sesquiterpenoid and triterpenoid biosynthesis)	K15803	EC:4.2.3.75	(-)-germacrene D synthase [Populus trichocarpa x Populus deltoides]	2.37094	1.24546	0.042157	0.277462	up	yes
Potri.001G415200.4	Potri.001G415200	GO:0003700(DNA binding transcription factor activity);GO:0005634(nucleus);GO:0006355(regulation of transcription, DNA-templated);GO:0043565(sequence-specific DNA binding)	04075(Plant hormone signal transduction)	K14494	NA	scarecrow-like protein 21 [Populus trichocarpa]	11888.3	13.5373	5.93354e-10	6.06383e-08	up	Potri.001G415200	GO:0003700(DNA binding transcription factor activity);GO:0005634(nucleus);GO:0006355(regulation of transcription, DNA-templated);GO:0043565(sequence-specific DNA binding)	04075(Plant hormone signal transduction)	K14494	NA	scarecrow-like protein 21 [Populus trichocarpa]	6478.9	12.6615	2.68377e-09	1.65816e-07	up	yes
Potri.001G418800.2	Potri.001G418800	GO:0005739(mitochondrion);GO:0009029(tetraacyldisaccharide 4'-kinase activity);GO:0016310(phosphorylation);GO:2001289(lipid X metabolic process)	NA	NA	NA	hypothetical protein POPTR_001G418800 [Populus trichocarpa]	2516.79	11.2974	0.00400663	0.0554375	up	Potri.001G418800	GO:0005739(mitochondrion);GO:0009029(tetraacyldisaccharide 4'-kinase activity);GO:0016310(phosphorylation);GO:2001289(lipid X metabolic process)	NA	NA	NA	hypothetical protein POPTR_001G418800 [Populus trichocarpa]	2607.82	11.3486	0.00442418	0.0543332	up	yes
Potri.001G421000.1	Potri.001G421000	GO:0003674(molecular_function);GO:0005575(cellular_component);GO:0008150(biological_process)	NA	NA	NA	uncharacterized protein LOC18095940 [Populus trichocarpa]	142.082	7.15058	1.08206e-18	8.21599e-16	up	Potri.001G421000	GO:0003674(molecular_function);GO:0005575(cellular_component);GO:0008150(biological_process)	NA	NA	NA	uncharacterized protein LOC18095940 [Populus trichocarpa]	67.8614	6.08452	0.000823328	0.0140495	up	yes
Potri.001G422500.3	Potri.001G422500	GO:0004497(monooxygenase activity);GO:0007275(multicellular organism development);GO:0010268(brassinosteroid homeostasis);GO:0016125(sterol metabolic process);GO:0016132(brassinosteroid biosynthetic process)	NA	NA	NA	taxane 13-alpha-hydroxylase-like [Populus trichocarpa]	2882.55	11.4931	1.73118e-08	8.48723e-07	up	Potri.001G422500	GO:0004497(monooxygenase activity);GO:0007275(multicellular organism development);GO:0010268(brassinosteroid homeostasis);GO:0016125(sterol metabolic process);GO:0016132(brassinosteroid biosynthetic process)	NA	NA	NA	taxane 13-alpha-hydroxylase-like [Populus trichocarpa]	3281.14	11.68	1.4292e-08	6.44921e-07	up	yes
Potri.001G423200.3	Potri.001G423200	GO:0010494(cytoplasmic stress granule);GO:0010603(regulation of cytoplasmic mRNA processing body assembly);GO:0034063(stress granule assembly)	NA	NA	NA	uncharacterized protein LOC18095972 isoform X1 [Populus trichocarpa]	82.9373	6.37395	0.00364929	0.0514541	up	Potri.001G423200	GO:0010494(cytoplasmic stress granule);GO:0010603(regulation of cytoplasmic mRNA processing body assembly);GO:0034063(stress granule assembly)	NA	NA	NA	uncharacterized protein LOC18095972 isoform X1 [Populus trichocarpa]	10.364	3.37351	0.0388564	0.262795	up	yes
[truncated: 10,016 more rows]

## Sheet: Table S6
Supplementary Table 6 Prediction of cis target mRNAs of significantly DE-lncRNAs.
					NO3- vs. NH4NO3																		NH4+ vs. NH4NO3
mRNA					mRNA						lncRNA												mRNA						lncRNA
[truncated: 601 more rows]

## Sheet: Table S7
Supplementary Table 7 Prediction of trans target mRNAs of significantly DE-lncRNAs.
					NO3- vs. NH4NO3																		NH4+ vs. NH4NO3
mRNA					mRNA						lncRNA												mRNA						lncRNA
[truncated: 2,492 more rows]

## Sheet: Table S8
Supplementary Table 8 LncRNA transcripts as precursors for known and candidate novel miRNAs
query_id	subject_id	%identity	alignment_length	Mismatches	gap_opens	q.Start	q.End	s.Start	s.End	Evalue	bit_score
[truncated: 86 more rows]

## Sheet: Table S9
Supplementary Table 9 LncRNA transcripts as targets of miRNAs in P. × canescens
[truncated: 80 more rows]

[truncated: 1 more sheets:  Table S10]
